# Supplementary material for: Enablers and barriers to implementing obesity assessments in clinical practice: a rapid mixed-methods systematic review
Source: PubMed Central journal article supplement — BMJ Open. 2022 Nov 29;12(11):e063659. doi: 10.1136/bmjopen-2022-063659 (PMC9710371; doi:10.1136/bmjopen-2022-063659), 2022-11-29
Supplement: bmjopen-2022-063659.draft_revisions.pdf [file bmjopen-2022-063659.draft_revisions.pdf]

# BMJ Open

BMJ Open is committed to open peer review. As part of this commitment we make the peer review history of every article we publish publicly available.

When an article is published we post the peer reviewers' comments and the authors' responses online. We also post the versions of the paper that were used during peer review. These are the versions that the peer review comments apply to.

The versions of the paper that follow are the versions that were submitted during the peer review process. They are not the versions of record or the final published versions. They should not be cited or distributed as the published version of this manuscript.

BMJ Open is an open access journal and the full, final, typeset and author-corrected version of record of the manuscript is available on our site with no access controls, subscription charges or pay-per-view fees (<http://bmjopen.bmj.com>).

If you have any questions on BMJ Open's open peer review process please email [info.bmjopen@bmj.com](mailto:info.bmjopen@bmj.com)

# BMJ Open

## Enablers and barriers to implementing obesity assessments in clinical practice: a rapid mixed methods systematic review

|                               |                                                                                                                                                                                                                                                                                                                                                                                                                                                                                                                                 |
|-------------------------------|---------------------------------------------------------------------------------------------------------------------------------------------------------------------------------------------------------------------------------------------------------------------------------------------------------------------------------------------------------------------------------------------------------------------------------------------------------------------------------------------------------------------------------|
| Journal:                      | <i>BMJ Open</i>                                                                                                                                                                                                                                                                                                                                                                                                                                                                                                                 |
| Manuscript ID                 | bmjopen-2022-063659                                                                                                                                                                                                                                                                                                                                                                                                                                                                                                             |
| Article Type:                 | Original research                                                                                                                                                                                                                                                                                                                                                                                                                                                                                                               |
| Date Submitted by the Author: | 07-Apr-2022                                                                                                                                                                                                                                                                                                                                                                                                                                                                                                                     |
| Complete List of Authors:     | Atlantis, Evan; Western Sydney University, Chimoriya, Ritesh; Western Sydney University, Seifu, Canaan; Western Sydney University, Peters, Kath; Western Sydney University, Murphy, Gill; Western Sydney University, Carr, Bernadette ; University of Sydney - Camperdown and Darlington Campus Burkitt-Ford Library<br>Lim, David; Western Sydney University - Campbelltown Campus, School of Health Sciences; Flinders University, Centre for Remote Health<br>Fahey, P; Western Sydney University, School of Health Sciences |
| Keywords:                     | PRIMARY CARE, Quality in health care < HEALTH SERVICES ADMINISTRATION & MANAGEMENT, PREVENTIVE MEDICINE, QUALITATIVE RESEARCH                                                                                                                                                                                                                                                                                                                                                                                                   |
|                               |                                                                                                                                                                                                                                                                                                                                                                                                                                                                                                                                 |

SCHOLARONE™  
Manuscripts

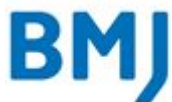

I, the Submitting Author has the right to grant and does grant on behalf of all authors of the Work (as defined in the below author licence), an exclusive licence and/or a non-exclusive licence for contributions from authors who are: i) UK Crown employees; ii) where BMJ has agreed a CC-BY licence shall apply, and/or iii) in accordance with the terms applicable for US Federal Government officers or employees acting as part of their official duties; on a worldwide, perpetual, irrevocable, royalty-free basis to BMJ Publishing Group Ltd ("BMJ") its licensees and where the relevant Journal is co-owned by BMJ to the co-owners of the Journal, to publish the Work in this journal and any other BMJ products and to exploit all rights, as set out in our [licence](#).

The Submitting Author accepts and understands that any supply made under these terms is made by BMJ to the Submitting Author unless you are acting as an employee on behalf of your employer or a postgraduate student of an affiliated institution which is paying any applicable article publishing charge ("APC") for Open Access articles. Where the Submitting Author wishes to make the Work available on an Open Access basis (and intends to pay the relevant APC), the terms of reuse of such Open Access shall be governed by a Creative Commons licence – details of these licences and which [Creative Commons](#) licence will apply to this Work are set out in our licence referred to above.

Other than as permitted in any relevant BMJ Author's Self Archiving Policies, I confirm this Work has not been accepted for publication elsewhere, is not being considered for publication elsewhere and does not duplicate material already published. I confirm all authors consent to publication of this Work and authorise the granting of this licence.

1 **Title: Enablers and barriers to implementing obesity assessments in clinical practice: a rapid mixed**  
2 **methods systematic review**  
3  
4  
5  
6

7 \*Evan Atlantis<sup>1,2,3</sup>, Ritesh Chimoriya<sup>1,2,4</sup>, Canaan Negash Seifu<sup>1</sup>, Kath Peters<sup>2,5</sup>, Gillian Murphy<sup>2,5</sup>,  
8  
9 Bernadette Carr<sup>6</sup>, David Lim<sup>1</sup>, and Paul P. Fahey<sup>1,2</sup>  
10  
11  
12  
13

14 <sup>1</sup>School of Health Sciences, Western Sydney University, Campbelltown, NSW 2560, Australia  
15

16 <sup>2</sup>Translational Health Research Institute, Western Sydney University, Campbelltown, NSW 2560, Australia  
17

18 <sup>3</sup>Discipline of Medicine, Faculty of Medicine and Health, Nepean Clinical School, The University of  
19 Sydney, Sydney, NSW 2006, Australia  
20  
21  
22

23 <sup>4</sup>School of Medicine, Western Sydney University, Campbelltown, NSW 2560, Australia  
24

25 <sup>5</sup>School of Nursing and Midwifery, Western Sydney University, Campbelltown, NSW 2560, Australia  
26  
27

28 <sup>6</sup>The University of Sydney, Sydney, NSW 2006, Australia  
29  
30  
31

32 **\*Corresponding author:**  
33  
34

35 Name: Evan Atlantis  
36

37 Email: [E.Atlantis@westernsydney.edu.au](mailto:E.Atlantis@westernsydney.edu.au)  
38  
39

40 **Short running title** Enablers and barriers to implementing obesity assessments in clinical practice  
41  
42

43 **Keywords** Weight Related Complications; Diagnostic Techniques and Procedures; Mass Screening;  
44  
45 Overweight  
46  
47  
48  
49  
50  
51  
52  
53  
54  
55  
56  
57  
58  
59  
60

## ABSTRACT

**Objectives:** This systematic review aims to improve our knowledge of enablers and barriers to implementing obesity related anthropometric assessments in clinical practice.

**Design:** A mixed methods systematic review.

**Data sources:** Medline, Embase, and CINAHL to November 2021.

**Eligibility criteria:** Quantitative studies that reported patient factors associated with obesity assessments in clinical practice (general practice or primary care); and qualitative studies that reported views of health care professionals about enablers and barriers to their implementation.

**Data extraction and synthesis:** We used random-effects meta-analysis to pool ratios for categorical predictors reported in  $\geq$ three studies expressed as pooled Risk Ratio (RR) with 95% Confidence Interval (CI), applied inverse variance weights, and investigated statistical heterogeneity ( $I^2$ ), publication bias (Egger's test), and sensitivity analyses. We used reflexive thematic analysis for qualitative data and applied a convergent integrated approach to synthesis.

**Results:** We reviewed 22 quantitative (observational) and three qualitative studies published between 2004 and 2020. All had  $\geq$ 50% of the quality items for risk of bias assessments. Obesity assessment in clinical practice was positively associated with patient factors: female sex (RR 1.28, 95%CI:1.10,1.50,  $I^2$  99.8%, mostly UK/US studies), socio-economic deprivation (RR 1.21, 95%CI:1.18,1.24,  $I^2$  73.9%, UK studies), non-White race/ethnicity (RR 1.27, 95%CI:1.03,1.57,  $I^2$  99.6%), and comorbidities (RR 2.11, 95%CI:1.60,2.79,  $I^2$  99.6%, consistent across most countries). Obesity assessment was also most common in the heaviest body mass index group (RR 1.55, 95%CI:0.99,2.45,  $I^2$  99.6%). Views of health care professionals were positive about obesity assessments when linked to patient health (convergent with meta-analysis for comorbidities) and if part of routine practice, but negative about their role, training, time, resources, and incentives in the health care system.

**Conclusions:** Our evidence synthesis revealed several important enablers and barriers to obesity assessments that should inform health care professionals and relevant stakeholders to encourage adherence to clinical practice guideline recommendations.

## Strengths and limitations of this study

- Study design that allowed a convergent integrated synthesis of evidence from quantitative and qualitative studies on the enablers and barriers to implementing obesity related anthropometric assessments in clinical practice.
- Comprehensive search strategy of major electronic databases and rigorous data extraction and risk of bias assessments.
- Conclusive results from several meta-analyses corrected for heterogeneity across studies and convergent with results from rigorous thematic analysis.
- Results from meta-analyses were based on observational studies and slightly weakened or inconclusive for some patient factors. Small number of qualitative studies reviewed also limits the applicability of our findings to encourage better adherence to clinical practice guideline recommendations.

## INTRODUCTION

Obesity rates have nearly tripled in most countries since 1975.<sup>1</sup> The rising health problems attributable to obesity are undoubtedly challenging health systems worldwide.<sup>2</sup> As the first point of contact for most people seeking health care services, general practice or primary care ('clinical practice') remains at the forefront of efforts to prevent and manage obesity.<sup>2</sup> Although a range of evidence-based guidelines provide recommendations on how to provide effective weight management in clinical practice,<sup>3</sup> obesity and related complications remain under diagnosed and poorly treated.<sup>4 5</sup> Quality improvements in obesity care would result in significant population health and economic benefits.<sup>6-9</sup>

Most international guidelines recommend that Body Mass Index (BMI) should be used as a routine measure for diagnosis.<sup>3 10</sup> They also recommend that Waist Circumference (WC) should be considered as an additional measure to assess the risk of developing obesity related complications.<sup>3</sup> There is a growing body of evidence indicating that routine clinical practices for obesity related anthropometric measures fall short of guideline recommendations and standards.<sup>2</sup> Studies have reported that the rate of weight, BMI, or WC measurement in clinical practice could be as low as 20 to 30%, even in high-income countries.<sup>11 12</sup> The reasons for such low

adherence rates to these guideline recommendations are likely to vary across countries. For instance, patient factors such as female sex was associated with an increased likelihood of weight recording in the United Kingdom (UK)<sup>11</sup> but not in the Netherlands,<sup>13</sup> and was associated with a decreased likelihood of BMI documentation in Australia.<sup>12</sup> Cardiovascular disease was associated with an increased likelihood of a weight recording in the Netherlands,<sup>13</sup> whereas a reverse association was reported in Australia.<sup>12</sup> Furthermore, qualitative research suggests that health care professionals report several barriers to implementing obesity related anthropometric measure in clinical practice such as lack of knowledge and specific training, negative perceptions about its usefulness, clinical importance, and acceptability.<sup>14</sup> Given the existence of relevant quantitative and qualitative studies, as well as several inconsistencies within this evidence base, this mixed methods systematic review aims to improve our knowledge of the enablers and barriers to implementing obesity assessments in clinical practice.

## METHODS

### Protocol and registration

We developed the protocol for this systematic review with guidance from previous research,<sup>15-17</sup> the Centre for Review and Dissemination's Guidance for undertaking reviews in health care,<sup>18</sup> the JBI methodology for mixed methods systematic reviews using a convergent integrated approach to synthesis and integration,<sup>19</sup> and the Preferred Reporting Items for Systematic review and Meta-Analysis Protocols statement.<sup>20</sup>

### Eligibility

Using modified versions of the Population, Interventions, Comparators, and Outcomes (PICO) framework, we developed two research questions and selected study eligibility criteria (Table 1).<sup>21</sup>

**Table 1: Inclusion criteria for quantitative and qualitative studies.**

| Parameter                   |                        | Criteria                                                               |
|-----------------------------|------------------------|------------------------------------------------------------------------|
| <b>Quantitative studies</b> |                        |                                                                        |
| <b>P</b>                    | Population and setting | Adult patients in clinical practice (general practice or primary care) |

|                            |                                          |                                                                                                                                                                                                                                                                                                                                                                                                             |
|----------------------------|------------------------------------------|-------------------------------------------------------------------------------------------------------------------------------------------------------------------------------------------------------------------------------------------------------------------------------------------------------------------------------------------------------------------------------------------------------------|
| <b>P</b>                   | Patient factor<br>(independent variable) | Patient factors associated with implementing obesity related anthropometric assessments such as previous obesity related anthropometric assessment (e.g., weight, waist circumference, and BMI); demographic characteristics (e.g., age, sex, and ethnicity); existing medical conditions (e.g., type 2 diabetes, hypertension, and hyperlipidaemia); and clinical encounter (e.g., reason for appointment) |
| <b>O</b>                   | Outcome (dependent variable)             | Obesity related anthropometric assessments (e.g., weight, BMI, waist circumference, and weight-to-hip ratio)                                                                                                                                                                                                                                                                                                |
| <b>Qualitative studies</b> |                                          |                                                                                                                                                                                                                                                                                                                                                                                                             |
| <b>P</b>                   | Population and setting                   | Health care professionals in clinical practice (general practice or primary care)                                                                                                                                                                                                                                                                                                                           |
| <b>I</b>                   | Interest                                 | Health care professionals' views (perspectives, or experiences) about implementing obesity related anthropometric assessments in clinical practice                                                                                                                                                                                                                                                          |
| <b>Co</b>                  | Context                                  | Any country worldwide                                                                                                                                                                                                                                                                                                                                                                                       |

### 1. Quantitative research question

What are the patient factors associated with implementing obesity related anthropometric assessments in clinical practice?

### 2. Qualitative research question

What are the views of health care professionals about implementing obesity related anthropometric assessments in clinical practice?

To answer the quantitative research question, we considered observational studies (e.g., cohort, cross-sectional, case-control, and case series) that reported associations between patient factors (independent variables) and outcomes (dependent variables) in the clinical practice setting (general practice or primary



care). For the qualitative research question, we considered qualitative studies that reported on the views of health care professionals about enablers and barriers to implementing obesity related anthropometric assessments in the clinical practice setting. We considered qualitative studies using designs such as phenomenological, ethnographic, grounded theory, historical, case study, and action research.

### **Search strategy, information sources, and study selection**

The academic Liaison Librarian (BC) developed our search strategy in consultation with the subject expert (EA). She searched Medline, Embase, and CINAHL databases for potentially relevant articles on 25<sup>th</sup> September 2021. Due to a typographical error for one search term used in Embase, she repeated the search in that database on 25<sup>th</sup> November 2021. The mixed methods, quantitative, and qualitative search string was adapted from the OVID expert search tool 'Mixed Methods' (Supplementary Table S1). All records identified were exported from the databases into EndNote 20 reference manager and duplicate records were removed where possible. All titles and abstracts were first screened for eligibility against the criteria mentioned above. Second, the available full-length reports retrieved from these records were screened for possible inclusion. We considered studies published in English language without any restrictions on the publication date and geographical location. References from included studies were also searched. Reasons why studies identified in the second screen were excluded are available in the Supplementary (Supplementary Table S2).

### **Data extraction and risk of bias assessment**

We independently extracted key characteristics and assessed the risk of bias of the quantitative (RC, CNS, DL, and EA) and qualitative (KP, GM, and EA) studies included for review using the JBI's standardized critical appraisal checklists.<sup>22</sup> We used this information to assist our discussion on the strength of the body of evidence following our synthesis of results. For quantitative studies, we sought information about study details, population and setting, patient factors (independent variables), outcomes (obesity related anthropometric assessments), statistical methods, results/effect estimates, and author's conclusions. For qualitative studies, we sought information about study details, population and setting, study design, aims and methods, main themes and subthemes with explanations, and author's conclusions.

## Effect measures

Results for categorical predictor variables, where the effect was expressed as a ratio relative to a reference category accompanied by a 95% Confidence Interval (CI), were considered for pooling. These results comprised Risk Ratios (RRs), rate ratios, and Odds Ratios (ORs) with no hazard ratios reported. Results which were only reported as frequency counts were converted to RRs and associated 95% CIs using an appropriate online calculator via the VassarStats website.<sup>23</sup>

## Synthesis methods

To allow pooling of results, we expressed ratios relative to the same or a similar reference category. Where reference categories were swapped (for example, females defined as the reference category instead of males), we corrected the reference category by inverting the ratio (and associated 95% CI) around the null value of '1'. Where a numeric variable had been categorised into varying categories, the lowest category was taken as the reference category and the highest category compared to it. Where there was a common reference category but varied comparator categories, the comparator categories were combined using the method by Borenstein and colleagues.<sup>24</sup> For example, for the variable 'race', as 'White' was the common reference category, the results for the various non-White categories were re-combined to produce a single 'non-White' to 'White' ratio. Where a single study presented results separately in independent subgroups (such as separate results for males and females), ratios were first combined using a fixed effects meta-analysis prior to being pooled with results from other studies. Once reference categories, comparator categories, and subgroups had been corrected, random-effects meta-analysis was used to pool ratios for predictors reported in three or more studies. To correct for heterogeneity across studies, we applied heterogeneous specific inverse variance weights in these analyses.<sup>25</sup> Meta-analysis was only conducted for the BMI assessment outcome as 'BMI recording' or 'BMI diagnosis recording', which was more commonly reported than alternatives such as WC. Results reported include the pooled ratio with associated 95% CI and p-value and the  $I^2$  statistic and the p-value from the heterogeneity test. Forest plots are used to present commonly reported predictors, while results for other predictors are tabulated.

1  
2 We used subgroup analyses to explore possible explanations for heterogeneity. This included assessing  
3 candidate grouping variables related to what was measured, how the results were summarised, and where the  
4 studies were conducted. Firstly, studies were stratified according to whether the outcome was the recording  
5 of BMI assessment or the recording of BMI as a health diagnosis. Secondly, as ORs generally overestimate  
6 RRs, studies could be stratified according to whether ORs or RRs were presented. Finally, as we assumed that  
7 different countries have different health care systems and policies, studies were stratified according to country  
8 (UK, United States [US], Australia or 'Other'). Subgroup analyses proceeded when at least two categories of  
9 the grouping variable contained at least three studies each. Sensitivity analyses, excluding all studies which  
10 failed to achieve 100% 'yes' responses on the quality assessment checklist, were conducted to check whether  
11 any of the findings were sensitive to study quality.  
12  
13  
14  
15  
16  
17  
18  
19  
20  
21  
22  
23  
24  
25  
26  
27

### 28 **Reporting bias assessment**

29  
30 Funnel plots were visually reviewed for indications of reporting bias and Egger's tests were reported for meta-  
31 analyses containing 10 or more studies only, as recommended in the Cochrane Handbook for Systematic  
32 Reviews of Interventions (section 13.3.5.4 Tests for funnel plot asymmetry).<sup>26</sup>  
33  
34  
35  
36  
37  
38

### 39 **Thematic analysis**

40  
41 We applied the widely used reflexive thematic analysis method by Braun and Clarke to establish findings  
42 from the qualitative data.<sup>27</sup> Studies were read several times by two authors (GM and KP). Each author  
43 extracted the main findings from individual studies. Further, as recommended,<sup>27</sup> we spent time individually  
44 coding to construct categories from the data. The categories were reviewed to seek potential commonalities  
45 and differences between the papers, from which themes were established. The two authors met regularly to  
46 review areas of data extraction, coding allocation, and theme creation. Ongoing reflexive discussions created  
47 a space for mutual understanding and agreement about the overarching themes.  
48  
49  
50  
51  
52  
53  
54  
55  
56  
57  
58  
59

## 60 **RESULTS**

## Study selection

A flow diagram of the study selection process appears below (Fig. 1). Our search strategy identified 3,784 records including four additional studies from other sources after 1,867 duplicates were removed. Of these, we excluded 3,680 records after the first screening, leaving 104 records for a second screening. After further assessment of 87 reports retrieved, we excluded 62 additional records for reasons summarized below and described in the Supplementary (Supplementary Table S2).

<<Figure 1>>

## Study characteristics

We present a detailed summary of the study characteristics in the Supplementary (Supplementary Tables S3 and S4). In total, there were 22 quantitative studies (observational)<sup>11-13 28-46</sup> and three qualitative studies,<sup>14 47 48</sup> published between 2004 and 2020. Eight studies were from the UK,<sup>11 14 37 39 40 43 46 47</sup> nine from the US,<sup>28 31 32 34 36 41 42 45 48</sup> four from Australia,<sup>12 33 35 44</sup> and one each from Germany,<sup>38</sup> Spain,<sup>30</sup> Israel,<sup>29</sup> and the Netherlands.<sup>13</sup> All three qualitative studies included interviews with 7 to 14 primary care practitioners.<sup>14 47 48</sup> All qualitative studies conducted semi-structured interviews and thematic analysis to explore health care professionals' views towards WC measurement including identification of possible barriers to carrying out the assessment,<sup>14</sup> primary care providers' perception of WC measurement rejection in primary care,<sup>48</sup> and primary care providers' perception of recognition of overweight and obesity.<sup>47</sup> Quantitative studies were based on records of patients from primary practices, with sample sizes between 100 and 1000 in three studies,<sup>28-30</sup> 1000 and 10,000 in six studies,<sup>13 31-35</sup> 10,000 and 100,000 in six studies,<sup>36-41</sup> and greater than 100,000 in seven studies.<sup>11 12 42-46</sup> The patient factors associated with the implementation of obesity related anthropometric assessment in primary care varied between studies, with sociodemographic factors such as age and sex identified in 16 studies,<sup>11-13 28 31 32 34 35 37-39 41-45</sup> ethnicity and/or race identified in nine studies,<sup>11 28 31 32 34 39 41 42 45</sup> and socioeconomic status identified in four studies.<sup>11 37 39 43</sup> Presence of co-morbidities or any specific medical condition was identified to be a patient factor independently associated with the obesity assessment in 20 studies.<sup>11-13 28-35 38-46</sup> Six studies identified insurance type as a factor associated with obesity related

anthropometric assessment.<sup>31 32 34-36 41 42</sup> Outcomes in studies varied, with 11 studies having BMI “measurements” or “recording” or “documentation” or “screening”,<sup>12 29 30 36 37 39-42 44 46</sup> four studies having obesity “diagnosis” or “recognition” or “identification”,<sup>28 31 38 40</sup> two studies having weight “recording” or “measurement”,<sup>11 13</sup> two studies having overweight/obesity “documentation”,<sup>32 34</sup> and one study each for null BMI recording,<sup>43</sup> weight and/or WC measurement,<sup>33</sup> ICD-9 codes for overweight/obesity,<sup>45</sup> and non-identification of overweight and obesity<sup>35</sup> as a dependent variable.

### **Risk of bias within studies**

We present the results of our quality assessment of each study in the Supplementary (Supplementary Table S5). All four cohort studies had at least 70% of the quality items clearly met,<sup>11 37 40 46</sup> with three studies having one to two items unclear.<sup>11 40 46</sup> Of the 18 cross-sectional studies, 12 studies had 100% of the quality items clearly met,<sup>12 13 29 31-34 39 42-45</sup> and six studies had at least 50% of the quality items clearly met,<sup>28 30 35 36 38 41</sup> with four studies having one to two items unclear.<sup>28 30 35 38</sup> Of the three qualitative studies, two studies had 70%,<sup>14 47</sup> and one study had 80%<sup>48</sup> of the quality items clearly met.

### **Findings of meta-analysis**

All patient factors potentially associated with obesity assessments as predictors were considered in each quantitative study reviewed (Supplementary Table S3). Meta-analyses were conducted on each of the fourteen potential predictors identified which were reported in at least three studies each (Table 2). These were grouped as demographic characteristics (age, sex, race, deprivation index, and health insurance status), BMI category, smoking status, and comorbidities (number of comorbidities and individual comorbidities such as cardiovascular disease and diabetes). All except one study<sup>40</sup> contributed results to at least one of these predictors. All meta-analyses found very high heterogeneity between studies. More detailed descriptions appear below, and additional results are presented in the Supplementary (Supplementary Section S6).

**Table 2: Summary of meta-analyses which pooled the ratios of BMI assessment by patient groups.**

| Predictor               | Comparison                                         | No. of studies | Pooled risk ratio | I <sup>2</sup> , heterogeneity test p-value |
|-------------------------|----------------------------------------------------|----------------|-------------------|---------------------------------------------|
| <b>Demographics</b>     |                                                    |                |                   |                                             |
| Sex                     | Female vs. male (ref.)                             | 15             | 1.28 (1.10,1.50)  | 99.8%, p<0.001                              |
| Age                     | Closest to 65 years vs. closest to 30 years (ref.) | 12             | 0.90 (0.50,1.63)  | 100%, p<0.001                               |
| Race                    | Non-White vs. White (ref.)                         | 9              | 1.27 (1.03,1.57)  | 99.6%, p<0.001                              |
| Deprivation index       | Highest deprivation vs. least (ref.)               | 4              | 1.21 (1.18,1.24)  | 73.9%, p=0.009                              |
| <b>BMI category</b>     |                                                    |                |                   |                                             |
| BMI category            | Highest BMI vs. lowest BMI (ref.)                  | 8              | 1.55 (0.99,2.45)  | 99.6%, p<0.001                              |
| <b>Smoking status</b>   |                                                    |                |                   |                                             |
| Smoking status          | Current smoker vs. never smoker (ref.)             | 3              | 1.01 (0.90,1.14)  | 98.3%, p<0.001                              |
| <b>Comorbidities</b>    |                                                    |                |                   |                                             |
| Number of comorbidities | Most vs. fewest (ref.)                             | 10             | 2.11 (1.60,2.79)  | 99.6%, p<0.001                              |
| Cardiovascular disease  | Present vs. absent (ref.)                          | 7              | 0.94 (0.81,1.10)  | 98.0%, p<0.001                              |
| Diabetes                | Present vs. absent (ref.)                          | 9              | 1.19 (0.93,1.52)  | 99.0%, p<0.001                              |
| Dyslipidaemia           | Present vs. absent (ref.)                          | 6              | 1.12 (0.92,1.37)  | 99.5%, p<0.001                              |
| Hypertension            | Present vs. absent (ref.)                          | 10             | 1.17 (0.98,1.40)  | 99.5%, p<0.001                              |
| Mental illness          | Present vs. absent (ref.)                          | 3              | 1.16 (0.79,1.70)  | 99.6%, p<0.001                              |
| Depression              | Present vs. absent (ref.)                          | 3              | 1.22 (0.85,1.74)  | 98.7%, p<0.001                              |

## Demographics

Despite the high levels of heterogeneity between studies, the pooled results suggested that female sex, non-White race, and socio-economic deprivation were associated with statistically significant increases in the rate of BMI assessment of 1.2- to 1.3-fold, and there was no statistically significant evidence of reporting bias (Supplementary Section S6.1-3). There was no evidence of such differences in BMI assessment rates between younger and older age groups.

There was statistically significant evidence of increased assessment of BMI among females among studies from the UK and US but not Australia (Fig. 2). As would be expected, the pooled OR (11 studies, OR 1.45, 95% CI 1.21,1.74, I<sup>2</sup> 99.5%) were higher than pooled other risk ratios (four studies, RR 1.18, 95% CI 1.04,1.35, I<sup>2</sup> 99.7%) (Supplementary Section S6, Table S6.1). For all other predictors, there were insufficient studies reporting other risk ratios to allow further investigation of these subgroups. No other statistically significant results arose during the subgroup analysis.

1  
2  
3 <<Figure 2>>  
4  
5  
6

7 In sensitivity analysis, restricting analysis to studies with the highest quality ratings yielded an increased  
8 pooled RR (10 studies, RR 1.45, 95% CI 1.21,1.74, I<sup>2</sup> 99.6%) for sex, but did not alleviate the heterogeneity  
9 between studies. The equivalent sensitivity analysis for age category also increased the size of the effect  
10 estimate, although still not statistically significant (nine studies, RR 0.69, 95% CI 0.19,2.48, I<sup>2</sup> 100%).  
11  
12  
13  
14  
15  
16  
17

### 18 **BMI and smoking status**

19  
20 All eight studies reporting results for BMI category found statistically significant effects, but the high  
21 heterogeneity yielded a wide CI and lack of statistical significance for the pooled RR (Fig. 3). Sensitivity  
22 analysis using only the studies with the highest quality rating produced a larger effect estimate for the  
23 difference between BMI assessment in the higher and lower BMI groups, but the high heterogeneity and lack  
24 of statistical significance remained (four studies, RR 2.56, 95% CI 0.45,14.6, I<sup>2</sup> 99.3%) (Supplementary  
25 Section S6, Table S6.6). There was no evidence of difference in BMI assessment between current and never  
26 smokers (three studies, RR 1.01, 95% CI 0.90,1.14, I<sup>2</sup> 98.2%) (Supplementary Section S6, Table S6.7).  
27  
28  
29  
30  
31  
32  
33  
34  
35  
36  
37  
38

39 <<Figure 3>>  
40  
41  
42  
43

### 44 **Comorbidities**

45  
46 Despite considerable heterogeneity in measures, methods, and outcomes (Supplementary Section S6, Table  
47 S6.8), all 10 studies found that those with the higher comorbidities were more likely to have a BMI assessment  
48 recorded, with these results being statistically significant in nine of the 10 studies (Fig. 4). Subgroup and  
49 sensitivity analyses showed that this association was broadly consistent across outcomes, countries, and study  
50 quality, with no visual or statistical evidence of publication bias (Supplementary Section S6, Table S6.8).  
51  
52  
53  
54  
55  
56  
57  
58  
59  
60

<<Figure 4>>

1  
2 Pooled ratio of BMI assessment for those with relative to those without each specific comorbidity produced  
3 quite uniform results (Supplementary Section S6, Table S6.8). None of the individual comorbidities had a  
4 statistically significant association with BMI assessment and all displayed very high heterogeneity between  
5 studies: cardiovascular disease (seven studies, RR 0.94, 95% CI 0.81,1.10, I<sup>2</sup> 98.0%), diabetes (nine studies,  
6 RR 1.19, 95% CI 0.93,1.51, I<sup>2</sup> 99.0%), dyslipidaemia (six studies, RR 1.12, 95% CI 0.92,1.37, I<sup>2</sup> 99.5%),  
7 hypertension (10 studies, RR 1.17, 95% CI 0.98,1.40, I<sup>2</sup> 99.5%), mental illness (three studies, RR 1.16, 95%  
8 CI 0.79,1.70, I<sup>2</sup> 99.6%), and depression (three studies, RR 1.22, 95% CI 0.85,1.74, I<sup>2</sup> 98.7%). However,  
9 subgroup analyses found that studies from Australia, unlike those from the UK and US, had statistically  
10 significantly higher BMI assessment for those with comorbidities with lower heterogeneity: diabetes (three  
11 studies, RR 1.84, 95% CI 1.75,1.93, I<sup>2</sup> 0%); dyslipidaemia (three studies, RR 1.21, 95% CI 1.08,1.36, I<sup>2</sup>  
12 80.6%); and hypertension (three studies, RR 1.15, 95% CI 1.05,1.26, I<sup>2</sup> 69.4%). Sensitivity analyses,  
13 restricting pooling to studies with the higher quality ratings, gave statistically significant evidence of the  
14 association between the comorbidity and BMI assessment in dyslipidaemia (four studies, RR 1.21, 95% CI  
15 1.15,1.28, I<sup>2</sup> 57.3%) and hypertension (eight studies, RR 1.26, 95% CI 1.10,1.43, I<sup>2</sup> 97.7%).  
16  
17  
18  
19  
20  
21  
22  
23  
24  
25  
26  
27  
28  
29  
30  
31  
32  
33  
34  
35  
36

### 37 Findings of thematic analysis

38  
39 Three themes were established from our thematic analysis of the qualitative studies: *personnel*, *resources*,  
40 and *systemic factors*.  
41  
42  
43  
44  
45

#### 46 Personnel

47  
48 The theme of *personnel* factors focused on two sub-themes: *roles and responsibilities* and *communications*  
49 and *discomfort*. While nurse participants believed that weight assessment and management was part of their  
50 professional role, there was ambiguity about this among the medical participants. One GP noted “*I don’t want*  
51 *to be weighing people every week. I don’t think that’s my role. I think it’s also not a good use of our expertise*  
52 *as generalist doctors. I think we’ve got other things that we could be doing*”,<sup>47</sup> (p. 7). There were variable  
53 views among GPs about their role in obesity prevention. The GPs asserted that patients should retain  
54  
55  
56  
57  
58  
59  
60



responsibility for their weight unless they have weight related health issues: *“Patients need to take some responsibility themselves. And if they know that they're carrying a bit of extra weight, they don't need to see a GP necessarily”*,<sup>47</sup> (p. 7): *“I have a responsibility to make them aware that (their weight) is an issue where it's clearly impacting on their (health). Do I have a responsibility to assist them with that? If they are looking for that assistance. I would have a responsibility to assist them or signpost them to what can assist them”*,<sup>47</sup> (p. 7). This finding was aligned with another study which found that weight related measurements were only undertaken if part of routine practice.<sup>48</sup> Although GPs and nurses perceived that patients lacked understanding of the health risks associated with increasing waist size, and that WC measurement could motivate patients to make healthy lifestyle changes, they did not routinely carry out this assessment.<sup>14</sup>

Our thematic analysis highlighted a second sub-theme in relation to *personnel factors* namely: *communications and discomfort*. Primary care practitioners perceived that patients might feel uncomfortable or embarrassed about having their WC measured.<sup>14</sup> Others expressed a preference for discussing weight with the patient within the context of existing, and possibly weight related, health issues:<sup>47</sup> *“So, I have to say that I tend only to (raise weight for discussion) if I see it as relevant to the problem that they've got”*,<sup>47</sup> (p. 7). They also thought that measuring waist might cause patient discomfort, particularly given the intimate nature of WC measurements,<sup>14 48</sup> as a practice nurse highlighted: *“It's personal to go up and start putting your arms around a patient”*,<sup>14</sup> (p. 365). The need to consider cultural sensitivities was also reported: *“Depends on the individual circumstances. Some patients don't care, but if you're a Muslim woman and very strict about it you wouldn't want anybody other than a woman touching you, so it depends on your individual ethnic preferences and your personal preferences as well”*,<sup>14</sup> (p. 368). This was further reinforced when primary care providers reported their own discomfort when measuring a person's WC, more so, a person of a different gender to themselves: *“five providers shared that obtaining a WCM was “uncomfortable,” particularly if the patient was “large” and/or the opposite gender of the provider”*,<sup>48</sup> (p. 686).

## Resources

1 The theme of *resources* included sub-themes associated with *time, equipment, costs, knowledge and training*.  
2  
3 All three qualitative studies referred to the challenges of time for appointments and consultations. One health  
4 care practitioner stated: “*You don’t just take the measurement, you have to explain what it means so in itself*  
5 *it doesn’t take a moment does it, but then you’ve got quite a good length of topic of conversation to explain*  
6 *it”*,<sup>14</sup> (p. 368). Limited availability of equipment such as tape measures<sup>48</sup> and lack of specific training on  
7 correct measuring technique<sup>14</sup> were other barriers to primary care practitioners for undertaking WC  
8 measurements. However, it was noted that “*the degree to which HCPs (health care professionals) felt*  
9 *comfortable about WCM (WC measurement) appeared to be positively related to the increased experience of*  
10 *measuring waist size and to routine rather than ad hoc use of this measurement and negatively associated*  
11 *with patients being overweight or obese”*,<sup>14</sup> (p. 369), despite health care professionals noting that they had not  
12 received specific training related to implementing WC measurements.<sup>14</sup> An additional barrier to obesity  
13 related anthropometric assessments could be that primary care practitioners question the evidence-base for  
14 recommended weight management interventions by clinical guidelines: “*If someone’s got obesity, I’m kind of*  
15 *stuck. I can give them advice on what to do but I don’t feel in many cases, that’s terribly helpful or terribly*  
16 *effective”*,<sup>47</sup> (p. 7).

### 37 **Systemic factors**

38  
39 Two studies found *systemic factors* as barriers to undertaking WC measurements.<sup>14 47</sup> One study highlighted  
40 the limited human and financial resources offered to primary care services.<sup>47</sup> Another referred to the need for  
41 greater organisational incentives for undertaking WC measurements.<sup>14</sup> Similarly, one primary care practitioner  
42 noted that the National Health Service contracts in the UK did not “*prioritise or incentivise*” weight  
43 management within primary care settings.<sup>47</sup> However, finance related issues were not the only systemic factors  
44 highlighted. There were concerns about restrictive eligibility criteria for referring to specialised weight  
45 management services as summarised: “*There was despondency among PCPs that they had nowhere to refer*  
46 *overweight patients when weight was not (yet) impacting on their health, and even when patients had clinical*  
47 *weight issues, they were not eligible for some specialist care”*,<sup>47</sup> (p. 6). While findings were mainly related to  
48  
49  
50  
51  
52  
53  
54  
55  
56  
57  
58  
59  
60

1 service level issues, primary care practitioners argued that the inclusion of WC measurement within both  
2 quality and outcome frameworks could incentivize clinical practice.<sup>14</sup>  
3  
4  
5

## 7 **DISCUSSION**

8  
9 We are the first authors to have systematically reviewed, synthesized, and integrated the published evidence  
10 from quantitative and qualitative studies on the enablers and barriers to implementing obesity related  
11 anthropometric assessments in clinical practice. Our evidence synthesis revealed several important enablers  
12 and barriers to obesity assessments that could inform health care professionals and relevant stakeholders such  
13 as academic institutions, professional bodies, and regulatory agencies.  
14  
15  
16  
17  
18  
19  
20  
21  
22

### 23 **Enablers**

24  
25 We found evidence from our meta-analysis indicating that an obesity assessment is most likely for patients  
26 with weight related complications ('comorbidities'). This finding was broadly consistent across countries and  
27 slightly strengthened among high quality studies (including for 'dyslipidaemia' and 'hypertension').  
28 Similarly, the presence of 'obesity-related comorbidities' is reportedly one of the principal reasons cited by  
29 health care professionals for initiating weight management discussions<sup>49</sup>. Although highly variable, we also  
30 found evidence to suggest that BMI assessment ('recording') was most likely among patients with the highest  
31 BMI. Overall, the results of our meta-analyses suggest that both excess weight and weight related  
32 complications encourage health care professionals to conduct obesity assessments in high-risk patients.  
33  
34  
35  
36  
37  
38  
39  
40  
41  
42  
43  
44  
45

46 Convergent with this hypothesis, the findings of our thematic analysis revealed positive views among health  
47 care professionals about obesity assessments if they suspected that their patient's excess weight was negatively  
48 impacting on their health.<sup>47</sup> Health care professionals also expressed positive views about obesity assessments  
49 if part of routine practice,<sup>48</sup> and because they could motivate patients to make healthy lifestyle changes.<sup>14</sup>  
50 Indeed, frequent self-weighing is associated with favourable weight loss, particularly among those with excess  
51 weight.<sup>50</sup> This is consistent with findings of a recent systematic review of qualitative studies in which health  
52  
53  
54  
55  
56  
57  
58  
59  
60

1 care professionals expressed positive views on the usefulness of routine BMI assessment at every consultation  
2 alongside a treatment framework for discussing weight management with patients in primary care.<sup>51</sup>  
3  
4  
5  
6

7 Findings from our meta-analyses also revealed evidence that obesity assessment was most likely for patients  
8 with socio-economic deprivation in the UK, patients of ‘non-White’ race/ethnicity in the UK and US, and for  
9 female patients, particularly in the UK and US. These results are likely partially explained by increasing  
10 obesity<sup>52</sup> and higher clinical encounter rates with socio-economic disadvantage groupings,<sup>53</sup> health care  
11 professionals being more verbally dominant towards non-White than White patients,<sup>54</sup> and a higher prevalence  
12 of severe obesity among women than men,<sup>55</sup> respectively, in high income countries. Health care professionals  
13 should be aware of these potential biases to ensure that they conduct routine obesity assessments in all high-  
14 risk patients regardless of their socio-economic status, race/ethnicity, and sex.  
15  
16  
17  
18  
19  
20  
21  
22  
23  
24  
25  
26  
27

## 28 **Barriers**

29  
30 Our thematic analysis revealed negative attitudes among health care professionals about patients with obesity  
31 and their role in obesity assessment and weight management, generally. They expressed views that patients,  
32 rather than health care professionals, should retain responsibility for, and lacked motivation to, address their  
33 weight issues.<sup>47</sup> Health care professionals expressed doubts about their patients’ understanding of health risks  
34 associated with the results of obesity assessments.<sup>14</sup> Overall, these findings suggest that weight stigma among  
35 health care professionals is a barrier to obesity assessments.  
36  
37  
38  
39  
40  
41  
42  
43  
44  
45

46 We found evidence that health care professionals expressed negative views about adequate training and  
47 equipment for obesity assessments.<sup>14 47 48</sup> They expressed negative views on limited access to specialist weight  
48 management services and the evidence-base for treatments,<sup>47</sup> as required after an obesity assessment and  
49 diagnosis.<sup>3</sup> There were expressions of discomfort about obtaining obesity assessments for patients of the  
50 opposite sex,<sup>48</sup> which is consistent with previous research showing that patients often preferred to see a health  
51 care professional of the same-sex.<sup>56</sup> Convergent with findings from our meta-analyses for patients with weight  
52 related complications, health care professionals expressed apprehension to discuss weight in the absence of  
53  
54  
55  
56  
57  
58  
59  
60

1 suspected health issues.<sup>47</sup> A recently validated brief diagnostic screening tool (EOSS-2 Risk Tool) for  
2 predicting weight related complications in patients with excess weight could provide health care professionals  
3 with a structured framework for further investigations including obesity assessments.<sup>57</sup> Finally, health care  
4 professionals expressed lack of time,<sup>14 47 48</sup> increased financial cost implications,<sup>14</sup> and lack of incentives in  
5 the health system<sup>14 47</sup> as additional resource and systematic barriers to obesity assessment. Collectively, these  
6 findings strengthen the urgency for implementing recommendations to incorporate “formal teaching on the  
7 causes, mechanisms, and treatments of obesity” into standard curricula for health care professionals by  
8 academic institutions, professional bodies, and regulatory agencies.<sup>58</sup> It would encourage better adherence to  
9 clinical practice guideline recommendations that BMI and WC measurements should be used for routine  
10 diagnosis and monitoring.<sup>3 10</sup>

## 25 **Limitations**

26 The applicability of our findings to encourage better adherence to clinical practice guideline recommendations  
27 is limited because results from meta-analyses were based on observational studies and slightly weakened or  
28 inconclusive for some patient factors, whereas only a small number of qualitative studies were reviewed.  
29 Furthermore, we might have missed relevant studies for inclusion by using a streamlined rapid systematic  
30 review approach.

## 41 **Conclusion**

42 The key findings of our mixed methods systematic review indicate that obesity related anthropometric  
43 assessment in clinical practice is positively associated with weight related complications, socio-economic  
44 deprivation, ‘non-White’ race/ethnicity, and female sex among patients. Views of health care professionals  
45 were positive about obesity assessments when linked to patient health and if part of routine practice, but  
46 negative about their role, training, time, resources, and incentives in the health care system. To encourage  
47 better adherence to clinical practice guideline recommendations, high income countries should consider  
48 incorporating formal teaching of obesity medicine into their academic institutions, professional bodies, and  
49

1 regulatory agencies. Future research for developing and testing interventions should consider the enablers and  
2 barriers to obesity assessments identified in this study.  
3  
4  
5

## 6 **Competing Interests**

7  
8  
9 EA was the Founding President, and now serves as the Secretary, of the National Association of Clinical  
10 Obesity Services (NACOS). He has received honoraria from Novo Nordisk for speaking and participating at  
11 meetings. He has received unrestricted research funding from Novo Nordisk and iNova on behalf of NACOS.  
12  
13  
14 RC and CNS have received payments for their contributions through casual employment contracts at Western  
15 Sydney University. PF, KP, GM, BC, and DL declare no competing financial interests.  
16  
17  
18  
19  
20  
21  
22

## 23 **Funding**

24  
25 This pilot work was partially supported by grants from iNova Pharmaceuticals (Australia) Pty Ltd  
26 (<https://inovapharma.com/>), in partnership with the National Association of Clinical Obesity Services  
27 Incorporated (<https://www.nacos.org.au/>) and Western Sydney University  
28 (<https://www.westernsydney.edu.au/>) (P00026836). The funders had no role in study design, data collection  
29 and analysis, decision to publish, or preparation of the manuscript.  
30  
31  
32  
33  
34  
35  
36  
37  
38

## 39 **Author Contributions:**

40  
41 EA and RC were responsible for designing the review protocol, writing the protocol and report, conducting  
42 the search, screening potentially eligible studies, extracting data, interpreting results, conducting risk of bias  
43 assessments, and updating reference lists. CNS was responsible for conducting the search, screening  
44 potentially eligible studies, extracting data, interpreting results, updating reference lists, and writing the  
45 Supplementary. KP and GM were responsible for designing the review thematic analysis protocol, screening  
46 potentially eligible studies, extracting qualitative data, interpreting results, and updating reference lists. BC  
47 was responsible for developing and conducting the search strategy. DL contributed to the design of the review  
48 protocol, writing the report, arbitrating potentially eligible studies, conducting risk of bias assessments, and  
49 interpreting results. PPF was responsible for the meta-analyses including extracting, analysing, writing, and  
50  
51  
52  
53  
54  
55  
56  
57  
58  
59  
60

1 interpreting the results from quantitative data, screening potentially eligible studies, and contributed to writing  
2 the results and Supplementary.  
3

4  
5  
6  
7 **Data Availability Statement:**  
8

9 Not applicable.  
10  
11  
12

13  
14 **Registration and Protocol Statement:**  
15

16 Our protocol had been submitted for registration in the International Prospective Register of Systematic  
17 Reviews, hosted by the Centre for Reviews and Dissemination (PROSPERO), but was deemed ineligible  
18 because we had already started extracting data before it was submitted (RECORD 301742). The submitted  
19 protocol to PROSPERO is available on request.  
20  
21  
22  
23  
24  
25  
26  
27

28 **Availability of Study Materials Statement:**  
29

30 All materials used in this study such as templates for data extraction and risk of bias assessments are available  
31 on request.  
32  
33  
34  
35  
36

37 **Ethics Approval Statement:**  
38

39 Not applicable.  
40  
41  
42  
43

44 **Patient and Public Involvement Statement:**  
45

46 This rapid systematic review did not involve patients and the public in the protocol development.  
47  
48  
49

50  
51 **References:**  
52

53 1. World Health Organization. Obesity and overweight: © 2021 WHO; 2021 [Available from:

54 <https://www.who.int/news-room/fact-sheets/detail/obesity-and-overweight> accessed 14 October

55  
56  
57 2021.  
58  
59  
60

- 1  
2  
3  
4  
5  
6  
7  
8  
9  
10  
11  
12  
13  
14  
15  
16  
17  
18  
19  
20  
21  
22  
23  
24  
25  
26  
27  
28  
29  
30  
31  
32  
33  
34  
35  
36  
37  
38  
39  
40  
41  
42  
43  
44  
45  
46  
47  
48  
49  
50  
51  
52  
53  
54  
55  
56  
57  
58  
59  
60
2. Wolfenden L, Ezzati M, Larijani B, et al. The challenge for global health systems in preventing and managing obesity. *Obes Rev* 2019;20 Suppl 2:185-93. doi: 10.1111/obr.12872 [published Online First: 2019/07/19]
3. Semlitsch T, Stigler FL, Jeitler K, et al. Management of overweight and obesity in primary care-A systematic overview of international evidence-based guidelines. *Obes Rev* 2019;20(9):1218-30. doi: 10.1111/obr.12889 [published Online First: 2019/07/10]
4. Caterson ID, Alfadda AA, Auerbach P, et al. Gaps to bridge: Misalignment between perception, reality and actions in obesity. *Diabetes, Obesity and Metabolism* 2019;21(8):1914-24. doi: 10.1111/dom.13752
5. Nordmo M, Danielsen YS, Nordmo M. The challenge of keeping it off, a descriptive systematic review of high-quality, follow-up studies of obesity treatments. *Obes Rev* 2020;21(1):e12949. doi: 10.1111/obr.12949 [published Online First: 2019/11/02]
6. Cefalu WT, Bray GA, Home PD, et al. Advances in the Science, Treatment, and Prevention of the Disease of Obesity: Reflections From a Diabetes Care Editors' Expert Forum. *Diabetes Care* 2015;38(8):1567-82. doi: 10.2337/dc15-1081 [published Online First: 2015/10/01]
7. Bray GA, Fruhbeck G, Ryan DH, et al. Management of obesity. *Lancet* 2016;387(10031):1947-56. doi: 10.1016/S0140-6736(16)00271-3 [published Online First: 2016/02/13]
8. PwC. Weighing the cost of obesity: A case for action. Available at: <https://www.pwc.com.au/pdf/weighing-the-cost-of-obesity-final.pdf>. 2015
9. Atlantis E, Kormas N, Samaras K, et al. Clinical Obesity Services in Public Hospitals in Australia: a position statement based on expert consensus. *Clin Obes* 2018;8(3):203-10. doi: 10.1111/cob.12249 [published Online First: 2018/04/24]
10. Ramachandran D, Atlantis E, Markovic T, et al. Standard baseline data collections in obesity management clinics: A Delphi study with recommendations from an expert panel. *Clin Obes* 2019;9(3):e12301. doi: 10.1111/cob.12301 [published Online First: 2019/02/15]



- 1 11. Nicholson BD, Aveyard P, Bankhead CR, et al. Determinants and extent of weight recording in UK  
2 primary care: an analysis of 5 million adults' electronic health records from 2000 to 2017. *BMC*  
3 *Medicine* 2019;17(1):222-22. doi: 10.1186/s12916-019-1446-y  
4  
5  
6
- 7 12. Turner LR, Harris MF, Mazza D. Obesity management in general practice: does current practice match  
8 guideline recommendations? *Medical Journal of Australia* 2015;202(7):370-+. doi:  
9  
10 10.5694/mja14.00998  
11  
12
- 13 13. Verberne LDM, Nielen MMJ, Leemrijse CJ, et al. Recording of weight in electronic health records: an  
14 observational study in general practice. *BMC Fam Pract* 2018;19(1):174. doi: 10.1186/s12875-018-  
15 0863-x [published Online First: 2018/11/19]  
16  
17  
18
- 19 14. Dunkley AJ, Stone MA, Patel N, et al. Waist circumference measurement: knowledge, attitudes and  
20 barriers in patients and practitioners in a multi-ethnic population. *Family Practice* 2009;26(5):365-  
21 71. doi: <https://dx.doi.org/10.1093/fampra/cmp048>  
22  
23  
24  
25
- 26 15. Hong QN, Pluye P, Bujold M, et al. Convergent and sequential synthesis designs: implications for  
27 conducting and reporting systematic reviews of qualitative and quantitative evidence. *Syst Rev*  
28 2017;6:61. doi: 10.1186/s13643-017-0454-2  
29  
30  
31  
32
- 33 16. Noyes J, Booth A, Moore G, et al. Synthesising quantitative and qualitative evidence to inform  
34 guidelines on complex interventions: clarifying the purposes, designs and outlining some methods.  
35 *BMJ Glob Health* 2019;4:e000893. doi: 10.1136/bmjgh-2018-000893  
36  
37  
38  
39
- 40 17. Tricco AC, Antony J, Zarin W, et al. A scoping review of rapid review methods. *BMC Med*  
41 2015;13:224. doi: 10.1186/s12916-015-0465-6 [published Online First: 2015/09/18]  
42  
43  
44  
45
- 46 18. University of York, Centre for Reviews Dissemination, Akers J. *Systematic Reviews: CRD's Guidance*  
47 *for Undertaking Reviews in Health Care*. Layerthorpe, York: Centre for Reviews and Dissemination,  
48 University of York 2009.  
49  
50  
51  
52
- 53 19. Lizarondo L, Stern C, Carrier J, et al. Chapter 8: Mixed Methods Systematic Reviews. In: Aromataris E,  
54 Munn Z, eds. *JBIM Manual for Evidence Synthesis*: JBI 2020.  
55  
56  
57  
58  
59  
60

- 1  
2  
3  
4  
5  
6  
7  
8  
9  
10  
11  
12  
13  
14  
15  
16  
17  
18  
19  
20  
21  
22  
23  
24  
25  
26  
27  
28  
29  
30  
31  
32  
33  
34  
35  
36  
37  
38  
39  
40  
41  
42  
43  
44  
45  
46  
47  
48  
49  
50  
51  
52  
53  
54  
55  
56  
57  
58  
59  
60
20. Moher D, Shamseer L, Clarke M, et al. Preferred reporting items for systematic review and meta-analysis protocols (PRISMA-P) 2015 statement. *Syst Rev* 2015;4:1. doi: 10.1186/2046-4053-4-1 [published Online First: 2015/01/03]
  21. Schardt C, Adams MB, Owens T, et al. Utilization of the PICO framework to improve searching PubMed for clinical questions. *BMC Med Inform Decis Mak* 2007;7:16. doi: 10.1186/1472-6947-7-16 [published Online First: 2007/06/19]
  22. JBI. Critical Appraisal Checklist for Systematic Reviews and Research Syntheses 2020 [Available from: <https://jbi.global/critical-appraisal-tools>].
  23. 2001-2021 RL. VassarStats: Website for Statistical Computation [Available from: <http://vassarstats.net/odds2x2.html>].
  24. Borenstein M, Hedges LV, Higgins JPT, et al. Introduction to Meta-Analysis: Wiley 2021.
  25. Doi SA, Barendregt JJ, Khan S, et al. Advances in the meta-analysis of heterogeneous clinical trials I: The inverse variance heterogeneity model. *Contemp Clin Trials* 2015;45(Pt A):130-8. doi: 10.1016/j.cct.2015.05.009 [published Online First: 2015/05/25]
  26. Cochrane Handbook for Systematic Reviews of Interventions. In: Julian Higgins JT, ed. Version 6.2, 2021 ed: Copyright © 2022 The Cochrane Collaboration, 2022.
  27. Braun V, Clarke V. Reflecting on reflexive thematic analysis. *Qualitative Research in Sport, Exercise and Health* 2019;11(4):589-97. doi: 10.1080/2159676X.2019.1628806
  28. Ruser CB, Sanders L, Brescia GR, et al. Identification and management of overweight and obesity by internal medicine residents. *Journal of General Internal Medicine* 2005;20(12):1139-41.
  29. Melamed OC, Nakar S, Vinker S. Suboptimal identification of obesity by family physicians. *American Journal of Managed Care* 2009;15(9):619-24.
  30. Gutierrez Angulo ML, Amenabar Azurmendi MD, Cuesta Sole ML, et al. Prevalence of obesity recorded in Primary Care. *Endocrinologia y Nutricion* 2014;61(9):469-73. doi: <https://dx.doi.org/10.1016/j.endonu.2014.03.012>

- 1 31. Bleich SN, Pickett-Blakely O, Cooper LA, et al. Physician practice patterns of obesity diagnosis and  
2 weight-related counseling. *Patient Education & Counseling* 2011;82(1):123-29. doi:  
3  
4 10.1016/j.pec.2010.02.018  
5  
6
- 7 32. Cyr PR, Haskins AE, Holt C, et al. Weighty Problems: Predictors of Family Physicians Documenting  
8  
9 Overweight and Obesity. *Family Medicine* 2016;48(3):217-21.  
10  
11
- 12 33. Gonzalez-Chica DA, Bowden J, Miller C, et al. Patient-reported GP health assessments rather than  
13  
14 individual cardiovascular risk burden are associated with the engagement in lifestyle changes:  
15  
16 population-based survey in South Australia. *BMC Family Practice* 2019;20(1):1-10. doi:  
17  
18 10.1186/s12875-019-1066-9  
19  
20
- 21 34. Mattar A, Carlston D, Sariol G, et al. The prevalence of obesity documentation in Primary Care  
22  
23 Electronic Medical Records. Are we acknowledging the problem? *Applied Clinical Informatics*  
24  
25 2017;8(1):67-79. doi: <https://dx.doi.org/10.4338/ACI-2016-07-RA-0115>  
26  
27
- 28 35. Yoong SL, Carey ML, Sanson-Fisher RW, et al. A cross-sectional study examining Australian general  
29  
30 practitioners' identification of overweight and obese patients. *JGIM: Journal of General Internal*  
31  
32 *Medicine* 2014;29(2):328-34. doi: 10.1007/s11606-013-2637-4  
33  
34
- 35 36. Aleem S, Lasky R, Brooks WB, et al. Obesity perceptions and documentation among primary care  
36  
37 clinicians at a rural academic health center. *Obesity Research and Clinical Practice* 2015;9(4):408-  
38  
39 15. doi: <http://dx.doi.org/10.1016/j.orcp.2015.08.014>  
40  
41
- 42 37. Booth HP, Prevost AT, Gulliford MC. Epidemiology of clinical body mass index recording in an obese  
43  
44 population in primary care: a cohort study. *Journal of Public Health* 2013;35(1):67-74. doi:  
45  
46 pubmed/fds063  
47  
48
- 49 38. Bramlage P, Wittchen HU, Pittrow D, et al. Recognition and management of overweight and obesity in  
50  
51 primary care in Germany. *Int J Obes Relat Metab Disord* 2004;28(10):1299-308.  
52
- 53 39. Dalton ARH, Bottle A, Okoro C, et al. Implementation of the NHS Health Checks programme: baseline  
54  
55 assessment of risk factor recording in an urban culturally diverse setting. *Fam Pract* 2011;28(1):34-  
56  
57 40. doi: 10.1093/fampra/cmq068  
58  
59  
60

- 1  
2  
3  
4  
5  
6  
7  
8  
9  
10  
11  
12  
13  
14  
15  
16  
17  
18  
19  
20  
21  
22  
23  
24  
25  
26  
27  
28  
29  
30  
31  
32  
33  
34  
35  
36  
37  
38  
39  
40  
41  
42  
43  
44  
45  
46  
47  
48  
49  
50  
51  
52  
53  
54  
55  
56  
57  
58  
59  
60
40. Emanuel G, Charlton J, Ashworth M, et al. Cardiovascular risk assessment and treatment in chronic inflammatory disorders in primary care. *Heart* 2016;102(24):1957-62. doi: <https://dx.doi.org/10.1136/heartjnl-2016-310111>
41. Rose SA, Turchin A, Grant RW, et al. Documentation of body mass index and control of associated risk factors in a large primary care network. *BMC Health Services Research* 2009;9(1):236. doi: 10.1186/1472-6963-9-236
42. Baer HJ, Karson AS, Soukup JR, et al. Documentation and diagnosis of overweight and obesity in electronic health records of adult primary care patients. *JAMA Internal Medicine* 2013;173(17):1648-52. doi: 10.1001/jamainternmed.2013.7815
43. Cuccu Z, Abi-Aad G, Duggal A. Characteristics of patients with body mass index recorded within the Kent Integrated Dataset (KID). *BMJ health & care informatics* 2019;26(1) doi: <http://dx.doi.org/10.1136/bmjhci-2019-000026>
44. Ghosh A. Depressed, anxious and breathless missing out: Weight screening in general practice in a regional catchment of New South Wales. *Australian Journal of Rural Health* 2016;24(4):246-52. doi: 10.1111/ajr.12264
45. Mocarski M, Tian Y, Smolarz BG, et al. Use of International Classification of Diseases, Ninth Revision Codes for Obesity: Trends in the United States from an Electronic Health Record-Derived Database. *Population Health Management* 2018;21(3):222-30. doi: <https://dx.doi.org/10.1089/pop.2017.0092>
46. Osborn DPJ, Baio G, Walters K, et al. Inequalities in the provision of cardiovascular screening to people with severe mental illnesses in primary care Cohort study in the United Kingdom THIN Primary Care Database 2000—2007. *Schizophrenia research* 2011;129(2-3):104-10. doi: 10.1016/j.schres.2011.04.003
47. McHale CT, Laidlaw AH, Cecil JE. Primary care patient and practitioner views of weight and weight-related discussion: a mixed-methods study. *BMJ Open* 2020;10(3):(no pagination). doi: <https://dx.doi.org/10.1136/bmjopen-2019-034023>
48. Gaynor B, Habermann B, Wright R. Waist Circumference Measurement Diffusion in Primary Care. *Journal for nurse practitioners* 2018;14(9):683-88.e1. doi: 10.1016/j.nurpra.2018.06.002

- 1 49. Rigas G, Williams K, Sumithran P, et al. Delays in healthcare consultations about obesity - Barriers and  
2 implications. *Obes Res Clin Pract* 2020;14(5):487-90. doi: 10.1016/j.orcp.2020.08.003  
3
- 4 50. Vuorinen AL, Helander E, Pietila J, et al. Frequency of Self-Weighing and Weight Change: Cohort  
5 Study With 10,000 Smart Scale Users. *J Med Internet Res* 2021;23(6):e25529. doi: 10.2196/25529  
6  
7 [published Online First: 2021/06/03]  
8
- 9 51. Warr W, Aveyard P, Albury C, et al. A systematic review and thematic synthesis of qualitative studies  
10 exploring GPs' and nurses' perspectives on discussing weight with patients with overweight and  
11 obesity in primary care. *Obesity Reviews* 2021;22(4): (no pagination). doi:  
12  
13 <https://dx.doi.org/10.1111/obr.13151>  
14
- 15 52. Holmes J. Tackling obesity, 2021.  
16
- 17 53. Gordon J, Valenti L, Bayram C, et al. An analysis of general practice encounters by socioeconomic  
18 disadvantage. *Aust Fam Physician* 2016;45(10):702-05. [published Online First: 2016/10/04]  
19
- 20 54. Johnson RL, Roter D, Powe NR, et al. Patient race/ethnicity and quality of patient-physician  
21 communication during medical visits. *Am J Public Health* 2004;94(12):2084-90. doi:  
22  
23 10.2105/ajph.94.12.2084 [published Online First: 2004/12/01]  
24
- 25 55. Hales CM, Carroll MD, Fryar CD, et al. Prevalence of Obesity and Severe Obesity Among Adults:  
26 United States, 2017-2018. *NCHS Data Brief* 2020(360):1-8. [published Online First: 2020/06/04]  
27
- 28 56. Fink M, Klein K, Sayers K, et al. Objective Data Reveals Gender Preferences for Patients' Primary Care  
29 Physician. *J Prim Care Community Health* 2020;11:2150132720967221. doi:  
30  
31 10.1177/2150132720967221 [published Online First: 2020/10/29]  
32
- 33 57. Atlantis E, John JR, Fahey PP, et al. Clinical usefulness of brief screening tool for activating weight  
34 management discussions in primary cARE (AWARE): A nationwide mixed methods pilot study.  
35  
36 *PLoS One* 2021;16(10):e0259220. doi: 10.1371/journal.pone.0259220 [published Online First:  
37  
38 2021/10/29]  
39
- 40 58. Rubino F, Puhl RM, Cummings DE, et al. Joint international consensus statement for ending stigma of  
41 obesity. *Nat Med* 2020;26(4):485-97. doi: 10.1038/s41591-020-0803-x [published Online First:  
42  
43 2020/03/05]  
44
- 45  
46  
47  
48  
49  
50  
51  
52  
53  
54  
55  
56  
57  
58  
59  
60

1  
2  
3 **Figure Legends:**

4  
5 **Figure 1: Flow diagram of the study selection process**

6  
7 **Figure 2: Forest plot of risk ratios for BMI assessment associated with female relative to male sex**  
8  
9 **(reference) by country regions.**

10  
11  
12 **Figure 3: Forest plot of risk ratios for BMI assessment associated with highest relative to lowest**  
13  
14 **(reference) BMI category.**

15  
16 **Figure 4: Forest plot of risk ratios for BMI assessment associated with most relative to fewest (reference)**  
17  
18 **number of comorbidities groups.**

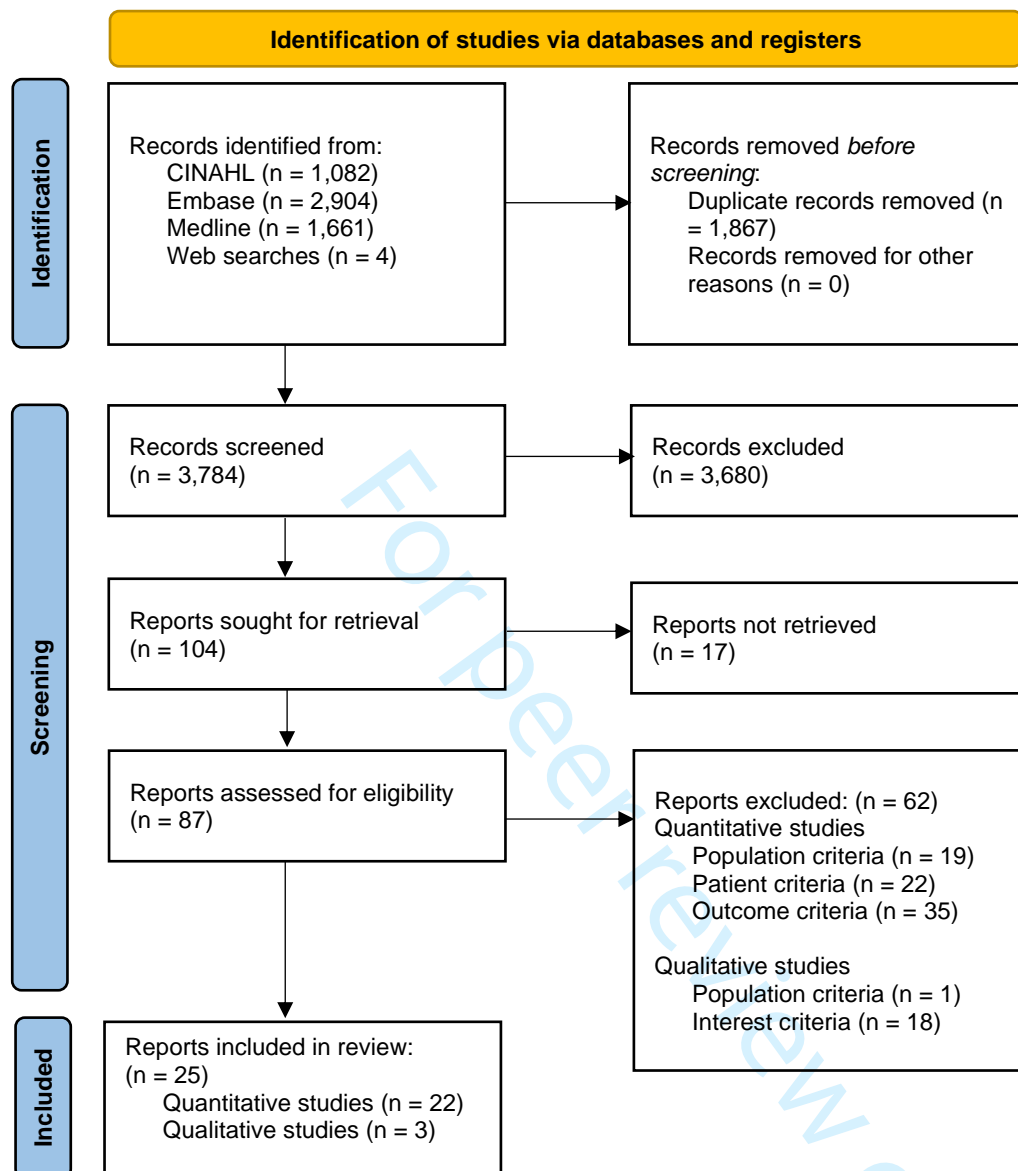

From: Page MJ, McKenzie JE, Bossuyt PM, Boutron I, Hoffmann TC, Mulrow CD, et al. The PRISMA 2020 statement: an updated guideline for reporting systematic reviews. *BMJ* 2021;372:n71. doi: 10.1136/bmj.n71

For more information, visit: <http://www.prisma-statement.org/>

1  
2  
3  
4  
5  
6  
7  
8  
9  
10  
11  
12  
13  
14  
15  
16  
17  
18  
19  
20  
21  
22  
23  
24  
25  
26  
27  
28  
29  
30  
31  
32  
33  
34  
35  
36  
37

**Author(s) and Year**

**Risk Ratio [95% CI]**

**Australia**

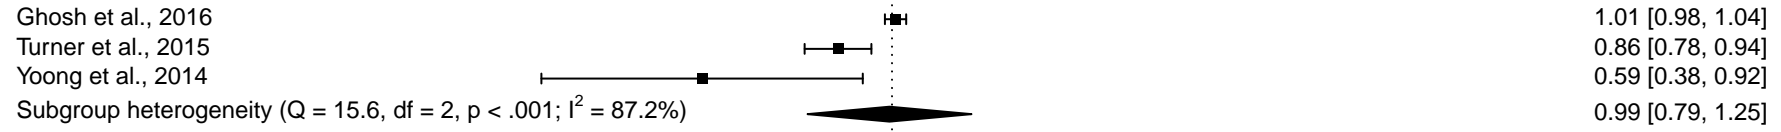

**Other**

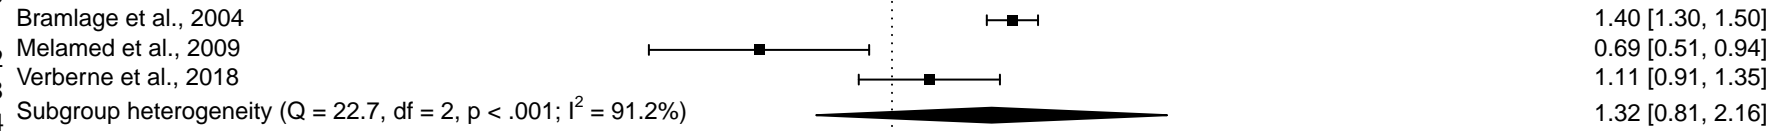

**UK**

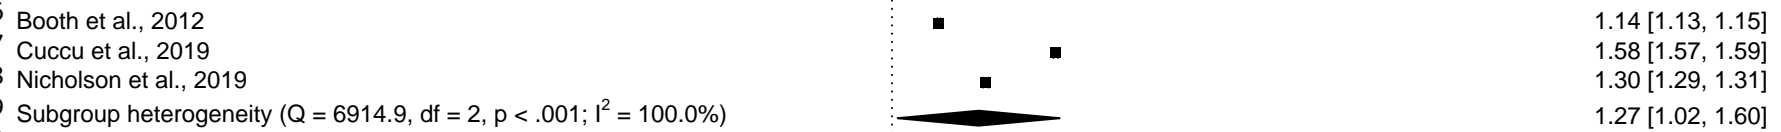

**USA**

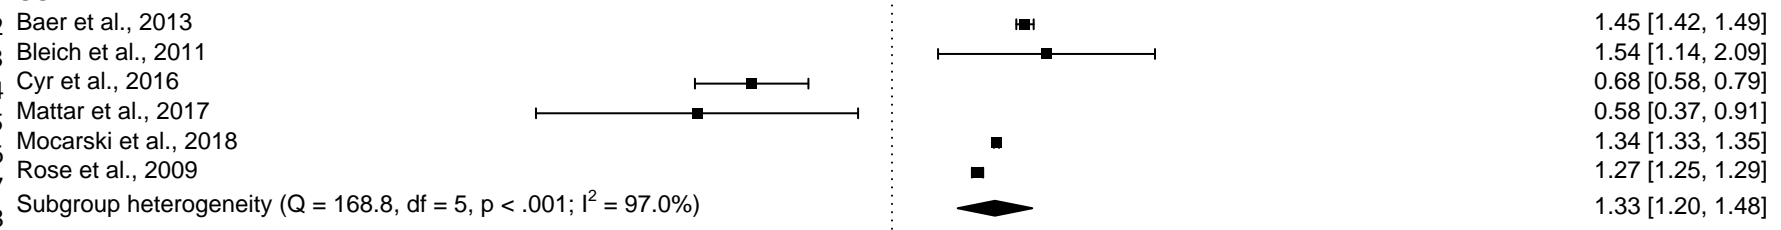

All Studies heterogeneity (Q = 7603.0, df = 14, p < .001; I² = 99.8%)

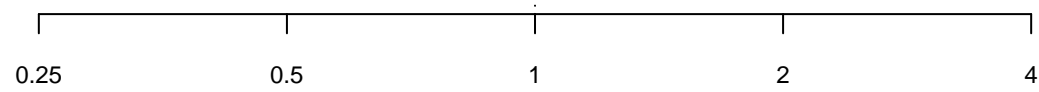



1  
2  
3  
4  
5  
6  
7  
8  
9  
10  
11  
12  
13  
14  
15  
16  
17  
18  
19  
20  
21  
22  
23  
24  
25  
26  
27  
28  
29  
30  
31  
32  
33  
34  
35  
36  
37

Author(s) and Year

Risk Ratio [95% CI]

Booth et al., 2012

1.19 [ 1.17, 1.21]

Cyr et al., 2016

24.78 [19.56, 31.40]

Mattar et al., 2017

1.60 [ 1.39, 1.84]

Melamed et al., 2009

2.04 [ 1.04, 4.00]

Nicholson et al., 2019

1.67 [ 1.66, 1.69]

Ruser et al., 2005

7.51 [ 3.76, 15.01]

Verberne et al., 2018

1.25 [ 1.01, 1.54]

Yoong et al., 2014

10.00 [ 5.92, 16.90]

Heterogeneity (Q = 1812.8, df = 7, p < .001; I<sup>2</sup> = 99.6%)

1.55 [ 0.99, 2.45]

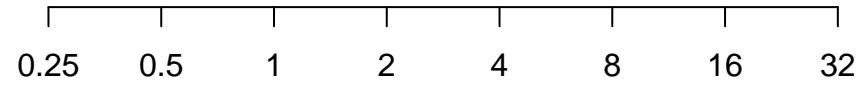

1  
2  
3  
4  
5  
6  
7  
8  
9  
10  
11  
12  
13  
14  
15  
16  
17  
18  
19  
20  
21  
22  
23  
24  
25  
26  
27  
28  
29  
30  
31  
32  
33  
34  
35  
36  
37

Author(s) and Year

Risk Ratio [95% CI]

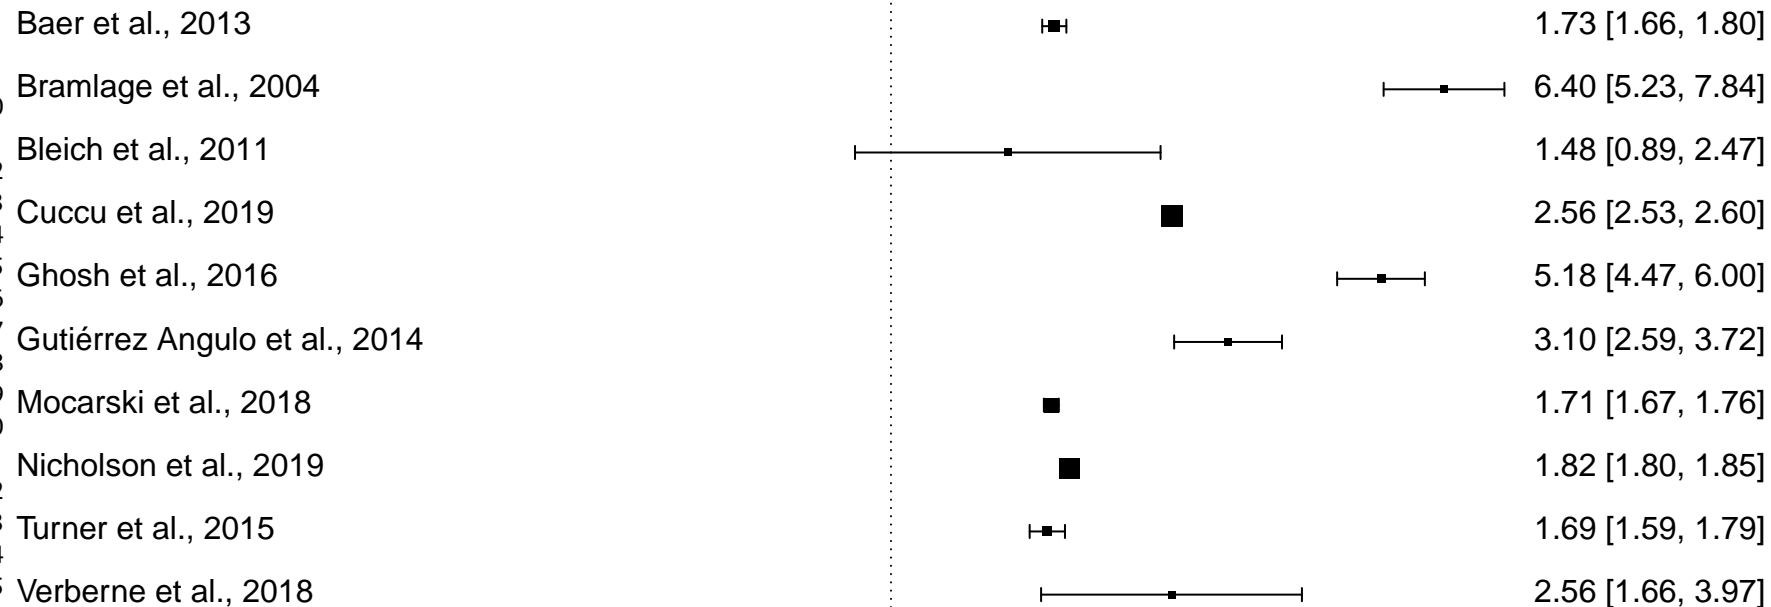

Heterogeneity (Q = 2042.8, df = 9, p < .001; I<sup>2</sup> = 99.6%)

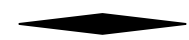

2.11 [1.60, 2.79]

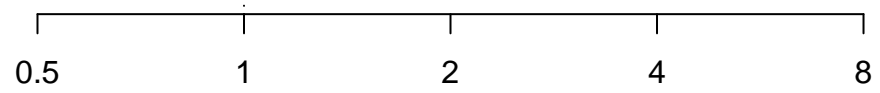

For peer review only - <http://bmjopen.bmj.com/site/about/guidelines.xhtml>  
Risk Ratio (log scale)

## Supplementary File

### Table of contents

|                                                                                            |    |
|--------------------------------------------------------------------------------------------|----|
| Supplementary Table S1: Search strategy .....                                              | 2  |
| Ovid MEDLINE(R) ALL <1946 to present>.....                                                 | 2  |
| Embase via OvidSP (1947 - present) .....                                                   | 5  |
| CINAHL via EBSCO .....                                                                     | 8  |
| Web searching .....                                                                        | 10 |
| Supplementary Table S2: List of excluded studies with reasons.....                         | 12 |
| Supplementary Table S3: Characteristics and summary of quantitative studies reviewed ..... | 13 |
| Supplementary Table S4: Characteristics and summary of qualitative studies reviewed .....  | 29 |
| Supplementary Table S5: Risk of bias assessment of studies reviewed.....                   | 33 |
| Supplementary Section S6: Summary of results from all meta-analyses .....                  | 36 |
| S6.1 Sex as a predictor of BMI assessment .....                                            | 36 |
| S6.2 Age as a predictor of BMI assessment.....                                             | 37 |
| S6.3 Race/ethnicity as a predictor of BMI assessment .....                                 | 39 |
| S6.4 Deprivation as a predictor of BMI assessment .....                                    | 42 |
| S6.5 Health insurance status as a predictor of BMI assessment .....                        | 43 |
| S6.6 BMI category as a predictor of BMI assessment .....                                   | 44 |
| S6.7 Smoking status as a predictor of BMI assessment.....                                  | 46 |
| S6.8 The number of comorbidities as a predictor of BMI assessment.....                     | 46 |
| S6.9 Cardiovascular disease as a predictor of BMI assessment.....                          | 48 |
| S6.10 Diabetes as a predictor of BMI assessment .....                                      | 50 |
| S6.11 Dyslipidaemia disease as a predictor of BMI assessment .....                         | 51 |
| S6.12 Hypertension as a predictor of BMI assessment.....                                   | 52 |
| S6.13 Mental illness as a predictor of BMI assessment.....                                 | 53 |
| S6.14 Depression as a predictor of BMI assessment .....                                    | 54 |
| Supplementary Table S7: References .....                                                   | 55 |

**Supplementary Table S1: Search strategy**

Ovid MEDLINE(R) ALL &lt;1946 to present&gt;

| #  | Query                                                                                                                                                             | Results from 25 <sup>th</sup> Sept. 2021 |
|----|-------------------------------------------------------------------------------------------------------------------------------------------------------------------|------------------------------------------|
| 1  | Primary Health Care/                                                                                                                                              | 85,205                                   |
| 2  | general practice/ or family practice/                                                                                                                             | 76,814                                   |
| 3  | (primary adj2 (care or health*)).tw.                                                                                                                              | 157,253                                  |
| 4  | ((general or family) adj (practice* or practitioner*)).tw.                                                                                                        | 93,468                                   |
| 5  | ((family or community or practice*) adj (medic* or doctor* or physician* or nurs*)).tw.                                                                           | 47,774                                   |
| 6  | 1 or 2 or 3 or 4 or 5                                                                                                                                             | 312,040                                  |
| 7  | obesity/ or obesity, abdominal/ or obesity, maternal/ or obesity, metabolically benign/ or obesity, morbid/                                                       | 221,007                                  |
| 8  | Overweight/                                                                                                                                                       | 28,308                                   |
| 9  | Overnutrition/                                                                                                                                                    | 623                                      |
| 10 | overnutrition.tw.                                                                                                                                                 | 1,652                                    |
| 11 | hypernutrition.tw.                                                                                                                                                | 44                                       |
| 12 | obes*.tw.                                                                                                                                                         | 330,756                                  |
| 13 | overweight.tw.                                                                                                                                                    | 76,708                                   |
| 14 | 7 or 8 or 9 or 10 or 11 or 12 or 13                                                                                                                               | 398,378                                  |
| 15 | Risk Assessment/                                                                                                                                                  | 290,450                                  |
| 16 | risk analys*.tw.                                                                                                                                                  | 6,900                                    |
| 17 | nutrition assessment/                                                                                                                                             | 16,427                                   |
| 18 | Nutrition* assessment*.tw.                                                                                                                                        | 5,943                                    |
| 19 | Anthropometry/                                                                                                                                                    | 40,283                                   |
| 20 | anthropometr*.tw.                                                                                                                                                 | 59,988                                   |
| 21 | "body weights and measures"/ or body fat distribution/ or body mass index/ or body size/ or body height/ or body weight/ or sagittal abdominal diameter/ or waist | 365,578                                  |

|    |                                                                                                           |           |
|----|-----------------------------------------------------------------------------------------------------------|-----------|
|    | circumference/ or waist-height ratio/ or body surface area/<br>or skinfold thickness/ or waist-hip ratio/ |           |
| 22 | body mass index/                                                                                          | 138,215   |
| 23 | quetelet index.tw.                                                                                        | 491       |
| 24 | Body mass index*.tw.                                                                                      | 205,275   |
| 25 | BMI.tw.                                                                                                   | 163,110   |
| 26 | waist hip ratio*.tw.                                                                                      | 4,227     |
| 27 | skinfold thickness.tw.                                                                                    | 3,820     |
| 28 | ((waist or abdominal) adj2 (circumference* or diameter*<br>or measur*).tw.                                | 36,332    |
| 29 | waist height ratio*.tw.                                                                                   | 475       |
| 30 | (obesity adj2 (manag* or guideline* or measur*).tw.                                                       | 6,750     |
| 31 | (weight adj2 (assess* or Measur* or manag* or<br>record*).tw.                                             | 26,808    |
| 32 | 15 or 16 or 17 or 18 or 19 or 20 or 21 or 22 or 23 or 24 or<br>25 or 26 or 27 or 28 or 29 or 30 or 31     | 897,461   |
| 33 | 6 and 14 and 32                                                                                           | 3,947     |
| 34 | observational study/                                                                                      | 112,847   |
| 35 | exp Cohort Studies/                                                                                       | 2,238,711 |
| 36 | Cross-Sectional Studies/                                                                                  | 395,811   |
| 37 | exp case-control studies/                                                                                 | 1,243,913 |
| 38 | case reports/                                                                                             | 2,221,553 |
| 39 | observational stud*.tw.                                                                                   | 129,947   |
| 40 | cohort stud*.tw.                                                                                          | 252,108   |
| 41 | cross-sectional stud*.tw.                                                                                 | 202,987   |
| 42 | case control stud*.tw.                                                                                    | 114,641   |
| 43 | case series.tw.                                                                                           | 87,502    |
| 44 | case stud*.tw.                                                                                            | 108,683   |

|    |                                                                                                                                                                            |           |
|----|----------------------------------------------------------------------------------------------------------------------------------------------------------------------------|-----------|
| 45 | case histor*.tw.                                                                                                                                                           | 12,948    |
| 46 | case report*.tw.                                                                                                                                                           | 407,817   |
| 47 | case comparison*.tw.                                                                                                                                                       | 708       |
| 48 | case base.tw.                                                                                                                                                              | 122       |
| 49 | prevalence stud*.tw.                                                                                                                                                       | 5,709     |
| 50 | longitudinal stud*.tw.                                                                                                                                                     | 84,271    |
| 51 | follow up stud*.tw.                                                                                                                                                        | 52,359    |
| 52 | prospective stud*.tw.                                                                                                                                                      | 188,483   |
| 53 | retrospective stud*.tw.                                                                                                                                                    | 183,893   |
| 54 | Electronic Health Records/                                                                                                                                                 | 23,614    |
| 55 | health record*.tw.                                                                                                                                                         | 24,610    |
| 56 | medical record*.tw.                                                                                                                                                        | 122,413   |
| 57 | patient record*.tw.                                                                                                                                                        | 13,682    |
| 58 | qualitative research/                                                                                                                                                      | 69,103    |
| 59 | qualitative.tw.                                                                                                                                                            | 262,287   |
| 60 | interview/                                                                                                                                                                 | 29,952    |
| 61 | interview*.tw.                                                                                                                                                             | 396,852   |
| 62 | experienc*.tw.                                                                                                                                                             | 1,239,418 |
| 63 | 34 or 35 or 36 or 37 or 38 or 39 or 40 or 41 or 42 or 43 or 44 or 45 or 46 or 47 or 48 or 49 or 50 or 51 or 52 or 53 or 54 or 55 or 56 or 57 or 58 or 59 or 60 or 61 or 62 | 6,715,787 |
| 64 | 33 and 63                                                                                                                                                                  | 2,347     |
| 65 | exp child/ or child, preschool/ or exp infant/                                                                                                                             | 2,613,117 |
| 66 | child*.tw.                                                                                                                                                                 | 1,486,218 |
| 67 | 65 or 66                                                                                                                                                                   | 3,025,083 |
| 68 | 64 not 67                                                                                                                                                                  | 1,769     |
| 69 | limit 68 to English language                                                                                                                                               | 1,661     |

Embase via OvidSP (1947 - present)

Search repeated on 25/11/21

| #  | Query                                                                                                                                                                                                                              | Results from 25th Nov 2021 |
|----|------------------------------------------------------------------------------------------------------------------------------------------------------------------------------------------------------------------------------------|----------------------------|
| 1  | primary health care/                                                                                                                                                                                                               | 71,908                     |
| 2  | general practice/                                                                                                                                                                                                                  | 82,366                     |
| 3  | (primary adj2 (care or health*)).tw.                                                                                                                                                                                               | 211,681                    |
| 4  | ((general or family) adj (practice* or practitioner*)).tw.                                                                                                                                                                         | 119,145                    |
| 5  | ((family or community or practice*) adj (medic* or doctor* or physician* or nurs*)).tw.                                                                                                                                            | 61,008                     |
| 6  | 1 or 2 or 3 or 4 or 5                                                                                                                                                                                                              | 402,212                    |
| 7  | obesity/ or overnutrition/ or abdominal obesity/ or diabetic obesity/ or maternal obesity/ or metabolic syndrome x/ or metabolically benign obesity/ or morbid obesity/ or obesity associated inflammation/ or sarcopenic obesity/ | 564,931                    |
| 8  | overweight.tw.                                                                                                                                                                                                                     | 116,959                    |
| 9  | overnutrition.tw.                                                                                                                                                                                                                  | 2,129                      |
| 10 | hypernutrition.tw.                                                                                                                                                                                                                 | 87                         |
| 11 | obes*.tw.                                                                                                                                                                                                                          | 497,753                    |
| 12 | 7 or 8 or 9 or 10 or 11                                                                                                                                                                                                            | 691,801                    |
| 13 | risk assessment/                                                                                                                                                                                                                   | 642,360                    |
| 14 | risk analys*.tw.                                                                                                                                                                                                                   | 10,891                     |
| 15 | nutritional assessment/                                                                                                                                                                                                            | 32,946                     |
| 16 | nutrition* assessment*.tw.                                                                                                                                                                                                         | 9,486                      |
| 17 | anthropometry/                                                                                                                                                                                                                     | 60,255                     |
| 18 | anthropometr*.tw.                                                                                                                                                                                                                  | 88,470                     |
| 19 | body weight/ or body weight change/ or body weight control/                                                                                                                                                                        | 350,919                    |
| 20 | body fat distribution/ or body fat percentage/                                                                                                                                                                                     | 8,611                      |
| 21 | body mass/                                                                                                                                                                                                                         | 514,870                    |

|    |                                                                                                                                                                                                                                                                                                                                                                                                 |           |
|----|-------------------------------------------------------------------------------------------------------------------------------------------------------------------------------------------------------------------------------------------------------------------------------------------------------------------------------------------------------------------------------------------------|-----------|
| 22 | anthropometric parameters/ or abdominal circumference/<br>or adipose tissue thickness/ or body adiposity index/ or<br>body fat percentage/ or body height/ or body mass/ or<br>body size/ or body weight/ or sagittal abdominal diameter/<br>or total body fat/ or total body surface area/ or waist<br>circumference/ or waist hip ratio/ or waist to height ratio/<br>or weight height ratio/ | 879,707   |
| 23 | skinfold thickness/                                                                                                                                                                                                                                                                                                                                                                             | 14,631    |
| 24 | quetelet index.tw.                                                                                                                                                                                                                                                                                                                                                                              | 568       |
| 25 | body mass index*.tw.                                                                                                                                                                                                                                                                                                                                                                            | 301,374   |
| 26 | BMI.tw.                                                                                                                                                                                                                                                                                                                                                                                         | 348,314   |
| 27 | waist hip ratio*.tw.                                                                                                                                                                                                                                                                                                                                                                            | 6,517     |
| 28 | skinfold thickness*.tw.                                                                                                                                                                                                                                                                                                                                                                         | 5,749     |
| 29 | ((waist or abdominal) adj2 (circumference* or diameter*<br>or measur*).tw.                                                                                                                                                                                                                                                                                                                      | 58,312    |
| 30 | waist height ratio*.tw.                                                                                                                                                                                                                                                                                                                                                                         | 750       |
| 31 | (obesity adj2 (manag* or guideline* or measur*).tw.                                                                                                                                                                                                                                                                                                                                             | 9,735     |
| 32 | (weight adj2 (assess* or measur* or manag* or<br>record*).tw.                                                                                                                                                                                                                                                                                                                                   | 40,197    |
| 33 | 13 or 14 or 15 or 16 or 17 or 18 or 19 or 20 or 21 or 22 or<br>23 or 24 or 25 or 26 or 27 or 28 or 29 or 30 or 31 or 32                                                                                                                                                                                                                                                                         | 1,702,045 |
| 34 | 6 and 12 and 33                                                                                                                                                                                                                                                                                                                                                                                 | 7,229     |
| 35 | observational study/ or observational stud*.tw.                                                                                                                                                                                                                                                                                                                                                 | 312,495   |
| 36 | cohort analysis/ or cohort stud*.tw.                                                                                                                                                                                                                                                                                                                                                            | 855,948   |
| 37 | cross-sectional study/ or cross-sectional stud*.tw.                                                                                                                                                                                                                                                                                                                                             | 493,778   |
| 38 | case control study/ or population based case control study/<br>or case control stud*.tw.                                                                                                                                                                                                                                                                                                        | 238,398   |
| 39 | case report/ or (case report* or case histor* or case base or<br>case comparison* or case series).tw.                                                                                                                                                                                                                                                                                           | 2,909,888 |
| 40 | longitudinal study/ or longitudinal stud*.tw. or follow up<br>stud*.tw.                                                                                                                                                                                                                                                                                                                         | 267,646   |
| 41 | prospective study/ or prospective stud*.tw.                                                                                                                                                                                                                                                                                                                                                     | 824,409   |



|    |                                                                                          |           |
|----|------------------------------------------------------------------------------------------|-----------|
| 42 | retrospective study/ or retrospective stud*.tw.                                          | 1,215,975 |
| 43 | electronic health record/ or (health record* or medical record* or patient* record*).tw. | 283,785   |
| 44 | quantitative.tw                                                                          | 867,485   |
| 45 | qualitative research/                                                                    | 94,353    |
| 46 | qualitative.tw.                                                                          | 334,859   |
| 47 | interview/                                                                               | 227,656   |
| 48 | interview*.tw.                                                                           | 508,149   |
| 49 | experienc*.tw.                                                                           | 1,787,221 |
| 50 | 35 or 36 or 37 or 38 or 39 or 40 or 41 or 42 or 43 or 44 or 45 or 46 or 47 or 48 or 49   | 8,044,506 |
| 51 | 34 and 50                                                                                | 3,787     |
| 52 | exp child/                                                                               | 2,994,174 |
| 53 | child*.tw.                                                                               | 1,998,334 |
| 54 | 52 or 53                                                                                 | 3,517,058 |
| 55 | 51 not 54                                                                                | 3,008     |
| 56 | limit 55 to english language                                                             | 2,904     |

## CINAHL via EBSCO

|     |                                                                                                                                                                                                                     |           |
|-----|---------------------------------------------------------------------------------------------------------------------------------------------------------------------------------------------------------------------|-----------|
| S1  | (MH "Primary Health Care")                                                                                                                                                                                          | (68,452)  |
| S2  | (MH "Family Practice")                                                                                                                                                                                              | (26,060)  |
| S3  | TI ( primary N2 (care OR health*) ) OR AB ( primary N2 (care OR health*) )                                                                                                                                          | (98,478)  |
| S4  | TI "general practice*" OR AB "general practice*"                                                                                                                                                                    | (17,218)  |
| S5  | TI "family practice*" OR AB "family practice*"                                                                                                                                                                      | (2,583)   |
| S6  | TI "family practitioner*" OR AB "family practitioner*"                                                                                                                                                              | (532)     |
| S7  | TI "general practitioner*" OR AB "general practitioner*"                                                                                                                                                            | (20,299)  |
| S8  | TI ( ((family OR community OR practice*) N2 (Doctor* OR physician* OR NURS*)) ) OR AB ( ((family OR community OR practice*) N2 (Doctor* OR physician* OR NURS*)) )                                                  | (89,399)  |
| S9  | S1 OR S2 OR S3 OR S4 OR S5 OR S6 OR S7 OR S8                                                                                                                                                                        | (236,098) |
| S10 | (MH "Overnutrition") OR (MM "Obesity, Maternal") OR (MM "Obesity, Morbid") OR (MH "Obesity+")                                                                                                                       | (107,322) |
| S11 | TI overweight OR obes* OR overnutrition OR hypernutrition                                                                                                                                                           | (59,247)  |
| S12 | AB overweight OR obes* OR overnutrition OR hypernutrition                                                                                                                                                           | (96,744)  |
| S13 | S10 OR S11 OR S12                                                                                                                                                                                                   | (152,475) |
| S14 | (MH "Risk Assessment")                                                                                                                                                                                              | (121,279) |
| S15 | TI risk analysis OR AB risk analysis                                                                                                                                                                                | (27,946)  |
| S16 | (MH "Nutritional Assessment")                                                                                                                                                                                       | (16,752)  |
| S17 | TI nutrition* assessment* OR AB nutrition* assessment*                                                                                                                                                              | (5,092)   |
| S18 | (MH "Body Mass Index") OR (MH "Body Size") OR (MH "Body Surface Area") OR (MH "Body Weight+") OR (MH "Waist Circumference") OR (MH "Waist-Hip Ratio") OR (MH "Body Weights and Measures+") OR (MH "Anthropometry+") | (254,870) |

|     |                                                                                                                                                                                                                                                          |           |
|-----|----------------------------------------------------------------------------------------------------------------------------------------------------------------------------------------------------------------------------------------------------------|-----------|
| S19 | TI ( "body Mass index" OR BMI OR "quetelet index" OR "waist hip ratio*" OR "skinfold thickness" OR "waist height ratio*" ) OR AB ( "body Mass index" OR BMI OR "quetelet index" OR "waist hip ratio*" OR "skinfold thickness" OR "waist height ratio*" ) | (99,434)  |
| S20 | TI ( ((waist OR abdominal) N2 (circumference* OR diameter* OR measur*)) ) OR AB ( ((waist OR abdominal) N2 (circumference* OR diameter* OR measur*)) )                                                                                                   | (14,244)  |
| S21 | TI ( obesity N2 (manag* OR guideline* OR measur*) ) OR AB ( obesity N2 (manag* OR guideline* OR measur*) )                                                                                                                                               | (3,649)   |
| S22 | TI ( weight N2 (manag* OR assess* OR measur* OR record*) ) OR AB ( weight N2 (manag* OR assess* OR measur* OR record*) )                                                                                                                                 | (14,646)  |
| S23 | S14 OR S15 OR S16 OR S17 OR S18 OR S19 OR S20 OR S21 OR S22                                                                                                                                                                                              | (443,890) |
| S24 | S9 AND S13 AND S23                                                                                                                                                                                                                                       | (3,941)   |
| S25 | (MH "Prospective Studies+") OR (MH "Cross Sectional Studies") OR (MH "Case Control Studies+")                                                                                                                                                            | (742,114) |
| S26 | TI ( "cohort stud*" OR "case control stud*" OR "observational stud*" OR "cross sectional stud*" ) OR AB ( "cohort stud*" OR "case control stud*" OR "observational stud*" OR "cross sectional stud*" )                                                   | (267,124) |
| S27 | (MH "Case Studies")                                                                                                                                                                                                                                      | (25,211)  |
| S28 | TI ( "case report*" OR "case stud*" OR "case series" OR "case histor*" OR "case base" OR "case comparison*" ) OR AB ( "case report*" OR "case stud*" OR "case series" OR "case histor*" OR "case base" OR "case comparison*" )                           | (173,690) |
| S29 | TI ( "prevalence stud*" OR "longitudinal stud*" OR "Follow up stud*" OR "prospective stud*" OR "retrospective stud*" ) OR AB ( "prevalence stud*" OR "longitudinal stud*" OR "Follow up stud*" OR "prospective stud*" OR "retrospective stud*" )         | (142,287) |
| S30 | (MH "Electronic Health Records+")                                                                                                                                                                                                                        | (27,388)  |

|     |                                                                                                                                          |             |
|-----|------------------------------------------------------------------------------------------------------------------------------------------|-------------|
| S31 | TI ( "medical record*" OR "patient* record*" OR "health record*" ) OR AB ( "medical record*" OR "patient* record*" OR "health record*" ) | (64,123)    |
| S32 | (MH "Qualitative Studies+")                                                                                                              | (161,978)   |
| S33 | TI qualitative OR AB qualitative                                                                                                         | (143,640)   |
| S34 | (MH "Interviews+")                                                                                                                       | (234,331)   |
| S35 | TI interview* OR AB interview*                                                                                                           | (237,270)   |
| S36 | TI experienc* AND AB experienc*                                                                                                          | (54,416)    |
| S37 | S25 OR S26 OR S27 OR S28 OR S29 OR S30 OR S31 OR S32 OR S33 OR S34 OR S35 OR S36                                                         | (1,477,201) |
| S38 | S24 AND S37                                                                                                                              | (1,538)     |
| S39 | (MH "Child+")                                                                                                                            | (713,632)   |
| S40 | TI child* OR AB child*                                                                                                                   | (535,788)   |
| S41 | S39 OR S40                                                                                                                               | (901,349)   |
| S42 | (S38) NOT (S41)                                                                                                                          | (1,082)     |

### Web searching

**NOTES:** Four papers (not retrieved in any of the database searches) were identified by via internet searching.

1. McLaughlin, Hamilton, K., & Kipping, R. (2017). Epidemiology of adult overweight recording and management by UK GPs: a systematic review. *British Journal of General Practice*, 67(663), e676–e683. <https://doi.org/10.3399/bjgp17X692309>

This paper was not retrieved in the searches because it **did not contain any terms from the qual/quant concept group.**

2. Dalton, Bottle, A., Okoro, C., Majeed, A., & Millett, C. (2011). Implementation of the NHS Health Checks programme: baseline assessment of risk factor recording in an urban culturally diverse setting. *Family Practice*, 28(1), 34–40. <https://doi.org/10.1093/fampra/cmq068>

This paper was not retrieved because it **does not contain any terms from the obesity/overweight concept group.**

- 1  
2  
3 3. Turner, Harris, M. F., & Mazza, D. (2015). Obesity management in general practice:  
4 does current practice match guideline recommendations? *Medical Journal of*  
5 *Australia*, 202(7), 370–372. <https://doi.org/10.5694/mja14.00998>  
6  
7

8 This paper was not retrieved because it contained the word children in the abstract –  
9 **this paper was eliminated by the NOT child\* component of the search**  
10

- 11  
12 4. Gaynor, Habermann, B., & Wright, R. (2018). Waist Circumference Measurement  
13 Diffusion in Primary Care. *Journal for Nurse Practitioners*, 14(9), 683–688.e1.  
14 <https://doi.org/10.1016/j.nurpra.2018.06.002>  
15

16  
17 This paper is indexed in CINAHL, however was not retrieved because it **does not**  
18 **contain any term obesity in the article record in CINAHL.**  
19  
20  
21  
22  
23  
24  
25  
26  
27  
28  
29  
30  
31  
32  
33  
34  
35  
36  
37  
38  
39  
40  
41  
42  
43  
44  
45  
46  
47  
48  
49  
50  
51  
52  
53  
54  
55  
56  
57  
58  
59  
60

**Supplementary Table S2: List of excluded studies with reasons***Quantitative studies*

- Did not meet eligibility criteria for population and setting<sup>1-19</sup>
- Did not meet eligibility criteria for patient factor<sup>1 2 5-9 11-14 16 18-27</sup>
- Did not meet eligibility criteria for outcome<sup>1 5 6 8 9 11-13 16 18 19 23 28-51</sup>

*Qualitative studies*

- Did not meet eligibility criteria for population and setting<sup>52</sup>
- Did not meet eligibility criteria for interest<sup>5 6 18 20 28 29 31 52-62</sup>

For peer review only

Supplementary Table S3: Characteristics and summary of quantitative studies reviewed

| Study details                                                                                                                                                                               | Population and setting                                                                                                                                                                                                                                                                                                                                                                                                                                                                                                                                                                                                      | Patient factors (independent variables)                                                                                                                                                                                                               | Outcomes (obesity related anthropometric assessments) | Statistical methods, results/effect estimates                                                                                                                                                                                                                                                                                                                                                                                                                                                                                                                                                                                                                                                               | Author's conclusions and reviewer's comments                                                                                                                                                                                                                                                                                                                                                                                                                                                                                                 |
|---------------------------------------------------------------------------------------------------------------------------------------------------------------------------------------------|-----------------------------------------------------------------------------------------------------------------------------------------------------------------------------------------------------------------------------------------------------------------------------------------------------------------------------------------------------------------------------------------------------------------------------------------------------------------------------------------------------------------------------------------------------------------------------------------------------------------------------|-------------------------------------------------------------------------------------------------------------------------------------------------------------------------------------------------------------------------------------------------------|-------------------------------------------------------|-------------------------------------------------------------------------------------------------------------------------------------------------------------------------------------------------------------------------------------------------------------------------------------------------------------------------------------------------------------------------------------------------------------------------------------------------------------------------------------------------------------------------------------------------------------------------------------------------------------------------------------------------------------------------------------------------------------|----------------------------------------------------------------------------------------------------------------------------------------------------------------------------------------------------------------------------------------------------------------------------------------------------------------------------------------------------------------------------------------------------------------------------------------------------------------------------------------------------------------------------------------------|
| <p><b>Authors:</b><br/>Aleem et al. <sup>63</sup></p> <p><b>Year published:</b><br/>2015</p> <p><b>Study design:</b><br/>Cross sectional study</p> <p><b>Country:</b><br/>United States</p> | <p><b>Sample size:</b><br/>N=10,931 records</p> <p><b>Inclusion criteria:</b></p> <ul style="list-style-type: none"> <li>• Patients aged 18-65 years before or during the study period</li> </ul> <p><b>Exclusion criteria:</b></p> <ul style="list-style-type: none"> <li>• Visits with missing data</li> </ul> <p><b>Setting and population:</b></p> <ul style="list-style-type: none"> <li>• Records from Dartmouth-Hitchcock Medical Center data repository system for the year 2012 for the patients coming for preventive care visit in 3 adult primary care center within the system in New Hampshire, US</li> </ul> | <p><b>1. Factors associated with BMI calculation:</b></p> <ul style="list-style-type: none"> <li>• Insurance type</li> </ul>                                                                                                                          | <p>BMI calculation</p>                                | <p><b>Statistical analysis:</b></p> <ul style="list-style-type: none"> <li>• Descriptive for proportions</li> <li>• Chi-square test or a Fisher's test to find association of the variable with the BMI recording (not relevant to calculated PR below)</li> </ul> <p><b>Results/effects estimates:</b></p> <p>1. Factors associated with BMI calculation:</p> <ul style="list-style-type: none"> <li>• Insurance type: (Medicaid Calculated PR*: 1.04, Medicare Calculated PR*: 1.01, others including managed care Calculated PR*: 1.02, Self-pay Calculated PR*: 0.97, Ref Private insurance)</li> </ul>                                                                                                 | <p><b>Author's conclusions:</b></p> <p>“Despite high clinician-reported documentation of obesity as an active problem, actual obesity documentation rates remained low in a rural academic medical center.”</p> <p><b>Reviewer's comments:</b></p> <p>This study shows that patients with Medicare and Medicaid insurance were positively associated with BMI calculation and patients on self-pay were negatively associated with BMI calculation.</p> <p>This study has clearly met 5/8 (63%) criteria in the critical appraisal tool.</p> |
| <p><b>Authors:</b><br/>Baer et al. <sup>64</sup></p> <p><b>Year published:</b><br/>2013</p> <p><b>Study design:</b><br/>Cross sectional study</p> <p><b>Country:</b><br/>United States</p>  | <p><b>Sample size:</b><br/>N=219,356</p> <p><b>Inclusion criteria:</b></p> <ul style="list-style-type: none"> <li>• Patients aged ≥18 years before or during the study period</li> <li>• Patients who had at least 2 visits with the same clinician</li> <li>• Patients who were not pregnant at the time of the visit</li> </ul> <p><b>Exclusion criteria:</b><br/>None</p> <p><b>Setting and population:</b></p>                                                                                                                                                                                                          | <p><b>1. Factors associated with documentation of BMI:</b></p> <ul style="list-style-type: none"> <li>• Age</li> <li>• Sex</li> <li>• Ethnicity</li> <li>• Primary insurance</li> <li>• Frequency of consultation</li> <li>• Comorbidities</li> </ul> | <p>BMI documentation</p>                              | <p><b>Statistical analysis:</b></p> <ul style="list-style-type: none"> <li>• Descriptive for proportions</li> <li>• Logistic regression to estimate OR for documentation of BMI, adjusted for covariates</li> </ul> <p><b>Results/effects estimates:</b></p> <p>Proportion of patients with at least one BMI documentation between 2004 and 2008:</p> <ul style="list-style-type: none"> <li>• 65.9% had BMI documented</li> </ul> <p>1. Predictors of BMI documentation:</p> <ul style="list-style-type: none"> <li>• Age (≥70y OR: 0.60, 60-69y OR: 0.94, 30-39y OR: 0.93, Ref 18-29y)</li> <li>• Sex: Female (OR: 1.45, Ref male)</li> <li>• Ethnicity (other or missing OR: 0.84, Ref White)</li> </ul> | <p><b>Author's conclusions:</b></p> <p>“In conclusion, many primary care patients lack documentation of BMI in the EHR, and most overweight and obese patients do not have a diagnosis on the problem list. Further research should focus on interventions to improve documentation of BMI and diagnosis and management of overweight and obesity in the primary care setting.”</p> <p><b>Reviewer's comments:</b></p>                                                                                                                       |

|                                                                                                                                                                                                                     |                                                                                                                                                                                                                                                                                                                                                                                                                                                                                                                                                                                 |                                                                                                                                                                                                                                                                  |                          |                                                                                                                                                                                                                                                                                                                                                                                                                                                                                                                                                                                                                                                                                                                             |                                                                                                                                                                                                                                                                                                                                                                                                                                                                                                                                                                      |
|---------------------------------------------------------------------------------------------------------------------------------------------------------------------------------------------------------------------|---------------------------------------------------------------------------------------------------------------------------------------------------------------------------------------------------------------------------------------------------------------------------------------------------------------------------------------------------------------------------------------------------------------------------------------------------------------------------------------------------------------------------------------------------------------------------------|------------------------------------------------------------------------------------------------------------------------------------------------------------------------------------------------------------------------------------------------------------------|--------------------------|-----------------------------------------------------------------------------------------------------------------------------------------------------------------------------------------------------------------------------------------------------------------------------------------------------------------------------------------------------------------------------------------------------------------------------------------------------------------------------------------------------------------------------------------------------------------------------------------------------------------------------------------------------------------------------------------------------------------------------|----------------------------------------------------------------------------------------------------------------------------------------------------------------------------------------------------------------------------------------------------------------------------------------------------------------------------------------------------------------------------------------------------------------------------------------------------------------------------------------------------------------------------------------------------------------------|
|                                                                                                                                                                                                                     | <ul style="list-style-type: none"> <li>Records from 25 primary care practices within a large academic care network in Boston, Massachusetts, US, between 2004 and 2008</li> </ul>                                                                                                                                                                                                                                                                                                                                                                                               |                                                                                                                                                                                                                                                                  |                          | <ul style="list-style-type: none"> <li>Primary insurance (Medicare OR: 0.94, no insurance or self-pay OR: 0.64, Ref private)</li> <li>Frequency of consultation (6-9 OR: 1.87, 10-14 OR: 2.78, <math>\geq 15</math> OR: 4.66, Ref 2-5)</li> <li>Number of obesity-related comorbidities (1 OR: 1.34, 2 OR: 1.48, <math>\geq 3</math> OR: 1.73, Ref 0 comorbidity)</li> </ul>                                                                                                                                                                                                                                                                                                                                                | <p>This study shows that female sex, other or missed ethnicity, younger age, having private insurance, increasing number of visits to clinic, and increasing number of chronic medical conditions were positively associated with BMI documentation.</p> <p>This study has clearly met 8/8 (100%) criteria in the critical appraisal tool.</p>                                                                                                                                                                                                                       |
| <p><b>Authors:</b><br/>Bleich, Pickett-Blakely &amp; Cooper <sup>65</sup></p> <p><b>Year published:</b><br/>2011</p> <p><b>Study design:</b><br/>Cross sectional study</p> <p><b>Country:</b><br/>United States</p> | <p><b>Sample size:</b><br/>N=2,458</p> <p><b>Inclusion criteria:</b></p> <ul style="list-style-type: none"> <li>Patients aged <math>\geq 18</math> years</li> <li>Patients who had a BMI of <math>\geq 30</math> kg/m<sup>2</sup></li> </ul> <p><b>Exclusion criteria:</b><br/>None</p> <p><b>Setting and population:</b></p> <ul style="list-style-type: none"> <li>Records of patients from participating non-federally employed physicians in 2005 National Ambulatory Medical Care Survey from randomly selected geographic area and speciality in United States</li> </ul> | <p><b>1. Factors associated with obesity diagnosis:</b></p> <ul style="list-style-type: none"> <li>Race/ethnicity</li> <li>Sex</li> <li>Age</li> <li>Insurance</li> <li>Geographic region</li> <li>Co-morbidity risk status</li> <li>Obesity category</li> </ul> | <p>Obesity diagnosis</p> | <p><b>Statistical analysis:</b></p> <ul style="list-style-type: none"> <li>Descriptive for proportions</li> <li>Logistic regression to estimate OR for obesity diagnosis, adjusted for covariates</li> </ul> <p><b>Results/effects estimates:</b><br/>Proportion of patients with obesity diagnosis at the time of survey:</p> <ul style="list-style-type: none"> <li>28.9% had obesity diagnosis</li> </ul> <p>1. Predictors of BMI documentation:</p> <ul style="list-style-type: none"> <li>Sex: Women (OR: 1.54, Ref men)</li> <li>Age (18-29y OR: 2.61, Ref <math>\geq 65</math>y)</li> <li>Geographic region (Midwest OR: 1.78, Ref South)</li> <li>Obesity Class (III OR: 4.36, II OR: 2.08, Ref Class I)</li> </ul> | <p><b>Author's conclusions:</b><br/>"Most obese patients do not receive an obesity diagnosis or weight-related counseling. Practice implications: Preventive visits may provide a key opportunity for obese patients to receive weight-related counseling from their physician"</p> <p><b>Reviewer's comments:</b><br/>This study shows that female sex, younger age, having severe obesity, and residing in Midwest US were positively associated with obesity diagnosis.</p> <p>This study has clearly met 8/8 (100%) criteria in the critical appraisal tool.</p> |
| <p><b>Authors:</b><br/>Booth, Prevost &amp; Gulliford <sup>66</sup></p> <p><b>Year published:</b><br/>2013</p>                                                                                                      | <p><b>Sample size:</b><br/>N=67,000</p> <p><b>Inclusion criteria:</b></p> <ul style="list-style-type: none"> <li>Patients who had BMI <math>&gt; 30</math> kg/m<sup>2</sup> or a READ</li> </ul>                                                                                                                                                                                                                                                                                                                                                                                | <p><b>1. Factors associated with BMI recording:</b></p> <ul style="list-style-type: none"> <li>Sex</li> <li>Age</li> <li>BMI category</li> <li>Medical code (READ) recorded</li> </ul>                                                                           | <p>BMI records</p>       | <p><b>Statistical analysis:</b></p> <ul style="list-style-type: none"> <li>Descriptive for proportions</li> <li>Poisson regression to estimate Relative Rate Ratio (RRR) for BMI recordings, adjusted for covariates</li> <li>Person-time was used an offset and the regression model was clustered to allow differences in recording between practices</li> </ul>                                                                                                                                                                                                                                                                                                                                                          | <p><b>Author's conclusions:</b><br/>"Obese patients do not have BMI values recorded regularly. The mean BMI of obese patients, and the proportion gaining weight</p>                                                                                                                                                                                                                                                                                                                                                                                                 |



|                                                                                                                                                                                                  |                                                                                                                                                                                                                                                                                                                                                                                                                                                                                                                                                                                      |                                                                                                                                                                                                                                          |                                              |                                                                                                                                                                                                                                                                                                                                                                                                                                                                                                                                                                                                                                                                                                                                                                                                                                                                                                                                                                                                                                                                                                                                                                                                                                                                                   |                                                                                                                                                                                                                                                                                                                                                                                                                                                                                                                                                                                                                                                              |
|--------------------------------------------------------------------------------------------------------------------------------------------------------------------------------------------------|--------------------------------------------------------------------------------------------------------------------------------------------------------------------------------------------------------------------------------------------------------------------------------------------------------------------------------------------------------------------------------------------------------------------------------------------------------------------------------------------------------------------------------------------------------------------------------------|------------------------------------------------------------------------------------------------------------------------------------------------------------------------------------------------------------------------------------------|----------------------------------------------|-----------------------------------------------------------------------------------------------------------------------------------------------------------------------------------------------------------------------------------------------------------------------------------------------------------------------------------------------------------------------------------------------------------------------------------------------------------------------------------------------------------------------------------------------------------------------------------------------------------------------------------------------------------------------------------------------------------------------------------------------------------------------------------------------------------------------------------------------------------------------------------------------------------------------------------------------------------------------------------------------------------------------------------------------------------------------------------------------------------------------------------------------------------------------------------------------------------------------------------------------------------------------------------|--------------------------------------------------------------------------------------------------------------------------------------------------------------------------------------------------------------------------------------------------------------------------------------------------------------------------------------------------------------------------------------------------------------------------------------------------------------------------------------------------------------------------------------------------------------------------------------------------------------------------------------------------------------|
| <p><b>Study design:</b><br/>Cohort study</p> <p><b>Country:</b><br/>United Kingdom</p>                                                                                                           | <p>medical diagnosis code indicating obesity</p> <p><b>Exclusion criteria:</b></p> <ul style="list-style-type: none"> <li>Person-time outside the age range of 18-100 years</li> </ul> <p><b>Setting and population:</b></p> <ul style="list-style-type: none"> <li>Records from 127 family practices in UK GPRD which contained EHR from 600 general practices in the United Kingdom, between 1 January 1997 and 31 December 2009</li> </ul>                                                                                                                                        | <ul style="list-style-type: none"> <li>Socio-economic relative deprivation</li> </ul>                                                                                                                                                    |                                              | <p><b>Results/effects estimates:</b></p> <p>Proportion of patients with a BMI recording:</p> <ul style="list-style-type: none"> <li>99.2% of all patients at some point between 1 January 1997 and 31 December 2009.</li> </ul> <p>1. Predictors of BMI recording:</p> <ul style="list-style-type: none"> <li>Sex: Female (RRR: 1.14, Ref male)</li> <li>Age (18-24y RRR: 0.85, 25-34y RRR: 0.65, 35-44y RRR: 0.62, 45-54y RRR: 0.75, 55-64y RRR: 0.87, 75-100y RRR: 0.83, Ref 65-74y)</li> <li>BMI category (obesity class I RRR: 0.78, obesity class III RRR: 1.19, unknown RRR: 0.24, Ref overweight)</li> <li>Medical code recorded: 'yes' (RRR: 1.46, Ref 'no')</li> <li>Smoking status (ex-smoker RRR: 1.22, smoker RRR: 0.93, not known RRR: 0.96, Ref non-smoker)</li> <li>Index of multiple deprivation: IMD Quintile (3 RRR: 1.19, 4 RRR: 1.19, 5 RRR: 1.21, Ref Quintile 1 least deprived)</li> </ul>                                                                                                                                                                                                                                                                                                                                                                  | <p>over time, is increasing. Improved strategies for monitoring and managing obesity are required.”</p> <p><b>Reviewer’s comments:</b></p> <p>This study shows that several socio demographics (aged 65-74 years, female sex, increasing socio-economic deprivation), behavioural factors (former smoking), and obesity class II/III and known BMI were positively associated with BMI recordings.</p> <p>This study has clearly met 9/10 (90%) criteria in the critical appraisal tool.</p>                                                                                                                                                                 |
| <p><b>Authors:</b><br/>Bramlage et al.<br/><small>67</small></p> <p><b>Year published:</b><br/>2004</p> <p><b>Study design:</b><br/>Cross sectional study</p> <p><b>Country:</b><br/>Germany</p> | <p><b>Sample size:</b><br/>N=45,125</p> <p><b>Inclusion criteria:</b></p> <ul style="list-style-type: none"> <li>Patients attending the target day assessment (half day, alternatively September 18 or 20, 2001)</li> </ul> <p><b>Exclusion criteria:</b></p> <ul style="list-style-type: none"> <li>Patients who had a BMI of &lt;18.5 kg/m<sup>2</sup></li> </ul> <p><b>Setting and population:</b></p> <ul style="list-style-type: none"> <li>Records of patients from participating 1912 primary care practices in HYDRA study performed in September 2001 in Germany</li> </ul> | <p><b>1. Factors associated with poor recognition of overweight and obesity:</b></p> <ul style="list-style-type: none"> <li>Age</li> <li>Sex</li> <li>Diagnosis with vascular complications</li> <li>Numbers of comorbidities</li> </ul> | <p>Recognition of overweight and obesity</p> | <p><b>Statistical analysis:</b></p> <ul style="list-style-type: none"> <li>Descriptive for proportions</li> <li>Logistic regression to estimate OR for poor recognition of overweight and obesity, adjusted for covariates</li> </ul> <p><b>Results/effects estimates:</b></p> <p>Proportion of patients with recognition of overweight and obesity by the doctor at the time of survey:</p> <ul style="list-style-type: none"> <li>20-30% of overweight patients had recognition of overweight</li> <li>60-70% of patients with grade 3 obesity had recognition of obesity</li> </ul> <p>1. Predictors of poor recognition of obesity:</p> <ul style="list-style-type: none"> <li>Sex: female (OR: 1.40, Ref male)</li> <li>Age (≥60y OR: 1.60, 40-59y OR: 1.50, Ref 30-40y)</li> <li>Diagnosis with vascular complications: yes (OR: 2.10, Ref no)</li> <li>Comorbid conditions (3-4 OR: 3.40, ≥5 OR: 6.40, Ref none)</li> </ul> <p>2. Predictors of poor recognition of overweight:</p> <ul style="list-style-type: none"> <li>Sex: female (OR: 1.30, Ref male)</li> <li>Age (≥60y OR: 1.90, 40-59y OR: 1.60, Ref 30-40y)</li> <li>Diagnosis with vascular complications: yes (OR: 2.20, Ref no)</li> <li>Comorbid conditions (3-4 OR: 3.30, ≥5 OR: 5.10, Ref none)</li> </ul> | <p><b>Author’s conclusions:</b></p> <p>“Primary care management of overweight and obesity is largely deficient, predominantly due to four interrelated factors: doctors’ poor recognition of patients’ weight status, doctors’ inefficient efforts at intervention, patients’ poor acceptance of such interventions and dissatisfaction with existing life-style modification strategies.”</p> <p><b>Reviewer’s comments:</b></p> <p>This study shows that female sex, older age, having diagnosis with vascular complications and increased number of comorbid conditions were positively associated with poor recognition of obesity by their doctors.</p> |

|                                                                                                                                                                                                             |                                                                                                                                                                                                                                                                                                                                                                                                                                                                                                                                                                                                          |                                                                                                                                                                                                                                                                                          |                    |                                                                                                                                                                                                                                                                                                                                                                                                                                                                                                                                                                                                                                                                                                                                                                                                                                                                                                                                                                                                                                               |                                                                                                                                                                                                                                                                                                                                                                                                                                                                                                                                                                                                                                                                                                                                                                                                                                                                                                                                                                                                                                                                   |
|-------------------------------------------------------------------------------------------------------------------------------------------------------------------------------------------------------------|----------------------------------------------------------------------------------------------------------------------------------------------------------------------------------------------------------------------------------------------------------------------------------------------------------------------------------------------------------------------------------------------------------------------------------------------------------------------------------------------------------------------------------------------------------------------------------------------------------|------------------------------------------------------------------------------------------------------------------------------------------------------------------------------------------------------------------------------------------------------------------------------------------|--------------------|-----------------------------------------------------------------------------------------------------------------------------------------------------------------------------------------------------------------------------------------------------------------------------------------------------------------------------------------------------------------------------------------------------------------------------------------------------------------------------------------------------------------------------------------------------------------------------------------------------------------------------------------------------------------------------------------------------------------------------------------------------------------------------------------------------------------------------------------------------------------------------------------------------------------------------------------------------------------------------------------------------------------------------------------------|-------------------------------------------------------------------------------------------------------------------------------------------------------------------------------------------------------------------------------------------------------------------------------------------------------------------------------------------------------------------------------------------------------------------------------------------------------------------------------------------------------------------------------------------------------------------------------------------------------------------------------------------------------------------------------------------------------------------------------------------------------------------------------------------------------------------------------------------------------------------------------------------------------------------------------------------------------------------------------------------------------------------------------------------------------------------|
|                                                                                                                                                                                                             |                                                                                                                                                                                                                                                                                                                                                                                                                                                                                                                                                                                                          |                                                                                                                                                                                                                                                                                          |                    |                                                                                                                                                                                                                                                                                                                                                                                                                                                                                                                                                                                                                                                                                                                                                                                                                                                                                                                                                                                                                                               | This study has clearly met 7/8 (88%) criteria in the critical appraisal tool. One of the criteria was unclear.                                                                                                                                                                                                                                                                                                                                                                                                                                                                                                                                                                                                                                                                                                                                                                                                                                                                                                                                                    |
| <p><b>Authors:</b><br/>Cuccu, Abi-Aad &amp; Duggal <sup>68</sup></p> <p><b>Year published:</b><br/>2019</p> <p><b>Study design:</b><br/>Cross sectional study</p> <p><b>Country:</b><br/>United Kingdom</p> | <p><b>Sample size:</b><br/>N=1,154,652</p> <p><b>Inclusion criteria:</b></p> <ul style="list-style-type: none"> <li>• Patients aged 18-100 years</li> <li>• Patients residing in the Kent County Council, who were alive and registered in Kent general practice as of 6 August 2018</li> </ul> <p><b>Exclusion criteria:</b></p> <ul style="list-style-type: none"> <li>• None</li> </ul> <p><b>Setting and population:</b></p> <ul style="list-style-type: none"> <li>• Records of patients from Kent Integrated Dataset in September 2001 in the Kent, UK, between 2015/2016 and 2017/2018</li> </ul> | <p><b>1. Factors associated with null BMI recording</b></p> <ul style="list-style-type: none"> <li>• Sex</li> <li>• Age</li> <li>• Socio-economic relative deprivation</li> <li>• Diagnosis of hypertension</li> <li>• Diagnosis of SMI</li> <li>• Presence of multimorbidity</li> </ul> | Null BMI recording | <p><b>Statistical analysis:</b></p> <ul style="list-style-type: none"> <li>• Descriptive for proportions</li> <li>• Logistic regression to estimate OR for null BMI recording, adjusted for covariates</li> </ul> <p><b>Results/effects estimates:</b><br/>Proportion of patients with a missing BMI between 2015/2016 and 2017/2018:</p> <ul style="list-style-type: none"> <li>• 56.3% had null BMI recorded</li> </ul> <p>1. Predictors of null BMI recording:</p> <ul style="list-style-type: none"> <li>• Sex: Male (OR: 1.58, Ref female)</li> <li>• Age (<math>\geq 95</math>y OR: 1.49, 85-94y OR: 0.90, 75-84y OR: 0.62, 65-74y OR: 0.47, 55-64y OR: 0.49, 45-54y OR: 0.53, 35-44y OR: 0.62, 25-34y OR: 0.66, Ref 18-24y)</li> <li>• Socioeconomic deprivation Quintile (3 OR: 0.97, 4: 0.89, Ref Quintile 1 Least deprived)</li> <li>• Diagnosis of hypertension (OR: 0.76, Ref none)</li> <li>• Diagnosis of SMI (OR: 0.62, Ref none)</li> <li>• Presence of multimorbidity (OR: 0.39, Ref 0 or 1 long term conditions)</li> </ul> | <p><b>Author's conclusions:</b><br/>"Findings were aligned to previous research using nationally representative samples. Completeness of recording varied by age, sex, deprivation, and comorbidity. Recording within general practice was aligned to chronic disease management. From a prevention perspective, earlier assessment, and intervention for the management of excess weight within primary care may be an opportunity for avoiding increases in BMI trajectory. There may also be merit in recognising that the external disease agents that influence obesity can be controlled or reduced (obesogenic environment) from a national policy perspective. Such a perspective may also help reduce stigmatisation and the pressure around arguments that centre on personal responsibility for obesity."</p> <p><b>Reviewer's comments:</b><br/>This study shows that socio demographics (aged 95y and above and male sex) were positively associated with null BMI recording, while being aged 25 to 94y, increasing socio-economic deprivation,</p> |

|                                                                                                                                                                                           |                                                                                                                                                                                                                                                                                                                                                                                                                                                                                                                                                                                                                                                                |                                                                                                                                                                                                                                                                                                                                                                              |                                                                                                      |                                                                                                                                                                                                                                                                                                                                                                                                                                                                                                                                                                                                                                                                                                                                                                                                                                                                                                                                                                                                                                                                                                                                            |                                                                                                                                                                                                                                                                                                                                                                                                                                                                                                                                                                                                                                   |
|-------------------------------------------------------------------------------------------------------------------------------------------------------------------------------------------|----------------------------------------------------------------------------------------------------------------------------------------------------------------------------------------------------------------------------------------------------------------------------------------------------------------------------------------------------------------------------------------------------------------------------------------------------------------------------------------------------------------------------------------------------------------------------------------------------------------------------------------------------------------|------------------------------------------------------------------------------------------------------------------------------------------------------------------------------------------------------------------------------------------------------------------------------------------------------------------------------------------------------------------------------|------------------------------------------------------------------------------------------------------|--------------------------------------------------------------------------------------------------------------------------------------------------------------------------------------------------------------------------------------------------------------------------------------------------------------------------------------------------------------------------------------------------------------------------------------------------------------------------------------------------------------------------------------------------------------------------------------------------------------------------------------------------------------------------------------------------------------------------------------------------------------------------------------------------------------------------------------------------------------------------------------------------------------------------------------------------------------------------------------------------------------------------------------------------------------------------------------------------------------------------------------------|-----------------------------------------------------------------------------------------------------------------------------------------------------------------------------------------------------------------------------------------------------------------------------------------------------------------------------------------------------------------------------------------------------------------------------------------------------------------------------------------------------------------------------------------------------------------------------------------------------------------------------------|
|                                                                                                                                                                                           |                                                                                                                                                                                                                                                                                                                                                                                                                                                                                                                                                                                                                                                                |                                                                                                                                                                                                                                                                                                                                                                              |                                                                                                      |                                                                                                                                                                                                                                                                                                                                                                                                                                                                                                                                                                                                                                                                                                                                                                                                                                                                                                                                                                                                                                                                                                                                            | diagnosis of hypertension, SMI and presence of multimorbidity were negatively associated with null BMI recording.<br><br>This study has clearly met 8/8 (100%) criteria in the critical appraisal tool.                                                                                                                                                                                                                                                                                                                                                                                                                           |
| <p><b>Authors:</b><br/>Cyr et al. <sup>69</sup></p> <p><b>Year published:</b><br/>2016</p> <p><b>Study design:</b><br/>Cross sectional study</p> <p><b>Country:</b><br/>United States</p> | <p><b>Sample size:</b><br/>N=6,195</p> <p><b>Inclusion criteria:</b></p> <ul style="list-style-type: none"> <li>• Patients aged <math>\geq 18</math> years</li> <li>• Patients who had a BMI <math>\geq 25</math> kg/m<sup>2</sup></li> </ul> <p><b>Exclusion criteria:</b></p> <ul style="list-style-type: none"> <li>• Patients who were pregnant at the time of visit</li> </ul> <p><b>Setting and population:</b></p> <ul style="list-style-type: none"> <li>• Records of patients from family medicine residency program with two sites (urban and suburban), with 17 faculty and 21 residents in United States between December 2011 and 2013</li> </ul> | <p><b>1. Factors associated with inclusion of obesity and/or overweight in the problem list:</b></p> <ul style="list-style-type: none"> <li>• Sex</li> <li>• Age</li> <li>• Race</li> <li>• Insurance</li> <li>• BMI</li> <li>• Presence of hypertension</li> <li>• Presence of type 2 diabetes</li> <li>• Presence of hyperlipidemia</li> <li>• Numbers of visit</li> </ul> | <p>Overweight/obesity documentation (inclusion of obesity and/or overweight in the problem list)</p> | <p><b>Statistical analysis:</b></p> <ul style="list-style-type: none"> <li>• Descriptive for proportions</li> <li>• Multivariate regression to estimate OR for overweight/obesity documentation, adjusted for covariates</li> </ul> <p><b>Results/effects estimates:</b></p> <p>Proportion of patients with overweight/obesity documentation between December 2011 and 2013:</p> <ul style="list-style-type: none"> <li>• 21.1% had overweight/obesity documentation</li> </ul> <p>1. Predictors of null overweight/obesity documentation:</p> <ul style="list-style-type: none"> <li>• Sex: Female (OR: 1.48, Ref male)</li> <li>• Insurance (Medicaid OR: 0.72, Ref commercial insurance)</li> <li>• BMI (<math>\geq 40</math> kg/m<sup>2</sup> OR: 24.78, 30-<math>&lt;40</math> kg/m<sup>2</sup> OR: 5.36, Ref 25-<math>&lt;30</math> kg/m<sup>2</sup>)</li> <li>• Presence of hypertension: yes (OR: 1.25, Ref no)</li> <li>• Presence of type 2 diabetes: yes (OR: 1.48, Ref no)</li> <li>• Presence of hyperlipidemia: yes (OR: 1.28, Ref no)</li> <li>• Number of visits (<math>\geq 6</math> OR: 1.39, Ref 1-2 visits)</li> </ul> | <p><b>Author's conclusions:</b></p> <p>“Nearly 80% of OW and obese patients were not identified on the problem list. Patient gender, comorbidity, and number of visits were associated with documentation. Future research should examine automatic documentation of OW/obesity on the medical problem list.”</p> <p><b>Reviewer's comments:</b></p> <p>This study shows that female sex, higher BMI, presence of hypertension, type 2 diabetes and dyslipidaemia were positively associated with overweight and obesity documentation.</p> <p>This study has clearly met 8/8 (100%) criteria in the critical appraisal tool.</p> |
| <p><b>Authors:</b><br/>Dalton et al. <sup>70</sup></p> <p><b>Year published:</b><br/>2011</p> <p><b>Study design:</b><br/>Cross sectional study</p>                                       | <p><b>Sample size:</b><br/>N=21,510</p> <p><b>Inclusion criteria:</b></p> <ul style="list-style-type: none"> <li>• Patients aged 35-74 years during the study period</li> <li>• Patients who had anthropometric measurement taken in last 5 years</li> </ul> <p><b>Exclusion criteria:</b></p>                                                                                                                                                                                                                                                                                                                                                                 | <p><b>1. Factors associated with BMI recording:</b></p> <ul style="list-style-type: none"> <li>• Sex/Age</li> <li>• Ethnicity</li> <li>• Socio-economic relative deprivation</li> <li>• Hypertension</li> </ul>                                                                                                                                                              | <p>BMI records</p>                                                                                   | <p><b>Statistical analysis:</b></p> <ul style="list-style-type: none"> <li>• Descriptive for proportions</li> <li>• Logistic regression to estimate OR for BMI recordings, adjusted for covariates</li> </ul> <p><b>Results/effects estimates:</b></p> <p>Proportion of patients with a BMI recording between December 2008 and January 2009:</p> <ul style="list-style-type: none"> <li>• 72.8% of all patients</li> </ul> <p>1. Predictors of BMI recording:</p>                                                                                                                                                                                                                                                                                                                                                                                                                                                                                                                                                                                                                                                                         | <p><b>Author's conclusions:</b></p> <p>“The workload implications of the NHS Health Checks programme for general practices in England are substantial. There are considerable variations in risk factor recording between practices and between age, gender and ethnic groups.”</p>                                                                                                                                                                                                                                                                                                                                               |

|                                                                                                                                                                                                     |                                                                                                                                                                                                                                                                                                                                                                                                                                                                                                                                                                                                                                                                                                                                                                                                                                                                                                                       |                                                                                                                                                                                                                            |                                            |                                                                                                                                                                                                                                                                                                                                                                                                                                                                                                                                                                                                                                                                                                                                                                                                                                                                                                                                                                                                                                                                                                                                                                                                                                                                                                                                                                                                                                                                                                                                                                                            |                                                                                                                                                                                                                                                                                                                                                                                                                                                                                                                                                                                                                     |
|-----------------------------------------------------------------------------------------------------------------------------------------------------------------------------------------------------|-----------------------------------------------------------------------------------------------------------------------------------------------------------------------------------------------------------------------------------------------------------------------------------------------------------------------------------------------------------------------------------------------------------------------------------------------------------------------------------------------------------------------------------------------------------------------------------------------------------------------------------------------------------------------------------------------------------------------------------------------------------------------------------------------------------------------------------------------------------------------------------------------------------------------|----------------------------------------------------------------------------------------------------------------------------------------------------------------------------------------------------------------------------|--------------------------------------------|--------------------------------------------------------------------------------------------------------------------------------------------------------------------------------------------------------------------------------------------------------------------------------------------------------------------------------------------------------------------------------------------------------------------------------------------------------------------------------------------------------------------------------------------------------------------------------------------------------------------------------------------------------------------------------------------------------------------------------------------------------------------------------------------------------------------------------------------------------------------------------------------------------------------------------------------------------------------------------------------------------------------------------------------------------------------------------------------------------------------------------------------------------------------------------------------------------------------------------------------------------------------------------------------------------------------------------------------------------------------------------------------------------------------------------------------------------------------------------------------------------------------------------------------------------------------------------------------|---------------------------------------------------------------------------------------------------------------------------------------------------------------------------------------------------------------------------------------------------------------------------------------------------------------------------------------------------------------------------------------------------------------------------------------------------------------------------------------------------------------------------------------------------------------------------------------------------------------------|
| <p><b>Country:</b><br/>United Kingdom</p>                                                                                                                                                           | <ul style="list-style-type: none"> <li>Patients in CVD or diabetes register</li> </ul> <p><b>Setting and population:</b></p> <ul style="list-style-type: none"> <li>Records from 14 general practices participating in the NHS Health Checks programme in Ealing Primary Care Trust (PCT), North West London, between December 2008 and January 2009</li> </ul>                                                                                                                                                                                                                                                                                                                                                                                                                                                                                                                                                       |                                                                                                                                                                                                                            |                                            | <ul style="list-style-type: none"> <li>Sex/Age (male/65-74y OR: 0.68, male/55-64y OR: 0.55, male/45-54y OR: 0.47, male/35-44y OR: 0.46, Ref female/35-44y)</li> <li>Ethnicity (mixed OR:1.77, missing OR:0.31, Ref White)</li> <li>Socio-economic quintiles: deprivation fifth quintile (2 OR: 1.16, Ref quintile 1)</li> <li>Presence of hypertension: yes (OR:3.23, Ref no)</li> </ul>                                                                                                                                                                                                                                                                                                                                                                                                                                                                                                                                                                                                                                                                                                                                                                                                                                                                                                                                                                                                                                                                                                                                                                                                   | <p><b>Reviewer’s comments:</b><br/>This study shows that female sex, mixed ethnicity, and having hypertension were positively associated with BMI recording.</p> <p>This study has clearly met 8/8 (100%) criteria in the critical appraisal tool.</p>                                                                                                                                                                                                                                                                                                                                                              |
| <p><b>Authors:</b><br/>Emanuel et al.<br/><sup>71</sup></p> <p><b>Year published:</b><br/>2016</p> <p><b>Study design:</b><br/>“Matched cohort study”</p> <p><b>Country:</b><br/>United Kingdom</p> | <p><b>Sample size:</b><br/>N=14,586<br/>(RA case: 1121, RA control: 4282, IBD case: 1875, IBD control: 7308)</p> <p><b>Inclusion criteria:</b></p> <ul style="list-style-type: none"> <li>Case: Patients diagnosed with RA and IBD (including ulcerative colitis and Crohn’s disease) as per READ code on study date</li> <li>Control: Patients matched on age, gender and general practice with randomly sampled from all patients who were disease free</li> <li>Patients registered uninterruptedly</li> <li>with the practice for specified data collection timepoints</li> </ul> <p><b>Exclusion criteria:</b></p> <ul style="list-style-type: none"> <li>None</li> </ul> <p><b>Setting and population:</b></p> <ul style="list-style-type: none"> <li>Records of patients registered with local general practices on study date of 12 January 2014 from Lambeth DataNet, a patient level database of</li> </ul> | <p><b>1. Factors associated with BMI recording and obesity diagnosis</b></p> <ul style="list-style-type: none"> <li>Presence of Rheumatoid Arthritis (RA)</li> <li>Presence of Inflammatory Bowel Disease (IBD)</li> </ul> | <p>BMI recording and obesity diagnosis</p> | <p><b>Statistical analysis:</b></p> <ul style="list-style-type: none"> <li>Descriptive for proportions</li> <li>Conditional Poisson regression to estimate OR for BMI recording at the prespecified time point (1 year before, 1 year after and 5 years after case index date), adjusted for age, gender, ethnicity and deprivation</li> </ul> <p><b>Results/effects estimates:</b><br/>Proportion of patients with BMI recording from study time points (from case index date):</p> <ul style="list-style-type: none"> <li>RA case: 13%, 13% and 34% for 1 year before, 1 year after and 5 years after, respectively</li> <li>RA control: 10%, 8% and 28% for 1 year before, 1 year after and 5 years after, respectively</li> <li>IBD case: 8%, 12% and 27% for 1 year before, 1 year after and 5 years after, respectively</li> <li>IBD control: 10%, 8% and 22% for 1 year before, 1 year after and 5 years after, respectively</li> </ul> <p>1. Estimated differences in BMI recording (Ref control group, time duration from case index date):</p> <ul style="list-style-type: none"> <li>Presence of RA: OR: 1.52 and OR: 1.49 for 1 year before and 1 year after, respectively</li> <li>Presence of IBD: OR: 2.24, OR: 1.61 and OR: 1.31 for 1 year before, 1 year after and 5 years after, respectively</li> </ul> <p>2. Estimated differences in obesity diagnosis (Ref control group, time duration from case index date):</p> <ul style="list-style-type: none"> <li>Presence of RA: OR: 1.64 for 1 year after</li> <li>Presence of IBD: OR: 0.77 for 5 years after</li> </ul> | <p><b>Author’s conclusions:</b><br/>“The assessment and treatment of vascular risk in patients with RA and IBD in primary care is suboptimal, particularly with reference to CVD risk score calculation.”</p> <p><b>Reviewer’s comments:</b><br/>This study shows that presence of RA and IBD are positively associated with BMI recording. While the presence of RA is positively associated with obesity diagnosis, the presence of IBD is inversely associated with obesity diagnosis.</p> <p>This study has clearly met 7/8 (88%) criteria in the critical appraisal tool. One of the criteria was unclear.</p> |

|                                                                                                                                                                                  |                                                                                                                                                                                                                                                                                                                                                                                                                                                                                                                                                                                                   |                                                                                                                                                                                                                                                                                                                                                                                                                                                                                                                                                                                                                                                                                                                                                                                                                                                |                                 |                                                                                                                                                                                                                                                                                                                                                                                                                                                                                                                                                                                                                                                                                                                                                                                                                                                                                                                                                                                               |                                                                                                                                                                                                                                                                                                                                                                                                                                                                                                                                                                                                                                                                                                                                                                                                                                                                                                    |
|----------------------------------------------------------------------------------------------------------------------------------------------------------------------------------|---------------------------------------------------------------------------------------------------------------------------------------------------------------------------------------------------------------------------------------------------------------------------------------------------------------------------------------------------------------------------------------------------------------------------------------------------------------------------------------------------------------------------------------------------------------------------------------------------|------------------------------------------------------------------------------------------------------------------------------------------------------------------------------------------------------------------------------------------------------------------------------------------------------------------------------------------------------------------------------------------------------------------------------------------------------------------------------------------------------------------------------------------------------------------------------------------------------------------------------------------------------------------------------------------------------------------------------------------------------------------------------------------------------------------------------------------------|---------------------------------|-----------------------------------------------------------------------------------------------------------------------------------------------------------------------------------------------------------------------------------------------------------------------------------------------------------------------------------------------------------------------------------------------------------------------------------------------------------------------------------------------------------------------------------------------------------------------------------------------------------------------------------------------------------------------------------------------------------------------------------------------------------------------------------------------------------------------------------------------------------------------------------------------------------------------------------------------------------------------------------------------|----------------------------------------------------------------------------------------------------------------------------------------------------------------------------------------------------------------------------------------------------------------------------------------------------------------------------------------------------------------------------------------------------------------------------------------------------------------------------------------------------------------------------------------------------------------------------------------------------------------------------------------------------------------------------------------------------------------------------------------------------------------------------------------------------------------------------------------------------------------------------------------------------|
|                                                                                                                                                                                  | primary care EHR of over 350, 000 people residing in Lambeth borough, London, United Kingdom                                                                                                                                                                                                                                                                                                                                                                                                                                                                                                      |                                                                                                                                                                                                                                                                                                                                                                                                                                                                                                                                                                                                                                                                                                                                                                                                                                                |                                 |                                                                                                                                                                                                                                                                                                                                                                                                                                                                                                                                                                                                                                                                                                                                                                                                                                                                                                                                                                                               |                                                                                                                                                                                                                                                                                                                                                                                                                                                                                                                                                                                                                                                                                                                                                                                                                                                                                                    |
| <p><b>Authors:</b><br/>Ghosh <sup>72</sup></p> <p><b>Year published:</b><br/>2016</p> <p><b>Study design:</b><br/>Cross sectional study</p> <p><b>Country:</b><br/>Australia</p> | <p><b>Sample size:</b><br/>N=118,709</p> <p><b>Inclusion criteria:</b></p> <ul style="list-style-type: none"> <li>• Patients aged ≥18 years</li> </ul> <p><b>Exclusion criteria:</b></p> <ul style="list-style-type: none"> <li>• Patients without a recorded age and/or gender</li> </ul> <p><b>Setting and population:</b></p> <ul style="list-style-type: none"> <li>• Records of patients from 17 general practices in the Sentinel Practices Data Sourcing (SPDS) project in Illawarra Shoalhaven region of New South Wales, Australia between September 2011 and September 2013.</li> </ul> | <p><b>1. Factors associated with BMI recording:</b></p> <ul style="list-style-type: none"> <li>• Age</li> <li>• Sex</li> <li>• Presence of specific medical conditions: hypertension, hyperlipidaemia, musculoskeletal (osteoarthritis, osteoporosis and inflammatory arthritis), mental (bipolar, anxiety and depression), respiratory (asthma and chronic obstructive pulmonary disease), diabetes (type 1 and type 2 diabetes mellitus), cardiovascular (congestive heart disease, myocardial infarction, heart failure, acute coronary syndrome, peripheral vascular disease, left ventricular hypertrophy, atrial fibrillation and carotid stenosis), renal (renal artery stenosis, acute renal failure, chronic renal failure and renal impairment), stroke and cancer (cancer and multiple myeloma)</li> <li>• Disease count</li> </ul> | BMI recording                   | <p><b>Statistical analysis:</b></p> <ul style="list-style-type: none"> <li>• Descriptive for proportions</li> <li>• Multivariate regression to estimate OR for BMI recording, adjusted for SEIFA–IRSD and covariates</li> </ul> <p><b>Results/effects estimates:</b><br/>Proportion of patients with an anthropometry measurement between September 2011 and September 2013:</p> <ul style="list-style-type: none"> <li>• 30.9% had BMI recording</li> <li>• 8.0% had WC recording</li> </ul> <p>1. Predictors of BMI recording:</p> <ul style="list-style-type: none"> <li>• Age (≥75y OR: 1.17, 45-64y OR: 1.25, Ref 18-44y)</li> <li>• Presence of specific medical conditions: (hypertension OR: 1.11, hyperlipidaemia OR: 1.14, musculoskeletal OR: 1.21, mental OR: 0.80, respiratory OR: 0.91, diabetes OR: 1.83, cardiovascular OR: 1.14, renal OR: 1.52, Ref absence of specific medical condition)</li> <li>• Disease count (≥3 OR: 5.18, 2 OR: 4.12, 1 OR: 2.65, Ref 0)</li> </ul> | <p><b>Author’s conclusions:</b><br/>“Recording of measures of obesity and overweight in general practices within regional settings is much lower than optimal. More support and advocacy around weighing patients at all interactions is required for regional general practitioners to increase the weight screening in primary care. These findings have policy-relevant implications for weight management in regional Australia.”</p> <p><b>Reviewer’s comments:</b><br/>This study shows that older age, presence of hypertension, hyperlipidaemia, musculoskeletal conditions, diabetes, cardiovascular conditions, renal conditions were positively associated with BMI recording. Presence of mental health conditions and respiratory conditions were negatively associated with BMI recording.</p> <p>This study has clearly met 8/8 (100%) criteria in the critical appraisal tool.</p> |
| <b>Authors:</b>                                                                                                                                                                  | <b>Sample size:</b><br>N=2,384                                                                                                                                                                                                                                                                                                                                                                                                                                                                                                                                                                    | <b>1. Factors associated with weight and/or waist</b>                                                                                                                                                                                                                                                                                                                                                                                                                                                                                                                                                                                                                                                                                                                                                                                          | Weight and/or waist measurement | <b>Statistical analysis:</b>                                                                                                                                                                                                                                                                                                                                                                                                                                                                                                                                                                                                                                                                                                                                                                                                                                                                                                                                                                  | <b>Author’s conclusions:</b>                                                                                                                                                                                                                                                                                                                                                                                                                                                                                                                                                                                                                                                                                                                                                                                                                                                                       |

|                                                                                                                                                                                |                                                                                                                                                                                                                                                                                                                                                                                                                                                                                                                                     |                                                                                                                                                                                                                                                                                                                                                                                                                             |                      |                                                                                                                                                                                                                                                                                                                                                                                                                                                                                                                                                                                                                                                                                                                                                                        |                                                                                                                                                                                                                                                                                                                                                                                                                                                                                                                                                                                                                |
|--------------------------------------------------------------------------------------------------------------------------------------------------------------------------------|-------------------------------------------------------------------------------------------------------------------------------------------------------------------------------------------------------------------------------------------------------------------------------------------------------------------------------------------------------------------------------------------------------------------------------------------------------------------------------------------------------------------------------------|-----------------------------------------------------------------------------------------------------------------------------------------------------------------------------------------------------------------------------------------------------------------------------------------------------------------------------------------------------------------------------------------------------------------------------|----------------------|------------------------------------------------------------------------------------------------------------------------------------------------------------------------------------------------------------------------------------------------------------------------------------------------------------------------------------------------------------------------------------------------------------------------------------------------------------------------------------------------------------------------------------------------------------------------------------------------------------------------------------------------------------------------------------------------------------------------------------------------------------------------|----------------------------------------------------------------------------------------------------------------------------------------------------------------------------------------------------------------------------------------------------------------------------------------------------------------------------------------------------------------------------------------------------------------------------------------------------------------------------------------------------------------------------------------------------------------------------------------------------------------|
| <p>Gonzalez-Chica et al. <sup>73</sup></p> <p><b>Year published:</b> 2019</p> <p><b>Study design:</b> Cross sectional study</p> <p><b>Country:</b> Australia</p>               | <p><b>Inclusion criteria:</b></p> <ul style="list-style-type: none"> <li>• Patients aged <math>\geq 35</math> years</li> </ul> <p><b>Exclusion criteria:</b></p> <ul style="list-style-type: none"> <li>• Patients with a terminal illness or a mental incapacity</li> <li>• Patients who are unable to speak English</li> </ul> <p><b>Setting and population:</b></p> <ul style="list-style-type: none"> <li>• Data of Health Omnibus Survey 2017 conducted in South Australia between September 2017 and December 2017</li> </ul> | <p><b>measurement (self-reported):</b></p> <ul style="list-style-type: none"> <li>• Presence of cardiometabolic risk factor (body mass index <math>\geq 30</math> kg/m<sup>2</sup>, hypertension, diabetes and/or dyslipidaemia, but without cardiovascular diseases)</li> <li>• Presence of cardiovascular disease (heart attack, angina, heart failure, and/or stroke, with or without metabolic risk factors)</li> </ul> |                      | <ul style="list-style-type: none"> <li>• Maximum likelihood estimates (pseudolikelihood log) and Wald tests for heterogeneity and trend were used to estimate predicted prevalence, adjusted for covariates (not relevant to calculated PR below).</li> </ul> <p><b>Results/effects estimates:</b></p> <ol style="list-style-type: none"> <li>1. Predicted adjusted prevalence of weight and/or waist measurement by their GP in the last 12 months:</li> </ol> <ul style="list-style-type: none"> <li>• Presence of cardiometabolic risk factor: Yes (Calculated PR*: 1.43, Ref none)</li> <li>• Presence of cardiovascular disease: Yes (Calculated PR*: 1.81, Ref none)</li> </ul>                                                                                  | <p>“More frequent and comprehensive CVD-related assessments by GPs were more important in promoting a healthier lifestyle than the presence of CVD or cardiometabolic risk factors by themselves.”</p> <p><b>Reviewer’s comments:</b></p> <p>This study shows higher prevalence of weight and/or waist measurement in patients with self-reported cardiometabolic risk factors and cardiovascular disease.</p> <p>This study has clearly met 8/8 (100%) criteria in the critical appraisal tool.</p>                                                                                                           |
| <p><b>Authors:</b> Gutiérrez Angulo et al. <sup>74</sup></p> <p><b>Year published:</b> 2014</p> <p><b>Study design:</b> Cross sectional study</p> <p><b>Country:</b> Spain</p> | <p><b>Sample size:</b> N=620</p> <p><b>Inclusion criteria:</b></p> <ul style="list-style-type: none"> <li>• Patients aged &gt;14 years#</li> </ul> <p><b>Exclusion criteria:</b></p> <ul style="list-style-type: none"> <li>• None</li> </ul> <p><b>Setting and population:</b></p> <ul style="list-style-type: none"> <li>• Records of 620 patients randomly selected from 63,820 patients assigned to 3 participating primary care centres in the province of Gipuzkoa, Spain between January 2012 to January 2013</li> </ul>     | <p><b>1. Factors associated with BMI recording:</b></p> <ul style="list-style-type: none"> <li>• Presence of comorbid conditions (such as diabetes mellitus, hypertension, hyperlipidaemia, coronary ischemia, congestive heart failure, stroke, sleep apnoea syndrome, peripheral venous insufficiency, and hypothyroidism)</li> </ul>                                                                                     | <p>BMI recording</p> | <p><b>Statistical analysis:</b></p> <ul style="list-style-type: none"> <li>• Descriptive for proportions</li> <li>• Chi-square test or a Fisher’s test to find association of the variable with the BMI recording (not relevant to calculated RR below).</li> </ul> <p><b>Results/effects estimates:</b></p> <p>Proportion of patients with an anthropometry measurement between January 2012 to January 2013:</p> <ul style="list-style-type: none"> <li>• 28% had weight recording</li> <li>• 27% had BMI recording</li> <li>• 0.2% had WC recording</li> <li>• 6% had obesity recording</li> </ul> <p>1. Factors associated with BMI recording:</p> <ul style="list-style-type: none"> <li>• Presence of comorbidity: Yes (Calculated RR*: 3.10, Ref No)</li> </ul> | <p><b>Author’s conclusions:</b></p> <p>“This study confirmed that prevalence of obesity is underestimated, mainly because it is inadequately recorded in clinical histories; that prevalence increases in the presence of other risk factors; and that there is a significant variability in data collection between healthcare professionals.”</p> <p><b>Reviewer’s comments:</b></p> <p>This study shows that presence of comorbidity is positively associated with BMI recording.</p> <p>This study has clearly met 4/8 (50%) criteria in the critical appraisal tool. One of the criteria was unclear.</p> |

|                                                                                                                                                                                              |                                                                                                                                                                                                                                                                                                                                                                                                                                                                                                                                          |                                                                                                                                                                                                                                                                                                                                          |                              |                                                                                                                                                                                                                                                                                                                                                                                                                                                                                                                                                                                                                                                                                                                                                                     |                                                                                                                                                                                                                                                                                                                                                                                                                                                                                                                                                                                                                                                                                                 |
|----------------------------------------------------------------------------------------------------------------------------------------------------------------------------------------------|------------------------------------------------------------------------------------------------------------------------------------------------------------------------------------------------------------------------------------------------------------------------------------------------------------------------------------------------------------------------------------------------------------------------------------------------------------------------------------------------------------------------------------------|------------------------------------------------------------------------------------------------------------------------------------------------------------------------------------------------------------------------------------------------------------------------------------------------------------------------------------------|------------------------------|---------------------------------------------------------------------------------------------------------------------------------------------------------------------------------------------------------------------------------------------------------------------------------------------------------------------------------------------------------------------------------------------------------------------------------------------------------------------------------------------------------------------------------------------------------------------------------------------------------------------------------------------------------------------------------------------------------------------------------------------------------------------|-------------------------------------------------------------------------------------------------------------------------------------------------------------------------------------------------------------------------------------------------------------------------------------------------------------------------------------------------------------------------------------------------------------------------------------------------------------------------------------------------------------------------------------------------------------------------------------------------------------------------------------------------------------------------------------------------|
| <p><b>Authors:</b><br/>Mattar et al. <sup>75</sup></p> <p><b>Year published:</b><br/>2017</p> <p><b>Study design:</b><br/>Cross-sectional study</p> <p><b>Country:</b><br/>United states</p> | <p><b>Sample size:</b><br/>N= 3,868</p> <p><b>Inclusion criteria:</b></p> <ul style="list-style-type: none"> <li>Adults aged 18 years and older with two or more visits during the study window</li> </ul> <p><b>Exclusion criteria:</b></p> <ul style="list-style-type: none"> <li>Children and pregnant women</li> </ul> <p><b>Setting and population:</b></p> <ul style="list-style-type: none"> <li>Patient EMR gathered through routine care at the Wichita Falls Family Medicine Clinic during June 2012 and June 2015.</li> </ul> | <p><b>Factors associated with BMI documentation</b></p> <ul style="list-style-type: none"> <li>Age</li> <li>Sex</li> <li>Race</li> <li>Type of insurance</li> <li>BMI</li> <li>Morbid obesity (BMI ≥ 40)</li> <li>Total number of comorbidities</li> </ul>                                                                               | <p>Obesity documentation</p> | <p><b>Statistical analysis:</b></p> <ul style="list-style-type: none"> <li>Descriptive statistics for proportions</li> <li>Logistic regression to estimate OR for obesity documentation, adjusted for covariates.</li> </ul> <p><b>Results/effects estimates:</b><br/>Proportion of patients had obesity documented during June 2012 and June 2015:</p> <ul style="list-style-type: none"> <li>102 (35.3%) had their BMI calculated and documented</li> </ul> <p>1.Predictors of obesity documentation:</p> <ul style="list-style-type: none"> <li>Age (OR: 0.97) (continuous)</li> <li>Female 0.58 (OR: 0.58, Ref male)</li> <li>Morbid obesity (BMI ≥ 40) (OR: 1.60, Ref BMI &lt; 40)</li> <li>Number of Comorbidities (OR: 1.33) (continuous)</li> </ul>         | <p><b>Author’s conclusions:</b><br/>“Based on EHR documentation, obesity is under coded and generally not identified as a significant problem in primary care. Physicians are more likely to document obesity in the patient record for those with higher BMI scores who are morbidly obese. Moreover, physicians more frequently provide exercise than diet counseling for the documented obese.”</p> <p><b>Reviewer’s comments:</b><br/>This study shows that decreasing age, male sex, morbid obesity BMI ≥ 40, and number of comorbidities were positively associated with obesity documentation.</p> <p>This study has clearly met 8/8 (100%) criteria in the critical appraisal tool.</p> |
| <p><b>Authors:</b><br/>Melamed et al. <sup>76</sup></p> <p><b>Year published:</b><br/>2009</p> <p><b>Study design:</b><br/>Cross-sectional study</p> <p><b>Country:</b><br/>Israel</p>       | <p><b>Sample size:</b><br/>N= 289</p> <p><b>Inclusion criteria:</b></p> <ul style="list-style-type: none"> <li>Patients scheduled to see a participating physician (at least 1-year tenure in the family practice and at least a year-long rapport with the patients)</li> <li>Patients who had medical insurance coverage by CHS</li> </ul> <p><b>Exclusion criteria:</b></p>                                                                                                                                                           | <p><b>Factors associated with BMI documentation</b></p> <ul style="list-style-type: none"> <li>Education level</li> <li>Residence</li> <li>Sex</li> <li>Smoking</li> <li>Physical activity</li> <li>Comorbidities</li> <li>Chronic medication use</li> <li>The number of medical encounters in the past 6 months</li> <li>BMI</li> </ul> | <p>BMI documentation</p>     | <p><b>Statistical analysis:</b></p> <ul style="list-style-type: none"> <li>Descriptive statistics for proportions</li> <li>Logistic regression to estimate OR for BMI documentation, adjusted for covariates.</li> </ul> <p><b>Results/effects estimates:</b><br/>Proportion of patients that had their BMI calculated and documented during January 2004 (n=289):</p> <ul style="list-style-type: none"> <li>102 (35.3%) had their BMI calculated and documented</li> </ul> <p>1.Predictors of BMI documentation:</p> <ul style="list-style-type: none"> <li>Age (≥ 55y OR: 2.77, Ref &lt; 55y)</li> <li>Obesity (BMI ≥ 30.0kg/m<sup>2</sup>) (OR: 2.04, Ref no)</li> <li>Diabetes mellitus (OR: 4.35, Ref no)</li> <li>Hypertension (OR: 3.20, Ref no)</li> </ul> | <p><b>Author’s conclusions:</b><br/>“Family physicians failed to identify most obese and overweight patients, as seen by lack of BMI documentation and concordant diagnoses in the medical problem list. Determination of BMI by physicians in family practice is of utmost importance, and its incorporation into medical care should be optimized.”</p> <p><b>Reviewer’s comments:</b><br/>This study shows that older age (≥ 55y), having obesity,</p>                                                                                                                                                                                                                                       |

|                                                                                                                                                                                                    |                                                                                                                                                                                                                                                                                                                                                                                                                                                                                                                                                                                                                                                                                                                                                                                                                       |                                                                                                                                                                                                                                                                                                                                                                                                                                                                                                                                                                                                                                                                                                                                                                                                                                  |                                           |                                                                                                                                                                                                                                                                                                                                                                                                                                                                                                                                                                                                                                                                                                                                                                                                                                                                                                                                                                                                                                                                                                                                                                                                                                                                                                                                                                                                                                                                                                                                                                                                                                              |                                                                                                                                                                                                                                                                                                                                                                                                                                                                                                                                                                                                                                                                                                                                                   |
|----------------------------------------------------------------------------------------------------------------------------------------------------------------------------------------------------|-----------------------------------------------------------------------------------------------------------------------------------------------------------------------------------------------------------------------------------------------------------------------------------------------------------------------------------------------------------------------------------------------------------------------------------------------------------------------------------------------------------------------------------------------------------------------------------------------------------------------------------------------------------------------------------------------------------------------------------------------------------------------------------------------------------------------|----------------------------------------------------------------------------------------------------------------------------------------------------------------------------------------------------------------------------------------------------------------------------------------------------------------------------------------------------------------------------------------------------------------------------------------------------------------------------------------------------------------------------------------------------------------------------------------------------------------------------------------------------------------------------------------------------------------------------------------------------------------------------------------------------------------------------------|-------------------------------------------|----------------------------------------------------------------------------------------------------------------------------------------------------------------------------------------------------------------------------------------------------------------------------------------------------------------------------------------------------------------------------------------------------------------------------------------------------------------------------------------------------------------------------------------------------------------------------------------------------------------------------------------------------------------------------------------------------------------------------------------------------------------------------------------------------------------------------------------------------------------------------------------------------------------------------------------------------------------------------------------------------------------------------------------------------------------------------------------------------------------------------------------------------------------------------------------------------------------------------------------------------------------------------------------------------------------------------------------------------------------------------------------------------------------------------------------------------------------------------------------------------------------------------------------------------------------------------------------------------------------------------------------------|---------------------------------------------------------------------------------------------------------------------------------------------------------------------------------------------------------------------------------------------------------------------------------------------------------------------------------------------------------------------------------------------------------------------------------------------------------------------------------------------------------------------------------------------------------------------------------------------------------------------------------------------------------------------------------------------------------------------------------------------------|
|                                                                                                                                                                                                    | <ul style="list-style-type: none"> <li>Patients who were pregnant, younger than 18 years, or not fluent in Hebrew</li> </ul> <p><b>Setting and population:</b></p> <ul style="list-style-type: none"> <li>Records from 7 urban family practices of CHS in Israel affiliated with the Department of Family Medicine at Tel Aviv University during January 2004.</li> </ul>                                                                                                                                                                                                                                                                                                                                                                                                                                             |                                                                                                                                                                                                                                                                                                                                                                                                                                                                                                                                                                                                                                                                                                                                                                                                                                  |                                           | <ul style="list-style-type: none"> <li>Chronic medication use (OR: 3.44, Ref no)</li> </ul>                                                                                                                                                                                                                                                                                                                                                                                                                                                                                                                                                                                                                                                                                                                                                                                                                                                                                                                                                                                                                                                                                                                                                                                                                                                                                                                                                                                                                                                                                                                                                  | <p>diabetes mellitus, hypertension, and chronic medication use were positively associated with BMI documentation.</p> <p>This study has clearly met 8/8 (100%) criteria in the critical appraisal tool.</p>                                                                                                                                                                                                                                                                                                                                                                                                                                                                                                                                       |
| <p><b>Authors:</b><br/>Mocarski et al.<br/><sup>77</sup></p> <p><b>Year published:</b><br/>2018</p> <p><b>Study design:</b><br/>Cross-sectional study</p> <p><b>Country:</b><br/>United states</p> | <p><b>Sample size:</b><br/>N=5,512,285</p> <p><b>Inclusion criteria:</b></p> <ul style="list-style-type: none"> <li>Patients aged ≥20 years on index date and had available BMI measurement in the Quintiles EMR</li> <li>Patients had at least 3 months of follow-up data after the first recorded BMI</li> <li>Study group: ICD-9 coded patients with overweight and obesity</li> <li>Comparison group: non-coded patients</li> </ul> <p><b>Exclusion criteria:</b></p> <ul style="list-style-type: none"> <li>Pregnancy or gestational diabetes</li> </ul> <p><b>Setting and population:</b></p> <ul style="list-style-type: none"> <li>Records from 1300 sites and 49 states in United States from US primary care EHR database and the Quintile EMR database between 1 January 2014 and 30 June 2014.</li> </ul> | <p><b>Factors associated with receiving ICD-9 code for overweight or obesity:</b></p> <ul style="list-style-type: none"> <li>Age</li> <li>Sex</li> <li>Race</li> <li>CCI Category</li> <li>Comorbidities: <ul style="list-style-type: none"> <li>Prader Willi Syndrome</li> <li>Metabolic Syndrome</li> <li>Sleep Apnea</li> <li>Prediabetes</li> <li>NAFLD</li> <li>Cushing Syndrome</li> <li>Vitamin D Deficiency</li> <li>Type 2 diabetes mellitus</li> <li>Hypertension</li> <li>Dyslipidemia</li> <li>Depression</li> <li>Gallbladder Disease</li> <li>Osteoarthritis</li> <li>Feeding Difficulties</li> <li>Dyspepsia</li> <li>Cardiovascular disease</li> <li>Chronic Kidney Disease</li> <li>Malignancy</li> <li>Acute/Chronic Pancreatitis</li> <li>Inflammatory Bowel Disease</li> <li>Anorexia</li> </ul> </li> </ul> | <p>ICD-9 codes for overweight/obesity</p> | <p><b>Statistical analysis:</b></p> <ul style="list-style-type: none"> <li>Descriptive for proportions</li> <li>Logistic regression to estimate OR for being coded as with obesity and overweight as per ICD-9 code for overweight or obesity, adjusted for covariates</li> </ul> <p><b>Results/effects estimates:</b></p> <p>Proportions of patients who had ICD-9 codes for overweight or obesity between January 2014 and June 2014:</p> <ul style="list-style-type: none"> <li>15.1% of all patients (n = 833,763)</li> </ul> <p>1. Predictors of being coded for obesity in patients with BMI ≥30kg/m<sup>2</sup> (N=2,332,214)</p> <ul style="list-style-type: none"> <li>Age (20–44y OR: 1.94, 45–64y OR: 1.46, Ref ≥60y)</li> <li>Sex: Female (OR: 1.34, Ref male)</li> <li>Race: (Asian OR: 0.99, Black OR: 1.44, Hispanic OR: 1.69, Native American OR: 2.17, Multi race OR: 1.80, other race OR: 1.05, Ref White)</li> <li>CCI Category: (1 OR: 1.23, 2 OR: 1.24, 3 OR: 1.42, 4 OR: 1.59, ≥5 OR: 1.71, Ref 0)</li> <li>Comorbidities (Prader Willi Syndrome OR: 2.25, metabolic syndrome OR: 2.19, sleep apnea OR: 2.16, prediabetes OR: 1.52, NAFLD OR: 1.52, Cushing syndrome OR: 1.37, vitamin D deficiency OR: 1.33, type 2 diabetes mellitus OR: 1.24, hypertension OR: 1.24, dyslipidemia OR: 1.21, depression OR: 1.23, gallbladder disease OR: 1.17, osteoarthritis OR: 1.08, cardiovascular disease OR: 0.93, chronic kidney disease OR: 0.91, malignancy OR: 0.87, acute/chronic pancreatitis OR: 0.81, inflammatory bowel disease OR: 0.74, anorexia OR: 0.74, HIV OR: 0.67, Ref ‘no’ for each comorbidity)</li> </ul> | <p><b>Author’s conclusions:</b></p> <p>“US outpatients with overweight or obesity are not being reliably coded, making ICD-9 codes undependable sources for determining obesity prevalence and outcomes. BMI data available within EHR databases offer a more accurate and objective means of classifying overweight/obese status.”</p> <p><b>Reviewer’s comments:</b></p> <p>This study shows younger age (20–44y and 45–64y), female sex, increasing CCI category, and a few comorbidities were positively associated while except cardiovascular disease, malignancy, acute/chronic pancreatitis, inflammatory bowel disease, anorexia, and HIV were negatively associated with identification of overweight or obesity using ICD-9 codes.</p> |



|                                                                                                                                                                                            |                                                                                                                                                                                                                                                                                                                                                                                                                                                                                                                                                                                                                                                                                                                                                                                                                                                    |                                                                                                                                                                                                                                                                                                                                                                                                                                                                                                                                                                                   |                |                                                                                                                                                                                                                                                                                                                                                                                                                                                                                                                                                                                                                                                                                                                                                                                                                                                                                                                                                                                                                                                                                                                                                                                                                                                                                                                                                                                                                                                                                                                                                                                                                                                                                                                                                                                                                                                                                                                                                                                                                                 |                                                                                                                                                                                                                                                                                                                                                                                                                                                                                                                                                                                                                                                                                                                                                                                                                                                                                            |
|--------------------------------------------------------------------------------------------------------------------------------------------------------------------------------------------|----------------------------------------------------------------------------------------------------------------------------------------------------------------------------------------------------------------------------------------------------------------------------------------------------------------------------------------------------------------------------------------------------------------------------------------------------------------------------------------------------------------------------------------------------------------------------------------------------------------------------------------------------------------------------------------------------------------------------------------------------------------------------------------------------------------------------------------------------|-----------------------------------------------------------------------------------------------------------------------------------------------------------------------------------------------------------------------------------------------------------------------------------------------------------------------------------------------------------------------------------------------------------------------------------------------------------------------------------------------------------------------------------------------------------------------------------|----------------|---------------------------------------------------------------------------------------------------------------------------------------------------------------------------------------------------------------------------------------------------------------------------------------------------------------------------------------------------------------------------------------------------------------------------------------------------------------------------------------------------------------------------------------------------------------------------------------------------------------------------------------------------------------------------------------------------------------------------------------------------------------------------------------------------------------------------------------------------------------------------------------------------------------------------------------------------------------------------------------------------------------------------------------------------------------------------------------------------------------------------------------------------------------------------------------------------------------------------------------------------------------------------------------------------------------------------------------------------------------------------------------------------------------------------------------------------------------------------------------------------------------------------------------------------------------------------------------------------------------------------------------------------------------------------------------------------------------------------------------------------------------------------------------------------------------------------------------------------------------------------------------------------------------------------------------------------------------------------------------------------------------------------------|--------------------------------------------------------------------------------------------------------------------------------------------------------------------------------------------------------------------------------------------------------------------------------------------------------------------------------------------------------------------------------------------------------------------------------------------------------------------------------------------------------------------------------------------------------------------------------------------------------------------------------------------------------------------------------------------------------------------------------------------------------------------------------------------------------------------------------------------------------------------------------------------|
|                                                                                                                                                                                            |                                                                                                                                                                                                                                                                                                                                                                                                                                                                                                                                                                                                                                                                                                                                                                                                                                                    | <ul style="list-style-type: none"> <li>• HIV</li> <li>• Cachexia</li> </ul>                                                                                                                                                                                                                                                                                                                                                                                                                                                                                                       |                |                                                                                                                                                                                                                                                                                                                                                                                                                                                                                                                                                                                                                                                                                                                                                                                                                                                                                                                                                                                                                                                                                                                                                                                                                                                                                                                                                                                                                                                                                                                                                                                                                                                                                                                                                                                                                                                                                                                                                                                                                                 | This study has clearly met 8/8 (100%) criteria in the critical appraisal tool.                                                                                                                                                                                                                                                                                                                                                                                                                                                                                                                                                                                                                                                                                                                                                                                                             |
| <p><b>Authors:</b><br/>Nicolson et al.<br/><sup>78</sup></p> <p><b>Year published:</b><br/>2019</p> <p><b>Study design:</b><br/>Cohort study</p> <p><b>Country:</b><br/>United Kingdom</p> | <p><b>Sample size:</b><br/>N=4,918,746</p> <p><b>Inclusion criteria:</b></p> <ul style="list-style-type: none"> <li>• Patients aged ≥18 years before or during the study period</li> <li>• ≥1 day of research quality registration (registration at a practice with continuous data reporting deemed fit)</li> <li>• ≥1 face-to-face consultation with an HCP</li> <li>• Eligible for linkage to the NCRAS cancer registry data, practice and patient level IMD data and ONS mortality data</li> </ul> <p><b>Exclusion criteria:</b><br/>None</p> <p><b>Setting and population:</b></p> <ul style="list-style-type: none"> <li>• Records from Clinical Practice Research Datalink GOLD database between 1 January 2000 and 31 December 2017, an ongoing primary care database of anonymised EHR data covering 6.9% of the UK population</li> </ul> | <p><b>1. Clinical encounter:</b></p> <ul style="list-style-type: none"> <li>• Clinical event</li> <li>• Staff role</li> </ul> <p><b>2. Factors associated with (a) any weight measurement and (b) repeat weight measurements:</b></p> <ul style="list-style-type: none"> <li>• Sex</li> <li>• Age</li> <li>• BMI</li> <li>• Socio-economic quintiles</li> <li>• Smoking status</li> <li>• Drinking status</li> <li>• Comorbidities</li> <li>• Ethnicity</li> <li>• Pregnancy, endocrine, digestive, and cardiovascular complaints</li> <li>• Frequency of consultation</li> </ul> | Weight records | <p><b>Statistical analysis:</b></p> <ul style="list-style-type: none"> <li>• Descriptive for proportions</li> <li>• Mixed effect negative binomial regression to estimate incident rate ratio (IRR) for a weight measurement and Cox models to estimate hazard ratios (HR) for repeat weight measurement, adjusted for covariates (list all in the sup table)</li> </ul> <p><b>Results/effects estimates:</b><br/>Proportion of patients with a weight recording between 1 January 2000 and 31 December 2017:</p> <ul style="list-style-type: none"> <li>• 68.6% had at least one recording</li> <li>• 49.2% had repeat measurement within a year</li> </ul> <p>1. Clinical factors:</p> <ul style="list-style-type: none"> <li>• Same day as a chronic disease review (16.4%)</li> <li>• Lifestyle advice (10.4%)</li> <li>• Contraception consultation (10.3%)</li> <li>• Health check (6.2%)</li> <li>• Medication review (6.1%)</li> <li>• Practice registration (2.1%)</li> </ul> <p>2 (a). Predictors of any weight measurement:</p> <ul style="list-style-type: none"> <li>• Sex: Female (IRR: 1.30, Ref male)</li> <li>• Age (80-89y IRR: 0.99, 60-69y IRR: 1.11, 30-39y IRR: 0.91, Ref 18-29y)</li> <li>• BMI (&lt;18.5 kg/m<sup>2</sup> IRR: 1.17, 25-29.99 kg/m<sup>2</sup> IRR: 1.12, 30-34.99 kg/m<sup>2</sup> IRR: 1.38, &gt;35 kg/m<sup>2</sup> IRR: 1.67, Ref 18.5-24.99 kg/m<sup>2</sup>)</li> <li>• Socio-economic quintiles: IMD Quintile (II IRR: 1.03, III IRR: 1.08, IV IRR: 1.17, V IRR: 1.22, Ref IMD Quintile I)</li> <li>• Number of comorbidities (1 IRR: 1.13, 2 IRR: 1.35, 3 IRR: 1.52, 4 IRR: 1.67, 5 IRR: 1.82, Ref 0 comorbidity)</li> <li>• Ethnic groups (Indian IRR: 1.25, African IRR: 1.24, Ref White)</li> </ul> <p>2 (b). Predictors of repeat weight measurement:</p> <ul style="list-style-type: none"> <li>• Sex: Female (HR 1.30, Ref male)</li> <li>• Ex-smoker (HR 1.09, Ref non-smoker)</li> <li>• Age (80-89y HR: 1.21, 60-69y HR: 1.34, 30-39y HR: 0.90, Ref 18-29y)</li> </ul> | <p><b>Author’s conclusions:</b><br/>“Weight recording is not a routine activity in UK primary care. It is recorded for around a third of patients each year and is repeated on average every 2 years for these patients. It is more common in females with higher BMI and in those with comorbidity. Incentive payments and their removal appear to be associated with increases and decreases in weight recording.”</p> <p><b>Reviewer’s comments:</b><br/>This study shows that several socio demographics (older age, female sex, ethnic minorities, and increasing socio-economic deprivation), behavioural (former smoking), pregnancy, and increasing number of chronic medical conditions were positively associated with one or more weight recordings.</p> <p>This study has clearly met 7/10 (70%) criteria in the critical appraisal tool. Two of the criteria was unclear.</p> |

|                                                                                                                                                                                      |                                                                                                                                                                                                                                                                                                                                                                                                                                                                                                                                                                                                                                                                                                                                                                                                                                                                                                      |                                                                                                                                           |                   |                                                                                                                                                                                                                                                                                                                                                                                                                                                                                                                                                                                                                                                                                                                                                                                                                                                                                        |                                                                                                                                                                                                                                                                                                                                                                                                                                                                                                                                                                                                                                                                           |
|--------------------------------------------------------------------------------------------------------------------------------------------------------------------------------------|------------------------------------------------------------------------------------------------------------------------------------------------------------------------------------------------------------------------------------------------------------------------------------------------------------------------------------------------------------------------------------------------------------------------------------------------------------------------------------------------------------------------------------------------------------------------------------------------------------------------------------------------------------------------------------------------------------------------------------------------------------------------------------------------------------------------------------------------------------------------------------------------------|-------------------------------------------------------------------------------------------------------------------------------------------|-------------------|----------------------------------------------------------------------------------------------------------------------------------------------------------------------------------------------------------------------------------------------------------------------------------------------------------------------------------------------------------------------------------------------------------------------------------------------------------------------------------------------------------------------------------------------------------------------------------------------------------------------------------------------------------------------------------------------------------------------------------------------------------------------------------------------------------------------------------------------------------------------------------------|---------------------------------------------------------------------------------------------------------------------------------------------------------------------------------------------------------------------------------------------------------------------------------------------------------------------------------------------------------------------------------------------------------------------------------------------------------------------------------------------------------------------------------------------------------------------------------------------------------------------------------------------------------------------------|
|                                                                                                                                                                                      |                                                                                                                                                                                                                                                                                                                                                                                                                                                                                                                                                                                                                                                                                                                                                                                                                                                                                                      |                                                                                                                                           |                   | <ul style="list-style-type: none"> <li>BMI (&lt;18.5 kg/m<sup>2</sup> HR: 1.22, 25-29.99 kg/m<sup>2</sup> HR: 1.11, 30-34.99 kg/m<sup>2</sup> HR: 1.36, &gt;35 kg/m<sup>2</sup> HR: 1.69, Ref 18.5-24.99 kg/m<sup>2</sup>)</li> <li>Socio-economic quintiles: IMD Quintile (II HR: 1.03, III HR: 1.05, IV HR: 1.10, V HR: 1.16, Unknown HR:0.94, Ref IMD Quintile I)</li> <li>Number of comorbidities (1 HR: 1.27, 2 HR: 1.46, 3 HR: 1.60, 4 HR 1.71, 5 HR: 1.85, Ref 0 comorbidity)</li> </ul>                                                                                                                                                                                                                                                                                                                                                                                        |                                                                                                                                                                                                                                                                                                                                                                                                                                                                                                                                                                                                                                                                           |
| <p><b>Authors:</b><br/>Osborn et al. <sup>79</sup></p> <p><b>Year published:</b><br/>2011</p> <p><b>Study design:</b><br/>Cohort study</p> <p><b>Country:</b><br/>United Kingdom</p> | <p><b>Sample size:</b><br/>N=18,696 (with SMI) and 95,512 (without SMI)</p> <p><b>Inclusion criteria:</b></p> <ul style="list-style-type: none"> <li>Patients aged ≥18 years before or during the study period with at least 6 months of follow up data</li> <li>Study group: patients who had SMI diagnosis based on the READ code list</li> <li>Comparison group: patients who did not have a SMI diagnosis</li> </ul> <p><b>Exclusion criteria:</b></p> <ul style="list-style-type: none"> <li>Patients with pre-existing CVD and patients who registered but had no further record of attendance at the practice</li> </ul> <p><b>Setting and population:</b></p> <ul style="list-style-type: none"> <li>Records from practices which had reached pre-defined THIN Quality Standard contributing to the primary care databases THIN in the UK, between January 2000 and December 2007</li> </ul> | <p><b>1. Factors associated with screening of BMI:</b></p> <ul style="list-style-type: none"> <li>Presence of SMI</li> <li>Age</li> </ul> | Screened for BMI  | <p><b>Statistical analysis:</b></p> <ul style="list-style-type: none"> <li>Descriptive for proportions</li> <li>Poisson regression to estimate IRR for BMI recording, adjusted for screened for BMI by age 18-59y and ≥60y subgroups</li> </ul> <p><b>Results/effects estimates:</b></p> <p>Proportion of SMI patients who were screened for BMI:</p> <ul style="list-style-type: none"> <li>13.6% in 2000, 14.9% in 2001, 16.1% in 2002, 18.6% in 2003, 24.0% in 2004, 26.1% in 2005, 32.9% in 2006 and 36.9% in 2007</li> </ul> <p>1. Predictors associated with screening of BMI in patients with SMI in comparison to patients without SMI:</p> <ul style="list-style-type: none"> <li>People aged 18-59y (IRR: 0.599 in 2000, 0.615 in 2003 and 0.793 in 2005)</li> <li>People aged 60y and above (IRR: 0.571 in 2000, 0.533 in 2003, 0.657 in 2005 and 0.808 in 2007)</li> </ul> | <p><b>Author's conclusions:</b></p> <p>“In UK primary care, people with SMI over 60 years of age remain less likely than the general population to receive annual CVD screening despite higher risk of developing CVD.”</p> <p><b>Reviewer's comments:</b></p> <p>This study shows having SMI in age group 18-59 years is negatively associated with BMI screening until 2005, however, they were equally likely to be screened in 2007. However, patients with SMI who were aged 60 years and above were less likely to have a BMI screening.</p> <p>This study has clearly met 8/10 (80%) criteria in the critical appraisal tool. One of the criteria was unclear.</p> |
| <p><b>Authors:</b><br/>Rose et al. <sup>80</sup></p>                                                                                                                                 | <p><b>Sample size:</b><br/>N= 79,947</p> <p><b>Inclusion criteria:</b></p>                                                                                                                                                                                                                                                                                                                                                                                                                                                                                                                                                                                                                                                                                                                                                                                                                           | <p><b>1. Factors associated with BMI Documentation:</b></p> <ul style="list-style-type: none"> <li>Sex</li> <li>Race</li> </ul>           | BMI Documentation | <p><b>Statistical analysis:</b></p> <ul style="list-style-type: none"> <li>Descriptive for proportions</li> <li>Chi-square to test association between the variables and the BMI documentation (not relevant to calculated RR below).</li> </ul>                                                                                                                                                                                                                                                                                                                                                                                                                                                                                                                                                                                                                                       | <p><b>Author's conclusions:</b></p> <p>“In a large primary care network BMI documentation has been incomplete and for</p>                                                                                                                                                                                                                                                                                                                                                                                                                                                                                                                                                 |

|                                                                                                                                                                                             |                                                                                                                                                                                                                                                                                                                                                                                                                                                                                                                                                                                                                                                                                                                                                                                 |                                                                                                                                                                                                                                                                                                                                                                                |                                                 |                                                                                                                                                                                                                                                                                                                                                                                                                                                                                                                                                                                                                                                                                                                                                                                                    |                                                                                                                                                                                                                                                                                                                                                                                                                                                                       |
|---------------------------------------------------------------------------------------------------------------------------------------------------------------------------------------------|---------------------------------------------------------------------------------------------------------------------------------------------------------------------------------------------------------------------------------------------------------------------------------------------------------------------------------------------------------------------------------------------------------------------------------------------------------------------------------------------------------------------------------------------------------------------------------------------------------------------------------------------------------------------------------------------------------------------------------------------------------------------------------|--------------------------------------------------------------------------------------------------------------------------------------------------------------------------------------------------------------------------------------------------------------------------------------------------------------------------------------------------------------------------------|-------------------------------------------------|----------------------------------------------------------------------------------------------------------------------------------------------------------------------------------------------------------------------------------------------------------------------------------------------------------------------------------------------------------------------------------------------------------------------------------------------------------------------------------------------------------------------------------------------------------------------------------------------------------------------------------------------------------------------------------------------------------------------------------------------------------------------------------------------------|-----------------------------------------------------------------------------------------------------------------------------------------------------------------------------------------------------------------------------------------------------------------------------------------------------------------------------------------------------------------------------------------------------------------------------------------------------------------------|
| <p><b>Year published:</b><br/>2009</p> <p><b>Study design:</b><br/>Cross-sectional study</p> <p><b>Country:</b><br/>United States</p>                                                       | <ul style="list-style-type: none"> <li>• Patients aged <math>\geq 18</math> years before or during the study period</li> <li>• Patient who had at least two clinic visits billed to their PCP during study period</li> </ul> <p><b>Exclusion criteria:</b></p> <ul style="list-style-type: none"> <li>• Patients with who had a height greater than or equal to 2.13 meters, weight <math>&lt; 31.8</math> or <math>&gt; 453.6</math> kg, systolic BP <math>&lt; 50</math> or <math>&gt; 260</math> mmHg, or diastolic BP <math>&lt; 30</math> or <math>&gt; 150</math> mmHg.</li> </ul> <p><b>Setting and population:</b><br/>Records from Massachusetts General Hospital Primary Care Practice Based Research Network in the US, between July 2005 to December 2006</p>       | <ul style="list-style-type: none"> <li>• Commercial Insurance or Medicare</li> <li>• History of CVD</li> <li>• History of diabetes</li> <li>• History of hypertension</li> <li>• History of dyslipidemia</li> </ul>                                                                                                                                                            |                                                 | <p><b>Results/effects estimates:</b><br/>Proportion of patients with BMI documentation between July 2005 to December 2006:</p> <ul style="list-style-type: none"> <li>• 60.5% had weight and height recording</li> </ul> <p>1. Factors associated with BMI documentation:</p> <ul style="list-style-type: none"> <li>• Female (Calculated RR*: 1.27 Ref male)</li> <li>• Race (Non-White Calculated RR*: 1.05, Ref White)</li> <li>• History of CVD: Yes (Calculated RR*: 0.98 Ref No)</li> <li>• History of diabetes: Yes (Calculated RR*: 1.05, Ref No)</li> <li>• History of hypertension: Yes (Calculated RR*: 0.99 Ref No)</li> <li>• History of dyslipidemia: Yes (Calculated RR*: 0.98, Ref No)</li> </ul>                                                                                  | <p>patients with BMI measured, risk factor control has been poorer in obese patients compared with NW, even in those with obesity and CVD or diabetes. Better knowledge of BMI could provide an opportunity for improved quality in obesity care.”</p> <p><b>Reviewer’s comments:</b><br/>This study shows female sex, Hispanic and black race, having commercial insurance or medicare and history of diabetes is positively associated in BMI documentation.</p>    |
| <p><b>Authors:</b><br/>Ruser et al. <sup>81</sup></p> <p><b>Year published:</b><br/>2005</p> <p><b>Study design:</b><br/>Cross-sectional study</p> <p><b>Country:</b><br/>United States</p> | <p><b>Sample size:</b><br/>N= 424</p> <p><b>Inclusion criteria:</b></p> <ul style="list-style-type: none"> <li>• Patient who had at least 1 primary care visit during study period</li> <li>• Patients classified with overweight (BMI <math>\geq 25</math> kg/m<sup>2</sup>) or obesity (BMI <math>\geq 30</math> kg/m<sup>2</sup>)</li> </ul> <p><b>Exclusion criteria:</b></p> <ul style="list-style-type: none"> <li>• Patients were excluded if they were born before 1938,</li> <li>• Patients were not classified with overweight nor obesity (BMI <math>&lt; 25</math> kg/m<sup>2</sup>),</li> <li>• Patient who had a life expectancy <math>&lt; 6</math> months</li> <li>• Patients with no routine visits with primary clinician during the study period.</li> </ul> | <p><b>Factors associated with Identification or management of overweight and obesity:</b></p> <ul style="list-style-type: none"> <li>• Age</li> <li>• Race</li> <li>• Sex</li> <li>• Height</li> <li>• Weight</li> <li>• Co-morbidities</li> <li>• Smoking</li> <li>• Alcohol use <math>&gt; 2</math> drinks/day for men or <math>&gt; 1</math> drink/day for women</li> </ul> | <p>Identification of overweight and obesity</p> | <p><b>Statistical analysis:</b></p> <ul style="list-style-type: none"> <li>• Descriptive statistics for proportions</li> <li>• Logistic regression to estimate OR for identification of overweight and obesity, adjusted for covariates</li> </ul> <p><b>Results/effects estimates:</b><br/>Proportions of patients who had ICD-9 codes for overweight or obesity:</p> <ul style="list-style-type: none"> <li>• 13 of 178 (7.3%) patients classified with overweight in overweight group or 76 of 246 (30.9%) patients classified with obesity in obesity group.</li> </ul> <p>1. Predictors of Identification of overweight and obesity</p> <ul style="list-style-type: none"> <li>• BMI category (BMI <math>\geq 30</math>kg/m<sup>2</sup> OR: 7.51, Ref BMI 25–29.9kg/m<sup>2</sup>)</li> </ul> | <p><b>Author’s conclusions:</b><br/>“Our results suggest that Internal Medicine residents markedly underrecognize and undertreat overweight and obesity.”</p> <p><b>Reviewer’s comments:</b><br/>This study shows having a BMI <math>\geq 30</math>kg/m<sup>2</sup> is positively associated with identification of overweight and obesity.</p> <p>This study has clearly met 6/8 (75%) criteria in the critical appraisal tool. Two of the criteria was unclear.</p> |

|                                                                                                                                                                                                       |                                                                                                                                                                                                                                                                                                                                                                                                                                                                                                                                                                                                                                                           |                                                                                                                                                                                                                                                                                                                                                                                                                                                                                                                 |                          |                                                                                                                                                                                                                                                                                                                                                                                                                                                                                                                                                                                                                                                                                                                                                                                                                                                                                                                                                                                                                                                                                                                                                                                                                                                                                                                                               |                                                                                                                                                                                                                                                                                                                                                                                                                                                                                                                                                                                                                                                                                     |
|-------------------------------------------------------------------------------------------------------------------------------------------------------------------------------------------------------|-----------------------------------------------------------------------------------------------------------------------------------------------------------------------------------------------------------------------------------------------------------------------------------------------------------------------------------------------------------------------------------------------------------------------------------------------------------------------------------------------------------------------------------------------------------------------------------------------------------------------------------------------------------|-----------------------------------------------------------------------------------------------------------------------------------------------------------------------------------------------------------------------------------------------------------------------------------------------------------------------------------------------------------------------------------------------------------------------------------------------------------------------------------------------------------------|--------------------------|-----------------------------------------------------------------------------------------------------------------------------------------------------------------------------------------------------------------------------------------------------------------------------------------------------------------------------------------------------------------------------------------------------------------------------------------------------------------------------------------------------------------------------------------------------------------------------------------------------------------------------------------------------------------------------------------------------------------------------------------------------------------------------------------------------------------------------------------------------------------------------------------------------------------------------------------------------------------------------------------------------------------------------------------------------------------------------------------------------------------------------------------------------------------------------------------------------------------------------------------------------------------------------------------------------------------------------------------------|-------------------------------------------------------------------------------------------------------------------------------------------------------------------------------------------------------------------------------------------------------------------------------------------------------------------------------------------------------------------------------------------------------------------------------------------------------------------------------------------------------------------------------------------------------------------------------------------------------------------------------------------------------------------------------------|
|                                                                                                                                                                                                       | <p><b>Setting and population:</b></p> <ul style="list-style-type: none"> <li>Records of 2 resident clinics of the Yale Internal Medicine Residency Programs (the Family Health Center, St. Mary's Hospital, Waterbury, Conn and the VA Connecticut Healthcare System Primary Care Clinic, West Haven, Conn) between 1 September 2001 and 31 July 2002.</li> </ul>                                                                                                                                                                                                                                                                                         |                                                                                                                                                                                                                                                                                                                                                                                                                                                                                                                 |                          |                                                                                                                                                                                                                                                                                                                                                                                                                                                                                                                                                                                                                                                                                                                                                                                                                                                                                                                                                                                                                                                                                                                                                                                                                                                                                                                                               |                                                                                                                                                                                                                                                                                                                                                                                                                                                                                                                                                                                                                                                                                     |
| <p><b>Authors:</b><br/>Turner, Harris &amp; Mazza <sup>82</sup></p> <p><b>Year published:</b><br/>2015</p> <p><b>Study design:</b><br/>Cross sectional study</p> <p><b>Country:</b><br/>Australia</p> | <p><b>Sample size:</b><br/>N=270,426</p> <p><b>Inclusion criteria:</b></p> <ul style="list-style-type: none"> <li>Patients aged ≥18 years before or during the study period</li> <li>Patients who had visited the same practice more than three times in the previous 2 years</li> </ul> <p><b>Exclusion criteria:</b><br/>None</p> <p><b>Setting and population:</b></p> <ul style="list-style-type: none"> <li>Records from Melbourne East Monash General Practice Database (MAGNET), a primary care database of 78 participating general practice clinics in the inner-eastern region of Melbourne between 1 July 2011 and 31 December 2013</li> </ul> | <p><b>1. Factors associated with BMI documentation:</b></p> <ul style="list-style-type: none"> <li>Age</li> <li>Sex</li> <li>Number of diagnoses recorded</li> <li>Specific diagnosis recorded: hypertension, hyperlipidaemia, musculoskeletal problems, depression and anxiety, diabetes, cardiovascular disease, stroke, and kidney disease</li> <li>Prescription of medication related to diabetes, depression and anxiety, blood pressure and cardiovascular disease, lipids, and anticoagulants</li> </ul> | <p>BMI documentation</p> | <p><b>Statistical analysis:</b></p> <ul style="list-style-type: none"> <li>Descriptive for proportions</li> <li>Logistic regression to estimate odd's ratio (OR) for documentation of BMI, adjusted for covariates</li> </ul> <p><b>Results/effects estimates:</b><br/>Proportion of patients with an anthropometric measurement recording between 1 July 2011 and 31 December 2013:</p> <ul style="list-style-type: none"> <li>36.9% had height records</li> <li>25.8% had weight records</li> <li>4.3% had WC records</li> <li>22.2% had BMI documented</li> </ul> <p>1. Predictors of BMI documentation:</p> <ul style="list-style-type: none"> <li>Age (≥75y OR: 1.60, 65-74y OR: 1.20, 45-64y OR: 1.31, Ref 19-44y)</li> <li>Sex: Female (OR: 0.86, Ref male)</li> <li>Number of diagnosis recorded (1 OR: 1.25, 2 OR: 1.45, ≥3 OR: 1.69, Ref 0 comorbidity)</li> <li>Specific diagnosis recorded (hypertension OR: 1.18, hyperlipidaemia OR: 1.26, musculoskeletal problems OR: 1.07, depression and anxiety OR: 0.94, diabetes OR: 1.85, cardiovascular disease OR: 0.91, stroke OR: 0.87, Ref 'no' for each diagnosis)</li> <li>Prescription of medication related to specific diagnosis (blood pressure/cardiovascular disease OR: 1.07, depression and anxiety OR: 1.07, diabetes OR: 1.24, Ref 'no' for each diagnosis)</li> </ul> | <p><b>Author's conclusions:</b><br/>"Recording of measures of obesity in general practice is currently not consistent with guideline recommendations. Strategies to support general practitioners may improve their documentation of measures of obesity."</p> <p><b>Reviewer's comments:</b><br/>This study shows that socio demographics (older age and male sex), increasing number of chronic medical conditions, diagnosis of chronic medical conditions, and medications for CVD or blood pressure, diabetes, depression/anxiety were positively associated with BMI documentation.</p> <p>This study has clearly met 8/8 (100%) criteria in the critical appraisal tool.</p> |
| <p><b>Authors:</b></p>                                                                                                                                                                                | <p><b>Sample size:</b><br/>N=3,446</p>                                                                                                                                                                                                                                                                                                                                                                                                                                                                                                                                                                                                                    | <p><b>1. Factors associated with weight measurement:</b></p>                                                                                                                                                                                                                                                                                                                                                                                                                                                    | <p>Weight records</p>    | <p><b>Statistical analysis:</b></p> <ul style="list-style-type: none"> <li>Descriptive for proportions</li> </ul>                                                                                                                                                                                                                                                                                                                                                                                                                                                                                                                                                                                                                                                                                                                                                                                                                                                                                                                                                                                                                                                                                                                                                                                                                             | <p><b>Author's conclusions:</b></p>                                                                                                                                                                                                                                                                                                                                                                                                                                                                                                                                                                                                                                                 |

|                                                                                                                                                             |                                                                                                                                                                                                                                                                                                                                                                                                                                                                                                                                                                                                                                                                                                                                                                                                                                                                                                                                                                                                                                                      |                                                                                                                                                                                                                                                                                                                        |                                                     |                                                                                                                                                                                                                                                                                                                                                                                                                                                                                                                                                                                                                                                                                                                                                                                                                                                                                                                                                                                                                 |                                                                                                                                                                                                                                                                                                                                                                                                                                                                                                                                                                                                                                                                                                                                                                                                                                                                                                                                                                                                   |
|-------------------------------------------------------------------------------------------------------------------------------------------------------------|------------------------------------------------------------------------------------------------------------------------------------------------------------------------------------------------------------------------------------------------------------------------------------------------------------------------------------------------------------------------------------------------------------------------------------------------------------------------------------------------------------------------------------------------------------------------------------------------------------------------------------------------------------------------------------------------------------------------------------------------------------------------------------------------------------------------------------------------------------------------------------------------------------------------------------------------------------------------------------------------------------------------------------------------------|------------------------------------------------------------------------------------------------------------------------------------------------------------------------------------------------------------------------------------------------------------------------------------------------------------------------|-----------------------------------------------------|-----------------------------------------------------------------------------------------------------------------------------------------------------------------------------------------------------------------------------------------------------------------------------------------------------------------------------------------------------------------------------------------------------------------------------------------------------------------------------------------------------------------------------------------------------------------------------------------------------------------------------------------------------------------------------------------------------------------------------------------------------------------------------------------------------------------------------------------------------------------------------------------------------------------------------------------------------------------------------------------------------------------|---------------------------------------------------------------------------------------------------------------------------------------------------------------------------------------------------------------------------------------------------------------------------------------------------------------------------------------------------------------------------------------------------------------------------------------------------------------------------------------------------------------------------------------------------------------------------------------------------------------------------------------------------------------------------------------------------------------------------------------------------------------------------------------------------------------------------------------------------------------------------------------------------------------------------------------------------------------------------------------------------|
| <p>Verberne et al.<sup>83</sup></p> <p><b>Year published:</b> 2018</p> <p><b>Study design:</b> Cross sectional study</p> <p><b>Country:</b> Netherlands</p> | <p><b>Inclusion criteria:</b></p> <ul style="list-style-type: none"> <li>• Patients born between 1945-1981 and registered in one of the participating general practices in NIVEL Primary Care Database</li> </ul> <p><b>Exclusion criteria:</b></p> <ul style="list-style-type: none"> <li>• Patients having incomplete registration in general practice</li> <li>• Patients with missing data on height and/or weight in the baseline questionnaire of the AMIGO study</li> <li>• Patients not having consultation with their GP in 2012</li> <li>• Patients having self-reported BMI &lt; 25 kg/m<sup>2</sup></li> <li>• Patients from general practices having poor data quality or unavailability of data</li> </ul> <p><b>Setting and population:</b></p> <ul style="list-style-type: none"> <li>• Records from NIVEL Primary Care Database combined with records from AMIGO study</li> <li>• Participants for this study were recruited through 99 general practices that participated in the NIVEL-PCD in April 2011 and July 2012</li> </ul> | <ul style="list-style-type: none"> <li>• Sex</li> <li>• Age</li> <li>• Educational level</li> <li>• BMI</li> <li>• Smoking status</li> <li>• Drinking status</li> <li>• Absence or presence of chronic condition</li> <li>• Presence of cardiovascular disorder, osteoarthritis, diabetes mellitus and COPD</li> </ul> |                                                     | <ul style="list-style-type: none"> <li>• Multiple logistic multilevel regression to estimate OR for weight record, adjusted for covariates (Model 2)</li> </ul> <p><b>Results/effects estimates:</b></p> <p>Proportion of patients with an anthropometric measurement:</p> <ul style="list-style-type: none"> <li>• 23% had BMI recordings (height and weight) in 2012</li> <li>• 58% had at least one weight recording from 2012 to 2015</li> </ul> <p>1 Predictors of weight recording:</p> <ul style="list-style-type: none"> <li>• Age (61-67y OR: 2.53, 51-60y OR: 2.26, 41-50y OR: 1.81, Ref 31-40y)</li> <li>• Educational Level (high OR: 0.70, intermediate OR: 0.83, Ref low)</li> <li>• BMI category: ≥ 30 kg/m<sup>2</sup> (OR: 1.25, Ref ≥ 25 and &lt; 30 kg/m<sup>2</sup>)</li> <li>• Chronic condition: ‘no’ (OR: 0.39, Ref ‘yes’)</li> <li>• Specific diagnosis recorded (cardiovascular disorder OR: 3.16, diabetes mellitus OR: 10.27, COPD OR: 2.00, Ref ‘no’ for each diagnosis)</li> </ul> | <p>“Weight was frequently recorded for overweight patients with a chronic condition, for whom regular weight measurement is recommended in clinical guidelines, and for which weight recording is a performance indicator as part of the payment system. For younger patients and those without a chronic condition related to being overweight, weight was less frequently recorded. For these patients, routine recording of weight in EHRs deserves more attention, with the aim to support early recognition and treatment of overweight.”</p> <p><b>Reviewer’s comments:</b></p> <p>This study shows that socio demographics (older age and low educational level), having BMI ≥ 30 kg/m<sup>2</sup>, presence of chronic medical conditions and diagnosis of specific medical conditions (cardiovascular disorder, diabetes mellitus and COPD) were positively associated with weight recordings.</p> <p>This study has clearly met 8/8 (100%) criteria in the critical appraisal tool.</p> |
| <p><b>Authors:</b> Yoong et al.<sup>84</sup></p>                                                                                                            | <p><b>Sample size:</b> N=1,111</p> <p><b>Inclusion criteria:</b></p>                                                                                                                                                                                                                                                                                                                                                                                                                                                                                                                                                                                                                                                                                                                                                                                                                                                                                                                                                                                 | <p><b>1. Factors associated with non-identification of overweight and obesity:</b></p> <ul style="list-style-type: none"> <li>• BMI</li> </ul>                                                                                                                                                                         | <p>Non-identification of overweight and obesity</p> | <p><b>Statistical analysis:</b></p> <ul style="list-style-type: none"> <li>• Descriptive for proportions</li> <li>• Multiple logistic regression to estimate OR for non-identification of overweight and obesity for covariates</li> </ul>                                                                                                                                                                                                                                                                                                                                                                                                                                                                                                                                                                                                                                                                                                                                                                      | <p><b>Author’s conclusions:</b></p> <p>“GPs missed identifying a substantial proportion of overweight and obese patients.</p>                                                                                                                                                                                                                                                                                                                                                                                                                                                                                                                                                                                                                                                                                                                                                                                                                                                                     |

|                                                                                                                                   |                                                                                                                                                                                                                                                                                                                                                                                                                                                                                                                                         |                                                                                                                                                                                                                                                                                                                                                         |  |                                                                                                                                                                                                                                                                                                                                                                                                                                                                                                                                                                                                                                                                                            |                                                                                                                                                                                                                                                                                                                                                                                                                                                                                                                                                                    |
|-----------------------------------------------------------------------------------------------------------------------------------|-----------------------------------------------------------------------------------------------------------------------------------------------------------------------------------------------------------------------------------------------------------------------------------------------------------------------------------------------------------------------------------------------------------------------------------------------------------------------------------------------------------------------------------------|---------------------------------------------------------------------------------------------------------------------------------------------------------------------------------------------------------------------------------------------------------------------------------------------------------------------------------------------------------|--|--------------------------------------------------------------------------------------------------------------------------------------------------------------------------------------------------------------------------------------------------------------------------------------------------------------------------------------------------------------------------------------------------------------------------------------------------------------------------------------------------------------------------------------------------------------------------------------------------------------------------------------------------------------------------------------------|--------------------------------------------------------------------------------------------------------------------------------------------------------------------------------------------------------------------------------------------------------------------------------------------------------------------------------------------------------------------------------------------------------------------------------------------------------------------------------------------------------------------------------------------------------------------|
| <p><b>Year published:</b><br/>2014</p> <p><b>Study design:</b><br/>Cross sectional study</p> <p><b>Country:</b><br/>Australia</p> | <ul style="list-style-type: none"> <li>• Patients aged <math>\geq 18</math> years proving informed consent</li> <li>• Patients who completed touchscreen computer questionnaire</li> </ul> <p><b>Exclusion criteria:</b></p> <ul style="list-style-type: none"> <li>• None</li> </ul> <p><b>Setting and population:</b></p> <ul style="list-style-type: none"> <li>• Records of patients from 12 general practices randomly invited and consented to participate in the study in three urban cities in two Australian states</li> </ul> | <ul style="list-style-type: none"> <li>• Age</li> <li>• Sex</li> <li>• Presence of heart disease</li> <li>• Presence of high blood pressure</li> <li>• Presence of cholesterol</li> <li>• Presence of type 2 diabetes</li> <li>• Ethnicity</li> <li>• Had private health insurance</li> <li>• Frequency of consultation</li> <li>• Education</li> </ul> |  | <p><b>Results/effects estimates:</b></p> <p>Proportion of patients with an identification of obesity and overweight at study time:</p> <ul style="list-style-type: none"> <li>• 42% as overweight</li> <li>• 46% as having obesity</li> </ul> <p>1. Predictors of non-identification of overweight and obesity (subsample N=589):</p> <ul style="list-style-type: none"> <li>• BMI: obesity (OR: 0.1, Ref overweight)</li> <li>• Sex: male (OR: 1.7, Ref female)</li> <li>• Presence of high blood pressure: no (OR: 1.8, Ref yes)</li> <li>• Presence of type 2 diabetes: no (OR: 2.4, Ref yes)</li> <li>• Education: trade qualification/diploma (OR: 0.3, Ref HSC and below)</li> </ul> | <p>Strategies to support GPs in identifying their overweight or obese patients need to be implemented.”</p> <p><b>Reviewer’s comments:</b></p> <p>This study shows being male, absence of high blood pressure and type 2 diabetes are positively associated with non-identification of overweight and obesity. Whereas, having obesity and higher education are negatively associated with non-identification of overweight and obesity.</p> <p>This study has clearly met 7/8 (88%) criteria in the critical appraisal tool. One of the criteria was unclear.</p> |
|-----------------------------------------------------------------------------------------------------------------------------------|-----------------------------------------------------------------------------------------------------------------------------------------------------------------------------------------------------------------------------------------------------------------------------------------------------------------------------------------------------------------------------------------------------------------------------------------------------------------------------------------------------------------------------------------|---------------------------------------------------------------------------------------------------------------------------------------------------------------------------------------------------------------------------------------------------------------------------------------------------------------------------------------------------------|--|--------------------------------------------------------------------------------------------------------------------------------------------------------------------------------------------------------------------------------------------------------------------------------------------------------------------------------------------------------------------------------------------------------------------------------------------------------------------------------------------------------------------------------------------------------------------------------------------------------------------------------------------------------------------------------------------|--------------------------------------------------------------------------------------------------------------------------------------------------------------------------------------------------------------------------------------------------------------------------------------------------------------------------------------------------------------------------------------------------------------------------------------------------------------------------------------------------------------------------------------------------------------------|

**Notes:**  
Only significant predictors or those included in meta-analysis were reported in the results section of this table. The statistical significance was confirmed using a significance level of at 5% (p=0.05 or less) or the corresponding confidence level within 95%. \* The prevalence ratio was calculated by the authors of this review. # We assumed most of the study sample was aged 18 years and over based on the reported mean (SD) age of 49.4 (18.5)

**Abbreviations:**  
AMIGO: Occupational and Environmental Health Cohort; BP: Blood Pressure; BMI: Body Mass Index; CCI, Charlson Comorbidity Index; CHS, Clalit Health Services; CI: Confidence Interval; COPD: Chronic Obstructive Pulmonary Disease; CVD: Cardio-Vascular Disease; EMR, Electronic Medical Records; EHR: Electronic Health Record; GP: General Practitioner; GPRD: General Practice Research Database; HCP: Health Care Professional/Practitioner; HR: Hazard Ratio; HYDRA: Hypertension and Diabetes Screening and Awareness; IBD: Inflammatory Bowel Disease; ICD: International Classification of Disease; IMD: Index of Multiple Deprivation; IRR: Incident Rate Ratio; IRSD: Index for Relative Socioeconomic Disadvantage; NCRAS: National Cancer Registration and Analysis Service; NP: Nurse Practitioner; ONS: Office for National Statistics; OR: Odd Ratio; OW: Overweight; PA: Physician Assistant; PCP: Primary Care Physician; PR: Prevalence Ratio; RA: Rheumatoid Arthritis; Ref: Reference category; SEIFA: Socio-Economic Indexes for Areas; SMI: Severe Mental Illness; SPDS: Sentinel Practices Data Sourcing; THIN: The Health Improvement Network; WC: Waist Circumference; y: years;

**Definitions:**  
Biological sex of participants is denoted by the factor “sex”, we have assumed “gender” and “sex” as an interchangeable factor while reporting on the studies.  
Educational level: low = vocational education/ community college; intermediate = vocational/high school; high = college/university or higher  
Index of Multiple Deprivation (IMD) Quintile I = least deprived; IMD Quintile V = most deprived.  
READ is the Read Coded Clinical Terms code to identify the primary diagnosis.

Supplementary Table S4: Characteristics and summary of qualitative studies reviewed

| Study details                                                                                                                            | Population and setting                                                                                                                                                                                                                                                                                                                                                                                                                                                                   | Study design, aims and methods                                                                                                                                                                                                                                                                                                                                   | Main themes and subthemes with explanations                                                                                                                                                                                                                                                                                                                                                                                                                                                                                                                                                                                                                                                                                                                                                                                                                                                                                                                                                                                                                                                                                                                                                                                                                                                                                                                                                                                                                                                                                                                                                                                                                                                                                                                                                                                                                                                                                                                                                                                                                                                                                                                                                                                                                                                                                                                                                | Author’s conclusions and reviewer’s comments                                                                                                                                                                                                                                                                                                                                                                                                                                                                                                                                                                                                                                                                                                                                                                                                                                                                                                                      |
|------------------------------------------------------------------------------------------------------------------------------------------|------------------------------------------------------------------------------------------------------------------------------------------------------------------------------------------------------------------------------------------------------------------------------------------------------------------------------------------------------------------------------------------------------------------------------------------------------------------------------------------|------------------------------------------------------------------------------------------------------------------------------------------------------------------------------------------------------------------------------------------------------------------------------------------------------------------------------------------------------------------|--------------------------------------------------------------------------------------------------------------------------------------------------------------------------------------------------------------------------------------------------------------------------------------------------------------------------------------------------------------------------------------------------------------------------------------------------------------------------------------------------------------------------------------------------------------------------------------------------------------------------------------------------------------------------------------------------------------------------------------------------------------------------------------------------------------------------------------------------------------------------------------------------------------------------------------------------------------------------------------------------------------------------------------------------------------------------------------------------------------------------------------------------------------------------------------------------------------------------------------------------------------------------------------------------------------------------------------------------------------------------------------------------------------------------------------------------------------------------------------------------------------------------------------------------------------------------------------------------------------------------------------------------------------------------------------------------------------------------------------------------------------------------------------------------------------------------------------------------------------------------------------------------------------------------------------------------------------------------------------------------------------------------------------------------------------------------------------------------------------------------------------------------------------------------------------------------------------------------------------------------------------------------------------------------------------------------------------------------------------------------------------------|-------------------------------------------------------------------------------------------------------------------------------------------------------------------------------------------------------------------------------------------------------------------------------------------------------------------------------------------------------------------------------------------------------------------------------------------------------------------------------------------------------------------------------------------------------------------------------------------------------------------------------------------------------------------------------------------------------------------------------------------------------------------------------------------------------------------------------------------------------------------------------------------------------------------------------------------------------------------|
| <p><b>Authors:</b><br/>Dunkley et al. <sup>85</sup></p> <p><b>Year published:</b><br/>2009</p> <p><b>Country:</b><br/>United Kingdom</p> | <p><b>Number of participants:</b><br/>10 HCPs (4 PNs, 6 GPs) and 18 patients</p> <p><b>Inclusion criteria:</b><br/>HCPs:<br/>• All GPs and PNs in participating practices<br/>Patients:<br/>• Speak and understand English and/or Gujarati<br/>• Aged 25-75 years</p> <p><b>Exclusion criteria:</b><br/>None</p> <p><b>Setting and population:</b><br/>• General practices in Leicestershire, UK<br/>• Practices were diverse in size and location, with ethnically diverse patients</p> | <p>Qualitative study conducted using purposive sampling, in-depth, semi-structured interviews and thematic analysis.</p> <p><b>Aims:</b><br/>The study aimed to explore the views of patients and HCPs towards waist size measurement, including identification of possible barriers to carrying out this assessment in a multi-ethnic primary care setting.</p> | <p><b>Theme 1:</b><br/>Understanding of waist size measurement to assess or monitor risk</p> <ul style="list-style-type: none"> <li>• HCPs demonstrated awareness of large waist size and risk of diabetes</li> <li>• Association of waist circumference with central obesity was less frequently raised</li> <li>• Awareness of ethnic subspecific recommendations was poor</li> <li>• Nearly half of the patients demonstrated no knowledge on the importance of waist circumference measurement and associated risk of high measurements</li> <li>• Some patients demonstrated perception of denial of the association of body size and health</li> </ul> <p><b>Theme 2:</b><br/>Attitudes related to perceived barriers and facilitators to waist measurement</p> <p><b>Subtheme 1: Standardisation and training needs</b></p> <ul style="list-style-type: none"> <li>• Most HCPs stated no <i>specific training</i> was provided related to implementing WCM</li> <li>• Concerns of HCPs were <i>lack of knowledge</i> on positioning the tape, lack of repeatability, operator variability and interpretation of results</li> </ul> <p><b>Subtheme 2: Perceived usefulness</b></p> <ul style="list-style-type: none"> <li>• Most HCPs agreed WCM was more useful than BMI and stated the need of this assessment in addition to BMI</li> <li>• Some HCPs felt patients are <i>not familiar</i> with waist size and may not understand how it relates to health risks</li> <li>• Some HCPs stated waist measurement was something that could <i>motivate</i> patients to make lifestyle changes</li> <li>• Majority of patients acknowledged the <i>importance of WCM</i> in identifying health problems and facilitating healthy lifestyle changes and thought it would be beneficial for their HCP to know their WCM</li> </ul> <p><b>Subtheme 3: Personal feelings</b></p> <ul style="list-style-type: none"> <li>• For some HCPs, the <i>perceived intimate nature</i> of WCM appeared to be a barrier</li> <li>• <i>HCPs being comfortable</i> appeared to be positively associated with increased experience of measuring waist size and negatively with patients having overweight or obesity</li> <li>• HCPs felt that <i>patients might feel uncomfortable</i> or be embarrassed</li> <li>• Few HCPs demonstrated <i>preconceived ideas</i> about cultural groups</li> </ul> | <p><b>Author’s conclusions:</b><br/>“This study adds to our understanding of views on WCM in a multi-ethnic setting, highlighting factors for consideration if WCM is to be facilitated in routine practice.”</p> <p><b>Reviewer’s comments:</b></p> <ul style="list-style-type: none"> <li>• This study revealed several barriers to implementing WC measurement including lack of knowledge and specific training, negative perceptions about its usefulness, clinical importance, and acceptability (time and cost among HCPs; comfortableness, appearance, and hygiene concerns among their patients)</li> <li>• Perceived enablers of WC measurement include its usefulness to motivate healthy behavioural changes among patients, financial and organisational incentives for HCPs</li> <li>• Findings were consistent across GPs, PNs, and ethnic groups</li> </ul> <p>This study has clearly met 7/10 (70%) criteria in the critical appraisal tool.</p> |

|                                                                                                                                        |                                                                                                                                                                                                                                                                                                                                                                                                                                                                                                                                                                             |                                                                                                                                                                                                                                                                                        |                                                                                                                                                                                                                                                                                                                                                                                                                                                                                                                                                                                                                                                                                                                                                                                                                                                                                                                                                                                                                                                                                                                                                                               |                                                                                                                                                                                                                                                                                                                                                                                                                                                                                                                                                                        |
|----------------------------------------------------------------------------------------------------------------------------------------|-----------------------------------------------------------------------------------------------------------------------------------------------------------------------------------------------------------------------------------------------------------------------------------------------------------------------------------------------------------------------------------------------------------------------------------------------------------------------------------------------------------------------------------------------------------------------------|----------------------------------------------------------------------------------------------------------------------------------------------------------------------------------------------------------------------------------------------------------------------------------------|-------------------------------------------------------------------------------------------------------------------------------------------------------------------------------------------------------------------------------------------------------------------------------------------------------------------------------------------------------------------------------------------------------------------------------------------------------------------------------------------------------------------------------------------------------------------------------------------------------------------------------------------------------------------------------------------------------------------------------------------------------------------------------------------------------------------------------------------------------------------------------------------------------------------------------------------------------------------------------------------------------------------------------------------------------------------------------------------------------------------------------------------------------------------------------|------------------------------------------------------------------------------------------------------------------------------------------------------------------------------------------------------------------------------------------------------------------------------------------------------------------------------------------------------------------------------------------------------------------------------------------------------------------------------------------------------------------------------------------------------------------------|
|                                                                                                                                        |                                                                                                                                                                                                                                                                                                                                                                                                                                                                                                                                                                             |                                                                                                                                                                                                                                                                                        | <ul style="list-style-type: none"> <li>• Patients did not think that they would be embarrassed or feel uncomfortable about having their waist measured</li> <li>• Few female patients stated <i>preference for being measured by a female HCP</i>, but this was not seen as essential</li> </ul> <p><b>Subtheme 4: Practical considerations</b></p> <ul style="list-style-type: none"> <li>• Majority of HCPs mentioned <i>time as a barrier</i> in relation to appointment length and extra workload associated</li> <li>• Majority of HCPs raised <i>cost implications</i> as a barrier in implementation of WCM</li> <li>• HCPs suggested inclusion of WCM in the Quality and Outcomes Framework (QoF) as a <i>potential incentive</i> along with <i>organisational incentives</i> for implementing WCM</li> <li>• <i>Patient's concerns</i> included perceptions about hygiene, the need to wear appropriate clothing, time implications and a perceived need for the opportunity to consider whether it would be appropriate to bring children to the appointment</li> </ul>                                                                                             |                                                                                                                                                                                                                                                                                                                                                                                                                                                                                                                                                                        |
| <p><b>Authors:</b><br/>Gaynor et al. <sup>86</sup></p> <p><b>Year published:</b><br/>2018</p> <p><b>Country:</b><br/>United States</p> | <p><b>Number of participants:</b><br/>7 PC Providers (5 NPs; 1 Doctor of Medicine; 1 Doctor of Osteopathy) attended interviews.<br/>30 PCPs (Doctor of Medicine, Doctor of Osteopathy, NPs and 1 physician assistant) completed the surveys.</p> <p><b>Inclusion criteria:</b></p> <ul style="list-style-type: none"> <li>• PC providers</li> </ul> <p><b>Exclusion criteria:</b><br/>None</p> <p><b>Setting and population:</b></p> <ul style="list-style-type: none"> <li>• 6 PC practices in South-eastern Pennsylvania, New Castle and Kent County, Delaware</li> </ul> | <p>Explanatory mixed-methods design.<br/>Qualitative component involved purposive sampling, semi-structured interviews and thematic analysis.</p> <p><b>Aims:</b><br/>The study aimed to gain a deeper understanding of waist circumference measurement rejection in primary care.</p> | <p><b>Theme 1:</b><br/>Innovation characteristics</p> <ul style="list-style-type: none"> <li>• WCM did not offer greater advantage, compatibility, ease of use, or ease of trial over BMI</li> <li>• Disadvantages of WCM included time associated with obtaining and documenting measurement, discomfort with measuring a patient's WCM, lack of knowledge and training re technique, lack of equipment (i.e., tape measures)</li> </ul> <p><b>Theme 2:</b><br/>Communication channels and the social system</p> <ul style="list-style-type: none"> <li>• Peer-to-peer communications had the greatest influence on provider use of measurements, followed by formal education and clinical experiences, experiences with preceptors, webinars, apps and conferences, and professional journals</li> </ul> <p><b>Theme 3:</b><br/>Time, comfort and practice norms</p> <ul style="list-style-type: none"> <li>• Lack of time served as a barrier to adopting WCM</li> <li>• Measurements were taken if part of routine practice</li> <li>• PC providers expressed discomfort in obtaining WCM for members of the opposite sex or people who were overweight/obese</li> </ul> | <p><b>Author's conclusions:</b><br/>"Before implementing a new initiative, WCM training modules and time efficient plans for obtaining WCM in PC settings should be piloted."</p> <p><b>Reviewer's comments:</b></p> <ul style="list-style-type: none"> <li>• Confusing presentation of qualitative results</li> <li>• Qualitative data collected in 2 group interviews and one individual interview. Unclear whether the group interviews were actually focus groups</li> </ul> <p>This study has clearly met 8/10 (80%) criteria in the critical appraisal tool.</p> |



1  
2  
3  
4  
5  
6  
7  
8  
9  
10  
11  
12  
13  
14  
15  
16  
17  
18  
19  
20  
21  
22  
23  
24  
25  
26  
27  
28  
29  
30  
31  
32  
33  
34  
35  
36  
37  
38  
39  
40  
41  
42  
43  
44  
45  
46

|                                                                                                                                         |                                                                                                                                                                                                                                                                                                                                                                                                                                                                                     |                                                                                                                                                                                                                                                                                                                                         |                                                                                                                                                                                                                                                                                                                                                                                                                                                                                                                                                                                                                                                                                                                                                                                                                                                                                                                                                                                                                                                                                                                                                                                                                                                                                                                                                                                                                                                                                                                                                                                                                                                                                                                                                                                                                                                                                                                                                                                                                                                                                                                                                                                                                                                                                                                                                                                                                                                                                                                                                                                                                                                                                                                                                                                                                               |                                                                                                                                                                                                                                                                                                                                                                                                                                                                                                                                                                                                                                                                                                                                                                                                                                                                                                                                                               |
|-----------------------------------------------------------------------------------------------------------------------------------------|-------------------------------------------------------------------------------------------------------------------------------------------------------------------------------------------------------------------------------------------------------------------------------------------------------------------------------------------------------------------------------------------------------------------------------------------------------------------------------------|-----------------------------------------------------------------------------------------------------------------------------------------------------------------------------------------------------------------------------------------------------------------------------------------------------------------------------------------|-------------------------------------------------------------------------------------------------------------------------------------------------------------------------------------------------------------------------------------------------------------------------------------------------------------------------------------------------------------------------------------------------------------------------------------------------------------------------------------------------------------------------------------------------------------------------------------------------------------------------------------------------------------------------------------------------------------------------------------------------------------------------------------------------------------------------------------------------------------------------------------------------------------------------------------------------------------------------------------------------------------------------------------------------------------------------------------------------------------------------------------------------------------------------------------------------------------------------------------------------------------------------------------------------------------------------------------------------------------------------------------------------------------------------------------------------------------------------------------------------------------------------------------------------------------------------------------------------------------------------------------------------------------------------------------------------------------------------------------------------------------------------------------------------------------------------------------------------------------------------------------------------------------------------------------------------------------------------------------------------------------------------------------------------------------------------------------------------------------------------------------------------------------------------------------------------------------------------------------------------------------------------------------------------------------------------------------------------------------------------------------------------------------------------------------------------------------------------------------------------------------------------------------------------------------------------------------------------------------------------------------------------------------------------------------------------------------------------------------------------------------------------------------------------------------------------------|---------------------------------------------------------------------------------------------------------------------------------------------------------------------------------------------------------------------------------------------------------------------------------------------------------------------------------------------------------------------------------------------------------------------------------------------------------------------------------------------------------------------------------------------------------------------------------------------------------------------------------------------------------------------------------------------------------------------------------------------------------------------------------------------------------------------------------------------------------------------------------------------------------------------------------------------------------------|
|                                                                                                                                         |                                                                                                                                                                                                                                                                                                                                                                                                                                                                                     |                                                                                                                                                                                                                                                                                                                                         |                                                                                                                                                                                                                                                                                                                                                                                                                                                                                                                                                                                                                                                                                                                                                                                                                                                                                                                                                                                                                                                                                                                                                                                                                                                                                                                                                                                                                                                                                                                                                                                                                                                                                                                                                                                                                                                                                                                                                                                                                                                                                                                                                                                                                                                                                                                                                                                                                                                                                                                                                                                                                                                                                                                                                                                                                               |                                                                                                                                                                                                                                                                                                                                                                                                                                                                                                                                                                                                                                                                                                                                                                                                                                                                                                                                                               |
| <p><b>Authors:</b><br/>McHale et al. <sup>87</sup></p> <p><b>Year published:</b><br/>2020</p> <p><b>Country:</b><br/>United Kingdom</p> | <p><b>Number of participants:</b><br/>305 patients completed a questionnaire and 14 PCPs (12 GPs; 2 PNs) completed a questionnaire and participated in interviews</p> <p><b>Inclusion criteria:</b><br/>PCPs:<br/>• GPs and PNs in 7 participating practices<br/>Patients:<br/>• Consulted by one of the participating PCPs</p> <p><b>Exclusion criteria:</b><br/>None</p> <p><b>Setting and population:</b><br/>• 7 Primary Care Practices across 3 NHS Scotland health boards</p> | <p>Convergent mixed methods design using convenience sampling. Qualitative component used semi-structured interviews and thematic analysis.</p> <p><b>Aims:</b><br/>The study aimed to understand the beliefs that PCPs and patients with overweight and obesity have about obesity and primary care weight management in Scotland.</p> | <p><b>Theme 1:</b><br/>PCP role in patient weight management</p> <ul style="list-style-type: none"> <li>• GPs and PNs had differing views about the role of primary care in patient weight management</li> <li>• Addressing patient weight issues and awareness was GPs’ professional responsibility particularly when patients’ excessive weight was impacting on their health or when patients requested assistance with their weight</li> <li>• Some GPs did not believe it was their role to engage patients in preventative weight management or monitor their weight and did not perceive prevention and monitoring were an efficient use of their time</li> <li>• GPs perceived that standalone weight issues were the responsibility of the patient, not primary care</li> <li>• PN participants perceived direct weight management was part of their role and regularly engaged in weight management and monitoring with patients</li> </ul> <p><b>Theme 2:</b><br/>Discussing weight issues with patients</p> <ul style="list-style-type: none"> <li>• PCPs preferred to discuss weight issues within the context of patients’ existing health issues</li> <li>• PCPs expressed an apprehension to start a discussion about patient weight when they could not establish a clear link between existing health issues and the patient’s weight, or when patients did not recognise that their body weight was excessive and potentially problematic</li> <li>• PCPs perceived that weight was a personal issue, and discussing weight without a health-related reason, was inappropriate and may elicit a negative emotional reaction</li> </ul> <p><b>Theme 3:</b><br/>Barriers to weight management</p> <ul style="list-style-type: none"> <li>• The inefficacy of weight management interventions was a barrier</li> <li>• There was a lack of confidence in the evidence base for weight management interventions recommended by clinical guidelines</li> <li>• Systemic barriers to weight management included lack of consultation time, restrictive eligibility criteria for specialised weight management referrals and shortage of financial and human resources in primary care</li> <li>• Lack of referral pathways for overweight patients when weight was not impacting on their health</li> <li>• One PCP highlighted that current NHS working contracts did not prioritise or incentivise weight management</li> <li>• Several PCPs described patients with overweight and obesity as lacking the motivation to address weight issues, and that for many patients their weight was not a priority</li> <li>• PCPs acknowledged that training was always potentially useful; however, most were confident in their ability and were ambivalent about receiving additional weight management</li> </ul> | <p><b>Author’s conclusions:</b><br/>“Acknowledging a shared responsibility for patient weight could improve outcome for patients with overweight and obesity. There is a pressing need to review, standardise and clarify the primary care weight management process in NHS Scotland.”</p> <p><b>Reviewer’s comments:</b></p> <ul style="list-style-type: none"> <li>• This study revealed that PCPs acknowledged a responsibility for patient weight but they found it challenging to discuss weight related issues with patients</li> <li>• There were multiple barriers to weight management, both systemic and patient related</li> <li>• Some inconsistencies in terminology related to the design, which is a little confusing, i.e., authors refer to cross-sectional mixed methods; convergent mixed methods; concurrent triangulation mixed methods</li> </ul> <p>This study has clearly met 7/10 (70%) criteria in the critical appraisal tool.</p> |

1  
2  
3  
4  
5  
6  
7  
8  
9  
10  
11  
12  
13  
14  
15  
16  
17  
18  
19  
20  
21  
22  
23  
24  
25  
26  
27  
28  
29  
30  
31  
32  
33  
34  
35  
36  
37  
38  
39  
40  
41  
42  
43  
44  
45  
46

|  |  |  |                                                                                                            |  |
|--|--|--|------------------------------------------------------------------------------------------------------------|--|
|  |  |  | training. Lack of weight management effectiveness was due to patient factors, including lack of motivation |  |
|--|--|--|------------------------------------------------------------------------------------------------------------|--|

**Abbreviations:**  
 BMI: Body Mass Index; GP: General Practitioner; HCP: Health Care Professional/Practitioner; NP: Nurse Practitioner; PC: Primary Care; PCP: Primary Care Provider; PN: Practice Nurse; QoF: Quality and Outcomes Framework; WC: Waist Circumference; WCM: Waist Circumference Measurement.

For peer review only

Supplementary Table S5: Risk of bias assessment of studies reviewed

| Cohort                                  | 1. Were the two groups similar and recruited from the same population? | 2. Were the exposure measures measured similarly to assign people to both exposed and unexposed groups? | 3. Was the exposure measured in a valid and reliable way? | 4. Were confounding factors identified?                                     | 5. Were strategies to deal with confounding factors stated? | 6. Were the groups/participants free of the outcome at the start of the study (or at the moment of exposure)? | 7. Were the outcomes measured in a valid and reliable way? | 8. Was the follow up time reported and sufficient to be long enough for outcomes to occur? | 9. Was follow up complete, and if not, were the reasons to loss to follow up described and explored? | 10. Were strategies to address incomplete follow up utilized? | 11. Was appropriate statistical analysis used? | Overall Quality | Unclear | Proportion |
|-----------------------------------------|------------------------------------------------------------------------|---------------------------------------------------------------------------------------------------------|-----------------------------------------------------------|-----------------------------------------------------------------------------|-------------------------------------------------------------|---------------------------------------------------------------------------------------------------------------|------------------------------------------------------------|--------------------------------------------------------------------------------------------|------------------------------------------------------------------------------------------------------|---------------------------------------------------------------|------------------------------------------------|-----------------|---------|------------|
| Booth, Prevost & Gulliford (2013)       | Yes                                                                    | Yes                                                                                                     | Yes                                                       | Yes                                                                         | Yes                                                         | Not applicable                                                                                                | Yes                                                        | Yes                                                                                        | Yes                                                                                                  | No                                                            | Yes                                            | 9/10            | 0       | 90%        |
| Emanuel et al. (2016)                   | Yes                                                                    | Yes                                                                                                     | Yes                                                       | Yes                                                                         | Yes                                                         | Not applicable                                                                                                | Unclear                                                    | Yes                                                                                        | Not applicable                                                                                       | Not applicable                                                | Yes                                            | 7/8             | 1       | 88%        |
| Nicholson et al. (2019)                 | Yes                                                                    | Yes                                                                                                     | Unclear                                                   | Yes                                                                         | Yes                                                         | Not applicable                                                                                                | Unclear                                                    | Yes                                                                                        | Yes                                                                                                  | No                                                            | Yes                                            | 7/10            | 2       | 70%        |
| Osborn et al. (2011)                    | Yes                                                                    | Yes                                                                                                     | Yes                                                       | Yes                                                                         | Yes                                                         | Not applicable                                                                                                | Yes                                                        | Yes                                                                                        | Unclear                                                                                              | No                                                            | Yes                                            | 8/10            | 1       | 80%        |
| Cross-sectional                         | 1. Were the criteria for inclusion in the sample clearly defined?      | 2. Were the study subjects and the setting described in detail?                                         | 3. Was the exposure measured in a valid and reliable way? | 4. Were objective, standard criteria used for measurement of the condition? | 5. Were confounding factors identified?                     | 6. Were strategies to deal with confounding factors stated?                                                   | 7. Were the outcomes measured in a valid and reliable way? | 8. Was appropriate statistical analysis used?                                              |                                                                                                      |                                                               |                                                | Overall Quality | Unclear | Proportion |
| Aleem et al. (2015)                     | Yes                                                                    | Yes                                                                                                     | Yes                                                       | Yes                                                                         | No                                                          | No                                                                                                            | Yes                                                        | No                                                                                         |                                                                                                      |                                                               |                                                | 5/8             | 0       | 63%        |
| Baer et al. (2013)                      | Yes                                                                    | Yes                                                                                                     | Yes                                                       | Yes                                                                         | Yes                                                         | Yes                                                                                                           | Yes                                                        | Yes                                                                                        |                                                                                                      |                                                               |                                                | 8/8             | 0       | 100%       |
| Bleich, Pickett-Blakely & Cooper (2011) | Yes                                                                    | Yes                                                                                                     | Yes                                                       | Yes                                                                         | Yes                                                         | Yes                                                                                                           | Yes                                                        | Yes                                                                                        |                                                                                                      |                                                               |                                                | 8/8             | 0       | 100%       |
| Bramlage et al. (2014)                  | Yes                                                                    | Yes                                                                                                     | Yes                                                       | Yes                                                                         | Yes                                                         | Yes                                                                                                           | Yes                                                        | Unclear                                                                                    |                                                                                                      |                                                               |                                                | 7/8             | 1       | 88%        |

|                                |                                                                                                         |                                                                                                        |                                                                                                     |                                                                                                            |                                                                                                  |                                                                                     |                                                                                          |                                                                       |                                                                                                                                                           |                                                                                                                    |  |                        |                |                   |
|--------------------------------|---------------------------------------------------------------------------------------------------------|--------------------------------------------------------------------------------------------------------|-----------------------------------------------------------------------------------------------------|------------------------------------------------------------------------------------------------------------|--------------------------------------------------------------------------------------------------|-------------------------------------------------------------------------------------|------------------------------------------------------------------------------------------|-----------------------------------------------------------------------|-----------------------------------------------------------------------------------------------------------------------------------------------------------|--------------------------------------------------------------------------------------------------------------------|--|------------------------|----------------|-------------------|
| Cuccu, Abi-Aad & Duggal (2019) | Yes                                                                                                     | Yes                                                                                                    | Yes                                                                                                 | Yes                                                                                                        | Yes                                                                                              | Yes                                                                                 | Yes                                                                                      | Yes                                                                   |                                                                                                                                                           |                                                                                                                    |  | 8/8                    | 0              | 100%              |
| Cyr et al. (2016)              | Yes                                                                                                     | Yes                                                                                                    | Yes                                                                                                 | Yes                                                                                                        | Yes                                                                                              | Yes                                                                                 | Yes                                                                                      | Yes                                                                   |                                                                                                                                                           |                                                                                                                    |  | 8/8                    | 0              | 100%              |
| Dalton et al. (2011)           | Yes                                                                                                     | Yes                                                                                                    | Yes                                                                                                 | Yes                                                                                                        | Yes                                                                                              | Yes                                                                                 | Yes                                                                                      | Yes                                                                   |                                                                                                                                                           |                                                                                                                    |  | 8/8                    | 0              | 100%              |
| Ghosh (2016)                   | Yes                                                                                                     | Yes                                                                                                    | Yes                                                                                                 | Yes                                                                                                        | Yes                                                                                              | Yes                                                                                 | Yes                                                                                      | Yes                                                                   |                                                                                                                                                           |                                                                                                                    |  | 8/8                    | 0              | 100%              |
| Gonzalez-Chica et al. (2019)   | Yes                                                                                                     | Yes                                                                                                    | Yes                                                                                                 | Yes                                                                                                        | Yes                                                                                              | Yes                                                                                 | Yes                                                                                      | Yes                                                                   |                                                                                                                                                           |                                                                                                                    |  | 8/8                    | 0              | 100%              |
| Gutiérrez Angulo et al. (2014) | Yes                                                                                                     | Unclear                                                                                                | Yes                                                                                                 | Yes                                                                                                        | No                                                                                               | No                                                                                  | Yes                                                                                      | No                                                                    |                                                                                                                                                           |                                                                                                                    |  | 4/8                    | 1              | 50%               |
| Mattar et al. (2017)           | Yes                                                                                                     | Yes                                                                                                    | Yes                                                                                                 | Yes                                                                                                        | Yes                                                                                              | Yes                                                                                 | Yes                                                                                      | Yes                                                                   |                                                                                                                                                           |                                                                                                                    |  | 8/8                    | 0              | 100%              |
| Melamed et al. (2009)          | Yes                                                                                                     | Yes                                                                                                    | Yes                                                                                                 | Yes                                                                                                        | Yes                                                                                              | Yes                                                                                 | Yes                                                                                      | Yes                                                                   |                                                                                                                                                           |                                                                                                                    |  | 8/8                    | 0              | 100%              |
| Mocarski et al. (2018)         | Yes                                                                                                     | Yes                                                                                                    | Yes                                                                                                 | Yes                                                                                                        | Yes                                                                                              | Yes                                                                                 | Yes                                                                                      | Yes                                                                   |                                                                                                                                                           |                                                                                                                    |  | 8/8                    | 0              | 100%              |
| Rose et al. (2009)             | Yes                                                                                                     | Yes                                                                                                    | Yes                                                                                                 | Yes                                                                                                        | No                                                                                               | No                                                                                  | Yes                                                                                      | No                                                                    |                                                                                                                                                           |                                                                                                                    |  | 5/8                    | 0              | 63%               |
| Ruser et al. (2005)            | Yes                                                                                                     | Yes                                                                                                    | Yes                                                                                                 | Yes                                                                                                        | Unclear                                                                                          | Yes                                                                                 | Yes                                                                                      | Unclear                                                               |                                                                                                                                                           |                                                                                                                    |  | 6/8                    | 2              | 75%               |
| Turner, Harris & Mazza (2015)  | Yes                                                                                                     | Yes                                                                                                    | Yes                                                                                                 | Yes                                                                                                        | Yes                                                                                              | Yes                                                                                 | Yes                                                                                      | Yes                                                                   |                                                                                                                                                           |                                                                                                                    |  | 8/8                    | 0              | 100%              |
| Verberne et al. (2018)         | Yes                                                                                                     | Yes                                                                                                    | Yes                                                                                                 | Yes                                                                                                        | Yes                                                                                              | Yes                                                                                 | Yes                                                                                      | Yes                                                                   |                                                                                                                                                           |                                                                                                                    |  | 8/8                    | 0              | 100%              |
| Yoong et al. (2014)            | Yes                                                                                                     | Yes                                                                                                    | Yes                                                                                                 | Yes                                                                                                        | Yes                                                                                              | Yes                                                                                 | Unclear                                                                                  | Yes                                                                   |                                                                                                                                                           |                                                                                                                    |  | 7/8                    | 1              | 88%               |
| <b>Qualitative research</b>    | <b>1. Is there congruity between the stated philosophical perspective and the research methodology?</b> | <b>2. Is there congruity between the research methodology and the research question or objectives?</b> | <b>3. Is there congruity between the research methodology and the methods used to collect data?</b> | <b>4. Is there congruity between the research methodology and the representation and analysis of data?</b> | <b>5. Is there congruity between the research methodology and the interpretation of results?</b> | <b>6. Is there a statement locating the researcher culturally or theoretically?</b> | <b>7. Is the influence of the researcher on the research, and vice-versa, addressed?</b> | <b>8. Are participants, and their voices, adequately represented?</b> | <b>9. Is the research ethical according to current criteria or, for recent studies, and is there evidence of ethical approval by an appropriate body?</b> | <b>10. Do the conclusions drawn in the research report flow from the analysis, or interpretation, of the data?</b> |  | <b>Overall Quality</b> | <b>Unclear</b> | <b>Proportion</b> |
| Dunkley et al. (2009)          | No                                                                                                      | Yes                                                                                                    | Yes                                                                                                 | Yes                                                                                                        | Yes                                                                                              | No                                                                                  | No                                                                                       | Yes                                                                   | Yes                                                                                                                                                       | Yes                                                                                                                |  | 7/10                   | 0              | 70%               |
| Gaynor et al (2018)            | Yes                                                                                                     | Yes                                                                                                    | Yes                                                                                                 | Yes                                                                                                        | Yes                                                                                              | Yes                                                                                 | No                                                                                       | No                                                                    | Yes                                                                                                                                                       | Yes                                                                                                                |  | 8/10                   | 0              | 80%               |

1  
2  
3  
4  
5  
6  
7  
8  
9  
10  
11  
12  
13  
14  
15  
16  
17  
18  
19  
20  
21  
22  
23  
24  
25  
26  
27  
28  
29  
30  
31  
32  
33  
34  
35  
36  
37  
38  
39  
40  
41  
42  
43  
44  
45  
46

|                     |    |     |     |     |     |    |    |     |     |     |  |      |   |     |
|---------------------|----|-----|-----|-----|-----|----|----|-----|-----|-----|--|------|---|-----|
| McHale et al (2020) | No | Yes | Yes | Yes | Yes | No | No | Yes | Yes | Yes |  | 7/10 | 0 | 70% |
|---------------------|----|-----|-----|-----|-----|----|----|-----|-----|-----|--|------|---|-----|

For peer review only

## Supplementary Section S6: Summary of results from all meta-analyses

### S6.1 Sex as a predictor of BMI assessment

There is statistically significant evidence that BMI assessment is more common in females than in males overall, as well as specific to UK and USA (Table S6.1). As expected, odds ratios are larger than risk ratios. The association is stronger in the higher quality and larger studies. The very high heterogeneity between studies is not relieved by any of the sub-group variable nor by excluding studies with a lower quality rating.

Table S6.1 Summary statistics from the meta-analyses of females relative to males, including sub-group and sensitivity analyses

|                            | Reference category | No. of studies | Pooled risk ratio | I <sup>2</sup> , heterogeneity test p-value |
|----------------------------|--------------------|----------------|-------------------|---------------------------------------------|
| Sex                        | Male               | 15             | 1.28 (1.10,1.50)  | 99.8%, p<0.001                              |
| Subgroup by outcome        |                    |                |                   |                                             |
| - BMI assessment           | Male               | 8              | 1.27 (1.02,1.58)  | 99.9%, p<0.001                              |
| - BMI diagnosis assessment | Male               | 6              | 1.34 (0.87,2.05)  | 95.0%, p<0.001                              |
| Subgroup by ratio measure  |                    |                |                   |                                             |
| - odds ratio               | Male               | 11             | 1.45 (1.21,1.74)  | 99.5%, p<0.001                              |
| - risk ratio               | Male               | 4              | 1.18 (1.04,1.35)  | 99.7%, p<0.001                              |
| Subgroup by country        |                    |                |                   |                                             |
| - Australia                | Male               | 3              | 0.99 (0.79,1.25)  | 87.2%, p<0.001                              |
| - UK                       | Male               | 3              | 1.27 (1.02,1.60)  | 100%, p<0.001                               |
| - USA                      | Male               | 6              | 1.33 (1.20,1.48)  | 97.0%, p<0.001                              |
| - Other                    | Male               | 3              | 1.32 (0.81,2.16)  | 91.2%, p<0.001                              |
| Sensitivity by quality     |                    |                |                   |                                             |
| - High quality             | Male               | 10             | 1.45 (1.21,1.74)  | 99.6%, p<0.001                              |

The Funnel plot (Figure S6.1) and Egger's test (p=0.905) reveal no statistically significant evidence of reporting bias.

Figure S6.1 Funnel plot of sex as a predictor of BMI assessment

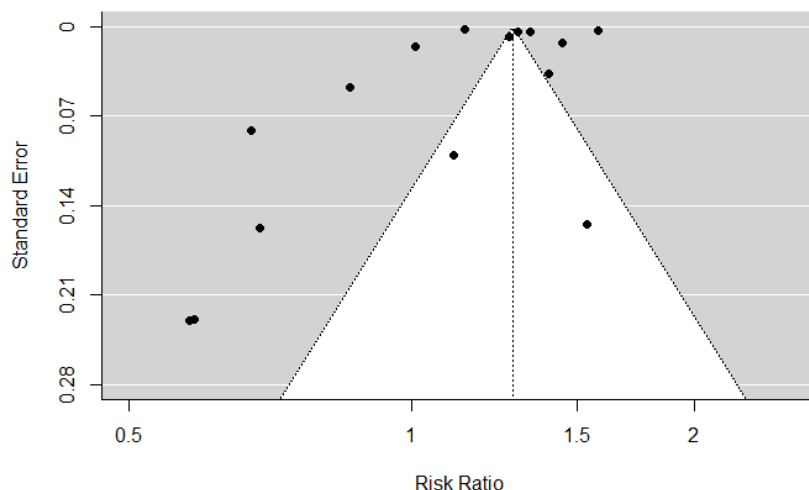

### S6.2 Age as a predictor of BMI assessment

Age categories varied between studies. For meta-analysis the rate of BMI assessment in the age group closest to or including 65 years relative to the age group closest to or including 30 age group are identified and pooled. The actual results pooled were the BMI assessment for 65 or more years relative to 18-29 years,<sup>65 84</sup> 65 or more years relative to 18-39 years,<sup>69</sup> 65-74 years relative to 18-24 years,<sup>66 68</sup> 65-74 years relative to 18-44 years,<sup>72</sup> 60-69 years relative to 18-29 years,<sup>64 78</sup> 61-67 years relative to 31-40 years,<sup>83</sup> 60 or more years relative to 30-44 years,<sup>67</sup> 56-74 years relative to 19-44 years,<sup>82</sup> and 55 or more years relative to less than 55 years.<sup>76</sup>

One study<sup>75</sup> presented results for age as a continuous variable and another<sup>70</sup> presented results for sex by age categories. Neither could not be included in the meta-analysis.

There is no statistically significant evidence that the rate of BMI assessment differs between the older and younger age groups (Table S6.2). The only statistically significant result occurs in the 'other countries' category in which a study from Israel<sup>76</sup> is combined with a study from Germany,<sup>67</sup> both of which recorded a statistically significant increased rate of BMI assessment in the older age group. The Funnel plot (Figure S6.2) and Egger's test ( $p=0.348$ ) reveal no evidence of reporting bias.

There is very high heterogeneity between studies. This is not alleviated by any of the grouping variables or by the exclusion of studies with a lower quality rating.

Table S6.2 Summary statistics from the meta-analyses of oldest age group relative to youngest, including sub-group and sensitivity analyses

|                          | Reference category  | No. of studies | Pooled ratio     | I <sup>2</sup> , heterogeneity test p-value |
|--------------------------|---------------------|----------------|------------------|---------------------------------------------|
| Age                      | Closest to 30 years | 12             | 0.90 (0.50,1.63) | 100%, p<0.001                               |
| Subgroup by outcome      |                     |                |                  |                                             |
| - recorded BMI           | Closest to 30 years | 8              | 1.21 (0.82,1.78) | 99.8%, p<0.001                              |
| - recorded BMI diagnosis | Closest to 30 years | 4              | 0.52 (0.25,1.05) | 83.3%, p<0.001                              |
| Subgroup by country      |                     |                |                  |                                             |
| - Australia              | Closest to 30 years | 3              | 1.11 (0.98,1.26) | 83.6%, p=0.002                              |
| - UK                     | Closest to 30 years | 3              | 1.22 (0.78,1.90) | 99.9%, p<0.001                              |
| - USA                    | Closest to 30 years | 4              | 0.53 (0.24,1.17) | 99.4%, p<0.001                              |
| - Other                  | Closest to 30 years | 2              | 2.61 (1.73,3.95) | 0%, p=0.836                                 |
| Sensitivity by quality   |                     |                |                  |                                             |
| - High quality           | Closest to 30 years | 9              | 0.69 (0.19,2.48) | 100%, p<0.001                               |



The funnel plot shown in Figure S6.2 confirms high heterogeneity (many studies outside the central funnel) but provides no evidence of publication bias. Egger's test also returned no statistically significant evidence of small study bias ( $p=0.348$ ).

Figure S6.2 Funnel plot of age group as a predictor of BMI assessment

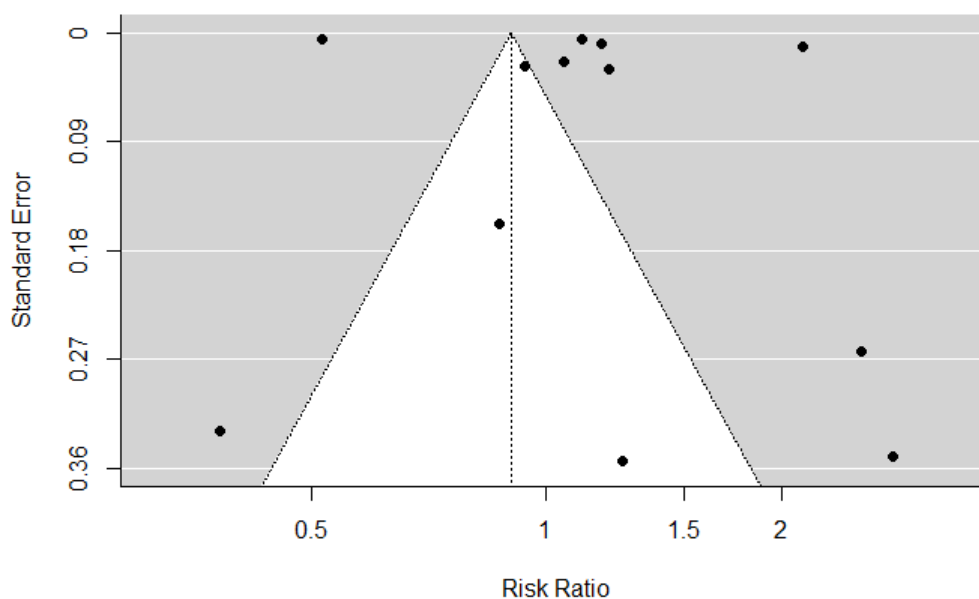

### S6.3 Race/ethnicity as a predictor of BMI assessment

Results were provided by race/ethnicity group in nine studies, but the classification used varied considerable between studies and countries. For example, one study from the UK classified ethnic groups as White, Indian, Bangladeshi, Pakistani, Chinese, Other Asian, Black African, Black Caribbean, Other Black, Other, Mixed Race or Unknown<sup>78</sup> while a US study used a very different classification of White, Asian, Black, Hispanic, Native American, Multi-race, and Other.<sup>77</sup>

In the meta-analysis the race/ethnicity categories 'White' and 'Caucasian' were regarded as equivalent. The reference category was 'White' or 'Caucasian'<sup>84</sup> for eight of the nine studies. Three of these<sup>69 80 84</sup> defined a single comparator group 'Other' or 'non-Caucasian'. Five had multiple comparator race/ethnicity categories which we combined into a single 'Non-White'

category using the method in another.<sup>88</sup> One study<sup>75</sup> defined 'Black' as the reference category. We inverted the results for 'White' compared to 'Black' but as the remaining categories 'Hispanic' or 'Other' were only compared to 'Black' we could not include them in the 'White' against 'Non-White' meta-analysis.

Meta-analyses revealed statistically significant evidence that BMI assessment is more common in people of non-White race than in White race overall, particularly when BMI is recorded as a diagnosis (Table S6.3). The effect size may be marginally stronger in the higher quality studies, though the smaller sample size leads to wider confidence intervals. There are very high levels of heterogeneity between the studies, and this is not alleviated by sub-groups or exclusion of studies with lower quality scores.

Table S6.3 Summary statistics from the meta-analyses of non-White relative to White race, including sub-group and sensitivity analyses

|                            | Reference category | No. of studies | Pooled risk ratio | I <sup>2</sup> , heterogeneity test p-value |
|----------------------------|--------------------|----------------|-------------------|---------------------------------------------|
| Race                       | White              | 9              | 1.27 (1.03,1.57)  | 99.6%, p<0.001                              |
| Subgroup by outcome        |                    |                |                   |                                             |
| - BMI assessment           | White              | 4              | 1.10 (0.97,1.25)  | 99.1%, p<0.001                              |
| - BMI diagnosis assessment | White              | 5              | 1.43 (0.78,2.61)  | 82.2%, p<0.001                              |
| Sensitivity by quality     |                    |                |                   |                                             |
| - High quality             | White              | 6              | 1.36 (0.86,2.16)  | 99.5%, p<0.001                              |

The Funnel plot (Figure S6.3) suggests a tendency for smaller studies to find that non-Whites have lower rates of BMI assessment than Whites. As there are less than 10 studies, Egger's test at p=0.083 may be underpowered.

Figure S6.3 Funnel plot of race as a predictor of BMI assessment

1  
2  
3  
4  
5  
6  
7  
8  
9  
10  
11  
12  
13  
14  
15  
16  
17  
18  
19  
20  
21  
22  
23  
24  
25  
26  
27  
28  
29  
30  
31  
32  
33  
34  
35  
36  
37  
38  
39  
40  
41  
42  
43  
44  
45  
46  
47  
48  
49  
50  
51  
52  
53  
54  
55  
56  
57  
58  
59  
60

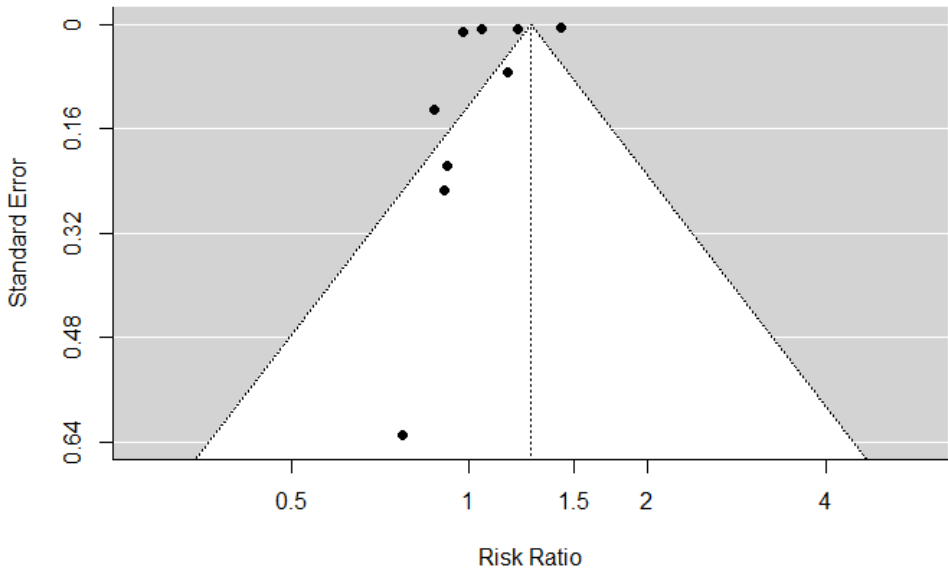

peer review only

### S6.4 Deprivation as a predictor of BMI assessment

All four studies reporting relative rates of BMI assessment across socio-economic groups were from the UK.<sup>68 70 71</sup> All used postcode-based Indexes of Multiple Deprivation, although version differed.

The pooled results (Table S6.4) provide statistically significant evidence that BMI assessment was more likely among those with most compared with least deprivation, although heterogeneity was high. Given the small number of studies, sub-group and sensitivity analyses are not pursued.

Table S6.4 Summary statistics from the meta-analysis of greatest deprivation relative to least

|                   | Reference category | No. of studies | Pooled risk ratio | I <sup>2</sup> , heterogeneity test p-value |
|-------------------|--------------------|----------------|-------------------|---------------------------------------------|
| Deprivation index | Least              | 4              | 1.21 (1.18,1.24)  | 73.9%, p=0.009                              |

### S6.5 Health insurance status as a predictor of BMI assessment

Five of the 6 studies reporting insurance status as a predictor of BMI assessment used 'private' insurance as the reference category. The remaining study<sup>75</sup> could not be included in the meta-analysis as the reference category was unclear, but was not 'private'. Two studies compared 'Private' to 'Not private'.<sup>65 84</sup> The remaining three studies<sup>63 64 69</sup> had multiple comparator categories ('Medicare', 'Medicaid', 'Other', 'Self-Pay/None') which we combined into a single 'Not private' category using the method in another study.<sup>88</sup>

The pooled results (Table S6.5) provide no evidence of association between health insurance status and BMI assessment.

Table S6.5 Summary statistics from the meta-analysis of non-private against private health insurance

|                  | Reference category | No. of studies | Pooled risk ratio | I <sup>2</sup> , heterogeneity test p-value |
|------------------|--------------------|----------------|-------------------|---------------------------------------------|
| Insurance status | Private            | 5              | 1.01 (0.83,1.23)  | 95.3%, p<0.001                              |

### S6.6 BMI category as a predictor of BMI assessment

The different studies compared BMI assessment rates across varying BMI-based weight categories. The meta-analysis pools the comparisons of the heaviest available weight group to the lightest available group. These comparison groups were 'BMI 40+' relative to 'BMI 25-29.9',<sup>66 69</sup> 'BMI 40+' relative to 'BMI 30-34.9',<sup>65</sup> 'BMI 40+' relative to 'BMI <40',<sup>75</sup> 'BMI 35+' relative to 'BMI 18.5-24.99',<sup>78</sup> 'BMI 30+' relative to 'BMI <30',<sup>76</sup> and 'BMI 30+' relative to 'BMI 25-29.9'.<sup>81 83</sup>

The results of the meta-analyses are presented in Table S6.6. There is very high heterogeneity between the studies. The overall pooled risk ratio is suggestive of an increased rate of BMI assessment among heavier patients, but statistical significance is not reached. The differences between higher and lower weight categories appear to be greater when BMI is being recorded as a diagnosis and when analyses are restricted to studies with the highest quality rating score. However, high heterogeneity and correspondingly wide confidence intervals negate definitive interpretations.

Table S6.6 Summary statistics from the meta-analyses of those in the highest BMI category relative to those in the lowest, including sub-group and sensitivity analyses

|                            | Reference category | No. of studies | Pooled risk ratio | I <sup>2</sup> , heterogeneity test p-value |
|----------------------------|--------------------|----------------|-------------------|---------------------------------------------|
| BMI category               | Lowest             | 8              | 1.55 (0.99,2.45)  | 99.6%, p<0.001                              |
| Subgroup by outcome        |                    |                |                   |                                             |
| - BMI assessment           | Lowest             | 4              | 1.55 (1.06,2.26)  | 99.8%, p<0.001                              |
| - BMI diagnosis assessment | Lowest             | 4              | 3.53 (0.30,40.9)  | 99.3%, p<0.001                              |
| Sensitivity by quality     |                    |                |                   |                                             |
| - High quality             | Lowest             | 4              | 2.56 (0.45,14.6)  | 99.3%, p<0.001                              |

1  
2  
3  
4  
5 The funnel plot, Figure S6.6, again shows that some of the smaller studies reported relatively  
6 high risk ratios for BMI assessment in the heavier group. However, this pattern is not  
7 completely consistent, and the small number of studies precludes formal hypothesis testing for  
8 bias.  
9  
10  
11  
12 bias.

13  
14  
15 Figure S6.6 Funnel plot of BMI category as a predictor of BMI assessment

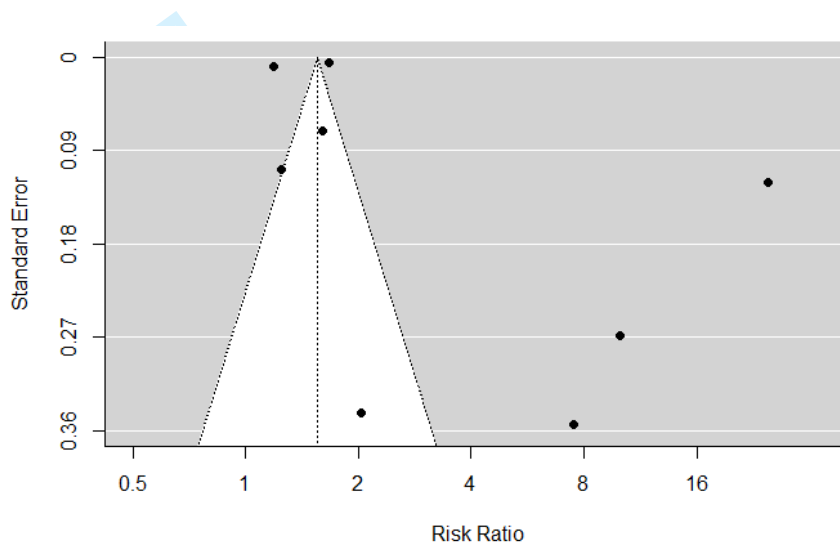

### S6.7 Smoking status as a predictor of BMI assessment

Only three studies reported the relative rate of BMI assessment by smoking status.<sup>66 78 83</sup> The meta-analysis report results of current smokers relative to never smokers. There was high heterogeneity between the three studies and no evidence of association between smoking status and BMI assessment (Table S6.7). Given the small number of studies, sub-group and sensitivity analyses were not pursued.

Table S6.7 Summary statistics from the meta-analysis of greatest deprivation relative to least

|                | Reference category | No. of studies | Pooled risk ratio | I <sup>2</sup> , heterogeneity test p-value |
|----------------|--------------------|----------------|-------------------|---------------------------------------------|
| Smoking status | Non smoker         | 3              | 1.01 (0.90,1.14)  | 98.3%, p<0.001                              |

### S6.8 The number of comorbidities as a predictor of BMI assessment

In this meta-analysis we have equated the terms ‘Obesity-related comorbidities’,<sup>64</sup> ‘Comorbid conditions’,<sup>67</sup> ‘Multimorbidity’,<sup>68</sup> ‘Disease counts’,<sup>72</sup> ‘Chronic condition’,<sup>83</sup> ‘Charlson comorbidity index’,<sup>77</sup> and ‘Number of diagnoses recorded’,<sup>82</sup> to ‘Comorbidities’. The comparison of the relative frequency of BMI assessment comparing the highest comorbidity class with the lowest are pooled in the meta-analysis. The actual comparisons pooled are 5+ relative to 0,<sup>67 78</sup> 3+ relative to 0,<sup>64 72 82</sup> 2+ relative to 0-1,<sup>68</sup> at least one comorbidity present relative to absent,<sup>74 83</sup> Charlson comorbidity index of 5+ relative to 0,<sup>77</sup> and ‘very high’ relative to ‘lower’<sup>65</sup> based on the presence of absence of specific diagnosis codes.

One study<sup>75</sup> analysed the number of comorbidities as a numeric variable and could not be included in the current meta-analysis.



The meta-analysis provides statistically significant evidence that BMI assessment is more common in those in the highest number of comorbidities category, as compared to those in the low comorbidity category (Table S6.8). This effect can be seen in all subgroups and the association is slightly stronger in the higher quality studies (Table S6.8). The clinical magnitude of this association cannot be resolved due to the very high levels of heterogeneity overall and within each sub-group. The Funnel plot (Figure S6.8) and Egger's test ( $p=0.932$ ) reveal no consistent evidence of reporting bias.

Table S6.8 Summary statistics from the meta-analyses of most comorbidities relative to least, including sub-group and sensitivity analyses

|                            | Reference category | No. of studies | Pooled risk ratio | I <sup>2</sup> , heterogeneity test p-value |
|----------------------------|--------------------|----------------|-------------------|---------------------------------------------|
| Number of comorbidities    | Fewest             | 10             | 2.11 (1.60,2.79)  | 99.6%, $p<0.001$                            |
| Subgroup by outcome        |                    |                |                   |                                             |
| - BMI assessment           | Fewest             | 7              | 2.16 (1.58,2.96)  | 99.6%, $p<0.001$                            |
| - BMI diagnosis assessment | Fewest             | 3              | 1.75 (0.33,9.20)  | 98.8%, $p<0.001$                            |
| Subgroup by country        |                    |                |                   |                                             |
| - Australia                | Fewest             | 2              | 1.98 (0.51,7.63)  | 99.5%, $p<0.001$                            |
| - UK                       | Fewest             | 2              | 2.19 (1.56,3.07)  | 99.9%, $p<0.001$                            |
| - USA                      | Fewest             | 3              | 1.72 (1.68,1.75)  | 0%, $p=0.783$                               |
| - Other                    | Fewest             | 3              | 4.09 (2.18,7.66)  | 94.1%, $p<0.001$                            |
| Sensitivity by quality     |                    |                |                   |                                             |
| - High quality             | Fewest             | 7              | 2.30 (1.53,3.45)  | 99.5%, $p<0.001$                            |

Figure S6.8 Funnel plot of number of comorbidities as a predictor of BMI assessment

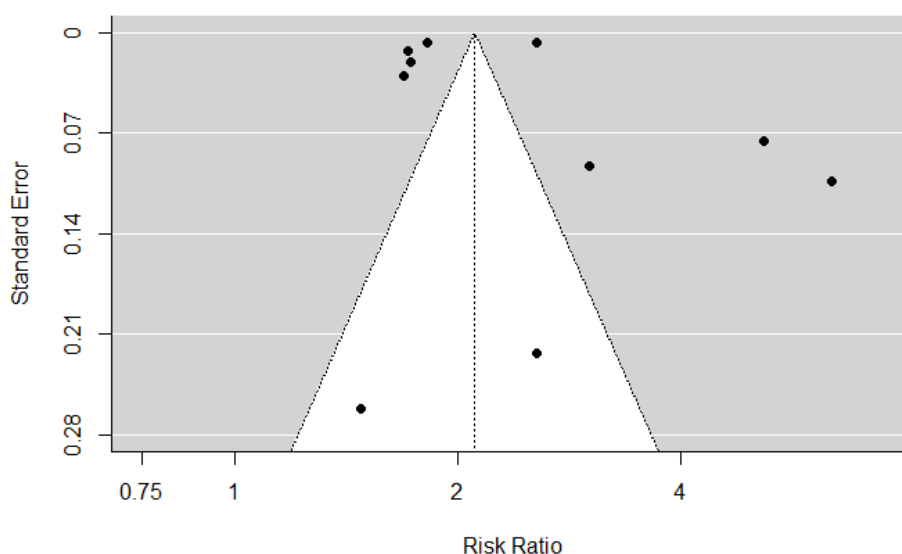

S6.9 Cardiovascular disease as a predictor of BMI assessment

This meta-analysis has combined the terms ‘Diagnosis with vascular complications’<sup>67</sup> and ‘Presence of heart disease’<sup>84</sup> with ‘Cardio-vascular disease’. All studies reported the assessment of BMI in the cardiovascular disease group relative to those without cardiovascular disease.

The pooled risk ratios from the meta-analyses and associated 95% confidence intervals summarised in Table S6.9 do not provide any statistically significant evidence of association between the presence of cardiovascular disease and the assessment of BMI.

Table S6.9 Summary statistics from the meta-analyses of those with cardio-vascular disease relative to those without, including sub-group and sensitivity analyses

|                            | Reference category | No. of studies | Pooled risk ratio | I <sup>2</sup> , heterogeneity test p-value |
|----------------------------|--------------------|----------------|-------------------|---------------------------------------------|
| Cardiovascular disease     | No                 | 7              | 0.94 (0.81,1.10)  | 98.0%, p<0.001                              |
| Subgroup by outcome        |                    |                |                   |                                             |
| - BMI assessment           | No                 | 4              | 0.99 (0.78,1.24)  | 95.3%, p<0.001                              |
| - BMI diagnosis assessment | No                 | 3              | 0.93 (0.31,2.80)  | 98.9%, p<0.001                              |

|                                          |    |   |                  |                |
|------------------------------------------|----|---|------------------|----------------|
| Sensitivity by quality<br>- High quality | No | 4 | 0.93 (0.71,1.23) | 96.4%, p<0.001 |
|------------------------------------------|----|---|------------------|----------------|

The funnel plot presented in Figure S6.9 shows high outliers to the right of most studies but as the number of studies is less than 10, we have not proceeded with testing for publication bias.

Figure S6.9 Funnel plot of cardiovascular disease as a predictor of BMI assessment

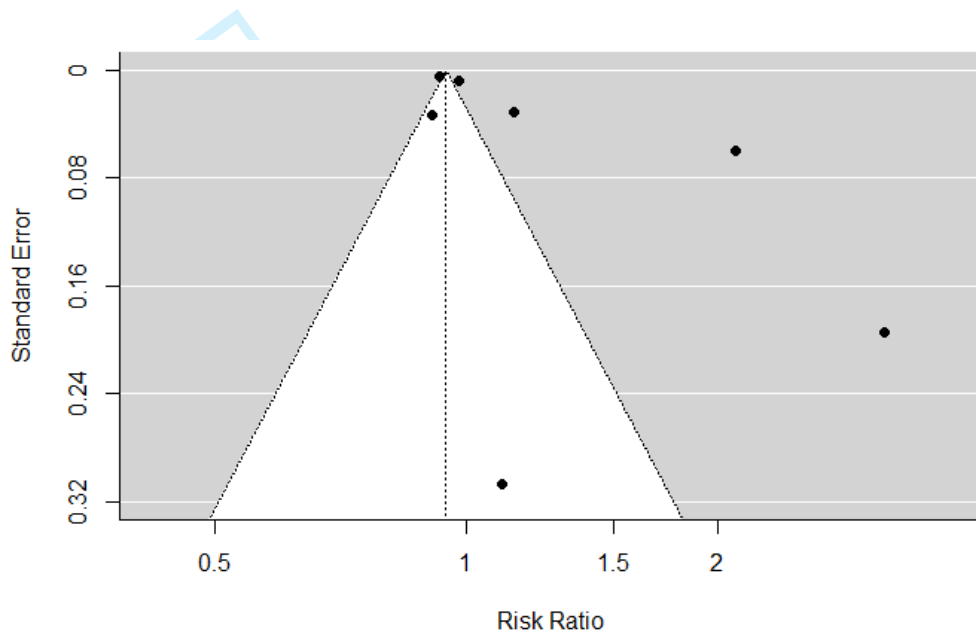

view only

### S6.10 Diabetes as a predictor of BMI assessment

The assessment of BMI among those with a diagnosis of diabetes was compared to the assessment of BMI among those without in 9 studies. The meta-analysis results are summarised in Table S6.10. Overall, there is insufficient evidence to conclude the BMI assessment differs between those with and those without diabetes, with the very high heterogeneity between the studies contributing uncertainty. However, subgroup analyses suggest a statistically significant increase in BMI assessment for Australian patients with diabetes, consistent across all 3 studies ( $I^2=0\%$ ) and statistically significant increase in BMI assessment in the 4 studies where BMI was recorded as a diagnosis, also with low heterogeneity ( $I^2=30.8\%$ ).

Table S6.10 Summary statistics from the meta-analyses of those with diabetes relative to those without, including sub-group and sensitivity analyses

|                            | Reference category | No. of studies | Pooled risk ratio | $I^2$ , heterogeneity test p-value |
|----------------------------|--------------------|----------------|-------------------|------------------------------------|
| Diabetes                   | No                 | 9              | 1.19 (0.93,1.52)  | 99.0%, $p<0.001$                   |
| Subgroup by outcome        |                    |                |                   |                                    |
| - BMI assessment           | No                 | 5              | 1.10 (0.48,2.52)  | 99.4%, $p<0.001$                   |
| - BMI diagnosis assessment | No                 | 4              | 1.24 (1.04,1.48)  | 30.8%, $p=0.227$                   |
| Subgroup by country        |                    |                |                   |                                    |
| - Australia                | No                 | 3              | 1.84 (1.75,1.93)  | 0%, $p=0.841$                      |
| - USA                      | No                 | 4              | 1.17 (0.99,1.40)  | 99.2%, $p<0.001$                   |
| - Other                    | No                 | 2              | 8.63 (3.42,21.8)  | 79.4%, $p=0.028$                   |
| Sensitivity by quality     |                    |                |                   |                                    |
| - High quality             | No                 | 7              | 1.26 (0.66,2.41)  | 98.4% ( $p<0.001$ )                |

The funnel plot (Figure S6.10) shows most of the smaller studies falling to the right of the expected range. Egger's test returns a highly statistically significant result ( $p=0.004$ ) but, given there are less than 10 studies, some care is warranted in the interpretation of this result.

Figure S6.10 Funnel plot of diabetes as a predictor of BMI assessment

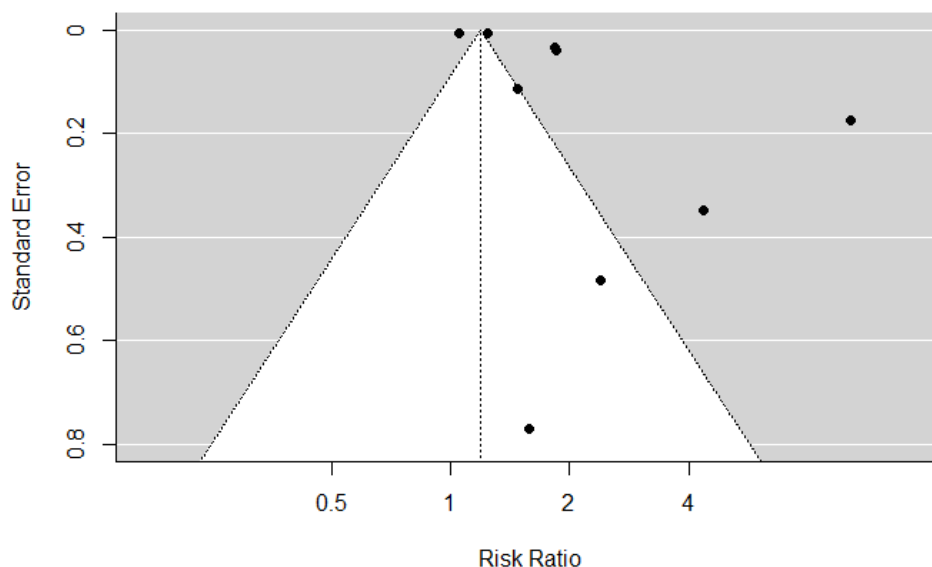

### S6.11 Dyslipidaemia disease as a predictor of BMI assessment

For the meta-analysis the presence of 'Hyperlipidaemia'<sup>69 72 82</sup> and 'Presence of cholesterol'<sup>84</sup> were combined with 'Dyslipidaemia'.<sup>77</sup> The overall meta-analysis (Table S6.11) provides insufficient evidence to conclude the BMI assessment differs between those with and those without dyslipidaemia, with the very high heterogeneity between the studies. However, subgroup analyses suggest a statistically significant increase in BMI assessment for Australian patients with dyslipidaemia and where BMI was recorded as a diagnosis. There is still considerable heterogeneity between studies even within these sub-groups ( $I^2=80.6\%$  and  $I^2=50.9\%$  respectively) also with low heterogeneity ( $I^2=30.8\%$ ). Restricting analyses to studies with the highest quality ranking produced statistically significant evidence of effect and decreased heterogeneity between the remaining studies ( $I^2=57.3\%$ ).

S6.11 Summary statistics from the meta-analyses of those with dyslipidaemia relative to those without, including sub-group and sensitivity analyses

|                            | Reference category | No. of studies | Pooled risk ratio | $I^2$ , heterogeneity test p-value |
|----------------------------|--------------------|----------------|-------------------|------------------------------------|
| Dyslipidaemia              | No                 | 6              | 1.12 (0.92,1.37)  | 99.5%, p<0.001                     |
| Subgroup by outcome        |                    |                |                   |                                    |
| - BMI assessment           | No                 | 3              | 0.99 (0.76,1.30)  | 98.2%, p<0.001                     |
| - BMI diagnosis assessment | No                 | 3              | 1.21 (1.03,1.42)  | 50.9%, p=0.131                     |
| Subgroup by country        |                    |                |                   |                                    |

|                        |    |   |                  |                |
|------------------------|----|---|------------------|----------------|
| - Australia            | No | 3 | 1.21 (1.08,1.36) | 80.6% p=0.059  |
| - USA                  | No | 3 | 1.12 (0.90,1.39) | 99.8%, p<0.001 |
| Sensitivity by quality |    |   |                  |                |
| - High quality         | No | 4 | 1.21 (1.15,1.28) | 57.3%, p=0.071 |

The funnel plot (Figure S6.11) shows most studies are equivalent size with the two smaller studies both reporting an increase in BMI assessment among people with dyslipidaemia. There are insufficient studies to allow statistical testing of this association.

Figure S6.11 Funnel plot of dyslipidaemia as a predictor of BMI assessment

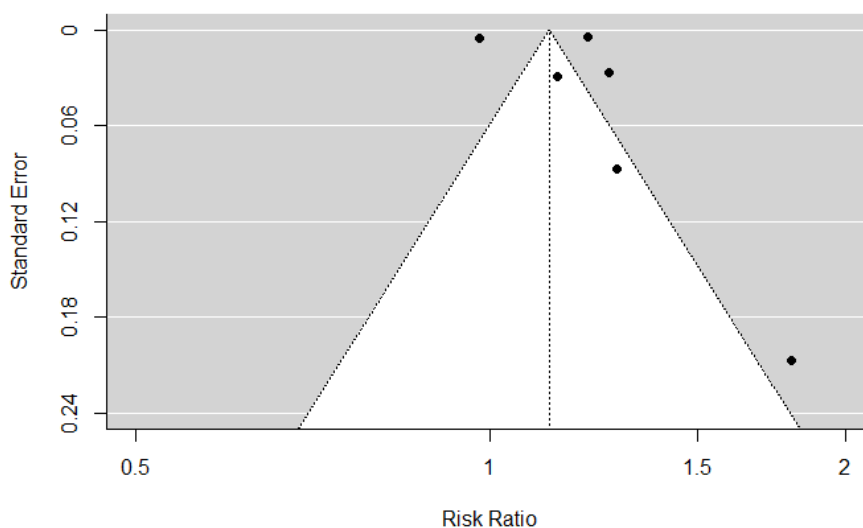

### S6.12 Hypertension as a predictor of BMI assessment

For this meta-analysis 'Presence of high blood pressure'<sup>84</sup> was regarded as equivalent to 'Hypertension' and 'Hypertensive'. The pattern of results is like those from the previous chronic comorbidities meta-analyses. The overall meta-analysis (Table S6.12) suffered very high heterogeneity and fell short of statistical significance. However, subgroup analyses partially alleviated the heterogeneity and suggested a statistically significant increase in BMI assessment both for Australian patients with hypertension and where BMI was recorded as a diagnosis. Restricting analyses to studies with the highest quality rating allowed a statistically significant result but failed to address the heterogeneity between studies.

Figure S6.12 Summary statistics from the meta-analyses of those with hypertension relative to those without, including sub-group and sensitivity analyses

|                            | Reference category | No. of studies | Pooled risk ratio | I <sup>2</sup> , heterogeneity test p-value |
|----------------------------|--------------------|----------------|-------------------|---------------------------------------------|
| Hypertension               | No                 | 10             | 1.17 (0.98,1.40)  | 99.5%, p<0.001                              |
| Subgroup by outcome        |                    |                |                   |                                             |
| - BMI assessment           | No                 | 6              | 1.11 (0.83,1.48)  | 99.7%, p<0.001                              |
| - BMI diagnosis assessment | No                 | 4              | 1.24 (1.20,1.28)  | 2.2%, p=0.382                               |
| Subgroup by country        |                    |                |                   |                                             |
| - Australia                | No                 | 3              | 1.15 (1.05,1.26)  | 69.4%, p=0.038                              |
| - UK                       | No                 | 2              | 1.33 (0.39,4.54)  | 99.4%, p<0.001                              |
| - USA                      | No                 | 4              | 1.14 (0.91,1.43)  | 99.8%, p<0.001                              |
| - Other                    | No                 | 1              | 3.20 (1.71,5.99)  | n.a.                                        |
| Sensitivity by quality     |                    |                |                   |                                             |
| - High quality             | No                 | 8              | 1.26 (1.10,1.43)  | 97.7%, p<0.001                              |

The funnel plot, Figure S6.12, again shows that some of the smaller studies report relatively high risk ratios for BMI assessment in the hypertensive group. However, there are exceptions and Egger's test returned no statistically significant evidence of bias (p=0.293).

Figure S6.12 Funnel plot of hypertension as a predictor of BMI assessment

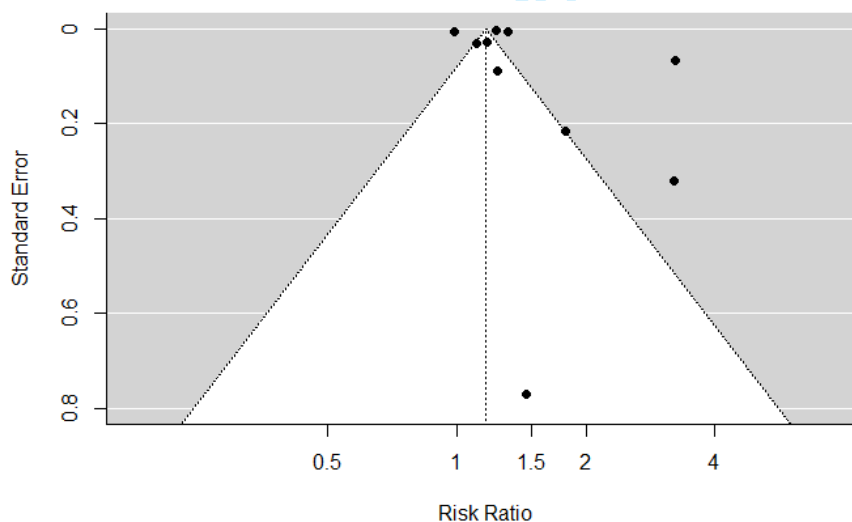

### S6.13 Mental illness as a predictor of BMI assessment

Three studies compared the rate of BMI reporting for those with 'mental illness',<sup>72</sup> 'serious mental illness',<sup>68</sup> or 'severe mental illness'<sup>79</sup> to those without. These studies returned strongly

heterogeneous results ( $I^2=99.6\%$ ) and the pooled risk ratio (Table S6.13) did not provide any statistically significant evidence of association between mental illness and BMI assessment.

Table S6.13 Summary statistics from the meta-analysis of those with mental illness relative to those without

|                | Reference category | No. of studies | Pooled risk ratio | $I^2$ , heterogeneity test p-value |
|----------------|--------------------|----------------|-------------------|------------------------------------|
| Mental illness | Not present        | 3              | 1.16 (0.79,1.70)  | 99.6%, $p<0.001$                   |

#### S6.14 Depression as a predictor of BMI assessment

Three studies compared the rate of BMI reporting for those with ‘depression’,<sup>75 77</sup> or ‘depression and anxiety’<sup>82</sup> to those without. These studies returned strongly heterogeneous results ( $I^2=98.7\%$ ) and the pooled risk ratio (Table S6.14) did not provide statistically significant evidence of association between mental illness and BMI assessment.

Table S6.14 Summary statistics from the meta-analysis of those with depression relative to those without

|            | Reference category | No. of studies | Pooled risk ratio | $I^2$ , heterogeneity test p-value |
|------------|--------------------|----------------|-------------------|------------------------------------|
| Depression | Not present        | 3              | 1.22 (0.85,1.74)  | 98.7%, $p<0.001$                   |



**Supplementary Table S7: References**

1. Benson C, Kisely S, Korman N, et al. Compliance of metabolic monitoring at rehabilitation facilities. *Australasian Psychiatry* 2018;26(1):41-46. doi: <http://dx.doi.org/10.1177/1039856217737899>
2. Bleich SN, Bennett WL, Gudzone KA, et al. Impact of physician BMI on obesity care and beliefs. *Obesity* 2012;20(5):999-1005. doi: <https://dx.doi.org/10.1038/oby.2011.402>
3. Bocquier A, Verger P, Basdevant A, et al. Overweight and obesity: knowledge, attitudes, and practices of general practitioners in france. *Obesity Research* 2005;13(4):787-95.
4. Campbell K, Engel H, Timperio A, et al. Obesity management: Australian general practitioners' attitudes and practices. *Obesity Research* 2000;8(6):459-66.
5. Fruh SM, Golden A, Graves RJ, et al. Advanced Practice Nursing student knowledge in obesity management: A mixed methods research study. *Nurse Education Today* 2019;77:59-64. doi: 10.1016/j.nedt.2019.03.006
6. Hauff C, Fruh SM, Sims BM, et al. Nurse practitioner students' observations of preceptor engagement in obesity management and weight bias: A mixed-methods approach. *Journal of the American Association of Nurse Practitioners* 2020;32(7):520-29. doi: <http://dx.doi.org/10.1097/JXX.0000000000000440>
7. Huber CA, Mohler-Kuo M, Zellweger U, et al. Obesity management and continuing medical education in primary care: results of a Swiss survey. *BMC Family Practice* 2011;12:140. doi: <https://dx.doi.org/10.1186/1471-2296-12-140>
8. Hyer S, Edwards J. Weight Management Practices Among Florida Nurse Practitioners: A Cross-Sectional Study. *Journal for Nurse Practitioners* 2020;16(2):131-35. doi: 10.1016/j.nurpra.2019.10.025

- 1  
2  
3 9. Laidlaw A, Napier C, Neville F, et al. Talking about weight talk: primary care practitioner  
4  
5 knowledge, attitudes and practice. *Journal of Communication in Healthcare*  
6  
7 2019;12(3/4):145-53. doi: 10.1080/17538068.2019.1646061  
8  
9
- 10 10. McLaughlin JC, Hamilton K, Kipping R. Epidemiology of adult overweight recording  
11  
12 and management by UK GPs: a systematic review. *Br J Gen Pract*  
13  
14 2017;67(663):e676-e83. doi: 10.3399/bjgp17X692309 [published Online First:  
15  
16 2017/08/30]  
17  
18
- 19 11. Ruser CB, Sanders L, Brescia GR, et al. Identification and management of overweight  
20  
21 and obesity by internal medicine residents. *Journal of General Internal Medicine*  
22  
23 2005;20(12):1139-41.  
24  
25
- 26 12. Sebiany AM. Primary care physicians' knowledge and perceived barriers in the  
27  
28 management of overweight and obesity. *J Family Community Med* 2013;20(3):147-  
29  
30 52. doi: <https://dx.doi.org/10.4103/2230-8229.121972>  
31  
32
- 33 13. Smith K, James K, Standard-Goldson A. Adult obesity: Management practices of general  
34  
35 practitioners/ family physicians in Kingston and St Andrew, Jamaica. *West Indian*  
36  
37 *Medical Journal* 2018;67(5):433-38. doi: <http://dx.doi.org/10.7727/wimj.2018.184>  
38  
39
- 40 14. Smith PD, O'Halloran P, Hahn DL, et al. Screening for obesity: clinical tools in evolution,  
41  
42 a WREN study. *Wmj* 2010;109(5):274-78.  
43  
44
- 45 15. Sze Y, Dixon L, Paterson H, et al. New Zealand LMC midwives' approaches to  
46  
47 discussing nutrition, activity and weight gain during pregnancy. *New Zealand College*  
48  
49 *of Midwives Journal* 2014(50):24-29. doi: 10.12784/nzcomjn150.2014.4.24-29  
50  
51
- 52 16. Critchlow N, Rosenberg G, Rungay H, et al. Weight assessment and the provision of  
53  
54 weight management advice in primary care: a cross-sectional survey of self-reported  
55  
56 practice among general practitioners and practice nurses in the United Kingdom. *BMC*  
57  
58 *Family Practice* 2020;21(1):1-12. doi: 10.1186/s12875-020-01184-z  
59  
60

- 1  
2  
3  
4  
5  
6  
7  
8  
9  
10  
11  
12  
13  
14  
15  
16  
17  
18  
19  
20  
21  
22  
23  
24  
25  
26  
27  
28  
29  
30  
31  
32  
33  
34  
35  
36  
37  
38  
39  
40  
41  
42  
43  
44  
45  
46  
47  
48  
49  
50  
51  
52  
53  
54  
55  
56  
57  
58  
59  
60
17. Jimenez G, Tyagi S, Car J. Computer-assisted history taking for the improvement of the diabetes primary care consultation. *Diabetes Technology and Therapeutics* 2020;22(Supplement 1):A156-A57. doi: <http://dx.doi.org/10.1089/dia.2020.2525.abstracts>
  18. Fruh SM, Golden A, Graves RJ, et al. Advanced Practice Nursing student knowledge in obesity management: A mixed methods research study. *Nurse education today* 2019;77:59-64.
  19. Nanda S, Adusumalli J, Hurt RT, et al. Obesity Management Education Needs Among General Internists: A Survey. *Journal of primary care & community health* 2021;12:21501327211013292.
  20. Baillargeon JP, St-Cyr-Tribble D, Xhignesse M, et al. Impact of an educational intervention combining clinical obesity preceptorship with electronic networking tools on primary care professionals: a prospective study. *BMC Medical Education* 2020;20(1):361. doi: <https://dx.doi.org/10.1186/s12909-020-02248-5>
  21. Barnes ER, Theeke LA, Mallow J. Impact of the Provider and Healthcare team Adherence to Treatment Guidelines ( PHAT- G) intervention on adherence to national obesity clinical practice guidelines in a primary care centre. *Journal of Evaluation in Clinical Practice* 2015;21(2):300-06. doi: 10.1111/jep.12308
  22. Berry AC, Berry NA, Myers TS, et al. Physician Body Mass Index and Bias Toward Obesity Documentation Patterns. *Ochsner Journal* 2018;18(1):66-71.
  23. Bleich SN, Gudzone KA, Bennett WL, et al. How does physician BMI impact patient trust and perceived stigma? *Preventive Medicine* 2013;57(2):120-24. doi: 10.1016/j.ypmed.2013.05.005

- 1  
2  
3 24. Bronder KL, Dooyema CA, Onufrak SJ, et al. Electronic health records to support  
4  
5 obesity-related patient care: Results from a survey of United States physicians.  
6  
7 *Preventive Medicine* 2015;77:41-47. doi: 10.1016/j.ypmed.2015.04.018  
8  
9
- 10 25. Engstrom M, Skytt B, Ernesater A, et al. District nurses' self-reported clinical activities,  
11  
12 beliefs about and attitudes towards obesity management. *Applied Nursing Research*  
13  
14 2013;26(4):198-203. doi: <https://dx.doi.org/10.1016/j.apnr.2013.06.009>  
15  
16
- 17 26. Forster AS, Burgess C, Dodhia H, et al. Do health checks improve risk factor detection in  
18  
19 primary care? Matched cohort study using electronic health records. *Journal of Public*  
20  
21 *Health* 2016;38(3):552-59. doi: 10.1093/pubmed/fdv119  
22  
23
- 24 27. Trujillo-Garrido N, Bernal-Jimenez MA, Santi-Cano MJ. Evaluation of Obesity  
25  
26 Management Recorded in Electronic Clinical History: A Cohort Study. *Journal of*  
27  
28 *Clinical Medicine* 2020;9(8):23. doi: <https://dx.doi.org/10.3390/jcm9082345>  
29  
30
- 31 28. Antognoli EL, Seeholzer EL, Gullett H, et al. Primary Care Resident Training for  
32  
33 Obesity, Nutrition, and Physical Activity Counseling: A Mixed-Methods Study.  
34  
35 *Health Promotion Practice* 2017;18(5):672-80. doi: 10.1177/1524839916658025  
36  
37
- 38 29. AuYoung M, Duru OK, Ponce NA, et al. Frontline Experiences of a Practice Redesign to  
39  
40 Improve Self-management of Obesity in Safety Net Clinics. *Journal of Ambulatory*  
41  
42 *Care Management* 2015;38(2):153-63. doi: 10.1097/JAC.0000000000000063  
43  
44
- 45 30. Binhemd T, Larbi EB, Absood G. Obesity in a primary health care centre: A retrospective  
46  
47 study. *Annals of Saudi Medicine* 1991;11(2):163-6.  
48
- 49 31. Bonney A, MacKinnon D, Barnett S, et al. A mixed-methods feasibility study of routinely  
50  
51 weighing patients in general practice to aid weight management. *Australian Family*  
52  
53 *Physician* 2017;46(12):928-33.  
54  
55
- 56 32. Brixner D, Said Q, Kirkness C, et al. Assessment of cardiometabolic risk factors in a  
57  
58 national primary care electronic health record database. *Value in Health*  
59  
60

- 2007;10(SUPPL. 1):S29-S36. doi: <http://dx.doi.org/10.1111/j.1524-4733.2006.00152.x>
33. Bryant J, Sze Lin Y, Sanson-Fisher R, et al. Is identification of smoking, risky alcohol consumption and overweight and obesity by General Practitioners improving? A comparison over time. *Family Practice* 2015;32(6):664-71. doi: 10.1093/fampra/cmz078
34. Castillejos MC, Martín-Pérez C, García-Ruiz A, et al. Recording of cardiovascular risk factors by general practitioners in patients with schizophrenia. *Annals of General Psychiatry* 2020;19(1):1-8. doi: 10.1186/s12991-020-00284-5
35. Davis NJ, Emerenini A, Wylie-Rosett J. Obesity management: physician practice patterns and patient preference. *Diabetes Educator* 2006;32(4):557-61.
36. Dutton GR, Herman KG, Tan F, et al. Patient and physician characteristics associated with the provision of weight loss counseling in primary care. *Obesity Research & Clinical Practice* 2014;8(2):e123-30. doi: <https://dx.doi.org/10.1016/j.orcp.2012.12.004>
37. Fitzpatrick SL, Dickins K, Avery E, et al. Effect of an obesity best practice alert on physician documentation and referral practices. *Translational Behavioral Medicine* 2017;7(4):881-90. doi: <https://dx.doi.org/10.1007/s13142-017-0514-0>
38. Gibbs HD, Broom J, Brown J, et al. Current approaches to obesity management in UK primary care: The counterweight programme. *Journal of Human Nutrition and Dietetics* 2004;17(3):183-90. doi: <http://dx.doi.org/10.1111/j.1365-277X.2004.00528.x>
39. Heywood A, Ring I, Sanson-Fisher R, et al. Screening for cardiovascular disease and risk reduction counselling behaviors of general practitioners. *Preventive Medicine* 1994;23(3):292-301.

- 1  
2  
3  
4  
5  
6  
7  
8  
9  
10  
11  
12  
13  
14  
15  
16  
17  
18  
19  
20  
21  
22  
23  
24  
25  
26  
27  
28  
29  
30  
31  
32  
33  
34  
35  
36  
37  
38  
39  
40  
41  
42  
43  
44  
45  
46  
47  
48  
49  
50  
51  
52  
53  
54  
55  
56  
57  
58  
59  
60
40. Klein Woolthuis EP, de Grauw WJC, van Gerwen WHEM, et al. Identifying people at risk for undiagnosed type 2 diabetes using the GP's electronic medical record. *Family Practice* 2007;24(3):230-36. doi: <http://dx.doi.org/10.1093/fampra/cmm018>
41. Bordowitz R, Morland K, Reich D. The use of an electronic medical record to improve documentation and treatment of obesity. *Family Medicine* 2007;39(4):274-9.
42. Logue E, Gilchrist V, Bourguet C, et al. Recognition and management of obesity in a family practice setting. *Journal of the American Board of Family Practice* 1993;6(5):457-63.
43. Thapa R, Friderici J, Kleppel R, et al. Do physicians underrecognize obesity? *Southern Medical Journal* 2014;107(6):356-60. doi: <https://dx.doi.org/10.14423/01.SMJ.0000450707.44388.0c>
44. Lemay CA, Cashman S, Savageau J, et al. Underdiagnosis of obesity at a community health center. *Journal of the American Board of Family Practice* 2003;16(1):14-21.
45. Funk LM, Ying S, Voils CI, et al. Electronic Health Record Data Versus the National Health and Nutrition Examination Survey (NHANES): A Comparison of Overweight and Obesity Rates. *Medical Care* 2017;55(6):598-605. doi: 10.1097/MLR.0000000000000693
46. Andreacchi AT, Griffith LE, Guindon GE, et al. Body mass index, waist circumference, waist-to-hip ratio, and body fat in relation to health care use in the Canadian Longitudinal Study on Aging. *International Journal of Obesity* 2021;45(3):666-76.
47. Bhanji S, Khuwaja AK, Siddiqui F, et al. Underestimation of weight and its associated factors among overweight and obese adults in Pakistan: a cross sectional study. *BMC public health* 2011;11(1):363.

- 1  
2  
3 48. Ewe MB, Lydell M, Bergh H, et al. Characteristics of patients seeking a health promotion  
4 and weight reduction program in primary care. *Journal of Multidisciplinary*  
5  
6 *Healthcare* 2019;12:235-42. doi: <http://dx.doi.org/10.2147/JMDH.S195269>  
7  
8  
9
- 10 49. Sebo P, Herrmann FR, Haller DM. Accuracy of anthropometric measurements by general  
11  
12 practitioners in overweight and obese patients. *BMC Obesity* 2017;4(1) (no  
13  
14 pagination)  
15
- 16 50. Spencer L, O'Shea MC, Ball L, et al. Attendance, weight and waist circumference  
17  
18 outcomes of patients with type 2 diabetes receiving Medicare-subsidised dietetic  
19  
20 services. *Australian Journal of Primary Health* 2014;20(3):291-97.  
21  
22  
23
- 24 51. Vrdoljak D, Markovic BB, Kranjcevic K, et al. How well do anthropometric indices  
25  
26 correlate with cardiovascular risk factors? A cross-sectional study in Croati. *Medical*  
27  
28 *Science Monitor* 2012;18(2):PH6-PH11.  
29
- 30 52. Forgione N, Deed G, Kilov G, et al. Managing Obesity in Primary Care: Breaking Down  
31  
32 the Barriers. *Advances in Therapy* 2018;35(2):191-98.  
33  
34
- 35 53. Ashman F, Sturgiss E, Haesler E. Exploring Self-Efficacy in Australian General  
36  
37 Practitioners Managing Patient Obesity: A Qualitative Survey Study. *int*  
38  
39 2016;2016:8212837. doi: <https://dx.doi.org/10.1155/2016/8212837>  
40  
41
- 42 54. Baker AM, Smith KC, Coa KI, et al. Clinical Care Providers' Perspectives on Body Size  
43  
44 and Weight Management Among Long-Term Cancer Survivors. *Integrative Cancer*  
45  
46 *Therapies* 2015;14(3):240-48. doi: 10.1177/1534735415572882  
47  
48
- 49 55. Bornhoeft K. Perceptions, Attitudes, and Behaviors of Primary Care Providers Toward  
50  
51 Obesity Management: A Qualitative Study. *Journal of Community Health Nursing*  
52  
53 2018;35(3):85-101. doi: 10.1080/07370016.2018.1475792  
54  
55
- 56 56. Mazza D, McCarthy E, Carey M, et al. "90% of the time, it's not just weight": General  
57  
58 practitioner and practice staff perspectives regarding the barriers and enablers to  
59  
60

- 1  
2  
3 obesity guideline implementation. *Obesity Research & Clinical Practice*  
4  
5 2019;13(4):398-403. doi: <https://dx.doi.org/10.1016/j.orcp.2019.04.001>  
6  
7
- 8 57. Asselin JD, Osunlana A, Ogunleye A, et al. Hidden in plain sight: The embedded nature  
9  
10 of obesity in primary care visits. *Canadian Journal of Diabetes* 2015;1):S53.  
11
- 12 58. Gunther S, Guo F, Sinfield P, et al. Barriers and enablers to managing obesity in general  
13  
14 practice: a practical approach for use in implementation activities. *Quality in Primary*  
15  
16 *Care* 2012;20(2):93-103.  
17
- 18 59. Aboueid S, Bourgeault I, Giroux I. Nutrition care practices of primary care providers for  
19  
20 weight management in multidisciplinary primary care settings in Ontario, Canada - a  
21  
22 qualitative study. *BMC Family Practice* 2018;19(1):69. doi:  
23  
24 <https://dx.doi.org/10.1186/s12875-018-0760-3>  
25  
26  
27
- 28 60. Campbell K, Engel H, Timperio A, et al. Obesity management: Australian general  
29  
30 practitioners' attitudes and practices. *Obesity research* 2000;8(6):459-66.  
31  
32
- 33 61. Doherty AJ, Jones SP, Chauhan U, et al. Healthcare practitioners' views and experiences  
34  
35 of barriers and facilitators to weight management interventions for adults with  
36  
37 intellectual disabilities. *Journal of applied research in intellectual disabilities* :  
38  
39 *JARID* 2019;32(5):1067-77.  
40  
41
- 42 62. Bocquier A, Verger P, Basdevant A, et al. Overweight and obesity: knowledge, attitudes,  
43  
44 and practices of general practitioners in france. *Obesity research* 2005;13(4):787-95.  
45  
46
- 47 63. Aleem S, Lasky R, Brooks WB, et al. Obesity perceptions and documentation among  
48  
49 primary care clinicians at a rural academic health center. *Obesity Research and*  
50  
51 *Clinical Practice* 2015;9(4):408-15. doi: <http://dx.doi.org/10.1016/j.orcp.2015.08.014>  
52  
53
- 54 64. Baer HJ, Karson AS, Soukup JR, et al. Documentation and diagnosis of overweight and  
55  
56 obesity in electronic health records of adult primary care patients. *JAMA Internal*  
57  
58 *Medicine* 2013;173(17):1648-52. doi: 10.1001/jamainternmed.2013.7815  
59  
60



- 1  
2  
3 65. Bleich SN, Pickett-Blakely O, Cooper LA, et al. Physician practice patterns of obesity  
4 diagnosis and weight-related counseling. *Patient Education & Counseling*  
5 2011;82(1):123-29. doi: 10.1016/j.pec.2010.02.018  
6  
7  
8  
9  
10 66. Booth HP, Prevost AT, Gulliford MC. Epidemiology of clinical body mass index  
11 recording in an obese population in primary care: a cohort study. *Journal of Public*  
12 *Health* 2013;35(1):67-74. doi: pubmed/fds063  
13  
14  
15  
16  
17 67. Bramlage P, Wittchen HU, Pittrow D, et al. Recognition and management of overweight  
18 and obesity in primary care in Germany. *Int J Obes Relat Metab Disord*  
19 2004;28(10):1299-308.  
20  
21  
22  
23  
24 68. Cuccu Z, Abi-Aad G, Duggal A. Characteristics of patients with body mass index  
25 recorded within the Kent Integrated Dataset (KID). *BMJ health & care informatics*  
26 2019;26(1) doi: <http://dx.doi.org/10.1136/bmjhci-2019-000026>  
27  
28  
29  
30  
31 69. Cyr PR, Haskins AE, Holt C, et al. Weighty Problems: Predictors of Family Physicians  
32 Documenting Overweight and Obesity. *Family Medicine* 2016;48(3):217-21.  
33  
34  
35  
36 70. Dalton A, Bottle A, Okoro C, et al. Implementation of the NHS Health Checks  
37 programme: Baseline assessment of risk factor recording in an urban culturally  
38 diverse setting. *Family practice* 2011;28:34-40. doi: 10.1093/fampra/cmq068  
39  
40  
41  
42 71. Emanuel G, Charlton J, Ashworth M, et al. Cardiovascular risk assessment and treatment  
43 in chronic inflammatory disorders in primary care. *Heart* 2016;102(24):1957-62. doi:  
44 <https://dx.doi.org/10.1136/heartjnl-2016-310111>  
45  
46  
47  
48  
49 72. Ghosh A. Depressed, anxious and breathless missing out: Weight screening in general  
50 practice in a regional catchment of New South Wales. *Australian Journal of Rural*  
51 *Health* 2016;24(4):246-52. doi: 10.1111/ajr.12264  
52  
53  
54  
55  
56 73. Gonzalez-Chica DA, Bowden J, Miller C, et al. Patient-reported GP health assessments  
57 rather than individual cardiovascular risk burden are associated with the engagement  
58  
59  
60

- 1  
2  
3 in lifestyle changes: population-based survey in South Australia. *BMC Family*  
4  
5 *Practice* 2019;20(1):1-10. doi: 10.1186/s12875-019-1066-9  
6  
7  
8 74. Gutierrez Angulo ML, Amenabar Azurmendi MD, Cuesta Sole ML, et al. Prevalence of  
9  
10 obesity recorded in Primary Care. *Endocrinologia y Nutricion* 2014;61(9):469-73.  
11  
12 doi: <https://dx.doi.org/10.1016/j.endonu.2014.03.012>  
13  
14  
15 75. Mattar A, Carlston D, Sariol G, et al. The prevalence of obesity documentation in Primary  
16  
17 Care Electronic Medical Records. Are we acknowledging the problem? *Applied*  
18  
19 *Clinical Informatics* 2017;8(1):67-79. doi: [https://dx.doi.org/10.4338/ACI-2016-07-](https://dx.doi.org/10.4338/ACI-2016-07-RA-0115)  
20  
21 [RA-0115](https://dx.doi.org/10.4338/ACI-2016-07-RA-0115)  
22  
23  
24 76. Melamed OC, Nakar S, Vinker S. Suboptimal identification of obesity by family  
25  
26 physicians. *American Journal of Managed Care* 2009;15(9):619-24.  
27  
28  
29 77. Mocarski M, Tian Y, Smolarz BG, et al. Use of International Classification of Diseases,  
30  
31 Ninth Revision Codes for Obesity: Trends in the United States from an Electronic  
32  
33 Health Record-Derived Database. *Population Health Management* 2018;21(3):222-  
34  
35 30. doi: <https://dx.doi.org/10.1089/pop.2017.0092>  
36  
37  
38 78. Nicholson BD, Aveyard P, Bankhead CR, et al. Determinants and extent of weight  
39  
40 recording in UK primary care: an analysis of 5 million adults' electronic health  
41  
42 records from 2000 to 2017. *BMC Medicine* 2019;17(1):222-22. doi: 10.1186/s12916-  
43  
44 019-1446-y  
45  
46  
47 79. Osborn DPJ, Baio G, Walters KR, et al. Inequalities in the provision of cardiovascular  
48  
49 screening to people with severe mental illnesses in primary care Cohort study in the  
50  
51 United Kingdom THIN Primary Care Database 2000 2007. *Schizophrenia Research*  
52  
53 2011;129:104-10.  
54  
55  
56  
57  
58  
59  
60

- 1  
2  
3 80. Rose SA, Turchin A, Grant RW, et al. Documentation of body mass index and control of  
4 associated risk factors in a large primary care network. *BMC Health Services*  
5 *Research* 2009;9:236-36. doi: 10.1186/1472-6963-9-236  
6  
7  
8  
9  
10 81. Ruser CB, Sanders L, Brescia GR, et al. Brief Report: Identification and management of  
11 overweight and obesity by internal medicine residents. *Journal of General Internal*  
12 *Medicine* 2005;20(12):1139-41. doi: [http://dx.doi.org/10.1111/j.1525-](http://dx.doi.org/10.1111/j.1525-1497.2005.0263.x)  
13 [1497.2005.0263.x](http://dx.doi.org/10.1111/j.1525-1497.2005.0263.x)  
14  
15  
16  
17  
18  
19 82. Turner LR, Harris MF, Mazza D. Obesity management in general practice: does current  
20 practice match guideline recommendations? *Med J Aust* 2015;202(7):370-2. doi:  
21 10.5694/mja14.00998 [published Online First: 2015/04/17]  
22  
23  
24  
25  
26 83. Verberne LDM, Nielen MMJ, Leemrijse CJ, et al. Recording of weight in electronic  
27 health records: an observational study in general practice. *BMC family practice*  
28 2018;19(1):174. doi: <http://dx.doi.org/10.1186/s12875-018-0863-x>  
29  
30  
31  
32  
33 84. Yoong SL, Carey ML, Sanson-Fisher RW, et al. A cross-sectional study examining  
34 Australian general practitioners' identification of overweight and obese patients.  
35 *JGIM: Journal of General Internal Medicine* 2014;29(2):328-34. doi:  
36 10.1007/s11606-013-2637-4  
37  
38  
39  
40  
41  
42 85. Dunkley AJ, Stone MA, Patel N, et al. Waist circumference measurement: knowledge,  
43 attitudes and barriers in patients and practitioners in a multi-ethnic population. *Family*  
44 *Practice* 2009;26(5):365-71. doi: <https://dx.doi.org/10.1093/fampra/cmp048>  
45  
46  
47  
48  
49 86. Gaynor B, Habermann B, Wright R. Waist Circumference Measurement Diffusion in  
50 Primary Care. *The Journal for Nurse Practitioners* 2018;14(9):683-88.e1. doi:  
51 10.1016/j.nurpra.2018.06.002  
52  
53  
54  
55  
56  
57  
58  
59  
60

- 1  
2  
3 87. McHale CT, Laidlaw AH, Cecil JE. Primary care patient and practitioner views of weight  
4 and weight-related discussion: a mixed-methods study. *BMJ Open* 2020;10(3):(no  
5 pagination). doi: <https://dx.doi.org/10.1136/bmjopen-2019-034023>  
6  
7  
8  
9  
10 88. Borenstein M, Hedges L, Higgins J, et al. *Introduction to Meta-Analysis* 2021.  
11  
12  
13  
14  
15  
16  
17  
18  
19  
20  
21  
22  
23  
24  
25  
26  
27  
28  
29  
30  
31  
32  
33  
34  
35  
36  
37  
38  
39  
40  
41  
42  
43  
44  
45  
46  
47  
48  
49  
50  
51  
52  
53  
54  
55  
56  
57  
58  
59  
60

For peer review only

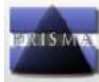

## PRISMA 2020 Checklist

| Section and Topic             | Item # | Checklist item                                                                                                                                                                                                                                                                                       | Location where item is reported |
|-------------------------------|--------|------------------------------------------------------------------------------------------------------------------------------------------------------------------------------------------------------------------------------------------------------------------------------------------------------|---------------------------------|
| <b>TITLE</b>                  |        |                                                                                                                                                                                                                                                                                                      |                                 |
| Title                         | 1      | Identify the report as a systematic review.                                                                                                                                                                                                                                                          | 1                               |
| <b>ABSTRACT</b>               |        |                                                                                                                                                                                                                                                                                                      |                                 |
| Abstract                      | 2      | See the PRISMA 2020 for Abstracts checklist.                                                                                                                                                                                                                                                         | 2                               |
| <b>INTRODUCTION</b>           |        |                                                                                                                                                                                                                                                                                                      |                                 |
| Rationale                     | 3      | Describe the rationale for the review in the context of existing knowledge.                                                                                                                                                                                                                          | 4                               |
| Objectives                    | 4      | Provide an explicit statement of the objective(s) or question(s) the review addresses.                                                                                                                                                                                                               | 4                               |
| <b>METHODS</b>                |        |                                                                                                                                                                                                                                                                                                      |                                 |
| Eligibility criteria          | 5      | Specify the inclusion and exclusion criteria for the review and how studies were grouped for the syntheses.                                                                                                                                                                                          | 4,5                             |
| Information sources           | 6      | Specify all databases, registers, websites, organisations, reference lists and other sources searched or consulted to identify studies. Specify the date when each source was last searched or consulted.                                                                                            | 6                               |
| Search strategy               | 7      | Present the full search strategies for all databases, registers and websites, including any filters and limits used.                                                                                                                                                                                 | Supplementary Table S1          |
| Selection process             | 8      | Specify the methods used to decide whether a study met the inclusion criteria of the review, including how many reviewers screened each record and each report retrieved, whether they worked independently, and if applicable, details of automation tools used in the process.                     | 6                               |
| Data collection process       | 9      | Specify the methods used to collect data from reports, including how many reviewers collected data from each report, whether they worked independently, any processes for obtaining or confirming data from study investigators, and if applicable, details of automation tools used in the process. | 6                               |
| Data items                    | 10a    | List and define all outcomes for which data were sought. Specify whether all results that were compatible with each outcome domain in each study were sought (e.g. for all measures, time points, analyses), and if not, the methods used to decide which results to collect.                        | 5,6                             |
|                               | 10b    | List and define all other variables for which data were sought (e.g. participant and intervention characteristics, funding sources). Describe any assumptions made about any missing or unclear information.                                                                                         | 5,6                             |
| Study risk of bias assessment | 11     | Specify the methods used to assess risk of bias in the included studies, including details of the tool(s) used, how many reviewers assessed each study and whether they worked independently, and if applicable, details of automation tools used in the process.                                    | 6                               |
| Effect measures               | 12     | Specify for each outcome the effect measure(s) (e.g. risk ratio, mean difference) used in the synthesis or presentation of results.                                                                                                                                                                  | 7                               |
| Synthesis methods             | 13a    | Describe the processes used to decide which studies were eligible for each synthesis (e.g. tabulating the study intervention characteristics and comparing against the planned groups for each synthesis (item #5)).                                                                                 | 7,8                             |
|                               | 13b    | Describe any methods required to prepare the data for presentation or synthesis, such as handling of missing summary statistics, or data conversions.                                                                                                                                                | 7,8                             |
|                               | 13c    | Describe any methods used to tabulate or visually display results of individual studies and syntheses.                                                                                                                                                                                               | 7,8                             |
|                               | 13d    | Describe any methods used to synthesize results and provide a rationale for the choice(s). If meta-analysis was performed, describe the model(s), method(s) to identify the presence and extent of statistical heterogeneity, and software package(s) used.                                          | 7,8                             |
|                               | 13e    | Describe any methods used to explore possible causes of heterogeneity among study results (e.g. subgroup analysis, meta-regression).                                                                                                                                                                 | 7,8                             |
|                               | 13f    | Describe any sensitivity analyses conducted to assess robustness of the synthesized results.                                                                                                                                                                                                         | 7,8                             |
| Reporting bias assessment     | 14     | Describe any methods used to assess risk of bias due to missing results in a synthesis (arising from reporting biases).                                                                                                                                                                              | 8                               |

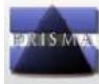

## PRISMA 2020 Checklist

| Section and Topic             | Item # | Checklist item                                                                                                                                                                                                                                                                       | Location where item is reported |
|-------------------------------|--------|--------------------------------------------------------------------------------------------------------------------------------------------------------------------------------------------------------------------------------------------------------------------------------------|---------------------------------|
| Certainty assessment          | 15     | Describe any methods used to assess certainty (or confidence) in the body of evidence for an outcome.                                                                                                                                                                                | 7,8                             |
| <b>RESULTS</b>                |        |                                                                                                                                                                                                                                                                                      |                                 |
| Study selection               | 16a    | Describe the results of the search and selection process, from the number of records identified in the search to the number of studies included in the review, ideally using a flow diagram.                                                                                         | 9                               |
|                               | 16b    | Cite studies that might appear to meet the inclusion criteria, but which were excluded, and explain why they were excluded.                                                                                                                                                          | Supplementary Table S2          |
| Study characteristics         | 17     | Cite each included study and present its characteristics.                                                                                                                                                                                                                            | Supplementary Tables S3 and S4) |
| Risk of bias in studies       | 18     | Present assessments of risk of bias for each included study.                                                                                                                                                                                                                         | Supplementary Table S           |
| Results of individual studies | 19     | For all outcomes, present, for each study: (a) summary statistics for each group (where appropriate) and (b) an effect estimate and its precision (e.g. confidence/credible interval), ideally using structured tables or plots.                                                     | 10-13<br>Supplementary          |
| Results of syntheses          | 20a    | For each synthesis, briefly summarise the characteristics and risk of bias among contributing studies.                                                                                                                                                                               | 10-13,<br>Supplementary         |
|                               | 20b    | Present results of all statistical syntheses conducted. If meta-analysis was done, present for each the summary estimate and its precision (e.g. confidence/credible interval) and measures of statistical heterogeneity. If comparing groups, describe the direction of the effect. | 10-13<br>Supplementary          |
|                               | 20c    | Present results of all investigations of possible causes of heterogeneity among study results.                                                                                                                                                                                       | 10-13<br>Supplementary          |
|                               | 20d    | Present results of all sensitivity analyses conducted to assess the robustness of the synthesized results.                                                                                                                                                                           | 10-13<br>Supplementary          |
| Reporting biases              | 21     | Present assessments of risk of bias due to missing results (arising from reporting biases) for each synthesis assessed.                                                                                                                                                              | 10-13<br>Supplementary          |
| Certainty of evidence         | 22     | Present assessments of certainty (or confidence) in the body of evidence for each outcome assessed.                                                                                                                                                                                  | 10-13<br>Supplementary          |
| <b>DISCUSSION</b>             |        |                                                                                                                                                                                                                                                                                      |                                 |
| Discussion                    | 23a    | Provide a general interpretation of the results in the context of other evidence.                                                                                                                                                                                                    | 16-17                           |
|                               | 23b    | Discuss any limitations of the evidence included in the review.                                                                                                                                                                                                                      | 18                              |
|                               | 23c    | Discuss any limitations of the review processes used.                                                                                                                                                                                                                                | 18                              |
|                               | 23d    | Discuss implications of the results for practice, policy, and future research.                                                                                                                                                                                                       | 16, 18, 19                      |
| <b>OTHER INFORMATION</b>      |        |                                                                                                                                                                                                                                                                                      |                                 |
| Registration and              | 24a    | Provide registration information for the review, including register name and registration number, or state that the review was not registered.                                                                                                                                       | 20                              |

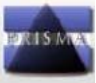

# PRISMA 2020 Checklist

1  
2  
3  
4  
5  
6  
7  
8  
9  
10  
11  
12  
13  
14  
15  
16  
17  
18  
19  
20  
21  
22  
23  
24  
25  
26  
27  
28  
29  
30  
31  
32  
33  
34  
35  
36  
37  
38  
39  
40  
41  
42  
43  
44  
45  
46  
47

| Section and Topic                              | Item # | Checklist item                                                                                                                                                                                                                             | Location where item is reported |
|------------------------------------------------|--------|--------------------------------------------------------------------------------------------------------------------------------------------------------------------------------------------------------------------------------------------|---------------------------------|
| protocol                                       | 24b    | Indicate where the review protocol can be accessed, or state that a protocol was not prepared.                                                                                                                                             | 20                              |
|                                                | 24c    | Describe and explain any amendments to information provided at registration or in the protocol.                                                                                                                                            | Not applicable                  |
| Support                                        | 25     | Describe sources of financial or non-financial support for the review, and the role of the funders or sponsors in the review.                                                                                                              | 19                              |
| Competing interests                            | 26     | Declare any competing interests of review authors.                                                                                                                                                                                         | 19                              |
| Availability of data, code and other materials | 27     | Report which of the following are publicly available and where they can be found: template data collection forms; data extracted from included studies; data used for all analyses; analytic code; any other materials used in the review. | 20                              |

From: Page MJ, McKenzie JE, Bossuyt PM, Boutron I, Hoffmann TC, Mulrow CD, et al. The PRISMA 2020 statement: an updated guideline for reporting systematic reviews. *BMJ* 2021;372:n71. doi: 10.1136/bmj.n71  
 For more information, visit: <http://www.prisma-statement.org/>

# BMJ Open

## Enablers and barriers to implementing obesity assessments in clinical practice: a rapid mixed methods systematic review

|                                 |                                                                                                                                                                                                                                                                                                                                                                                                                                                                                                                                 |
|---------------------------------|---------------------------------------------------------------------------------------------------------------------------------------------------------------------------------------------------------------------------------------------------------------------------------------------------------------------------------------------------------------------------------------------------------------------------------------------------------------------------------------------------------------------------------|
| Journal:                        | <i>BMJ Open</i>                                                                                                                                                                                                                                                                                                                                                                                                                                                                                                                 |
| Manuscript ID                   | bmjopen-2022-063659.R1                                                                                                                                                                                                                                                                                                                                                                                                                                                                                                          |
| Article Type:                   | Original research                                                                                                                                                                                                                                                                                                                                                                                                                                                                                                               |
| Date Submitted by the Author:   | 12-Oct-2022                                                                                                                                                                                                                                                                                                                                                                                                                                                                                                                     |
| Complete List of Authors:       | Atlantis, Evan; Western Sydney University, Chimoriya, Ritesh; Western Sydney University, Seifu, Canaan; Western Sydney University, Peters, Kath; Western Sydney University, Murphy, Gill; Western Sydney University, Carr, Bernadette ; University of Sydney - Camperdown and Darlington Campus Burkitt-Ford Library<br>Lim, David; Western Sydney University - Campbelltown Campus, School of Health Sciences; Flinders University, Centre for Remote Health<br>Fahey, P; Western Sydney University, School of Health Sciences |
| <b>Primary Subject Heading</b>: | General practice / Family practice                                                                                                                                                                                                                                                                                                                                                                                                                                                                                              |
| Secondary Subject Heading:      | Health services research                                                                                                                                                                                                                                                                                                                                                                                                                                                                                                        |
| Keywords:                       | PRIMARY CARE, Quality in health care < HEALTH SERVICES ADMINISTRATION & MANAGEMENT, PREVENTIVE MEDICINE, QUALITATIVE RESEARCH                                                                                                                                                                                                                                                                                                                                                                                                   |
|                                 |                                                                                                                                                                                                                                                                                                                                                                                                                                                                                                                                 |

SCHOLARONE™  
Manuscripts



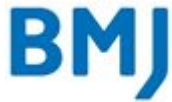

I, the Submitting Author has the right to grant and does grant on behalf of all authors of the Work (as defined in the below author licence), an exclusive licence and/or a non-exclusive licence for contributions from authors who are: i) UK Crown employees; ii) where BMJ has agreed a CC-BY licence shall apply, and/or iii) in accordance with the terms applicable for US Federal Government officers or employees acting as part of their official duties; on a worldwide, perpetual, irrevocable, royalty-free basis to BMJ Publishing Group Ltd ("BMJ") its licensees and where the relevant Journal is co-owned by BMJ to the co-owners of the Journal, to publish the Work in this journal and any other BMJ products and to exploit all rights, as set out in our [licence](#).

The Submitting Author accepts and understands that any supply made under these terms is made by BMJ to the Submitting Author unless you are acting as an employee on behalf of your employer or a postgraduate student of an affiliated institution which is paying any applicable article publishing charge ("APC") for Open Access articles. Where the Submitting Author wishes to make the Work available on an Open Access basis (and intends to pay the relevant APC), the terms of reuse of such Open Access shall be governed by a Creative Commons licence – details of these licences and which [Creative Commons](#) licence will apply to this Work are set out in our licence referred to above.

Other than as permitted in any relevant BMJ Author's Self Archiving Policies, I confirm this Work has not been accepted for publication elsewhere, is not being considered for publication elsewhere and does not duplicate material already published. I confirm all authors consent to publication of this Work and authorise the granting of this licence.

1 **Title: Enablers and barriers to implementing obesity assessments in clinical practice: a rapid mixed**  
2 **methods systematic review**  
3  
4  
5  
6

7 \*Evan Atlantis<sup>1,2,3</sup>, Ritesh Chimoriya<sup>1,2,4</sup>, Canaan Negash Seifu<sup>1</sup>, Kath Peters<sup>2,5</sup>, Gillian Murphy<sup>2,5</sup>,  
8  
9 Bernadette Carr<sup>6</sup>, David Lim<sup>1</sup>, and Paul P. Fahey<sup>1,2</sup>  
10  
11  
12  
13

14 <sup>1</sup>School of Health Sciences, Western Sydney University, Campbelltown, NSW 2560, Australia  
15

16 <sup>2</sup>Translational Health Research Institute, Western Sydney University, Campbelltown, NSW 2560, Australia  
17

18 <sup>3</sup>Discipline of Medicine, Faculty of Medicine and Health, Nepean Clinical School, The University of  
19 Sydney, Sydney, NSW 2006, Australia  
20  
21  
22

23 <sup>4</sup>School of Medicine, Western Sydney University, Campbelltown, NSW 2560, Australia  
24

25 <sup>5</sup>School of Nursing and Midwifery, Western Sydney University, Campbelltown, NSW 2560, Australia  
26  
27

28 <sup>6</sup>The University of Sydney, Sydney, NSW 2006, Australia  
29  
30  
31

32 **\*Corresponding author:**  
33  
34

35 Name: Evan Atlantis  
36

37 Email: [E.Atlantis@westernsydney.edu.au](mailto:E.Atlantis@westernsydney.edu.au)  
38  
39

40 **Short running title** Enablers and barriers to implementing obesity assessments in clinical practice  
41  
42

43 **Keywords** Weight Related Complications; Diagnostic Techniques and Procedures; Mass Screening;  
44  
45 Overweight  
46  
47  
48  
49  
50  
51  
52  
53  
54  
55  
56  
57  
58  
59  
60

## ABSTRACT

**Objectives:** This systematic review aims to improve our knowledge of enablers and barriers to implementing obesity related anthropometric assessments in clinical practice.

**Design:** A mixed methods systematic review.

**Data sources:** Medline, Embase, and CINAHL to November 2021.

**Eligibility criteria:** Quantitative studies that reported patient factors associated with obesity assessments in clinical practice (general practice or primary care); and qualitative studies that reported views of health care professionals about enablers and barriers to their implementation.

**Data extraction and synthesis:** We used random-effects meta-analysis to pool ratios for categorical predictors reported in  $\geq$ three studies expressed as pooled Risk Ratio (RR) with 95% Confidence Interval (CI), applied inverse variance weights, and investigated statistical heterogeneity ( $I^2$ ), publication bias (Egger's test), and sensitivity analyses. We used reflexive thematic analysis for qualitative data and applied a convergent integrated approach to synthesis.

**Results:** We reviewed 22 quantitative (observational) and three qualitative studies published between 2004 and 2020. All had  $\geq$ 50% of the quality items for risk of bias assessments. Obesity assessment in clinical practice was positively associated with patient factors: female sex (RR1.28, 95%CI:1.10,1.50,  $I^2$  99.8%, mostly United Kingdom/United States studies), socio-economic deprivation (RR1.21, 95%CI:1.18,1.24,  $I^2$  73.9%, United Kingdom studies), non-White race/ethnicity (RR1.27, 95%CI:1.03,1.57,  $I^2$  99.6%), and comorbidities (RR2.11, 95%CI:1.60,2.79,  $I^2$  99.6%, consistent across most countries). Obesity assessment was also most common in the heaviest body mass index group (RR1.55, 95%CI:0.99,2.45,  $I^2$  99.6%). Views of health care professionals were positive about obesity assessments when linked to patient health (convergent with meta-analysis for comorbidities) and if part of routine practice, but negative about their role, training, time, resources, and incentives in the health care system.

**Conclusions:** Our evidence synthesis revealed several important enablers and barriers to obesity assessments that should inform health care professionals and relevant stakeholders to encourage adherence to clinical practice guideline recommendations.

## Strengths and limitations of this study

- Study design that allowed a convergent integrated synthesis of evidence from quantitative and qualitative studies on the enablers and barriers to implementing obesity related anthropometric assessments in clinical practice.
- Comprehensive search strategy of major electronic databases and rigorous data extraction and risk of bias assessments.
- Conclusive results from several meta-analyses corrected for heterogeneity across studies and convergent with results from rigorous thematic analysis.
- Results from meta-analyses were based on observational studies and slightly weakened or inconclusive for some patient factors. Small number of qualitative studies reviewed also limits the applicability of our findings to encourage better adherence to clinical practice guideline recommendations.
- Findings might have limited applicability in settings not reviewed, especially in developing countries.

## INTRODUCTION

Obesity rates have nearly tripled in most countries since 1975.[1] The rising health problems attributable to obesity are undoubtedly challenging health systems worldwide.[2] As the first point of contact for most people seeking health care services, general practice or primary care ('clinical practice') remains at the forefront of efforts to prevent and manage obesity.[2] Although a range of evidence-based guidelines provide recommendations on how to provide effective weight management in clinical practice,[3] obesity and related complications remain under diagnosed and poorly treated.[4 5] Quality improvements in obesity care would result in significant population health and economic benefits.[6-9]

Most international guidelines recommend that Body Mass Index (BMI) should be used as a routine measure for diagnosis.[3 10] They also recommend that Waist Circumference (WC) should be considered as an additional measure to assess the risk of developing obesity related complications. [3] There is a growing body of evidence indicating that routine clinical practices for obesity related anthropometric measures fall short of guideline recommendations and standards.[2] Studies have reported that the rate of weight, BMI, or WC

1 measurement in clinical practice could be as low as 20 to 30%, even in high-income countries.[11 12] The  
2 reasons for such low adherence rates to these guideline recommendations are likely to vary across countries.  
3  
4 For instance, patient factors such as female sex was associated with an increased likelihood of weight  
5 recording in the United Kingdom (UK)[11] but not in the Netherlands,[13] and was associated with a  
6  
7 decreased likelihood of BMI documentation in Australia.[12] Cardiovascular disease was associated with an  
8  
9 increased likelihood of a weight recording in the Netherlands,[13] whereas a reverse association was reported  
10  
11 in Australia.[12] Furthermore, qualitative research suggests that health care professionals report several  
12  
13 barriers to implementing obesity related anthropometric measure in clinical practice such as lack of knowledge  
14  
15 and specific training, negative perceptions about its usefulness, clinical importance, and acceptability.[14]  
16  
17 Given the existence of relevant quantitative and qualitative studies, as well as several inconsistencies within  
18  
19 this evidence base, this mixed methods systematic review aims to improve our knowledge of the enablers and  
20  
21 barriers to implementing obesity assessments in clinical practice.  
22  
23  
24  
25  
26  
27  
28  
29

## 30 **METHODS**

### 31 **Protocol and registration**

32 We developed the protocol for this systematic review with guidance from previous research,[15-17] the Centre  
33  
34 for Review and Dissemination's Guidance for undertaking reviews in health care,[18] the JBI methodology  
35  
36 for mixed methods systematic reviews using a convergent integrated approach to synthesis and  
37  
38 integration,[19] and the Preferred Reporting Items for Systematic Review and Meta-Analysis Protocols  
39  
40 statement.[20]  
41  
42  
43  
44  
45  
46  
47  
48

### 49 **Patient and public involvement**

50 This rapid systematic review did not involve patients and the public in the protocol development.  
51  
52  
53  
54

### 55 **Eligibility**

56 Using modified versions of the Population, Interventions, Comparators, and Outcomes (PICO) framework,  
57  
58 we developed two research questions and selected study eligibility criteria (Table 1).[21]  
59  
60

**Table 1: Inclusion criteria for quantitative and qualitative studies.**

| Parameter                   | Criteria                                 |                                                                                                                                                                                                                                                                                                                                                                                                             |
|-----------------------------|------------------------------------------|-------------------------------------------------------------------------------------------------------------------------------------------------------------------------------------------------------------------------------------------------------------------------------------------------------------------------------------------------------------------------------------------------------------|
| <b>Quantitative studies</b> |                                          |                                                                                                                                                                                                                                                                                                                                                                                                             |
| <b>P</b>                    | Population and setting                   | Adult patients in clinical practice (general practice or primary care)                                                                                                                                                                                                                                                                                                                                      |
| <b>P</b>                    | Patient factor<br>(independent variable) | Patient factors associated with implementing obesity related anthropometric assessments such as previous obesity related anthropometric assessment (e.g., weight, waist circumference, and BMI); demographic characteristics (e.g., age, sex, and ethnicity); existing medical conditions (e.g., type 2 diabetes, hypertension, and hyperlipidaemia); and clinical encounter (e.g., reason for appointment) |
| <b>O</b>                    | Outcome (dependent variable)             | Obesity related anthropometric assessments (e.g., weight, BMI, waist circumference, and weight-to-hip ratio)                                                                                                                                                                                                                                                                                                |
| <b>Qualitative studies</b>  |                                          |                                                                                                                                                                                                                                                                                                                                                                                                             |
| <b>P</b>                    | Population and setting                   | Health care professionals in clinical practice (general practice or primary care)                                                                                                                                                                                                                                                                                                                           |
| <b>I</b>                    | Interest                                 | Health care professionals' views (perspectives, or experiences) about implementing obesity related anthropometric assessments in clinical practice                                                                                                                                                                                                                                                          |
| <b>Co</b>                   | Context                                  | Any country worldwide                                                                                                                                                                                                                                                                                                                                                                                       |

### 1. Quantitative research question

What are the patient factors associated with implementing obesity related anthropometric assessments in clinical practice?

### 2. Qualitative research question

1 What are the views of health care professionals about implementing obesity related anthropometric  
2 assessments in clinical practice?  
3  
4  
5  
6

7 To answer the quantitative research question, we considered observational studies (e.g., cohort, cross-  
8 sectional, case-control, and case series) that reported associations between patient factors (independent  
9 variables) and outcomes (dependent variables) in the clinical practice setting (general practice or primary  
10 care). For the qualitative research question, we considered qualitative studies that reported on the views of  
11 health care professionals about enablers and barriers to implementing obesity related anthropometric  
12 assessments in the clinical practice setting. We considered qualitative studies using designs such as  
13 phenomenological, ethnographic, grounded theory, historical, case study, and action research.  
14  
15  
16  
17  
18  
19  
20  
21  
22  
23  
24

### 25 **Search strategy, information sources, and study selection**

26 The academic Liaison Librarian (BC) developed our search strategy in consultation with the subject expert  
27 (EA). She searched Medline, Embase, and CINAHL databases for potentially relevant articles on 25<sup>th</sup>  
28 September 2021. Due to a typographical error for one search term used in Embase, she repeated the search in  
29 that database on 25<sup>th</sup> November 2021. The mixed methods, quantitative, and qualitative search string was  
30 adapted from the OVID expert search tool 'Mixed Methods' (Supplementary Table S1). All records identified  
31 were exported from the databases into EndNote 20 reference manager and duplicate records were removed  
32 where possible. All titles and abstracts were first screened for eligibility against the criteria mentioned above.  
33  
34 Second, the available full-length reports retrieved from these records were screened for possible inclusion.  
35  
36 We considered studies published in English language without any restrictions on the publication date and  
37 geographical location. References from included studies were also searched. Reasons why studies identified  
38 in the second screen were excluded are available in the Supplementary (Supplementary Table S2).  
39  
40  
41  
42  
43  
44  
45  
46  
47  
48  
49  
50  
51  
52  
53  
54

### 55 **Data extraction and risk of bias assessment**

56 We independently extracted key characteristics and assessed the risk of bias of the quantitative (RC, CNS,  
57 DL, and EA) and qualitative (KP, GM, and EA) studies included for review using the JBI's standardized  
58  
59  
60

critical appraisal checklists.[22] We used this information to assist our discussion on the strength of the body of evidence following our synthesis of results. For quantitative studies, we sought information about study details, population and setting, patient factors (independent variables), outcomes (obesity related anthropometric assessments), statistical methods, results/effect estimates, and author's conclusions. For qualitative studies, we sought information about study details, population and setting, study design, aims and methods, main themes and subthemes with explanations, and author's conclusions.

### **Effect measures**

Results for categorical predictor variables, where the effect was expressed as a ratio relative to a reference category accompanied by a 95% Confidence Interval (CI), were considered for pooling. These results comprised Risk Ratios (RRs), rate ratios, and Odds Ratios (ORs) with no hazard ratios reported. Results which were only reported as frequency counts were converted to RRs and associated 95% CIs using an appropriate online calculator via the VassarStats website.[23]

### **Synthesis methods**

To allow pooling of results, we expressed ratios relative to the same or a similar reference category. Where reference categories were swapped (for example, females defined as the reference category instead of males), we corrected the reference category by inverting the ratio (and associated 95% CI) around the null value of '1'. Where a numeric variable had been categorised into varying categories, the lowest category was taken as the reference category and the highest category compared to it. Where there was a common reference category but varied comparator categories, the comparator categories were combined using the method by Borenstein and colleagues.[24] For example, for the variable 'race/ethnicity', as 'White' was the common reference category, the results for the various non-White categories were re-combined to produce a single 'non-White' to 'White' ratio. Where a single study presented results separately in independent subgroups (such as separate results for males and females), ratios were first combined using a fixed effects meta-analysis prior to being pooled with results from other studies. Once reference categories, comparator categories, and subgroups had been corrected, random-effects meta-analysis was used to pool ratios for predictors reported in three or more



1 studies. To correct for heterogeneity across studies, we applied heterogeneous specific inverse variance  
2 weights in these analyses.[25] Meta-analysis was only conducted for the BMI assessment outcome as ‘BMI  
3 recording’ or ‘BMI diagnosis recording’, which was more commonly reported than alternatives such as WC.  
4  
5 Results reported include the pooled ratio with associated 95% CI and p-value and the  $I^2$  statistic and the p-  
6  
7 value from the heterogeneity test. Forest plots are used to present commonly reported predictors, while results  
8  
9 for other predictors are tabulated.  
10  
11  
12

13  
14  
15  
16 We used subgroup analyses to explore possible explanations for heterogeneity. This included assessing  
17  
18 candidate grouping variables related to what was measured, how the results were summarised, and where the  
19  
20 studies were conducted. Firstly, studies were stratified according to whether the outcome was the recording  
21  
22 of BMI assessment or the recording of BMI as a health diagnosis. Secondly, as ORs generally overestimate  
23  
24 RRs, studies could be stratified according to whether ORs or RRs were presented. Finally, as we assumed that  
25  
26 different countries have different health care systems and policies, studies were stratified according to country  
27  
28 (UK, United States [US], Australia or ‘Other’). Subgroup analyses proceeded when at least two categories of  
29  
30 the grouping variable contained at least three studies each. Sensitivity analyses, excluding all studies which  
31  
32 failed to achieve 100% ‘yes’ responses on the quality assessment checklist, were conducted to check whether  
33  
34 any of the findings were sensitive to study quality.  
35  
36  
37  
38  
39  
40

### 41 **Reporting bias assessment**

42  
43  
44 Funnel plots were visually reviewed for indications of reporting bias and Egger’s tests were reported for meta-  
45  
46 analyses containing 10 or more studies only, as recommended in the Cochrane Handbook for Systematic  
47  
48 Reviews of Interventions (section 13.3.5.4 Tests for funnel plot asymmetry).[26]  
49  
50

### 51 **Thematic analysis**

52  
53  
54 We applied the widely used reflexive thematic analysis method by Braun and Clarke to establish findings  
55  
56 from the qualitative data.[27] Studies were read several times by two authors (GM and KP). Each author  
57  
58 extracted the main findings from individual studies. Further, as recommended,[27] we spent time individually  
59  
60

1 coding to construct categories from the data. The categories were reviewed to seek potential commonalities  
2 and differences between the papers, from which themes were established. The two authors met regularly to  
3 review areas of data extraction, coding allocation, and theme creation. Ongoing reflexive discussions created  
4 a space for mutual understanding and agreement about the overarching themes.  
5  
6  
7  
8  
9

## 11 RESULTS

### 14 Study selection

16 A flow diagram of the study selection process appears below (Fig. 1). Our search strategy identified 3,784  
17 records including four additional studies from other sources after 1,867 duplicates were removed. Of these,  
18 we excluded 3,680 records after the first screening, leaving 104 records for a second screening. After further  
19 assessment of 87 reports retrieved, we excluded 62 additional records for reasons summarized below and  
20 described in the Supplementary (Supplementary Table S2).  
21  
22  
23  
24  
25  
26  
27  
28  
29

30 <<Figure 1>>  
31  
32  
33  
34

### 35 Study characteristics

37 We present a detailed summary of the study characteristics in the Supplementary (Supplementary Tables S3  
38 and S4). In total, there were 22 quantitative studies (observational)[11-13 28-46] and three qualitative  
39 studies,[14 47 48] published between 2004 and 2020. Eight studies were from the UK,[11 14 37 39 40 43 46  
40 47] nine from the US,[28 31 32 34 36 41 42 45 48] four from Australia,[12 33 35 44] and one each from  
41 Germany,[38] Spain,[30] Israel,[29] and the Netherlands.[13] All three qualitative studies included interviews  
42 with 7 to 14 primary care practitioners.[14 47 48] All qualitative studies conducted semi-structured interviews  
43 and thematic analysis to explore health care professionals' views towards WC measurement including  
44 identification of possible barriers to carrying out the assessment,[14] primary care providers' perception of  
45 WC measurement rejection in primary care,[48] and primary care providers' perception of recognition of  
46 overweight and obesity.[47] Quantitative studies were based on records of patients from primary practices,  
47 with sample sizes between 100 and 1000 in three studies,[28-30] 1000 and 10,000 in six studies,[13 31-35]  
48  
49  
50  
51  
52  
53  
54  
55  
56  
57  
58  
59  
60

10,000 and 100,000 in six studies,[36-41] and greater than 100,000 in seven studies.[11 12 42-46] The patient factors associated with the implementation of obesity related anthropometric assessment in primary care varied between studies, with sociodemographic factors such as age and sex identified in 16 studies,[11-13 28 31 32 34 35 37-39 41-45] ethnicity and/or race identified in nine studies,[11 28 31 32 34 39 41 42 45] and socioeconomic status identified in four studies.[11 37 39 43] Presence of co-morbidities or any specific medical condition was identified to be a patient factor independently associated with the obesity assessment in 20 studies.[11-13 28-35 38-46] Six studies identified insurance type as a factor associated with obesity related anthropometric assessment.[31 32 34-36 41 42] Outcomes in studies varied, with 11 studies having BMI “measurements” or “recording” or “documentation” or “screening”, [12 29 30 36 37 39-42 44 46] four studies having obesity “diagnosis” or “recognition” or “identification”, [28 31 38 40] two studies having weight “recording” or “measurement”, [11 13] two studies having overweight/obesity “documentation”, [32 34] and one study each for null BMI recording, [43] weight and/or WC measurement, [33] ICD-9 codes for overweight/obesity, [45] and non-identification of overweight and obesity [35] as a dependent variable.

### **Risk of bias within studies**

We present the results of our quality assessment of each study in the Supplementary (Supplementary Table S5). All four cohort studies had at least 70% of the quality items clearly met, [11 37 40 46] with three studies having one to two items unclear. [11 40 46] Of the 18 cross-sectional studies, 12 studies had 100% of the quality items clearly met, [12 13 29 31-34 39 42-45] and six studies had at least 50% of the quality items clearly met, [28 30 35 36 38 41] with four studies having one to two items unclear. [28 30 35 38] Of the three qualitative studies, two studies had 70%, [14 47] and one study had 80% [48] of the quality items clearly met.

### **Findings of meta-analysis**

All patient factors potentially associated with obesity assessments as predictors were considered in each quantitative study reviewed (Supplementary Table S3). Meta-analyses were conducted on each of the fourteen potential predictors identified which were reported in at least three studies each (Table 2). These were grouped as demographic characteristics (age, sex, race/ethnicity, deprivation index, and health insurance status), BMI

category, smoking status, and comorbidities (number of comorbidities and individual comorbidities such as cardiovascular disease and diabetes). All except one study[40] contributed results to at least one of these predictors. All meta-analyses found very high heterogeneity between studies. More detailed descriptions appear below, and additional results are presented in the Supplementary (Supplementary Section S6).

**Table 2: Summary of meta-analyses which pooled the ratios of BMI assessment by patient groups.**

| Predictor               | Comparison                                              | No. of studies | Pooled risk ratio | I <sup>2</sup> , heterogeneity test p-value |
|-------------------------|---------------------------------------------------------|----------------|-------------------|---------------------------------------------|
| <b>Demographics</b>     |                                                         |                |                   |                                             |
| Sex                     | Female vs. male (reference)                             | 15             | 1.28 (1.10,1.50)  | 99.8%, p<0.001                              |
| Age                     | Closest to 65 years vs. closest to 30 years (reference) | 12             | 0.90 (0.50,1.63)  | 100%, p<0.001                               |
| Race/ethnicity          | Non-White vs. White (reference)                         | 9              | 1.27 (1.03,1.57)  | 99.6%, p<0.001                              |
| Deprivation index       | Highest deprivation vs. least (reference)               | 4              | 1.21 (1.18,1.24)  | 73.9%, p=0.009                              |
| <b>BMI category</b>     |                                                         |                |                   |                                             |
| BMI category            | Highest BMI vs. lowest BMI (reference)                  | 8              | 1.55 (0.99,2.45)  | 99.6%, p<0.001                              |
| Smoking status          | Current smoker vs. never smoker (reference)             | 3              | 1.01 (0.90,1.14)  | 98.3%, p<0.001                              |
| <b>Comorbidities</b>    |                                                         |                |                   |                                             |
| Number of comorbidities | Most vs. fewest (reference)                             | 10             | 2.11 (1.60,2.79)  | 99.6%, p<0.001                              |
| Cardiovascular disease  | Present vs. absent (reference)                          | 7              | 0.94 (0.81,1.10)  | 98.0%, p<0.001                              |
| Diabetes                | Present vs. absent (reference)                          | 9              | 1.19 (0.93,1.52)  | 99.0%, p<0.001                              |
| Dyslipidaemia           | Present vs. absent (reference)                          | 6              | 1.12 (0.92,1.37)  | 99.5%, p<0.001                              |
| Hypertension            | Present vs. absent (reference)                          | 10             | 1.17 (0.98,1.40)  | 99.5%, p<0.001                              |
| Mental illness          | Present vs. absent (reference)                          | 3              | 1.16 (0.79,1.70)  | 99.6%, p<0.001                              |
| Depression              | Present vs. absent (reference)                          | 3              | 1.22 (0.85,1.74)  | 98.7%, p<0.001                              |

## Demographics

Despite the high levels of heterogeneity between studies, the pooled results suggested that female sex, non-White race/ethnicity, and socio-economic deprivation were associated with statistically significant increases in the rate of BMI assessment of 1.2- to 1.3-fold, and there was no statistically significant evidence of reporting bias (Supplementary Section S6.1-3). There was no evidence of such differences in BMI assessment rates between younger and older age groups.

1 There was statistically significant evidence of increased assessment of BMI among females among studies  
2 from the UK and US but not Australia (Fig. 2). As would be expected, the pooled OR (11 studies, OR 1.45,  
3 95% CI 1.21,1.74,  $I^2$  99.5%) were higher than pooled other risk ratios (four studies, RR 1.18, 95% CI  
4 1.04,1.35,  $I^2$  99.7%) (Supplementary Section S6, Table S6.1). For all other predictors, there were insufficient  
5 studies reporting other risk ratios to allow further investigation of these subgroups. No other statistically  
6 significant results arose during the subgroup analysis.  
7  
8  
9  
10  
11  
12

13  
14  
15  
16 <<Figure 2>>  
17  
18  
19  
20

21 In sensitivity analysis, restricting analysis to studies with the highest quality ratings yielded an increased  
22 pooled RR (10 studies, RR 1.45, 95% CI 1.21,1.74,  $I^2$  99.6%) for sex, but did not alleviate the heterogeneity  
23 between studies. The equivalent sensitivity analysis for age category also increased the size of the effect  
24 estimate, although still not statistically significant (nine studies, RR 0.69, 95% CI 0.19,2.48,  $I^2$  100%).  
25  
26  
27  
28  
29  
30  
31

### 32 **BMI and smoking status**

33 All eight studies reporting results for BMI category found statistically significant effects, but the high  
34 heterogeneity yielded a wide CI and lack of statistical significance for the pooled RR (Fig. 3). Sensitivity  
35 analysis using only the studies with the highest quality rating produced a larger effect estimate for the  
36 difference between BMI assessment in the higher and lower BMI groups, but the high heterogeneity and lack  
37 of statistical significance remained (four studies, RR 2.56, 95% CI 0.45,14.6,  $I^2$  99.3%) (Supplementary  
38 Section S6, Table S6.6). There was no evidence of difference in BMI assessment between current and never  
39 smokers (three studies, RR 1.01, 95% CI 0.90,1.14,  $I^2$  98.2%) (Supplementary Section S6, Table S6.7).  
40  
41  
42  
43  
44  
45  
46  
47  
48  
49  
50  
51

52  
53 <<Figure 3>>  
54  
55  
56  
57

### 58 **Comorbidities**

1 Despite considerable heterogeneity in measures, methods, and outcomes (Supplementary Section S6, Table  
2 S6.8), all 10 studies found that those with the higher comorbidities were more likely to have a BMI assessment  
3 recorded, with these results being statistically significant in nine of the 10 studies (Fig. 4). Subgroup and  
4 sensitivity analyses showed that this association was broadly consistent across outcomes, countries, and study  
5 quality, with no visual or statistical evidence of publication bias (Supplementary Section S6, Table S6.8).  
6  
7  
8  
9

10  
11  
12  
13  
14 <<Figure 4>>  
15  
16  
17

18 Pooled ratio of BMI assessment for those with relative to those without each specific comorbidity produced  
19 quite uniform results (Supplementary Section S6, Table S6.8). None of the individual comorbidities had a  
20 statistically significant association with BMI assessment and all displayed very high heterogeneity between  
21 studies: cardiovascular disease (seven studies, RR 0.94, 95% CI 0.81,1.10, I<sup>2</sup> 98.0%), diabetes (nine studies,  
22 RR 1.19, 95% CI 0.93,1.51, I<sup>2</sup> 99.0%), dyslipidaemia (six studies, RR 1.12, 95% CI 0.92,1.37, I<sup>2</sup> 99.5%),  
23 hypertension (10 studies, RR 1.17, 95% CI 0.98,1.40, I<sup>2</sup> 99.5%), mental illness (three studies, RR 1.16, 95%  
24 CI 0.79,1.70, I<sup>2</sup> 99.6%), and depression (three studies, RR 1.22, 95% CI 0.85,1.74, I<sup>2</sup> 98.7%). However,  
25 subgroup analyses found that studies from Australia, unlike those from the UK and US, had statistically  
26 significantly higher BMI assessment for those with comorbidities with lower heterogeneity: diabetes (three  
27 studies, RR 1.84, 95% CI 1.75,1.93, I<sup>2</sup> 0%); dyslipidaemia (three studies, RR 1.21, 95% CI 1.08,1.36, I<sup>2</sup>  
28 80.6%); and hypertension (three studies, RR 1.15, 95% CI 1.05,1.26, I<sup>2</sup> 69.4%). Sensitivity analyses,  
29 restricting pooling to studies with the higher quality ratings, gave statistically significant evidence of the  
30 association between the comorbidity and BMI assessment in dyslipidaemia (four studies, RR 1.21, 95% CI  
31 1.15,1.28, I<sup>2</sup> 57.3%) and hypertension (eight studies, RR 1.26, 95% CI 1.10,1.43, I<sup>2</sup> 97.7%).  
32  
33  
34  
35  
36  
37  
38  
39  
40  
41  
42  
43  
44  
45  
46  
47  
48  
49  
50  
51  
52

### 53 Findings of thematic analysis

54 Three themes were established from our thematic analysis of the qualitative studies: *personnel, resources,*  
55 *and systemic factors.*  
56  
57  
58  
59  
60

## Personnel

The theme of *personnel* factors focused on two sub-themes: *roles and responsibilities* and *communications and discomfort*. While nurse participants believed that weight assessment and management was part of their professional role, there was ambiguity about this among the medical participants. One General Practitioner (GP) noted “*I don’t want to be weighing people every week. I don’t think that’s my role. I think it’s also not a good use of our expertise as generalist doctors. I think we’ve got other things that we could be doing*”, [47] (p. 7). There were variable views among GPs about their role in obesity prevention. The GPs asserted that patients should retain responsibility for their weight unless they have weight related health issues: “*Patients need to take some responsibility themselves. And if they know that they’re carrying a bit of extra weight, they don’t need to see a GP necessarily*”, [47] (p. 7): “*I have a responsibility to make them aware that (their weight) is an issue where it’s clearly impacting on their (health). Do I have a responsibility to assist them with that? If they are looking for that assistance. I would have a responsibility to assist them or signpost them to what can assist them*”, [47] (p. 7). This finding was aligned with another study which found that weight related measurements were only undertaken if part of routine practice. [48] Although GPs and nurses perceived that patients lacked understanding of the health risks associated with increasing waist size, and that WC measurement could motivate patients to make healthy lifestyle changes, they did not routinely carry out this assessment. [14]

Our thematic analysis highlighted a second sub-theme in relation to *personnel factors* namely: *communications and discomfort*. Primary care practitioners perceived that patients might feel uncomfortable or embarrassed about having their WC measured. [14] Others expressed a preference for discussing weight with the patient within the context of existing, and possibly weight related, health issues: [47] “*So, I have to say that I tend only to (raise weight for discussion) if I see it as relevant to the problem that they’ve got*”, [47] (p. 7). They also thought that measuring waist might cause patient discomfort, particularly given the intimate nature of WC measurements, [14 48] as a practice nurse highlighted: “*It’s personal to go up and start putting your arms around a patient*”, [14] (p. 365). The need to consider cultural sensitivities was also reported: “*Depends on the individual circumstances. Some patients don’t care, but if you’re a Muslim woman and very*

1 strict about it you wouldn't want anybody other than a woman touching you, so it depends on your individual  
2 ethnic preferences and your personal preferences as well",[14] (p. 368). This was further reinforced when  
3 primary care providers reported their own discomfort when measuring a person's WC, more so, a person of a  
4 different gender to themselves: "five providers shared that obtaining a WCM (abbreviated for WC  
5 measurement) was "uncomfortable," particularly if the patient was "large" and/or the opposite gender of the  
6 provider",[48] (p. 686).

## 16 Resources

17 The theme of *resources* included sub-themes associated with *time, equipment, costs, knowledge and training*.  
18 All three qualitative studies referred to the challenges of time for appointments and consultations. One health  
19 care practitioner stated: "You don't just take the measurement, you have to explain what it means so in itself  
20 it doesn't take a moment does it, but then you've got quite a good length of topic of conversation to explain  
21 it",[14] (p. 368). Limited availability of equipment such as tape measures[48] and lack of specific training on  
22 correct measuring technique[14] were other barriers to primary care practitioners for undertaking WC  
23 measurements. However, it was noted that "the degree to which HCPs (abbreviated for health care  
24 professionals) felt comfortable about WCM appeared to be positively related to the increased experience of  
25 measuring waist size and to routine rather than ad hoc use of this measurement and negatively associated  
26 with patients being overweight or obese",[14] (p. 369), despite health care professionals noting that they had  
27 not received specific training related to implementing WC measurements.[14] An additional barrier to obesity  
28 related anthropometric assessments could be that primary care practitioners question the evidence-base for  
29 recommended weight management interventions by clinical guidelines: "If someone's got obesity, I'm kind of  
30 stuck. I can give them advice on what to do but I don't feel in many cases, that's terribly helpful or terribly  
31 effective",[47] (p. 7).

## 55 Systemic factors

56 Two studies found *systemic factors* as barriers to undertaking WC measurements.[14 47] One study  
57 highlighted the limited human and financial resources offered to primary care services.[47] Another referred



1 to the need for greater organisational incentives for undertaking WC measurements.[14] Similarly, one  
2 primary care practitioner noted that the National Health Service contracts in the UK did not “*prioritise or*  
3 *incentivise*” weight management within primary care settings.[47] However, finance related issues were not  
4  
5 the only systemic factors highlighted. There were concerns about restrictive eligibility criteria for referring to  
6  
7 specialised weight management services as summarised: “*There was despondency among PCPs (abbreviated*  
8 *for primary care practitioners) that they had nowhere to refer overweight patients when weight was not (yet)*  
9 *impacting on their health, and even when patients had clinical weight issues, they were not eligible for some*  
10 *specialist care*”,[47] (p. 6). While findings were mainly related to service level issues, primary care  
11  
12 practitioners argued that the inclusion of WC measurement within both quality and outcome frameworks could  
13  
14 incentivize clinical practice.[14]  
15  
16  
17  
18  
19  
20  
21  
22  
23  
24

## 25 **DISCUSSION**

26 We are the first authors to have systematically reviewed, synthesized, and integrated the published evidence  
27  
28 from quantitative and qualitative studies on the enablers and barriers to implementing obesity related  
29  
30 anthropometric assessments in clinical practice. Our evidence synthesis revealed several important enablers  
31  
32 and barriers to obesity assessments that could inform health care professionals and relevant stakeholders such  
33  
34 as academic institutions, professional bodies, and regulatory agencies.  
35  
36  
37  
38  
39  
40  
41

### 42 **Enablers**

43 We found evidence from our meta-analysis indicating that an obesity assessment is most likely for patients  
44  
45 with weight related complications (‘comorbidities’). This finding was broadly consistent across countries and  
46  
47 slightly strengthened among high quality studies (including for ‘dyslipidaemia’ and ‘hypertension’).  
48  
49 Similarly, the presence of ‘obesity-related comorbidities’ is reportedly one of the principal reasons cited by  
50  
51 health care professionals for initiating weight management discussions [49]. Although highly variable, we  
52  
53 also found evidence to suggest that BMI assessment (‘recording’) was most likely among patients with the  
54  
55 highest BMI. Overall, the results of our meta-analyses suggest that both excess weight and weight related  
56  
57 complications encourage health care professionals to conduct obesity assessments in high-risk patients.  
58  
59  
60

1  
2  
3 Convergent with this hypothesis, the findings of our thematic analysis revealed positive views among health  
4 care professionals about obesity assessments if they suspected that their patient's excess weight was negatively  
5 impacting on their health.[47] Health care professionals also expressed positive views about obesity  
6 assessments if part of routine practice,[48] and because they could motivate patients to make healthy lifestyle  
7 changes.[14] Indeed, frequent self-weighing is associated with favourable weight loss, particularly among  
8 those with excess weight.[50] This is consistent with findings of a recent systematic review of qualitative  
9 studies in which health care professionals expressed positive views on the usefulness of routine BMI  
10 assessment at every consultation alongside a treatment framework for discussing weight management with  
11 patients in primary care.[51] Health care professionals should consider focusing on the health benefits of  
12 obesity assessments for clinical diagnosis and monitoring in all patients with visible signs of obesity, as part  
13 of their routine practice.

14  
15  
16 Findings from our meta-analyses also revealed evidence that obesity assessment was most likely for patients  
17 with socio-economic deprivation in the UK, patients of 'non-White' race/ethnicity in the UK and US, and for  
18 female patients, particularly in the UK and US. These results are likely partially explained by increasing  
19 obesity[52] and higher clinical encounter rates with socio-economic disadvantage groupings,[53] health care  
20 professionals being more verbally dominant towards non-White than White patients,[54] and a higher  
21 prevalence of severe obesity among women than men,[55] respectively, in high income countries. Health care  
22 professionals should be aware of these potential biases to ensure that they conduct routine obesity assessments  
23 in all high-risk patients regardless of their socio-economic status, race/ethnicity, and sex.

## 50 **Barriers**

51  
52  
53 Our thematic analysis revealed negative attitudes among health care professionals about patients with obesity  
54 and their role in obesity assessment and weight management, generally. They expressed views that patients,  
55 rather than health care professionals, should retain responsibility for, and lacked motivation to, address their  
56 weight issues.[47] Health care professionals expressed doubts about their patients' understanding of health  
57  
58  
59  
60

1 risks associated with the results of obesity assessments.[14] Overall, these findings suggest that weight stigma  
2 among health care professionals is a barrier to obesity assessments.  
3  
4  
5

6  
7 We found evidence that health care professionals expressed negative views about adequate training and  
8 equipment for obesity assessments.[14 47 48] They expressed negative views on limited access to specialist  
9 weight management services and the evidence-base for treatments,[47] as required after an obesity assessment  
10 and diagnosis.[3] There were expressions of discomfort about obtaining obesity assessments for patients of  
11 the opposite sex,[48] which is consistent with previous research showing that patients often preferred to see a  
12 health care professional of the same-sex.[56] Convergent with findings from our meta-analyses for patients  
13 with weight related complications, health care professionals expressed apprehension to discuss weight in the  
14 absence of suspected health issues.[47] A recently validated brief diagnostic screening tool (EOSS-2 Risk  
15 Tool) for predicting weight related complications in patients with excess weight could provide health care  
16 professionals with a structured framework for further investigations including obesity assessments.[57]  
17 Finally, health care professionals expressed lack of time,[14 47 48] increased financial cost implications,[14]  
18 and lack of incentives in the health system[14 47] as additional resource and systematic barriers to obesity  
19 assessment. Collectively, these findings strengthen the urgency for implementing recommendations to  
20 incorporate “formal teaching on the causes, mechanisms, and treatments of obesity” into standard curricula  
21 for health care professionals by academic institutions, professional bodies, and regulatory agencies.[58] It  
22 would encourage better adherence to clinical practice guideline recommendations that BMI and WC  
23 measurements should be used for routine diagnosis and monitoring.[3 10]  
24  
25  
26  
27  
28  
29  
30  
31  
32  
33  
34  
35  
36  
37  
38  
39  
40  
41  
42  
43  
44  
45  
46  
47

## 48 **Limitations**

49  
50  
51 The applicability of our findings to encourage better adherence to clinical practice guideline recommendations  
52 is limited because results from meta-analyses were based on observational studies and slightly weakened or  
53 inconclusive for some patient factors, whereas only a small number of qualitative studies were reviewed. As  
54 the studies reviewed were predominately from the UK and US, our findings might have limited applicability  
55  
56  
57  
58  
59  
60

1 in other settings, especially in developing countries. Furthermore, we might have missed relevant studies for  
2 inclusion by using a streamlined rapid systematic review approach.  
3  
4  
5

## 6 **Conclusion**

7  
8  
9 The key findings of our mixed methods systematic review indicate that obesity related anthropometric  
10 assessment in clinical practice is positively associated weight related complications, socio-economic  
11 deprivation, 'non-White' race/ethnicity, and female sex among patients. Views of health care professionals  
12 were positive about obesity assessments when linked to patient health and if part of routine practice, but  
13 negative about their role, training, time, resources, and incentives in the health care system. To encourage  
14 better adherence to clinical practice guideline recommendations, high income countries should consider  
15 incorporating formal teaching of obesity medicine into their academic institutions, professional bodies, and  
16 regulatory agencies. Future research for developing and testing interventions should consider the enablers and  
17 barriers to obesity assessments identified in this study.  
18  
19  
20  
21  
22  
23  
24  
25  
26  
27  
28  
29  
30  
31

## 32 **Competing Interests**

33  
34 EA was the Founding President, and now serves as the Secretary, of the National Association of Clinical  
35 Obesity Services (NACOS). He has received honoraria from Novo Nordisk for speaking and participating at  
36 meetings. He has received unrestricted research funding from Novo Nordisk and iNova on behalf of NACOS.  
37 RC and CNS have received payments for their contributions through casual employment contracts at Western  
38 Sydney University. PF, KP, GM, BC, and DL declare no competing financial interests.  
39  
40  
41  
42  
43  
44  
45  
46  
47

## 48 **Funding**

49  
50 This pilot work was partially supported by grants from iNova Pharmaceuticals (Australia) Pty Ltd  
51 (<https://inovapharma.com/>), in partnership with the National Association of Clinical Obesity Services  
52 Incorporated (<https://www.nacos.org.au/>) and Western Sydney University  
53 (<https://www.westernsydney.edu.au/>) (P00026836). The funders had no role in study design, data collection  
54 and analysis, decision to publish, or preparation of the manuscript.  
55  
56  
57  
58  
59  
60

**Author Contributions:**

EA and RC were responsible for designing the review protocol, writing the protocol and report, conducting the search, screening potentially eligible studies, extracting data, interpreting results, conducting risk of bias assessments, and updating reference lists. CNS was responsible for conducting the search, screening potentially eligible studies, extracting data, interpreting results, updating reference lists, and writing the Supplementary. KP and GM were responsible for designing the review thematic analysis protocol, screening potentially eligible studies, extracting qualitative data, interpreting results, and updating reference lists. BC was responsible for developing and conducting the search strategy. DL contributed to the design of the review protocol, writing the report, arbitrating potentially eligible studies, conducting risk of bias assessments, and interpreting results. PPF was responsible for the meta-analyses including extracting, analysing, writing, and interpreting the results from quantitative data, screening potentially eligible studies, and contributed to writing the results and Supplementary.

**Data Availability Statement:**

Not applicable.

**Registration and Protocol Statement:**

Our protocol had been submitted for registration in the International Prospective Register of Systematic Reviews, hosted by the Centre for Reviews and Dissemination (PROSPERO), but was deemed ineligible because we had already started extracting data before it was submitted (RECORD 301742). The submitted protocol to PROSPERO is available on request.

**Availability of Study Materials Statement:**

All materials used in this study such as templates for data extraction and risk of bias assessments are available on request.

**Ethics Approval Statement:**

Not applicable.

**References:**

1. World Health Organization. Obesity and overweight. Secondary Obesity and overweight 2021.  
<https://www.who.int/news-room/fact-sheets/detail/obesity-and-overweight>.
2. Wolfenden L, Ezzati M, Larijani B, Dietz W. The challenge for global health systems in preventing and managing obesity. *Obes Rev* 2019;**20 Suppl 2**:185-93 doi: 10.1111/obr.12872[published Online First: Epub Date]].
3. Semlitsch T, Stigler FL, Jeitler K, Horvath K, Siebenhofer A. Management of overweight and obesity in primary care-A systematic overview of international evidence-based guidelines. *Obes Rev* 2019;**20**(9):1218-30 doi: 10.1111/obr.12889[published Online First: Epub Date]].
4. Caterson ID, Alfadda AA, Auerbach P, Coutinho W, Cuevas A, Dicker D, Hughes C, Iwabu M, Kang J-H, Nawar R, Reynoso R, Rhee N, Rigas G, Salvador J, Sbraccia P, Vázquez-Velázquez V, Halford JCG. Gaps to bridge: Misalignment between perception, reality and actions in obesity. *Diabetes, Obesity and Metabolism* 2019;**21**(8):1914-24 doi: 10.1111/dom.13752[published Online First: Epub Date]].
5. Nordmo M, Danielsen YS, Nordmo M. The challenge of keeping it off, a descriptive systematic review of high-quality, follow-up studies of obesity treatments. *Obes Rev* 2020;**21**(1):e12949 doi: 10.1111/obr.12949[published Online First: Epub Date]].
6. Cefalu WT, Bray GA, Home PD, Garvey WT, Klein S, Pi-Sunyer FX, Hu FB, Raz I, Van Gaal L, Wolfe BM, Ryan DH. Advances in the Science, Treatment, and Prevention of the Disease of Obesity: Reflections From a Diabetes Care Editors' Expert Forum. *Diabetes Care* 2015;**38**(8):1567-82 doi: 10.2337/dc15-1081[published Online First: Epub Date]].
7. Bray GA, Fruhbeck G, Ryan DH, Wilding JP. Management of obesity. *Lancet* 2016;**387**(10031):1947-56 doi: 10.1016/S0140-6736(16)00271-3[published Online First: Epub Date]].

- 1 8. PwC. Weighing the cost of obesity: A case for action (2015). (accessed 5 August, 2022:  
2 <https://www.pwc.com.au/publications/healthcare-obesity.html>).  
3
- 4 9. Atlantis E, Kormas N, Samaras K, Fahey P, Sumithran P, Glastras S, Wittert G, Fusco K, Bishay R,  
5 Markovic T, Ding L, Williams K, Caterson I, Chikani V, Dugdale P, Dixon J. Clinical Obesity  
6 Services in Public Hospitals in Australia: a position statement based on expert consensus. *Clin Obes*  
7 2018;**8**(3):203-10 doi: 10.1111/cob.12249[published Online First: Epub Date]].  
8  
9  
10  
11  
12  
13
- 14 10. Ramachandran D, Atlantis E, Markovic T, Hocking S, Gill T. Standard baseline data collections in  
15 obesity management clinics: A Delphi study with recommendations from an expert panel. *Clin Obes*  
16 2019;**9**(3):e12301 doi: 10.1111/cob.12301[published Online First: Epub Date]].  
17  
18  
19  
20
- 21 11. Nicholson BD, Aveyard P, Bankhead CR, Hamilton W, Hobbs FDR, Lay-Flurrie S. Determinants and  
22 extent of weight recording in UK primary care: an analysis of 5 million adults' electronic health  
23 records from 2000 to 2017. *BMC Medicine* 2019;**17**(1):222-22 doi: 10.1186/s12916-019-1446-  
24 y[published Online First: Epub Date]].  
25  
26  
27  
28  
29
- 30 12. Turner LR, Harris MF, Mazza D. Obesity management in general practice: does current practice match  
31 guideline recommendations? *Medical Journal of Australia* 2015;**202**(7):370-72 doi:  
32 10.5694/mja14.00998[published Online First: Epub Date]].  
33  
34  
35  
36
- 37 13. Verberne LDM, Nielen MMJ, Leemrijse CJ, Verheij RA, Friele RD. Recording of weight in electronic  
38 health records: an observational study in general practice. *BMC Fam Pract* 2018;**19**(1):174 doi:  
39 10.1186/s12875-018-0863-x[published Online First: Epub Date]].  
40  
41  
42  
43
- 44 14. Dunkley AJ, Stone MA, Patel N, Davies MJ, Khunti K. Waist circumference measurement: knowledge,  
45 attitudes and barriers in patients and practitioners in a multi-ethnic population. *Family Practice*  
46 2009;**26**(5):365-71 doi: <https://dx.doi.org/10.1093/fampra/cmp048>[published Online First: Epub  
47 Date]].  
48  
49  
50  
51
- 52 15. Hong QN, Pluye P, Bujold M, Wassef M. Convergent and sequential synthesis designs: implications for  
53 conducting and reporting systematic reviews of qualitative and quantitative evidence. *Syst Rev*  
54 2017;**6**:61 doi: 10.1186/s13643-017-0454-2[published Online First: Epub Date]].  
55  
56  
57  
58  
59  
60

16. Noyes J, Booth A, Moore G, Flemming K, Tunçalp Ö, Shakibazadeh E. Synthesising quantitative and qualitative evidence to inform guidelines on complex interventions: clarifying the purposes, designs and outlining some methods. *BMJ Glob Health* 2019;4:e000893 doi: 10.1136/bmjgh-2018-000893[published Online First: Epub Date]].
17. Tricco AC, Antony J, Zarin W, Strifler L, Ghassemi M, Ivory J, Perrier L, Hutton B, Moher D, Straus SE. A scoping review of rapid review methods. *BMC Med* 2015;13:224 doi: 10.1186/s12916-015-0465-6[published Online First: Epub Date]].
18. University of York, Centre for Reviews Dissemination, Akers J. *Systematic Reviews: CRD's Guidance for Undertaking Reviews in Health Care*. Layerthorpe, York: Centre for Reviews and Dissemination, University of York, 2009.
19. Lizarondo L, Stern C, Carrier J, Godfrey C, Rieger K, Salmond S, Apostolo J, Kirkpatrick P, Loveday H. Chapter 8: Mixed Methods Systematic Reviews. In: Aromataris E, Munn Z, eds. *JBIManual for Evidence Synthesis*: JBI, 2020.
20. Moher D, Shamseer L, Clarke M, Ghersi D, Liberati A, Petticrew M, Shekelle P, Stewart LA. Preferred reporting items for systematic review and meta-analysis protocols (PRISMA-P) 2015 statement. *Syst Rev* 2015;4:1 doi: 10.1186/2046-4053-4-1[published Online First: Epub Date]].
21. Schardt C, Adams MB, Owens T, Keitz S, Fontelo P. Utilization of the PICO framework to improve searching PubMed for clinical questions. *BMC Med Inform Decis Mak* 2007;7:16 doi: 10.1186/1472-6947-7-16[published Online First: Epub Date]].
22. JBI. Critical Appraisal Checklist for Systematic Reviews and Research Syntheses. Secondary Critical Appraisal Checklist for Systematic Reviews and Research Syntheses 2020. <https://jbi.global/critical-appraisal-tools>.
23. 2001-2021 RL. VassarStats: Website for Statistical Computation. Secondary VassarStats: Website for Statistical Computation. <http://vassarstats.net/odds2x2.html>.
24. Borenstein M, Hedges LV, Higgins JPT, Rothstein HR. *Introduction to Meta-Analysis*: Wiley, 2021.



- 1 25. Doi SA, Barendregt JJ, Khan S, Thalib L, Williams GM. Advances in the meta-analysis of  
2 heterogeneous clinical trials I: The inverse variance heterogeneity model. *Contemp Clin Trials*  
3 2015;**45**(Pt A):130-8 doi: 10.1016/j.cct.2015.05.009[published Online First: Epub Date]].  
4  
5  
6  
7 26. *Cochrane Handbook for Systematic Reviews of Interventions*. In: Julian Higgins JT, ed. Version 6.2,  
8 2021 ed: Copyright © 2022 The Cochrane Collaboration, 2022.  
9  
10  
11 27. Braun V, Clarke V. Reflecting on reflexive thematic analysis. *Qualitative Research in Sport, Exercise*  
12 *and Health* 2019;**11**(4):589-97 doi: 10.1080/2159676X.2019.1628806[published Online First: Epub  
13 Date]].  
14  
15  
16  
17  
18 28. Ruser CB, Sanders L, Brescia GR, Talbot M, Hartman K, Vivieros K, Bravata DM. Identification and  
19 management of overweight and obesity by internal medicine residents. *Journal of General Internal*  
20 *Medicine* 2005;**20**(12):1139-41  
21  
22  
23  
24  
25 29. Melamed OC, Nakar S, Vinker S. Suboptimal identification of obesity by family physicians. *American*  
26 *Journal of Managed Care* 2009;**15**(9):619-24  
27  
28  
29  
30 30. Gutierrez Angulo ML, Amenabar Azurmendi MD, Cuesta Sole ML, Prieto Esteban I, Mancebo Martinez  
31 S, Iglesias Alonso A. Prevalence of obesity recorded in Primary Care. *Endocrinologia y Nutricion*  
32 2014;**61**(9):469-73 doi: <https://dx.doi.org/10.1016/j.endonu.2014.03.012>[published Online First:  
33 Epub Date]].  
34  
35  
36  
37  
38  
39 31. Bleich SN, Pickett-Blakely O, Cooper LA, Bleich SN, Pickett-Blakely O, Cooper LA. Physician practice  
40 patterns of obesity diagnosis and weight-related counseling. *Patient Education & Counseling*  
41 2011;**82**(1):123-29 doi: 10.1016/j.pec.2010.02.018[published Online First: Epub Date]].  
42  
43  
44  
45  
46 32. Cyr PR, Haskins AE, Holt C, Hanifi J. Weighty Problems: Predictors of Family Physicians Documenting  
47 Overweight and Obesity. *Family Medicine* 2016;**48**(3):217-21  
48  
49  
50  
51 33. Gonzalez-Chica DA, Bowden J, Miller C, Longo M, Nelson M, Reid C, Stocks N. Patient-reported GP  
52 health assessments rather than individual cardiovascular risk burden are associated with the  
53 engagement in lifestyle changes: population-based survey in South Australia. *BMC Family Practice*  
54 2019;**20**(1):1-10 doi: 10.1186/s12875-019-1066-9[published Online First: Epub Date]].  
55  
56  
57  
58  
59  
60

- 1  
2  
3  
4  
5  
6  
7  
8  
9  
10  
11  
12  
13  
14  
15  
16  
17  
18  
19  
20  
21  
22  
23  
24  
25  
26  
27  
28  
29  
30  
31  
32  
33  
34  
35  
36  
37  
38  
39  
40  
41  
42  
43  
44  
45  
46  
47  
48  
49  
50  
51  
52  
53  
54  
55  
56  
57  
58  
59  
60
34. Mattar A, Carlston D, Sariol G, Yu T, Almustafa A, Melton GB, Ahmed A. The prevalence of obesity documentation in Primary Care Electronic Medical Records. Are we acknowledging the problem? *Applied Clinical Informatics* 2017;**8**(1):67-79 doi: <https://dx.doi.org/10.4338/ACI-2016-07-RA-0115>[published Online First: Epub Date]].
35. Yoong SL, Carey ML, Sanson-Fisher RW, D'Este CA, Mackenzie L, Boyes A. A cross-sectional study examining Australian general practitioners' identification of overweight and obese patients. *JGIM: Journal of General Internal Medicine* 2014;**29**(2):328-34 doi: 10.1007/s11606-013-2637-4[published Online First: Epub Date]].
36. Aleem S, Lasky R, Brooks WB, Batsis JA. Obesity perceptions and documentation among primary care clinicians at a rural academic health center. *Obesity Research and Clinical Practice* 2015;**9**(4):408-15 doi: <http://dx.doi.org/10.1016/j.orep.2015.08.014>[published Online First: Epub Date]].
37. Booth HP, Prevost AT, Gulliford MC. Epidemiology of clinical body mass index recording in an obese population in primary care: a cohort study. *Journal of Public Health* 2013;**35**(1):67-74 doi: pubmed/fds063[published Online First: Epub Date]].
38. Bramlage P, Wittchen HU, Pittrow D, Kirch W, Krause P, Lehnert H, Unger T, Hofler M, Kupper B, Dahm S, Bohler S, Sharma AM. Recognition and management of overweight and obesity in primary care in Germany. *Int J Obes Relat Metab Disord* 2004;**28**(10):1299-308
39. Dalton ARH, Bottle A, Okoro C, Majeed A, Millett C. Implementation of the NHS Health Checks programme: baseline assessment of risk factor recording in an urban culturally diverse setting. *Fam Pract* 2011;**28**(1):34-40 doi: 10.1093/fampra/cm068[published Online First: Epub Date]].
40. Emanuel G, Charlton J, Ashworth M, Gulliford MC, Dregan A. Cardiovascular risk assessment and treatment in chronic inflammatory disorders in primary care. *Heart* 2016;**102**(24):1957-62 doi: <https://dx.doi.org/10.1136/heartjnl-2016-310111>[published Online First: Epub Date]].
41. Rose SA, Turchin A, Grant RW, Meigs JB. Documentation of body mass index and control of associated risk factors in a large primary care network. *BMC Health Services Research* 2009;**9**(1):236 doi: 10.1186/1472-6963-9-236[published Online First: Epub Date]].

- 1 42. Baer HJ, Karson AS, Soukup JR, Williams DH, Bates DW. Documentation and diagnosis of overweight  
2 and obesity in electronic health records of adult primary care patients. *JAMA Internal Medicine*  
3  
4 2013;**173**(17):1648-52 doi: 10.1001/jamainternmed.2013.7815[*published Online First: Epub Date*]].  
5  
6
- 7 43. Cuccu Z, Abi-Aad G, Duggal A. Characteristics of patients with body mass index recorded within the  
8  
9 Kent Integrated Dataset (KID). *BMJ health & care informatics* 2019;**26**(1) doi:  
10  
11 <http://dx.doi.org/10.1136/bmjhci-2019-000026>[*published Online First: Epub Date*]].  
12  
13
- 14 44. Ghosh A. Depressed, anxious and breathless missing out: Weight screening in general practice in a  
15  
16 regional catchment of New South Wales. *Australian Journal of Rural Health* 2016;**24**(4):246-52 doi:  
17  
18 10.1111/ajr.12264[*published Online First: Epub Date*]].  
19  
20
- 21 45. Mocarski M, Tian Y, Smolarz BG, McAna J, Crawford A. Use of International Classification of  
22  
23 Diseases, Ninth Revision Codes for Obesity: Trends in the United States from an Electronic Health  
24  
25 Record-Derived Database. *Population Health Management* 2018;**21**(3):222-30 doi:  
26  
27 <https://dx.doi.org/10.1089/pop.2017.0092>[*published Online First: Epub Date*]].  
28  
29
- 30 46. Osborn DPJ, Baio G, Walters K, Petersen I, Limburg H, Raine R, Nazareth I. Inequalities in the  
31  
32 provision of cardiovascular screening to people with severe mental illnesses in primary care Cohort  
33  
34 study in the United Kingdom THIN Primary Care Database 2000—2007. *Schizophrenia research*  
35  
36 2011;**129**(2-3):104-10 doi: 10.1016/j.schres.2011.04.003[*published Online First: Epub Date*]].  
37  
38
- 39 47. McHale CT, Laidlaw AH, Cecil JE. Primary care patient and practitioner views of weight and weight-  
40  
41 related discussion: a mixed-methods study. *BMJ Open* 2020;**10**(3):(no pagination) doi:  
42  
43 <https://dx.doi.org/10.1136/bmjopen-2019-034023>[*published Online First: Epub Date*]].  
44  
45
- 46 48. Gaynor B, Habermann B, Wright R. Waist Circumference Measurement Diffusion in Primary Care.  
47  
48 *Journal for nurse practitioners* 2018;**14**(9):683-88.e1 doi: 10.1016/j.nurpra.2018.06.002[*published*  
49  
50 *Online First: Epub Date*]].  
51  
52
- 53 49. Rigas G, Williams K, Sumithran P, Brown WA, Swinbourne J, Purcell K, Caterson ID. Delays in  
54  
55 healthcare consultations about obesity - Barriers and implications. *Obes Res Clin Pract*  
56  
57 2020;**14**(5):487-90 doi: 10.1016/j.orep.2020.08.003[*published Online First: Epub Date*]].  
58  
59  
60

- 1  
2  
3  
4  
5  
6  
7  
8  
9  
10  
11  
12  
13  
14  
15  
16  
17  
18  
19  
20  
21  
22  
23  
24  
25  
26  
27  
28  
29  
30  
31  
32  
33  
34  
35  
36  
37  
38  
39  
40  
41  
42  
43  
44  
45  
46  
47  
48  
49  
50  
51  
52  
53  
54  
55  
56  
57  
58  
59  
60
50. Vuorinen AL, Helander E, Pietila J, Korhonen I. Frequency of Self-Weighing and Weight Change: Cohort Study With 10,000 Smart Scale Users. *J Med Internet Res* 2021;**23**(6):e25529 doi: 10.2196/25529[published Online First: Epub Date]].
51. Warr W, Aveyard P, Albury C, Nicholson B, Tudor K, Hobbs R, Roberts N, Ziebland S. A systematic review and thematic synthesis of qualitative studies exploring GPs' and nurses' perspectives on discussing weight with patients with overweight and obesity in primary care. *Obesity Reviews* 2021;**22**(4): (no pagination) doi: <https://dx.doi.org/10.1111/obr.13151>[published Online First: Epub Date]].
52. Holmes J. Tackling obesity, 2021.
53. Gordon J, Valenti L, Bayram C, Miller GC. An analysis of general practice encounters by socioeconomic disadvantage. *Aust Fam Physician* 2016;**45**(10):702-05
54. Johnson RL, Roter D, Powe NR, Cooper LA. Patient race/ethnicity and quality of patient-physician communication during medical visits. *Am J Public Health* 2004;**94**(12):2084-90 doi: 10.2105/ajph.94.12.2084[published Online First: Epub Date]].
55. Hales CM, Carroll MD, Fryar CD, Ogden CL. Prevalence of Obesity and Severe Obesity Among Adults: United States, 2017-2018. *NCHS Data Brief* 2020(360):1-8
56. Fink M, Klein K, Sayers K, Valentino J, Leonardi C, Bronstone A, Wiseman PM, Dasa V. Objective Data Reveals Gender Preferences for Patients' Primary Care Physician. *J Prim Care Community Health* 2020;**11**:2150132720967221 doi: 10.1177/2150132720967221[published Online First: Epub Date]].
57. Atlantis E, John JR, Fahey PP, Hocking S, Peters K. Clinical usefulness of brief screening tool for activating weight management discussions in primary cARE (AWARE): A nationwide mixed methods pilot study. *PLoS One* 2021;**16**(10):e0259220 doi: 10.1371/journal.pone.0259220[published Online First: Epub Date]].
58. Rubino F, Puhl RM, Cummings DE, Eckel RH, Ryan DH, Mechanick JI, Nadglowski J, Ramos Salas X, Schauer PR, Twenefour D, Apovian CM, Aronne LJ, Batterham RL, Berthoud HR, Boza C, Busetto L, Dicker D, De Groot M, Eisenberg D, Flint SW, Huang TT, Kaplan LM, Kirwan JP, Korner J,

1 Kyle TK, Laferrere B, le Roux CW, McIver L, Mingrone G, Nece P, Reid TJ, Rogers AM,  
2 Rosenbaum M, Seeley RJ, Torres AJ, Dixon JB. Joint international consensus statement for ending  
3 stigma of obesity. Nat Med 2020;**26**(4):485-97 doi: 10.1038/s41591-020-0803-x[published Online  
4 First: Epub Date]].  
5  
6  
7  
8  
9  
10  
11

## 12 **Figure Legends:**

13  
14 **Figure 1: Flow diagram of the study selection process**

15  
16 **Figure 2: Forest plot of risk ratios for BMI assessment associated with female relative to male sex**  
17 **(reference) by country regions.**  
18

19  
20 **Figure 3: Forest plot of risk ratios for BMI assessment associated with highest relative to lowest**  
21 **(reference) BMI category.**  
22

23  
24 **Figure 4: Forest plot of risk ratios for BMI assessment associated with most relative to fewest (reference)**  
25 **number of comorbidities groups.**  
26  
27  
28  
29  
30  
31  
32  
33  
34  
35  
36  
37  
38  
39  
40  
41  
42  
43  
44  
45  
46  
47  
48  
49  
50  
51  
52  
53  
54  
55  
56  
57  
58  
59  
60

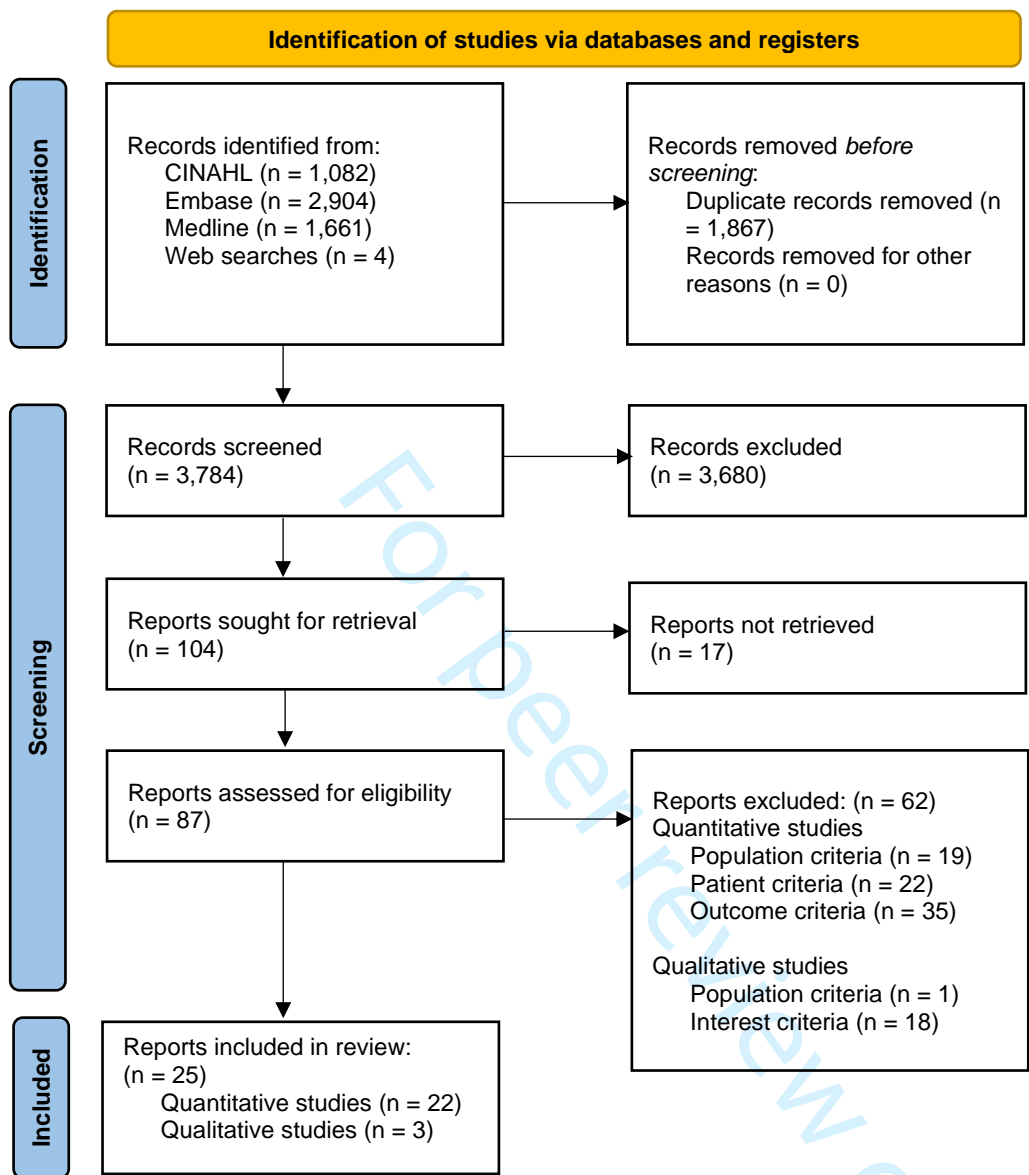

From: Page MJ, McKenzie JE, Bossuyt PM, Boutron I, Hoffmann TC, Mulrow CD, et al. The PRISMA 2020 statement: an updated guideline for reporting systematic reviews. *BMJ* 2021;372:n71. doi: 10.1136/bmj.n71

For more information, visit: <http://www.prisma-statement.org/>

1

2 **Author(s) and Year**

**Risk Ratio [95% CI]**

3  
4 **Australia**

5 Ghosh et al., 2016 1.01 [0.98, 1.04]

6 Turner et al., 2015 0.86 [0.78, 0.94]

7 Yoong et al., 2014 0.59 [0.38, 0.92]

8 Subgroup heterogeneity (Q = 15.6, df = 2, p < .001; I<sup>2</sup> = 87.2%) 0.99 [0.79, 1.25]

9  
10 **Other**

11 Bramlage et al., 2004 1.40 [1.30, 1.50]

12 Melamed et al., 2009 0.69 [0.51, 0.94]

13 Verberne et al., 2018 1.11 [0.91, 1.35]

14 Subgroup heterogeneity (Q = 22.7, df = 2, p < .001; I<sup>2</sup> = 91.2%) 1.32 [0.81, 2.16]

15 **UK**

16 Booth et al., 2012 1.14 [1.13, 1.15]

17 Cuccu et al., 2019 1.58 [1.57, 1.59]

18 Nicholson et al., 2019 1.30 [1.29, 1.31]

19 Subgroup heterogeneity (Q = 6914.9, df = 2, p < .001; I<sup>2</sup> = 100.0%) 1.27 [1.02, 1.60]

20  
21 **USA**

22 Baer et al., 2013 1.45 [1.42, 1.49]

23 Bleich et al., 2011 1.54 [1.14, 2.09]

24 Cyr et al., 2016 0.68 [0.58, 0.79]

25 Mattar et al., 2017 0.58 [0.37, 0.91]

26 MocarSKI et al., 2018 1.34 [1.33, 1.35]

27 Rose et al., 2009 1.27 [1.25, 1.29]

28 Subgroup heterogeneity (Q = 168.8, df = 5, p < .001; I<sup>2</sup> = 97.0%) 1.33 [1.20, 1.48]

29 All Studies heterogeneity (Q = 7603.0, df = 14, p < .001; I<sup>2</sup> = 99.8%) 1.28 [1.10, 1.50]

30

31

32

33

34

35

36

37

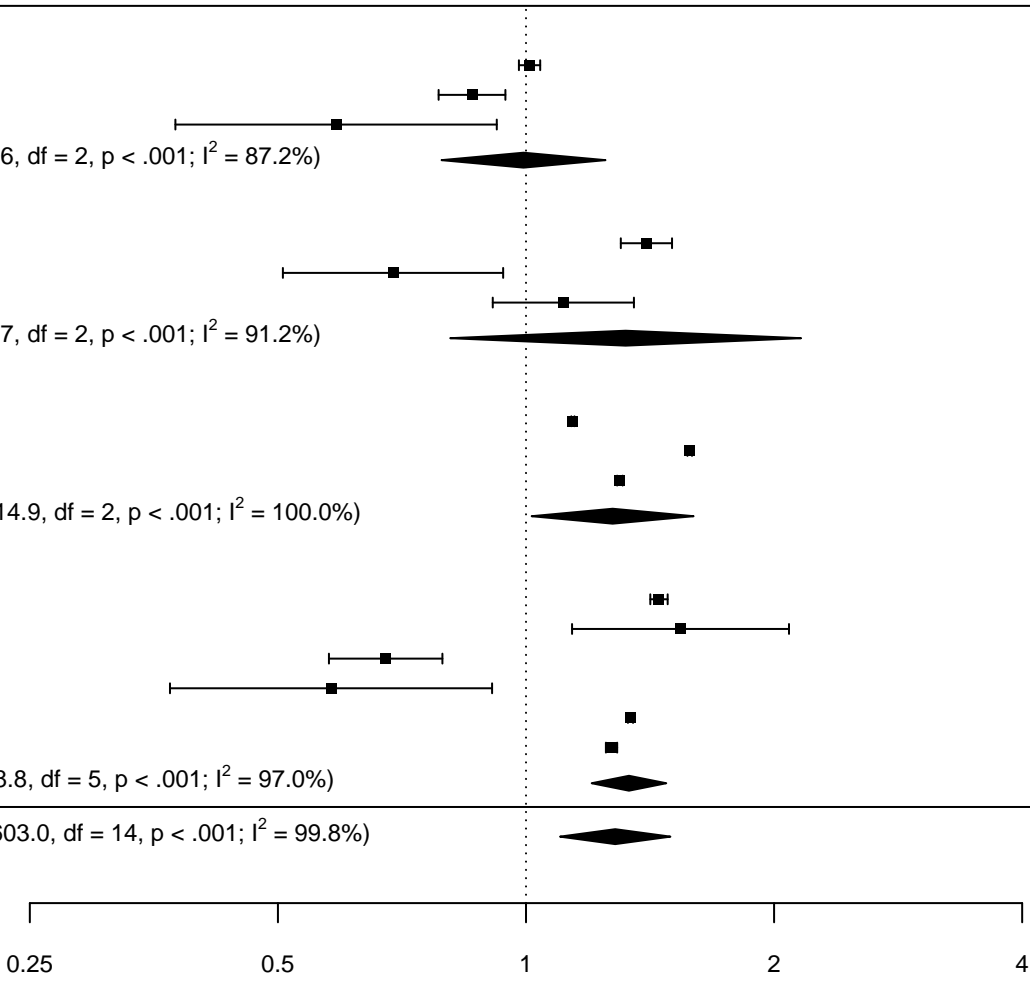

1  
2  
3  
4  
5  
6  
7  
8  
9  
10  
11  
12  
13  
14  
15  
16  
17  
18  
19  
20  
21  
22  
23  
24  
25  
26  
27  
28  
29  
30  
31  
32  
33  
34  
35  
36  
37

Author(s) and Year

Risk Ratio [95% CI]

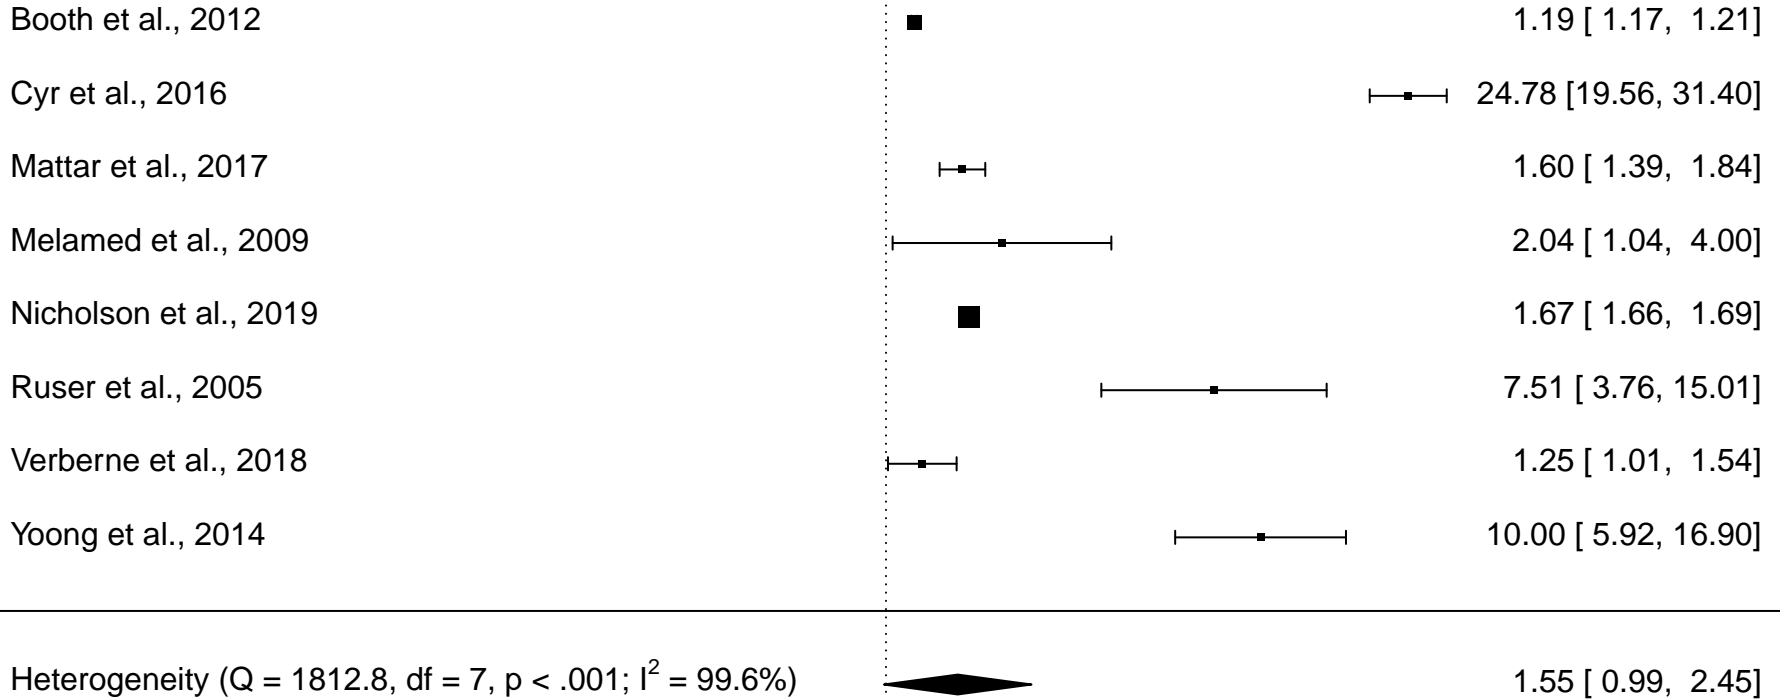

0.25 0.5 1 2 4 8 16 32

Risk Ratio (log scale)



1  
2  
3  
4  
5  
6  
7  
8  
9  
10  
11  
12  
13  
14  
15  
16  
17  
18  
19  
20  
21  
22  
23  
24  
25  
26  
27  
28  
29  
30  
31  
32  
33  
34  
35  
36  
37

Author(s) and Year

Risk Ratio [95% CI]

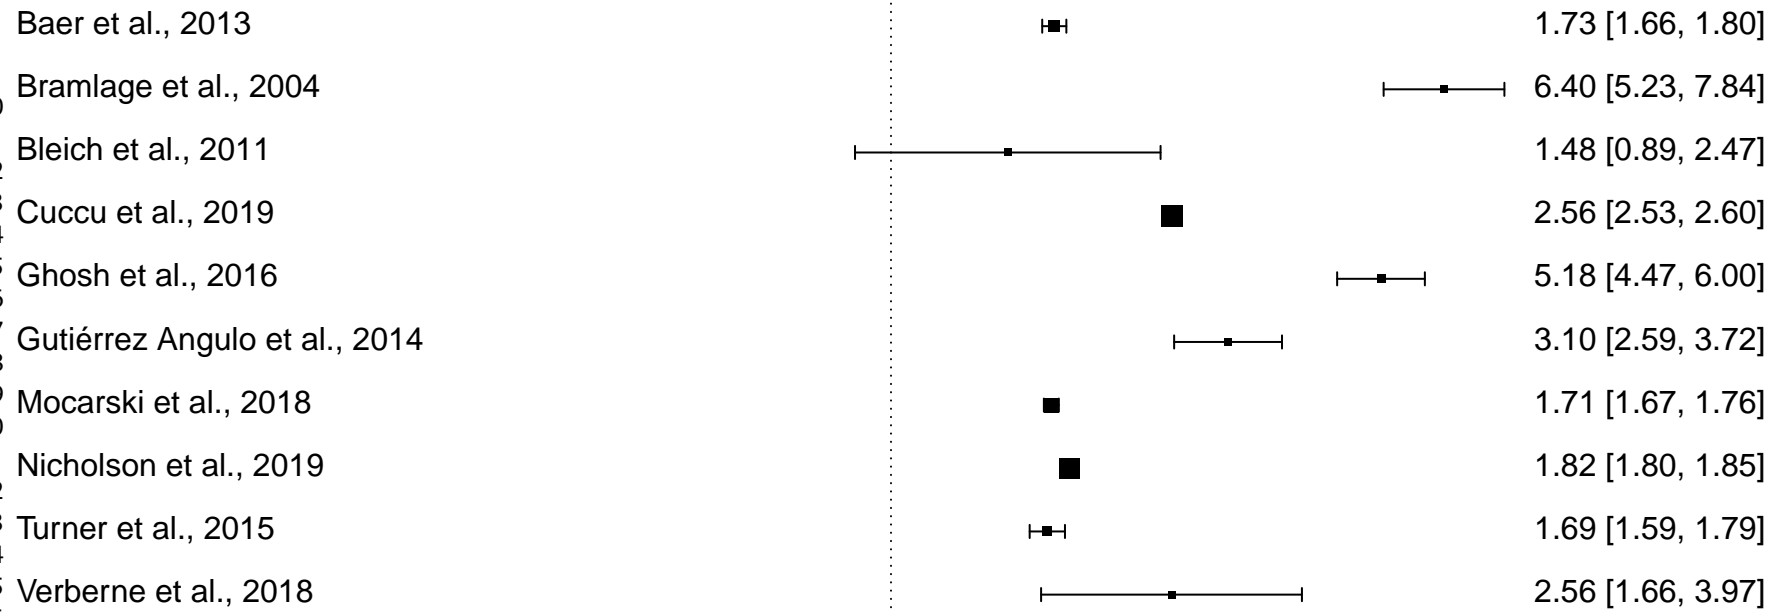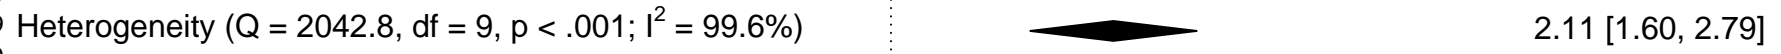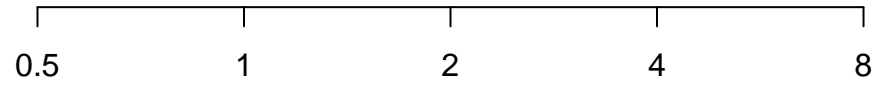

## Supplementary File

### Table of contents

|                                                                                            |    |
|--------------------------------------------------------------------------------------------|----|
| Supplementary Table S1: Search strategy .....                                              | 2  |
| Ovid MEDLINE(R) ALL <1946 to present> .....                                                | 2  |
| Embase via OvidSP (1947 - present) .....                                                   | 5  |
| CINAHL via EBSCO .....                                                                     | 8  |
| Web searching .....                                                                        | 10 |
| Supplementary Table S2: List of excluded studies with reasons .....                        | 12 |
| Supplementary Table S3: Characteristics and summary of quantitative studies reviewed ..... | 13 |
| Supplementary Table S4: Characteristics and summary of qualitative studies reviewed .....  | 29 |
| Supplementary Table S5: Risk of bias assessment of studies reviewed .....                  | 33 |
| Supplementary Section S6: Summary of results from all meta-analyses .....                  | 36 |
| S6.1 Sex as a predictor of BMI assessment .....                                            | 36 |
| S6.2 Age as a predictor of BMI assessment .....                                            | 37 |
| S6.3 Race/ethnicity as a predictor of BMI assessment .....                                 | 39 |
| S6.4 Deprivation as a predictor of BMI assessment .....                                    | 42 |
| S6.5 Health insurance status as a predictor of BMI assessment .....                        | 43 |
| S6.6 BMI category as a predictor of BMI assessment .....                                   | 44 |
| S6.7 Smoking status as a predictor of BMI assessment .....                                 | 46 |
| S6.8 The number of comorbidities as a predictor of BMI assessment .....                    | 46 |
| S6.9 Cardiovascular disease as a predictor of BMI assessment .....                         | 48 |
| S6.10 Diabetes as a predictor of BMI assessment .....                                      | 50 |
| S6.11 Dyslipidaemia disease as a predictor of BMI assessment .....                         | 51 |
| S6.12 Hypertension as a predictor of BMI assessment .....                                  | 52 |
| S6.13 Mental illness as a predictor of BMI assessment .....                                | 53 |
| S6.14 Depression as a predictor of BMI assessment .....                                    | 54 |
| Supplementary Section S7: References .....                                                 | 55 |

**Supplementary Table S1: Search strategy**

Ovid MEDLINE(R) ALL &lt;1946 to present&gt;

| #  | Query                                                                                                                                                             | Results from 25 <sup>th</sup> Sept. 2021 |
|----|-------------------------------------------------------------------------------------------------------------------------------------------------------------------|------------------------------------------|
| 1  | Primary Health Care/                                                                                                                                              | 85,205                                   |
| 2  | general practice/ or family practice/                                                                                                                             | 76,814                                   |
| 3  | (primary adj2 (care or health*)).tw.                                                                                                                              | 157,253                                  |
| 4  | ((general or family) adj (practice* or practitioner*)).tw.                                                                                                        | 93,468                                   |
| 5  | ((family or community or practice*) adj (medic* or doctor* or physician* or nurs*)).tw.                                                                           | 47,774                                   |
| 6  | 1 or 2 or 3 or 4 or 5                                                                                                                                             | 312,040                                  |
| 7  | obesity/ or obesity, abdominal/ or obesity, maternal/ or obesity, metabolically benign/ or obesity, morbid/                                                       | 221,007                                  |
| 8  | Overweight/                                                                                                                                                       | 28,308                                   |
| 9  | Overnutrition/                                                                                                                                                    | 623                                      |
| 10 | overnutrition.tw.                                                                                                                                                 | 1,652                                    |
| 11 | hypernutrition.tw.                                                                                                                                                | 44                                       |
| 12 | obes*.tw.                                                                                                                                                         | 330,756                                  |
| 13 | overweight.tw.                                                                                                                                                    | 76,708                                   |
| 14 | 7 or 8 or 9 or 10 or 11 or 12 or 13                                                                                                                               | 398,378                                  |
| 15 | Risk Assessment/                                                                                                                                                  | 290,450                                  |
| 16 | risk analys*.tw.                                                                                                                                                  | 6,900                                    |
| 17 | nutrition assessment/                                                                                                                                             | 16,427                                   |
| 18 | Nutrition* assessment*.tw.                                                                                                                                        | 5,943                                    |
| 19 | Anthropometry/                                                                                                                                                    | 40,283                                   |
| 20 | anthropometr*.tw.                                                                                                                                                 | 59,988                                   |
| 21 | "body weights and measures"/ or body fat distribution/ or body mass index/ or body size/ or body height/ or body weight/ or sagittal abdominal diameter/ or waist | 365,578                                  |

|    |                                                                                                           |           |
|----|-----------------------------------------------------------------------------------------------------------|-----------|
|    | circumference/ or waist-height ratio/ or body surface area/<br>or skinfold thickness/ or waist-hip ratio/ |           |
| 22 | body mass index/                                                                                          | 138,215   |
| 23 | quetelet index.tw.                                                                                        | 491       |
| 24 | Body mass index*.tw.                                                                                      | 205,275   |
| 25 | BMI.tw.                                                                                                   | 163,110   |
| 26 | waist hip ratio*.tw.                                                                                      | 4,227     |
| 27 | skinfold thickness.tw.                                                                                    | 3,820     |
| 28 | ((waist or abdominal) adj2 (circumference* or diameter*<br>or measur*).tw.                                | 36,332    |
| 29 | waist height ratio*.tw.                                                                                   | 475       |
| 30 | (obesity adj2 (manag* or guideline* or measur*).tw.                                                       | 6,750     |
| 31 | (weight adj2 (assess* or Measur* or manag* or<br>record*).tw.                                             | 26,808    |
| 32 | 15 or 16 or 17 or 18 or 19 or 20 or 21 or 22 or 23 or 24 or<br>25 or 26 or 27 or 28 or 29 or 30 or 31     | 897,461   |
| 33 | 6 and 14 and 32                                                                                           | 3,947     |
| 34 | observational study/                                                                                      | 112,847   |
| 35 | exp Cohort Studies/                                                                                       | 2,238,711 |
| 36 | Cross-Sectional Studies/                                                                                  | 395,811   |
| 37 | exp case-control studies/                                                                                 | 1,243,913 |
| 38 | case reports/                                                                                             | 2,221,553 |
| 39 | observational stud*.tw.                                                                                   | 129,947   |
| 40 | cohort stud*.tw.                                                                                          | 252,108   |
| 41 | cross-sectional stud*.tw.                                                                                 | 202,987   |
| 42 | case control stud*.tw.                                                                                    | 114,641   |
| 43 | case series.tw.                                                                                           | 87,502    |
| 44 | case stud*.tw.                                                                                            | 108,683   |

|    |                                                                                                                                                                            |           |
|----|----------------------------------------------------------------------------------------------------------------------------------------------------------------------------|-----------|
| 45 | case histor*.tw.                                                                                                                                                           | 12,948    |
| 46 | case report*.tw.                                                                                                                                                           | 407,817   |
| 47 | case comparison*.tw.                                                                                                                                                       | 708       |
| 48 | case base.tw.                                                                                                                                                              | 122       |
| 49 | prevalence stud*.tw.                                                                                                                                                       | 5,709     |
| 50 | longitudinal stud*.tw.                                                                                                                                                     | 84,271    |
| 51 | follow up stud*.tw.                                                                                                                                                        | 52,359    |
| 52 | prospective stud*.tw.                                                                                                                                                      | 188,483   |
| 53 | retrospective stud*.tw.                                                                                                                                                    | 183,893   |
| 54 | Electronic Health Records/                                                                                                                                                 | 23,614    |
| 55 | health record*.tw.                                                                                                                                                         | 24,610    |
| 56 | medical record*.tw.                                                                                                                                                        | 122,413   |
| 57 | patient record*.tw.                                                                                                                                                        | 13,682    |
| 58 | qualitative research/                                                                                                                                                      | 69,103    |
| 59 | qualitative.tw.                                                                                                                                                            | 262,287   |
| 60 | interview/                                                                                                                                                                 | 29,952    |
| 61 | interview*.tw.                                                                                                                                                             | 396,852   |
| 62 | experienc*.tw.                                                                                                                                                             | 1,239,418 |
| 63 | 34 or 35 or 36 or 37 or 38 or 39 or 40 or 41 or 42 or 43 or 44 or 45 or 46 or 47 or 48 or 49 or 50 or 51 or 52 or 53 or 54 or 55 or 56 or 57 or 58 or 59 or 60 or 61 or 62 | 6,715,787 |
| 64 | 33 and 63                                                                                                                                                                  | 2,347     |
| 65 | exp child/ or child, preschool/ or exp infant/                                                                                                                             | 2,613,117 |
| 66 | child*.tw.                                                                                                                                                                 | 1,486,218 |
| 67 | 65 or 66                                                                                                                                                                   | 3,025,083 |
| 68 | 64 not 67                                                                                                                                                                  | 1,769     |
| 69 | limit 68 to English language                                                                                                                                               | 1,661     |

Embase via OvidSP (1947 - present)

Search repeated on 25/11/21

| #  | Query                                                                                                                                                                                                                              | Results from 25th Nov 2021 |
|----|------------------------------------------------------------------------------------------------------------------------------------------------------------------------------------------------------------------------------------|----------------------------|
| 1  | primary health care/                                                                                                                                                                                                               | 71,908                     |
| 2  | general practice/                                                                                                                                                                                                                  | 82,366                     |
| 3  | (primary adj2 (care or health*)).tw.                                                                                                                                                                                               | 211,681                    |
| 4  | ((general or family) adj (practice* or practitioner*)).tw.                                                                                                                                                                         | 119,145                    |
| 5  | ((family or community or practice*) adj (medic* or doctor* or physician* or nurs*)).tw.                                                                                                                                            | 61,008                     |
| 6  | 1 or 2 or 3 or 4 or 5                                                                                                                                                                                                              | 402,212                    |
| 7  | obesity/ or overnutrition/ or abdominal obesity/ or diabetic obesity/ or maternal obesity/ or metabolic syndrome x/ or metabolically benign obesity/ or morbid obesity/ or obesity associated inflammation/ or sarcopenic obesity/ | 564,931                    |
| 8  | overweight.tw.                                                                                                                                                                                                                     | 116,959                    |
| 9  | overnutrition.tw.                                                                                                                                                                                                                  | 2,129                      |
| 10 | hypernutrition.tw.                                                                                                                                                                                                                 | 87                         |
| 11 | obes*.tw.                                                                                                                                                                                                                          | 497,753                    |
| 12 | 7 or 8 or 9 or 10 or 11                                                                                                                                                                                                            | 691,801                    |
| 13 | risk assessment/                                                                                                                                                                                                                   | 642,360                    |
| 14 | risk analys*.tw.                                                                                                                                                                                                                   | 10,891                     |
| 15 | nutritional assessment/                                                                                                                                                                                                            | 32,946                     |
| 16 | nutrition* assessment*.tw.                                                                                                                                                                                                         | 9,486                      |
| 17 | anthropometry/                                                                                                                                                                                                                     | 60,255                     |
| 18 | anthropometr*.tw.                                                                                                                                                                                                                  | 88,470                     |
| 19 | body weight/ or body weight change/ or body weight control/                                                                                                                                                                        | 350,919                    |
| 20 | body fat distribution/ or body fat percentage/                                                                                                                                                                                     | 8,611                      |
| 21 | body mass/                                                                                                                                                                                                                         | 514,870                    |

|    |                                                                                                                                                                                                                                                                                                                                                                                                 |           |
|----|-------------------------------------------------------------------------------------------------------------------------------------------------------------------------------------------------------------------------------------------------------------------------------------------------------------------------------------------------------------------------------------------------|-----------|
| 22 | anthropometric parameters/ or abdominal circumference/<br>or adipose tissue thickness/ or body adiposity index/ or<br>body fat percentage/ or body height/ or body mass/ or<br>body size/ or body weight/ or sagittal abdominal diameter/<br>or total body fat/ or total body surface area/ or waist<br>circumference/ or waist hip ratio/ or waist to height ratio/<br>or weight height ratio/ | 879,707   |
| 23 | skinfold thickness/                                                                                                                                                                                                                                                                                                                                                                             | 14,631    |
| 24 | quetelet index.tw.                                                                                                                                                                                                                                                                                                                                                                              | 568       |
| 25 | body mass index*.tw.                                                                                                                                                                                                                                                                                                                                                                            | 301,374   |
| 26 | BMI.tw.                                                                                                                                                                                                                                                                                                                                                                                         | 348,314   |
| 27 | waist hip ratio*.tw.                                                                                                                                                                                                                                                                                                                                                                            | 6,517     |
| 28 | skinfold thickness*.tw.                                                                                                                                                                                                                                                                                                                                                                         | 5,749     |
| 29 | ((waist or abdominal) adj2 (circumference* or diameter*<br>or measur*).tw.                                                                                                                                                                                                                                                                                                                      | 58,312    |
| 30 | waist height ratio*.tw.                                                                                                                                                                                                                                                                                                                                                                         | 750       |
| 31 | (obesity adj2 (manag* or guideline* or measur*).tw.                                                                                                                                                                                                                                                                                                                                             | 9,735     |
| 32 | (weight adj2 (assess* or measur* or manag* or<br>record*).tw.                                                                                                                                                                                                                                                                                                                                   | 40,197    |
| 33 | 13 or 14 or 15 or 16 or 17 or 18 or 19 or 20 or 21 or 22 or<br>23 or 24 or 25 or 26 or 27 or 28 or 29 or 30 or 31 or 32                                                                                                                                                                                                                                                                         | 1,702,045 |
| 34 | 6 and 12 and 33                                                                                                                                                                                                                                                                                                                                                                                 | 7,229     |
| 35 | observational study/ or observational stud*.tw.                                                                                                                                                                                                                                                                                                                                                 | 312,495   |
| 36 | cohort analysis/ or cohort stud*.tw.                                                                                                                                                                                                                                                                                                                                                            | 855,948   |
| 37 | cross-sectional study/ or cross-sectional stud*.tw.                                                                                                                                                                                                                                                                                                                                             | 493,778   |
| 38 | case control study/ or population based case control study/<br>or case control stud*.tw.                                                                                                                                                                                                                                                                                                        | 238,398   |
| 39 | case report/ or (case report* or case histor* or case base or<br>case comparison* or case series).tw.                                                                                                                                                                                                                                                                                           | 2,909,888 |
| 40 | longitudinal study/ or longitudinal stud*.tw. or follow up<br>stud*.tw.                                                                                                                                                                                                                                                                                                                         | 267,646   |
| 41 | prospective study/ or prospective stud*.tw.                                                                                                                                                                                                                                                                                                                                                     | 824,409   |

|    |                                                                                          |           |
|----|------------------------------------------------------------------------------------------|-----------|
| 42 | retrospective study/ or retrospective stud*.tw.                                          | 1,215,975 |
| 43 | electronic health record/ or (health record* or medical record* or patient* record*).tw. | 283,785   |
| 44 | quantitative.tw                                                                          | 867,485   |
| 45 | qualitative research/                                                                    | 94,353    |
| 46 | qualitative.tw.                                                                          | 334,859   |
| 47 | interview/                                                                               | 227,656   |
| 48 | interview*.tw.                                                                           | 508,149   |
| 49 | experienc*.tw.                                                                           | 1,787,221 |
| 50 | 35 or 36 or 37 or 38 or 39 or 40 or 41 or 42 or 43 or 44 or 45 or 46 or 47 or 48 or 49   | 8,044,506 |
| 51 | 34 and 50                                                                                | 3,787     |
| 52 | exp child/                                                                               | 2,994,174 |
| 53 | child*.tw.                                                                               | 1,998,334 |
| 54 | 52 or 53                                                                                 | 3,517,058 |
| 55 | 51 not 54                                                                                | 3,008     |
| 56 | limit 55 to english language                                                             | 2,904     |



## CINAHL via EBSCO

|     |                                                                                                                                                                                                                     |           |
|-----|---------------------------------------------------------------------------------------------------------------------------------------------------------------------------------------------------------------------|-----------|
| S1  | (MH "Primary Health Care")                                                                                                                                                                                          | (68,452)  |
| S2  | (MH "Family Practice")                                                                                                                                                                                              | (26,060)  |
| S3  | TI ( primary N2 (care OR health*) ) OR AB ( primary N2 (care OR health*) )                                                                                                                                          | (98,478)  |
| S4  | TI "general practice*" OR AB "general practice*"                                                                                                                                                                    | (17,218)  |
| S5  | TI "family practice*" OR AB "family practice*"                                                                                                                                                                      | (2,583)   |
| S6  | TI "family practitioner*" OR AB "family practitioner*"                                                                                                                                                              | (532)     |
| S7  | TI "general practitioner*" OR AB "general practitioner*"                                                                                                                                                            | (20,299)  |
| S8  | TI ( ((family OR community OR practice*) N2 (Doctor* OR physician* OR NURS*)) ) OR AB ( ((family OR community OR practice*) N2 (Doctor* OR physician* OR NURS*)) )                                                  | (89,399)  |
| S9  | S1 OR S2 OR S3 OR S4 OR S5 OR S6 OR S7 OR S8                                                                                                                                                                        | (236,098) |
| S10 | (MH "Overnutrition") OR (MM "Obesity, Maternal") OR (MM "Obesity, Morbid") OR (MH "Obesity+")                                                                                                                       | (107,322) |
| S11 | TI overweight OR obes* OR overnutrition OR hypernutrition                                                                                                                                                           | (59,247)  |
| S12 | AB overweight OR obes* OR overnutrition OR hypernutrition                                                                                                                                                           | (96,744)  |
| S13 | S10 OR S11 OR S12                                                                                                                                                                                                   | (152,475) |
| S14 | (MH "Risk Assessment")                                                                                                                                                                                              | (121,279) |
| S15 | TI risk analysis OR AB risk analysis                                                                                                                                                                                | (27,946)  |
| S16 | (MH "Nutritional Assessment")                                                                                                                                                                                       | (16,752)  |
| S17 | TI nutrition* assessment* OR AB nutrition* assessment*                                                                                                                                                              | (5,092)   |
| S18 | (MH "Body Mass Index") OR (MH "Body Size") OR (MH "Body Surface Area") OR (MH "Body Weight+") OR (MH "Waist Circumference") OR (MH "Waist-Hip Ratio") OR (MH "Body Weights and Measures+") OR (MH "Anthropometry+") | (254,870) |

|     |                                                                                                                                                                                                                                                          |           |
|-----|----------------------------------------------------------------------------------------------------------------------------------------------------------------------------------------------------------------------------------------------------------|-----------|
| S19 | TI ( "body Mass index" OR BMI OR "quetelet index" OR "waist hip ratio*" OR "skinfold thickness" OR "waist height ratio*" ) OR AB ( "body Mass index" OR BMI OR "quetelet index" OR "waist hip ratio*" OR "skinfold thickness" OR "waist height ratio*" ) | (99,434)  |
| S20 | TI ( ((waist OR abdominal) N2 (circumference* OR diameter* OR measur*)) ) OR AB ( ((waist OR abdominal) N2 (circumference* OR diameter* OR measur*)) )                                                                                                   | (14,244)  |
| S21 | TI ( obesity N2 (manag* OR guideline* OR measur*) ) OR AB ( obesity N2 (manag* OR guideline* OR measur*) )                                                                                                                                               | (3,649)   |
| S22 | TI ( weight N2 (manag* OR assess* OR measur* OR record*) ) OR AB ( weight N2 (manag* OR assess* OR measur* OR record*) )                                                                                                                                 | (14,646)  |
| S23 | S14 OR S15 OR S16 OR S17 OR S18 OR S19 OR S20 OR S21 OR S22                                                                                                                                                                                              | (443,890) |
| S24 | S9 AND S13 AND S23                                                                                                                                                                                                                                       | (3,941)   |
| S25 | (MH "Prospective Studies+") OR (MH "Cross Sectional Studies") OR (MH "Case Control Studies+")                                                                                                                                                            | (742,114) |
| S26 | TI ( "cohort stud*" OR "case control stud*" OR "observational stud*" OR "cross sectional stud*" ) OR AB ( "cohort stud*" OR "case control stud*" OR "observational stud*" OR "cross sectional stud*" )                                                   | (267,124) |
| S27 | (MH "Case Studies")                                                                                                                                                                                                                                      | (25,211)  |
| S28 | TI ( "case report*" OR "case stud*" OR "case series" OR "case histor*" OR "case base" OR "case comparison*" ) OR AB ( "case report*" OR "case stud*" OR "case series" OR "case histor*" OR "case base" OR "case comparison*" )                           | (173,690) |
| S29 | TI ( "prevalence stud*" OR "longitudinal stud*" OR "Follow up stud*" OR "prospective stud*" OR "retrospective stud*" ) OR AB ( "prevalence stud*" OR "longitudinal stud*" OR "Follow up stud*" OR "prospective stud*" OR "retrospective stud*" )         | (142,287) |
| S30 | (MH "Electronic Health Records+")                                                                                                                                                                                                                        | (27,388)  |

|     |                                                                                                                                          |             |
|-----|------------------------------------------------------------------------------------------------------------------------------------------|-------------|
| S31 | TI ( "medical record*" OR "patient* record*" OR "health record*" ) OR AB ( "medical record*" OR "patient* record*" OR "health record*" ) | (64,123)    |
| S32 | (MH "Qualitative Studies+")                                                                                                              | (161,978)   |
| S33 | TI qualitative OR AB qualitative                                                                                                         | (143,640)   |
| S34 | (MH "Interviews+")                                                                                                                       | (234,331)   |
| S35 | TI interview* OR AB interview*                                                                                                           | (237,270)   |
| S36 | TI experienc* AND AB experienc*                                                                                                          | (54,416)    |
| S37 | S25 OR S26 OR S27 OR S28 OR S29 OR S30 OR S31 OR S32 OR S33 OR S34 OR S35 OR S36                                                         | (1,477,201) |
| S38 | S24 AND S37                                                                                                                              | (1,538)     |
| S39 | (MH "Child+")                                                                                                                            | (713,632)   |
| S40 | TI child* OR AB child*                                                                                                                   | (535,788)   |
| S41 | S39 OR S40                                                                                                                               | (901,349)   |
| S42 | (S38) NOT (S41)                                                                                                                          | (1,082)     |

### Web searching

**NOTES:** Four papers (not retrieved in any of the database searches) were identified by via internet searching.

1. McLaughlin, Hamilton, K., & Kipping, R. (2017). Epidemiology of adult overweight recording and management by UK GPs: a systematic review. *British Journal of General Practice*, 67(663), e676–e683. <https://doi.org/10.3399/bjgp17X692309>

This paper was not retrieved in the searches because it **did not contain any terms from the qual/quant concept group**.

2. Dalton, Bottle, A., Okoro, C., Majeed, A., & Millett, C. (2011). Implementation of the NHS Health Checks programme: baseline assessment of risk factor recording in an urban culturally diverse setting. *Family Practice*, 28(1), 34–40. <https://doi.org/10.1093/fampra/cmq068>

This paper was not retrieved because it **does not contain any terms from the obesity/overweight concept group**.

- 1  
2  
3 3. Turner, Harris, M. F., & Mazza, D. (2015). Obesity management in general practice:  
4 does current practice match guideline recommendations? *Medical Journal of*  
5 *Australia*, 202(7), 370–372. <https://doi.org/10.5694/mja14.00998>  
6  
7

8 This paper was not retrieved because it contained the word children in the abstract –  
9 **this paper was eliminated by the NOT child\* component of the search**  
10

- 11  
12 4. Gaynor, Habermann, B., & Wright, R. (2018). Waist Circumference Measurement  
13 Diffusion in Primary Care. *Journal for Nurse Practitioners*, 14(9), 683–688.e1.  
14 <https://doi.org/10.1016/j.nurpra.2018.06.002>  
15

16  
17 This paper is indexed in CINAHL, however was not retrieved because it **does not**  
18 **contain any term obesity in the article record in CINAHL.**  
19  
20  
21  
22  
23  
24  
25  
26  
27  
28  
29  
30  
31  
32  
33  
34  
35  
36  
37  
38  
39  
40  
41  
42  
43  
44  
45  
46  
47  
48  
49  
50  
51  
52  
53  
54  
55  
56  
57  
58  
59  
60

**Supplementary Table S2: List of excluded studies with reasons***Quantitative studies*

- Did not meet eligibility criteria for population and setting[1-19]
- Did not meet eligibility criteria for patient factor[1 2 5-9 11-14 16 18-27]
- Did not meet eligibility criteria for outcome[1 5 6 8 9 11-13 16 18 19 23 28-51]

*Qualitative studies*

- Did not meet eligibility criteria for population and setting[52]
- Did not meet eligibility criteria for interest[5 6 18 20 28 29 31 52-62]

For peer review only

**Supplementary Table S3: Characteristics and summary of quantitative studies reviewed**

| Study details                                                                                                                                                                      | Population and setting                                                                                                                                                                                                                                                                                                                                                                                                                                                                                                                                                                                                      | Patient factors (independent variables)                                                                                                                                                                                                               | Outcomes (obesity related anthropometric assessments) | Statistical methods, results/effect estimates                                                                                                                                                                                                                                                                                                                                                                                                                                                                                                                                                                                                                                                                             | Author's conclusions and reviewer's comments                                                                                                                                                                                                                                                                                                                                                                                                                                                                                           |
|------------------------------------------------------------------------------------------------------------------------------------------------------------------------------------|-----------------------------------------------------------------------------------------------------------------------------------------------------------------------------------------------------------------------------------------------------------------------------------------------------------------------------------------------------------------------------------------------------------------------------------------------------------------------------------------------------------------------------------------------------------------------------------------------------------------------------|-------------------------------------------------------------------------------------------------------------------------------------------------------------------------------------------------------------------------------------------------------|-------------------------------------------------------|---------------------------------------------------------------------------------------------------------------------------------------------------------------------------------------------------------------------------------------------------------------------------------------------------------------------------------------------------------------------------------------------------------------------------------------------------------------------------------------------------------------------------------------------------------------------------------------------------------------------------------------------------------------------------------------------------------------------------|----------------------------------------------------------------------------------------------------------------------------------------------------------------------------------------------------------------------------------------------------------------------------------------------------------------------------------------------------------------------------------------------------------------------------------------------------------------------------------------------------------------------------------------|
| <p><b>Authors:</b><br/>Aleem et al. [63]</p> <p><b>Year published:</b><br/>2015</p> <p><b>Study design:</b><br/>Cross sectional study</p> <p><b>Country:</b><br/>United States</p> | <p><b>Sample size:</b><br/>N=10,931 records</p> <p><b>Inclusion criteria:</b></p> <ul style="list-style-type: none"> <li>• Patients aged 18-65 years before or during the study period</li> </ul> <p><b>Exclusion criteria:</b></p> <ul style="list-style-type: none"> <li>• Visits with missing data</li> </ul> <p><b>Setting and population:</b></p> <ul style="list-style-type: none"> <li>• Records from Dartmouth-Hitchcock Medical Center data repository system for the year 2012 for the patients coming for preventive care visit in 3 adult primary care center within the system in New Hampshire, US</li> </ul> | <p><b>1. Factors associated with BMI calculation:</b></p> <ul style="list-style-type: none"> <li>• Insurance type</li> </ul>                                                                                                                          | <p>BMI calculation</p>                                | <p><b>Statistical analysis:</b></p> <ul style="list-style-type: none"> <li>• Descriptive for proportions</li> <li>• Chi-square test or a Fisher's test to find association of the variable with the BMI recording (not relevant to calculated PR below)</li> </ul> <p><b>Results/effects estimates:</b></p> <p>1. Factors associated with BMI calculation:</p> <ul style="list-style-type: none"> <li>• Insurance type: (Medicaid Calculated PR*: 1.04, Medicare Calculated PR*: 1.01, others including managed care Calculated PR*: 1.02, Self-pay Calculated PR*: 0.97, Ref Private insurance)</li> </ul>                                                                                                               | <p><b>Author's conclusions:</b><br/>"Despite high clinician-reported documentation of obesity as an active problem, actual obesity documentation rates remained low in a rural academic medical center."</p> <p><b>Reviewer's comments:</b><br/>This study shows that patients with Medicare and Medicaid insurance were positively associated with BMI calculation and patients on self-pay were negatively associated with BMI calculation.</p> <p>This study has clearly met 5/8 (63%) criteria in the critical appraisal tool.</p> |
| <p><b>Authors:</b><br/>Baer et al. [64]</p> <p><b>Year published:</b><br/>2013</p> <p><b>Study design:</b><br/>Cross sectional study</p> <p><b>Country:</b><br/>United States</p>  | <p><b>Sample size:</b><br/>N=219,356</p> <p><b>Inclusion criteria:</b></p> <ul style="list-style-type: none"> <li>• Patients aged <math>\geq 18</math> years before or during the study period</li> <li>• Patients who had at least 2 visits with the same clinician</li> <li>• Patients who were not pregnant at the time of the visit</li> </ul> <p><b>Exclusion criteria:</b><br/>None</p> <p><b>Setting and population:</b></p>                                                                                                                                                                                         | <p><b>1. Factors associated with documentation of BMI:</b></p> <ul style="list-style-type: none"> <li>• Age</li> <li>• Sex</li> <li>• Ethnicity</li> <li>• Primary insurance</li> <li>• Frequency of consultation</li> <li>• Comorbidities</li> </ul> | <p>BMI documentation</p>                              | <p><b>Statistical analysis:</b></p> <ul style="list-style-type: none"> <li>• Descriptive for proportions</li> <li>• Logistic regression to estimate OR for documentation of BMI, adjusted for covariates</li> </ul> <p><b>Results/effects estimates:</b><br/>Proportion of patients with at least one BMI documentation between 2004 and 2008:</p> <ul style="list-style-type: none"> <li>• 65.9% had BMI documented</li> </ul> <p>1. Predictors of BMI documentation:</p> <ul style="list-style-type: none"> <li>• Age (<math>\geq 70</math>y OR: 0.60, 60-69y OR: 0.94, 30-39y OR: 0.93, Ref 18-29y)</li> <li>• Sex: Female (OR: 1.45, Ref male)</li> <li>• Ethnicity (other or missing OR: 0.84, Ref White)</li> </ul> | <p><b>Author's conclusions:</b><br/>"In conclusion, many primary care patients lack documentation of BMI in the EHR, and most overweight and obese patients do not have a diagnosis on the problem list. Further research should focus on interventions to improve documentation of BMI and diagnosis and management of overweight and obesity in the primary care setting."</p> <p><b>Reviewer's comments:</b></p>                                                                                                                    |

|                                                                                                                                                                                                            |                                                                                                                                                                                                                                                                                                                                                                                                                                                                                                                                                                                 |                                                                                                                                                                                                                                                                  |                          |                                                                                                                                                                                                                                                                                                                                                                                                                                                                                                                                                                                                                                                                                                                             |                                                                                                                                                                                                                                                                                                                                                                                                                                                                                                                                                                      |
|------------------------------------------------------------------------------------------------------------------------------------------------------------------------------------------------------------|---------------------------------------------------------------------------------------------------------------------------------------------------------------------------------------------------------------------------------------------------------------------------------------------------------------------------------------------------------------------------------------------------------------------------------------------------------------------------------------------------------------------------------------------------------------------------------|------------------------------------------------------------------------------------------------------------------------------------------------------------------------------------------------------------------------------------------------------------------|--------------------------|-----------------------------------------------------------------------------------------------------------------------------------------------------------------------------------------------------------------------------------------------------------------------------------------------------------------------------------------------------------------------------------------------------------------------------------------------------------------------------------------------------------------------------------------------------------------------------------------------------------------------------------------------------------------------------------------------------------------------------|----------------------------------------------------------------------------------------------------------------------------------------------------------------------------------------------------------------------------------------------------------------------------------------------------------------------------------------------------------------------------------------------------------------------------------------------------------------------------------------------------------------------------------------------------------------------|
|                                                                                                                                                                                                            | <ul style="list-style-type: none"> <li>Records from 25 primary care practices within a large academic care network in Boston, Massachusetts, US, between 2004 and 2008</li> </ul>                                                                                                                                                                                                                                                                                                                                                                                               |                                                                                                                                                                                                                                                                  |                          | <ul style="list-style-type: none"> <li>Primary insurance (Medicare OR: 0.94, no insurance or self-pay OR: 0.64, Ref private)</li> <li>Frequency of consultation (6-9 OR: 1.87, 10-14 OR: 2.78, <math>\geq 15</math> OR: 4.66, Ref 2-5)</li> <li>Number of obesity-related comorbidities (1 OR: 1.34, 2 OR: 1.48, <math>\geq 3</math> OR: 1.73, Ref 0 comorbidity)</li> </ul>                                                                                                                                                                                                                                                                                                                                                | <p>This study shows that female sex, other or missed ethnicity, younger age, having private insurance, increasing number of visits to clinic, and increasing number of chronic medical conditions were positively associated with BMI documentation.</p> <p>This study has clearly met 8/8 (100%) criteria in the critical appraisal tool.</p>                                                                                                                                                                                                                       |
| <p><b>Authors:</b><br/>Bleich, Pickett-Blakely &amp; Cooper [65]</p> <p><b>Year published:</b><br/>2011</p> <p><b>Study design:</b><br/>Cross sectional study</p> <p><b>Country:</b><br/>United States</p> | <p><b>Sample size:</b><br/>N=2,458</p> <p><b>Inclusion criteria:</b></p> <ul style="list-style-type: none"> <li>Patients aged <math>\geq 18</math> years</li> <li>Patients who had a BMI of <math>\geq 30</math> kg/m<sup>2</sup></li> </ul> <p><b>Exclusion criteria:</b><br/>None</p> <p><b>Setting and population:</b></p> <ul style="list-style-type: none"> <li>Records of patients from participating non-federally employed physicians in 2005 National Ambulatory Medical Care Survey from randomly selected geographic area and speciality in United States</li> </ul> | <p><b>1. Factors associated with obesity diagnosis:</b></p> <ul style="list-style-type: none"> <li>Race/ethnicity</li> <li>Sex</li> <li>Age</li> <li>Insurance</li> <li>Geographic region</li> <li>Co-morbidity risk status</li> <li>Obesity category</li> </ul> | <p>Obesity diagnosis</p> | <p><b>Statistical analysis:</b></p> <ul style="list-style-type: none"> <li>Descriptive for proportions</li> <li>Logistic regression to estimate OR for obesity diagnosis, adjusted for covariates</li> </ul> <p><b>Results/effects estimates:</b><br/>Proportion of patients with obesity diagnosis at the time of survey:</p> <ul style="list-style-type: none"> <li>28.9% had obesity diagnosis</li> </ul> <p>1. Predictors of BMI documentation:</p> <ul style="list-style-type: none"> <li>Sex: Women (OR: 1.54, Ref men)</li> <li>Age (18-29y OR: 2.61, Ref <math>\geq 65</math>y)</li> <li>Geographic region (Midwest OR: 1.78, Ref South)</li> <li>Obesity Class (III OR: 4.36, II OR: 2.08, Ref Class I)</li> </ul> | <p><b>Author’s conclusions:</b><br/>“Most obese patients do not receive an obesity diagnosis or weight-related counseling. Practice implications: Preventive visits may provide a key opportunity for obese patients to receive weight-related counseling from their physician”</p> <p><b>Reviewer’s comments:</b><br/>This study shows that female sex, younger age, having severe obesity, and residing in Midwest US were positively associated with obesity diagnosis.</p> <p>This study has clearly met 8/8 (100%) criteria in the critical appraisal tool.</p> |
| <p><b>Authors:</b><br/>Booth, Prevost &amp; Gulliford [66]</p>                                                                                                                                             | <p><b>Sample size:</b><br/>N=67,000</p> <p><b>Inclusion criteria:</b></p> <ul style="list-style-type: none"> <li>Patients who had BMI &gt; 30 kg/m<sup>2</sup> or a READ</li> </ul>                                                                                                                                                                                                                                                                                                                                                                                             | <p><b>1. Factors associated with BMI recording:</b></p> <ul style="list-style-type: none"> <li>Sex</li> <li>Age</li> <li>BMI category</li> <li>Medical code (READ) recorded</li> </ul>                                                                           | <p>BMI records</p>       | <p><b>Statistical analysis:</b></p> <ul style="list-style-type: none"> <li>Descriptive for proportions</li> <li>Poisson regression to estimate Relative Rate Ratio (RRR) for BMI recordings, adjusted for covariates</li> <li>Person-time was used an offset and the regression model was clustered to allow differences in recording between practices</li> </ul>                                                                                                                                                                                                                                                                                                                                                          | <p><b>Author’s conclusions:</b><br/>“Obese patients do not have BMI values recorded regularly. The mean BMI of obese patients, and the proportion gaining weight</p>                                                                                                                                                                                                                                                                                                                                                                                                 |

|                                                                                                                                                                                 |                                                                                                                                                                                                                                                                                                                                                                                                                                                                                                                                                                                      |                                                                                                                                                                                                                                          |                                              |                                                                                                                                                                                                                                                                                                                                                                                                                                                                                                                                                                                                                                                                                                                                                                                                                                                                                                                                                                                                                                                                                                                                                                                                                                                                                   |                                                                                                                                                                                                                                                                                                                                                                                                                                                                                                                                                                                                                                                              |
|---------------------------------------------------------------------------------------------------------------------------------------------------------------------------------|--------------------------------------------------------------------------------------------------------------------------------------------------------------------------------------------------------------------------------------------------------------------------------------------------------------------------------------------------------------------------------------------------------------------------------------------------------------------------------------------------------------------------------------------------------------------------------------|------------------------------------------------------------------------------------------------------------------------------------------------------------------------------------------------------------------------------------------|----------------------------------------------|-----------------------------------------------------------------------------------------------------------------------------------------------------------------------------------------------------------------------------------------------------------------------------------------------------------------------------------------------------------------------------------------------------------------------------------------------------------------------------------------------------------------------------------------------------------------------------------------------------------------------------------------------------------------------------------------------------------------------------------------------------------------------------------------------------------------------------------------------------------------------------------------------------------------------------------------------------------------------------------------------------------------------------------------------------------------------------------------------------------------------------------------------------------------------------------------------------------------------------------------------------------------------------------|--------------------------------------------------------------------------------------------------------------------------------------------------------------------------------------------------------------------------------------------------------------------------------------------------------------------------------------------------------------------------------------------------------------------------------------------------------------------------------------------------------------------------------------------------------------------------------------------------------------------------------------------------------------|
| <p><b>Year published:</b><br/>2013</p> <p><b>Study design:</b><br/>Cohort study</p> <p><b>Country:</b><br/>United Kingdom</p>                                                   | <p>medical diagnosis code indicating obesity</p> <p><b>Exclusion criteria:</b></p> <ul style="list-style-type: none"> <li>Person-time outside the age range of 18-100 years</li> </ul> <p><b>Setting and population:</b></p> <ul style="list-style-type: none"> <li>Records from 127 family practices in UK GPRD which contained EHR from 600 general practices in the United Kingdom, between 1 January 1997 and 31 December 2009</li> </ul>                                                                                                                                        | <ul style="list-style-type: none"> <li>Socio-economic relative deprivation</li> </ul>                                                                                                                                                    |                                              | <p><b>Results/effects estimates:</b></p> <p>Proportion of patients with a BMI recording:</p> <ul style="list-style-type: none"> <li>99.2% of all patients at some point between 1 January 1997 and 31 December 2009.</li> </ul> <p>1. Predictors of BMI recording:</p> <ul style="list-style-type: none"> <li>Sex: Female (RRR: 1.14, Ref male)</li> <li>Age (18-24y RRR: 0.85, 25-34y RRR: 0.65, 35-44y RRR: 0.62, 45-54y RRR: 0.75, 55-64y RRR: 0.87, 75-100y RRR: 0.83, Ref 65-74y)</li> <li>BMI category (obesity class I RRR: 0.78, obesity class III RRR: 1.19, unknown RRR: 0.24, Ref overweight)</li> <li>Medical code recorded: 'yes' (RRR: 1.46, Ref 'no')</li> <li>Smoking status (ex-smoker RRR: 1.22, smoker RRR: 0.93, not known RRR: 0.96, Ref non-smoker)</li> <li>Index of multiple deprivation: IMD Quintile (3 RRR: 1.19, 4 RRR: 1.19, 5 RRR: 1.21, Ref Quintile 1 least deprived)</li> </ul>                                                                                                                                                                                                                                                                                                                                                                  | <p>over time, is increasing. Improved strategies for monitoring and managing obesity are required.”</p> <p><b>Reviewer’s comments:</b></p> <p>This study shows that several socio demographics (aged 65-74 years, female sex, increasing socio-economic deprivation), behavioural factors (former smoking), and obesity class II/III and known BMI were positively associated with BMI recordings.</p> <p>This study has clearly met 9/10 (90%) criteria in the critical appraisal tool.</p>                                                                                                                                                                 |
| <p><b>Authors:</b><br/>Bramlage et al. [67]</p> <p><b>Year published:</b><br/>2004</p> <p><b>Study design:</b><br/>Cross sectional study</p> <p><b>Country:</b><br/>Germany</p> | <p><b>Sample size:</b><br/>N=45,125</p> <p><b>Inclusion criteria:</b></p> <ul style="list-style-type: none"> <li>Patients attending the target day assessment (half day, alternatively September 18 or 20, 2001)</li> </ul> <p><b>Exclusion criteria:</b></p> <ul style="list-style-type: none"> <li>Patients who had a BMI of &lt;18.5 kg/m<sup>2</sup></li> </ul> <p><b>Setting and population:</b></p> <ul style="list-style-type: none"> <li>Records of patients from participating 1912 primary care practices in HYDRA study performed in September 2001 in Germany</li> </ul> | <p><b>1. Factors associated with poor recognition of overweight and obesity:</b></p> <ul style="list-style-type: none"> <li>Age</li> <li>Sex</li> <li>Diagnosis with vascular complications</li> <li>Numbers of comorbidities</li> </ul> | <p>Recognition of overweight and obesity</p> | <p><b>Statistical analysis:</b></p> <ul style="list-style-type: none"> <li>Descriptive for proportions</li> <li>Logistic regression to estimate OR for poor recognition of overweight and obesity, adjusted for covariates</li> </ul> <p><b>Results/effects estimates:</b></p> <p>Proportion of patients with recognition of overweight and obesity by the doctor at the time of survey:</p> <ul style="list-style-type: none"> <li>20-30% of overweight patients had recognition of overweight</li> <li>60-70% of patients with grade 3 obesity had recognition of obesity</li> </ul> <p>1. Predictors of poor recognition of obesity:</p> <ul style="list-style-type: none"> <li>Sex: female (OR: 1.40, Ref male)</li> <li>Age (≥60y OR: 1.60, 40-59y OR: 1.50, Ref 30-40y)</li> <li>Diagnosis with vascular complications: yes (OR: 2.10, Ref no)</li> <li>Comorbid conditions (3-4 OR: 3.40, ≥5 OR: 6.40, Ref none)</li> </ul> <p>2. Predictors of poor recognition of overweight:</p> <ul style="list-style-type: none"> <li>Sex: female (OR: 1.30, Ref male)</li> <li>Age (≥60y OR: 1.90, 40-59y OR: 1.60, Ref 30-40y)</li> <li>Diagnosis with vascular complications: yes (OR: 2.20, Ref no)</li> <li>Comorbid conditions (3-4 OR: 3.30, ≥5 OR: 5.10, Ref none)</li> </ul> | <p><b>Author’s conclusions:</b></p> <p>“Primary care management of overweight and obesity is largely deficient, predominantly due to four interrelated factors: doctors’ poor recognition of patients’ weight status, doctors’ inefficient efforts at intervention, patients’ poor acceptance of such interventions and dissatisfaction with existing life-style modification strategies.”</p> <p><b>Reviewer’s comments:</b></p> <p>This study shows that female sex, older age, having diagnosis with vascular complications and increased number of comorbid conditions were positively associated with poor recognition of obesity by their doctors.</p> |



1  
2  
3  
4  
5  
6  
7  
8  
9  
10  
11  
12  
13  
14  
15  
16  
17  
18  
19  
20  
21  
22  
23  
24  
25  
26  
27  
28  
29  
30  
31  
32  
33  
34  
35  
36  
37  
38  
39  
40  
41  
42  
43  
44  
45  
46

|                                                                                                                                                                                                    |                                                                                                                                                                                                                                                                                                                                                                                                                                                                                                                                                                                                          |                                                                                                                                                                                                                                                                                          |                    |                                                                                                                                                                                                                                                                                                                                                                                                                                                                                                                                                                                                                                                                                                                                                                                                                                                                                                                                                                                                                                               |                                                                                                                                                                                                                                                                                                                                                                                                                                                                                                                                                                                                                                                                                                                                                                                                                                                                                                                                                                                                                                                                   |
|----------------------------------------------------------------------------------------------------------------------------------------------------------------------------------------------------|----------------------------------------------------------------------------------------------------------------------------------------------------------------------------------------------------------------------------------------------------------------------------------------------------------------------------------------------------------------------------------------------------------------------------------------------------------------------------------------------------------------------------------------------------------------------------------------------------------|------------------------------------------------------------------------------------------------------------------------------------------------------------------------------------------------------------------------------------------------------------------------------------------|--------------------|-----------------------------------------------------------------------------------------------------------------------------------------------------------------------------------------------------------------------------------------------------------------------------------------------------------------------------------------------------------------------------------------------------------------------------------------------------------------------------------------------------------------------------------------------------------------------------------------------------------------------------------------------------------------------------------------------------------------------------------------------------------------------------------------------------------------------------------------------------------------------------------------------------------------------------------------------------------------------------------------------------------------------------------------------|-------------------------------------------------------------------------------------------------------------------------------------------------------------------------------------------------------------------------------------------------------------------------------------------------------------------------------------------------------------------------------------------------------------------------------------------------------------------------------------------------------------------------------------------------------------------------------------------------------------------------------------------------------------------------------------------------------------------------------------------------------------------------------------------------------------------------------------------------------------------------------------------------------------------------------------------------------------------------------------------------------------------------------------------------------------------|
|                                                                                                                                                                                                    |                                                                                                                                                                                                                                                                                                                                                                                                                                                                                                                                                                                                          |                                                                                                                                                                                                                                                                                          |                    |                                                                                                                                                                                                                                                                                                                                                                                                                                                                                                                                                                                                                                                                                                                                                                                                                                                                                                                                                                                                                                               | This study has clearly met 7/8 (88%) criteria in the critical appraisal tool. One of the criteria was unclear.                                                                                                                                                                                                                                                                                                                                                                                                                                                                                                                                                                                                                                                                                                                                                                                                                                                                                                                                                    |
| <p><b>Authors:</b><br/>Cuccu, Abi-Aad &amp; Duggal [68]</p> <p><b>Year published:</b><br/>2019</p> <p><b>Study design:</b><br/>Cross sectional study</p> <p><b>Country:</b><br/>United Kingdom</p> | <p><b>Sample size:</b><br/>N=1,154,652</p> <p><b>Inclusion criteria:</b></p> <ul style="list-style-type: none"> <li>• Patients aged 18-100 years</li> <li>• Patients residing in the Kent County Council, who were alive and registered in Kent general practice as of 6 August 2018</li> </ul> <p><b>Exclusion criteria:</b></p> <ul style="list-style-type: none"> <li>• None</li> </ul> <p><b>Setting and population:</b></p> <ul style="list-style-type: none"> <li>• Records of patients from Kent Integrated Dataset in September 2001 in the Kent, UK, between 2015/2016 and 2017/2018</li> </ul> | <p><b>1. Factors associated with null BMI recording</b></p> <ul style="list-style-type: none"> <li>• Sex</li> <li>• Age</li> <li>• Socio-economic relative deprivation</li> <li>• Diagnosis of hypertension</li> <li>• Diagnosis of SMI</li> <li>• Presence of multimorbidity</li> </ul> | Null BMI recording | <p><b>Statistical analysis:</b></p> <ul style="list-style-type: none"> <li>• Descriptive for proportions</li> <li>• Logistic regression to estimate OR for null BMI recording, adjusted for covariates</li> </ul> <p><b>Results/effects estimates:</b><br/>Proportion of patients with a missing BMI between 2015/2016 and 2017/2018:</p> <ul style="list-style-type: none"> <li>• 56.3% had null BMI recorded</li> </ul> <p>1. Predictors of null BMI recording:</p> <ul style="list-style-type: none"> <li>• Sex: Male (OR: 1.58, Ref female)</li> <li>• Age (<math>\geq 95y</math> OR: 1.49, 85-94y OR: 0.90, 75-84y OR: 0.62, 65-74y OR: 0.47, 55-64y OR: 0.49, 45-54y OR: 0.53, 35-44y OR: 0.62, 25-34y OR: 0.66, Ref 18-24y)</li> <li>• Socioeconomic deprivation Quintile (3 OR: 0.97, 4: 0.89, Ref Quintile 1 Least deprived)</li> <li>• Diagnosis of hypertension (OR: 0.76, Ref none)</li> <li>• Diagnosis of SMI (OR: 0.62, Ref none)</li> <li>• Presence of multimorbidity (OR: 0.39, Ref 0 or 1 long term conditions)</li> </ul> | <p><b>Author’s conclusions:</b><br/>“Findings were aligned to previous research using nationally representative samples. Completeness of recording varied by age, sex, deprivation, and comorbidity. Recording within general practice was aligned to chronic disease management. From a prevention perspective, earlier assessment, and intervention for the management of excess weight within primary care may be an opportunity for avoiding increases in BMI trajectory. There may also be merit in recognising that the external disease agents that influence obesity can be controlled or reduced (obesogenic environment) from a national policy perspective. Such a perspective may also help reduce stigmatisation and the pressure around arguments that centre on personal responsibility for obesity.”</p> <p><b>Reviewer’s comments:</b><br/>This study shows that socio demographics (aged 95y and above and male sex) were positively associated with null BMI recording, while being aged 25 to 94y, increasing socio-economic deprivation,</p> |

|                                                                                                                                                                                  |                                                                                                                                                                                                                                                                                                                                                                                                                                                                                                                                                                                                                                                                |                                                                                                                                                                                                                                                                                                                                                                              |                                                                                                      |                                                                                                                                                                                                                                                                                                                                                                                                                                                                                                                                                                                                                                                                                                                                                                                                                                                                                                                                                                                                                                                                                                                                            |                                                                                                                                                                                                                                                                                                                                                                                                                                                                                                                                                                                                                                   |
|----------------------------------------------------------------------------------------------------------------------------------------------------------------------------------|----------------------------------------------------------------------------------------------------------------------------------------------------------------------------------------------------------------------------------------------------------------------------------------------------------------------------------------------------------------------------------------------------------------------------------------------------------------------------------------------------------------------------------------------------------------------------------------------------------------------------------------------------------------|------------------------------------------------------------------------------------------------------------------------------------------------------------------------------------------------------------------------------------------------------------------------------------------------------------------------------------------------------------------------------|------------------------------------------------------------------------------------------------------|--------------------------------------------------------------------------------------------------------------------------------------------------------------------------------------------------------------------------------------------------------------------------------------------------------------------------------------------------------------------------------------------------------------------------------------------------------------------------------------------------------------------------------------------------------------------------------------------------------------------------------------------------------------------------------------------------------------------------------------------------------------------------------------------------------------------------------------------------------------------------------------------------------------------------------------------------------------------------------------------------------------------------------------------------------------------------------------------------------------------------------------------|-----------------------------------------------------------------------------------------------------------------------------------------------------------------------------------------------------------------------------------------------------------------------------------------------------------------------------------------------------------------------------------------------------------------------------------------------------------------------------------------------------------------------------------------------------------------------------------------------------------------------------------|
|                                                                                                                                                                                  |                                                                                                                                                                                                                                                                                                                                                                                                                                                                                                                                                                                                                                                                |                                                                                                                                                                                                                                                                                                                                                                              |                                                                                                      |                                                                                                                                                                                                                                                                                                                                                                                                                                                                                                                                                                                                                                                                                                                                                                                                                                                                                                                                                                                                                                                                                                                                            | diagnosis of hypertension, SMI and presence of multimorbidity were negatively associated with null BMI recording.<br><br>This study has clearly met 8/8 (100%) criteria in the critical appraisal tool.                                                                                                                                                                                                                                                                                                                                                                                                                           |
| <p><b>Authors:</b><br/>Cyr et al. [69]</p> <p><b>Year published:</b><br/>2016</p> <p><b>Study design:</b><br/>Cross sectional study</p> <p><b>Country:</b><br/>United States</p> | <p><b>Sample size:</b><br/>N=6,195</p> <p><b>Inclusion criteria:</b></p> <ul style="list-style-type: none"> <li>• Patients aged <math>\geq 18</math> years</li> <li>• Patients who had a BMI <math>\geq 25</math> kg/m<sup>2</sup></li> </ul> <p><b>Exclusion criteria:</b></p> <ul style="list-style-type: none"> <li>• Patients who were pregnant at the time of visit</li> </ul> <p><b>Setting and population:</b></p> <ul style="list-style-type: none"> <li>• Records of patients from family medicine residency program with two sites (urban and suburban), with 17 faculty and 21 residents in United States between December 2011 and 2013</li> </ul> | <p><b>1. Factors associated with inclusion of obesity and/or overweight in the problem list:</b></p> <ul style="list-style-type: none"> <li>• Sex</li> <li>• Age</li> <li>• Race</li> <li>• Insurance</li> <li>• BMI</li> <li>• Presence of hypertension</li> <li>• Presence of type 2 diabetes</li> <li>• Presence of hyperlipidemia</li> <li>• Numbers of visit</li> </ul> | <p>Overweight/obesity documentation (inclusion of obesity and/or overweight in the problem list)</p> | <p><b>Statistical analysis:</b></p> <ul style="list-style-type: none"> <li>• Descriptive for proportions</li> <li>• Multivariate regression to estimate OR for overweight/obesity documentation, adjusted for covariates</li> </ul> <p><b>Results/effects estimates:</b></p> <p>Proportion of patients with overweight/obesity documentation between December 2011 and 2013:</p> <ul style="list-style-type: none"> <li>• 21.1% had overweight/obesity documentation</li> </ul> <p>1. Predictors of null overweight/obesity documentation:</p> <ul style="list-style-type: none"> <li>• Sex: Female (OR: 1.48, Ref male)</li> <li>• Insurance (Medicaid OR: 0.72, Ref commercial insurance)</li> <li>• BMI (<math>\geq 40</math> kg/m<sup>2</sup> OR: 24.78, 30-<math>&lt;40</math> kg/m<sup>2</sup> OR: 5.36, Ref 25-<math>&lt;30</math> kg/m<sup>2</sup>)</li> <li>• Presence of hypertension: yes (OR: 1.25, Ref no)</li> <li>• Presence of type 2 diabetes: yes (OR: 1.48, Ref no)</li> <li>• Presence of hyperlipidemia: yes (OR: 1.28, Ref no)</li> <li>• Number of visits (<math>\geq 6</math> OR: 1.39, Ref 1-2 visits)</li> </ul> | <p><b>Author's conclusions:</b></p> <p>“Nearly 80% of OW and obese patients were not identified on the problem list. Patient gender, comorbidity, and number of visits were associated with documentation. Future research should examine automatic documentation of OW/obesity on the medical problem list.”</p> <p><b>Reviewer's comments:</b></p> <p>This study shows that female sex, higher BMI, presence of hypertension, type 2 diabetes and dyslipidaemia were positively associated with overweight and obesity documentation.</p> <p>This study has clearly met 8/8 (100%) criteria in the critical appraisal tool.</p> |
| <p><b>Authors:</b><br/>Dalton et al. [70]</p> <p><b>Year published:</b><br/>2011</p> <p><b>Study design:</b><br/>Cross sectional study</p>                                       | <p><b>Sample size:</b><br/>N=21,510</p> <p><b>Inclusion criteria:</b></p> <ul style="list-style-type: none"> <li>• Patients aged 35-74 years during the study period</li> <li>• Patients who had anthropometric measurement taken in last 5 years</li> </ul> <p><b>Exclusion criteria:</b></p>                                                                                                                                                                                                                                                                                                                                                                 | <p><b>1. Factors associated with BMI recording:</b></p> <ul style="list-style-type: none"> <li>• Sex/Age</li> <li>• Ethnicity</li> <li>• Socio-economic relative deprivation</li> <li>• Hypertension</li> </ul>                                                                                                                                                              | <p>BMI records</p>                                                                                   | <p><b>Statistical analysis:</b></p> <ul style="list-style-type: none"> <li>• Descriptive for proportions</li> <li>• Logistic regression to estimate OR for BMI recordings, adjusted for covariates</li> </ul> <p><b>Results/effects estimates:</b></p> <p>Proportion of patients with a BMI recording between December 2008 and January 2009:</p> <ul style="list-style-type: none"> <li>• 72.8% of all patients</li> </ul> <p>1. Predictors of BMI recording:</p>                                                                                                                                                                                                                                                                                                                                                                                                                                                                                                                                                                                                                                                                         | <p><b>Author's conclusions:</b></p> <p>“The workload implications of the NHS Health Checks programme for general practices in England are substantial. There are considerable variations in risk factor recording between practices and between age, gender and ethnic groups.”</p>                                                                                                                                                                                                                                                                                                                                               |

|                                                                                                                                                                                        |                                                                                                                                                                                                                                                                                                                                                                                                                                                                                                                                                                                                                                                                                                                                                                                                                                                                                                                                             |                                                                                                                                                                         |                                            |                                                                                                                                                                                                                                                                                                                                                                                                                                                                                                                                                                                                                                                                                                                                                                                                                                                                                                                                                                                                                                                                                                                                                                                                                                                                                                                                                                                                                                                                                                                                                                                               |                                                                                                                                                                                                                                                                                                                                                                                                                                                                                                                                                                                                                     |
|----------------------------------------------------------------------------------------------------------------------------------------------------------------------------------------|---------------------------------------------------------------------------------------------------------------------------------------------------------------------------------------------------------------------------------------------------------------------------------------------------------------------------------------------------------------------------------------------------------------------------------------------------------------------------------------------------------------------------------------------------------------------------------------------------------------------------------------------------------------------------------------------------------------------------------------------------------------------------------------------------------------------------------------------------------------------------------------------------------------------------------------------|-------------------------------------------------------------------------------------------------------------------------------------------------------------------------|--------------------------------------------|-----------------------------------------------------------------------------------------------------------------------------------------------------------------------------------------------------------------------------------------------------------------------------------------------------------------------------------------------------------------------------------------------------------------------------------------------------------------------------------------------------------------------------------------------------------------------------------------------------------------------------------------------------------------------------------------------------------------------------------------------------------------------------------------------------------------------------------------------------------------------------------------------------------------------------------------------------------------------------------------------------------------------------------------------------------------------------------------------------------------------------------------------------------------------------------------------------------------------------------------------------------------------------------------------------------------------------------------------------------------------------------------------------------------------------------------------------------------------------------------------------------------------------------------------------------------------------------------------|---------------------------------------------------------------------------------------------------------------------------------------------------------------------------------------------------------------------------------------------------------------------------------------------------------------------------------------------------------------------------------------------------------------------------------------------------------------------------------------------------------------------------------------------------------------------------------------------------------------------|
| <p><b>Country:</b><br/>United Kingdom</p>                                                                                                                                              | <ul style="list-style-type: none"> <li>Patients in CVD or diabetes register</li> </ul> <p><b>Setting and population:</b></p> <ul style="list-style-type: none"> <li>Records from 14 general practices participating in the NHS Health Checks programme in Ealing Primary Care Trust (PCT), North West London, between December 2008 and January 2009</li> </ul>                                                                                                                                                                                                                                                                                                                                                                                                                                                                                                                                                                             |                                                                                                                                                                         |                                            | <ul style="list-style-type: none"> <li>Sex/Age (male/65-74y OR: 0.68, male/55-64y OR: 0.55, male/45-54y OR: 0.47, male/35-44y OR: 0.46, Ref female/35-44y)</li> <li>Ethnicity (mixed OR:1.77, missing OR:0.31, Ref White)</li> <li>Socio-economic quintiles: deprivation fifth quintile (2 OR: 1.16, Ref quintile 1)</li> <li>Presence of hypertension: yes (OR:3.23, Ref no)</li> </ul>                                                                                                                                                                                                                                                                                                                                                                                                                                                                                                                                                                                                                                                                                                                                                                                                                                                                                                                                                                                                                                                                                                                                                                                                      | <p><b>Reviewer’s comments:</b><br/>This study shows that female sex, mixed ethnicity, and having hypertension were positively associated with BMI recording.</p> <p>This study has clearly met 8/8 (100%) criteria in the critical appraisal tool.</p>                                                                                                                                                                                                                                                                                                                                                              |
| <p><b>Authors:</b><br/>Emanuel et al. [71]</p> <p><b>Year published:</b><br/>2016</p> <p><b>Study design:</b><br/>“Matched cohort study”</p> <p><b>Country:</b><br/>United Kingdom</p> | <p><b>Sample size:</b><br/>N=14,586 (RA case: 1121, RA control: 4282, IBD case: 1875, IBD control: 7308)</p> <p><b>Inclusion criteria:</b></p> <ul style="list-style-type: none"> <li>Case: Patients diagnosed with Rheumatoid Arthritis (RA) and Inflammatory Bowel Disease (IBD) (including ulcerative colitis and Crohn’s disease) as per READ code on study date</li> <li>Control: Patients matched on age, gender and general practice with randomly sampled from all patients who were disease free</li> <li>Patients registered uninterruptedly</li> <li>with the practice for specified data collection timepoints</li> </ul> <p><b>Exclusion criteria:</b></p> <ul style="list-style-type: none"> <li>None</li> </ul> <p><b>Setting and population:</b></p> <ul style="list-style-type: none"> <li>Records of patients registered with local general practices on study date of 12 January 2014 from Lambeth DataNet, a</li> </ul> | <p><b>1. Factors associated with BMI recording and obesity diagnosis:</b></p> <ul style="list-style-type: none"> <li>Presence of RA</li> <li>Presence of IBD</li> </ul> | <p>BMI recording and obesity diagnosis</p> | <p><b>Statistical analysis:</b></p> <ul style="list-style-type: none"> <li>Descriptive for proportions</li> <li>Conditional Poisson regression to estimate OR for BMI recording at the prespecified time point (1 year before, 1 year after and 5 years after case index date), adjusted for age, gender, ethnicity and deprivation</li> </ul> <p><b>Results/effects estimates:</b></p> <p>Proportion of patients with BMI recording from study time points (from case index date):</p> <ul style="list-style-type: none"> <li>RA case: 13%, 13% and 34% for 1 year before, 1 year after and 5 years after, respectively</li> <li>RA control: 10%, 8% and 28% for 1 year before, 1 year after and 5 years after, respectively</li> <li>IBD case: 8%, 12% and 27% for 1 year before, 1 year after and 5 years after, respectively</li> <li>IBD control: 10%, 8% and 22% for 1 year before, 1 year after and 5 years after, respectively</li> </ul> <p>1. Estimated differences in BMI recording (Ref control group, time duration from case index date):</p> <ul style="list-style-type: none"> <li>Presence of RA: OR: 1.52 and OR: 1.49 for 1 year before and 1 year after, respectively</li> <li>Presence of IBD: OR: 2.24, OR: 1.61 and OR: 1.31 for 1 year before, 1 year after and 5 years after, respectively</li> </ul> <p>2. Estimated differences in obesity diagnosis (Ref control group, time duration from case index date):</p> <ul style="list-style-type: none"> <li>Presence of RA: OR: 1.64 for 1 year after</li> <li>Presence of IBD: OR: 0.77 for 5 years after</li> </ul> | <p><b>Author’s conclusions:</b><br/>“The assessment and treatment of vascular risk in patients with RA and IBD in primary care is suboptimal, particularly with reference to CVD risk score calculation.”</p> <p><b>Reviewer’s comments:</b><br/>This study shows that presence of RA and IBD are positively associated with BMI recording. While the presence of RA is positively associated with obesity diagnosis, the presence of IBD is inversely associated with obesity diagnosis.</p> <p>This study has clearly met 7/8 (88%) criteria in the critical appraisal tool. One of the criteria was unclear.</p> |

|                                                                                                                                                                         |                                                                                                                                                                                                                                                                                                                                                                                                                                                                                                                                                                                                                    |                                                                                                                                                                                                                                                                                                                                                                                                                                                                                                                                                                                                                                                                                                                                                                                                                                                |               |                                                                                                                                                                                                                                                                                                                                                                                                                                                                                                                                                                                                                                                                                                                                                                                                                                                                                                                                                                                                                                 |                                                                                                                                                                                                                                                                                                                                                                                                                                                                                                                                                                                                                                                                                                                                                                                                                                                                                                    |
|-------------------------------------------------------------------------------------------------------------------------------------------------------------------------|--------------------------------------------------------------------------------------------------------------------------------------------------------------------------------------------------------------------------------------------------------------------------------------------------------------------------------------------------------------------------------------------------------------------------------------------------------------------------------------------------------------------------------------------------------------------------------------------------------------------|------------------------------------------------------------------------------------------------------------------------------------------------------------------------------------------------------------------------------------------------------------------------------------------------------------------------------------------------------------------------------------------------------------------------------------------------------------------------------------------------------------------------------------------------------------------------------------------------------------------------------------------------------------------------------------------------------------------------------------------------------------------------------------------------------------------------------------------------|---------------|---------------------------------------------------------------------------------------------------------------------------------------------------------------------------------------------------------------------------------------------------------------------------------------------------------------------------------------------------------------------------------------------------------------------------------------------------------------------------------------------------------------------------------------------------------------------------------------------------------------------------------------------------------------------------------------------------------------------------------------------------------------------------------------------------------------------------------------------------------------------------------------------------------------------------------------------------------------------------------------------------------------------------------|----------------------------------------------------------------------------------------------------------------------------------------------------------------------------------------------------------------------------------------------------------------------------------------------------------------------------------------------------------------------------------------------------------------------------------------------------------------------------------------------------------------------------------------------------------------------------------------------------------------------------------------------------------------------------------------------------------------------------------------------------------------------------------------------------------------------------------------------------------------------------------------------------|
|                                                                                                                                                                         | patient level database of primary care EHR of over 350,000 people residing in Lambeth borough, London, United Kingdom                                                                                                                                                                                                                                                                                                                                                                                                                                                                                              |                                                                                                                                                                                                                                                                                                                                                                                                                                                                                                                                                                                                                                                                                                                                                                                                                                                |               |                                                                                                                                                                                                                                                                                                                                                                                                                                                                                                                                                                                                                                                                                                                                                                                                                                                                                                                                                                                                                                 |                                                                                                                                                                                                                                                                                                                                                                                                                                                                                                                                                                                                                                                                                                                                                                                                                                                                                                    |
| <p><b>Authors:</b><br/>Ghosh [72]</p> <p><b>Year published:</b><br/>2016</p> <p><b>Study design:</b><br/>Cross sectional study</p> <p><b>Country:</b><br/>Australia</p> | <p><b>Sample size:</b><br/>N=118,709</p> <p><b>Inclusion criteria:</b></p> <ul style="list-style-type: none"> <li>• Patients aged <math>\geq 18</math> years</li> </ul> <p><b>Exclusion criteria:</b></p> <ul style="list-style-type: none"> <li>• Patients without a recorded age and/or gender</li> </ul> <p><b>Setting and population:</b></p> <ul style="list-style-type: none"> <li>• Records of patients from 17 general practices in the Sentinel Practices Data Sourcing (SPDS) project in Illawarra Shoalhaven region of New South Wales, Australia between September 2011 and September 2013.</li> </ul> | <p><b>1. Factors associated with BMI recording:</b></p> <ul style="list-style-type: none"> <li>• Age</li> <li>• Sex</li> <li>• Presence of specific medical conditions: hypertension, hyperlipidaemia, musculoskeletal (osteoarthritis, osteoporosis and inflammatory arthritis), mental (bipolar, anxiety and depression), respiratory (asthma and chronic obstructive pulmonary disease), diabetes (type 1 and type 2 diabetes mellitus), cardiovascular (congestive heart disease, myocardial infarction, heart failure, acute coronary syndrome, peripheral vascular disease, left ventricular hypertrophy, atrial fibrillation and carotid stenosis), renal (renal artery stenosis, acute renal failure, chronic renal failure and renal impairment), stroke and cancer (cancer and multiple myeloma)</li> <li>• Disease count</li> </ul> | BMI recording | <p><b>Statistical analysis:</b></p> <ul style="list-style-type: none"> <li>• Descriptive for proportions</li> <li>• Multivariate regression to estimate OR for BMI recording, adjusted for SEIFA-IRSD and covariates</li> </ul> <p><b>Results/effects estimates:</b><br/>Proportion of patients with an anthropometry measurement between September 2011 and September 2013:</p> <ul style="list-style-type: none"> <li>• 30.9% had BMI recording</li> <li>• 8.0% had WC recording</li> </ul> <p>1. Predictors of BMI recording:</p> <ul style="list-style-type: none"> <li>• Age (<math>\geq 75</math>y OR: 1.17, 45-64y OR: 1.25, Ref 18-44y)</li> <li>• Presence of specific medical conditions: (hypertension OR: 1.11, hyperlipidaemia OR: 1.14, musculoskeletal OR: 1.21, mental OR: 0.80, respiratory OR: 0.91, diabetes OR: 1.83, cardiovascular OR: 1.14, renal OR: 1.52, Ref absence of specific medical condition)</li> <li>• Disease count (<math>\geq 3</math> OR: 5.18, 2 OR: 4.12, 1 OR: 2.65, Ref 0)</li> </ul> | <p><b>Author's conclusions:</b><br/>"Recording of measures of obesity and overweight in general practices within regional settings is much lower than optimal. More support and advocacy around weighing patients at all interactions is required for regional general practitioners to increase the weight screening in primary care. These findings have policy-relevant implications for weight management in regional Australia."</p> <p><b>Reviewer's comments:</b><br/>This study shows that older age, presence of hypertension, hyperlipidaemia, musculoskeletal conditions, diabetes, cardiovascular conditions, renal conditions were positively associated with BMI recording. Presence of mental health conditions and respiratory conditions were negatively associated with BMI recording.</p> <p>This study has clearly met 8/8 (100%) criteria in the critical appraisal tool.</p> |

|                                                                                                                                                                                         |                                                                                                                                                                                                                                                                                                                                                                                                                                                                                                                                                           |                                                                                                                                                                                                                                                                                                                                                                                                                                                           |                                        |                                                                                                                                                                                                                                                                                                                                                                                                                                                                                                                                                                                                                                                                                                                                                                        |                                                                                                                                                                                                                                                                                                                                                                                                                                                                                                                                                               |
|-----------------------------------------------------------------------------------------------------------------------------------------------------------------------------------------|-----------------------------------------------------------------------------------------------------------------------------------------------------------------------------------------------------------------------------------------------------------------------------------------------------------------------------------------------------------------------------------------------------------------------------------------------------------------------------------------------------------------------------------------------------------|-----------------------------------------------------------------------------------------------------------------------------------------------------------------------------------------------------------------------------------------------------------------------------------------------------------------------------------------------------------------------------------------------------------------------------------------------------------|----------------------------------------|------------------------------------------------------------------------------------------------------------------------------------------------------------------------------------------------------------------------------------------------------------------------------------------------------------------------------------------------------------------------------------------------------------------------------------------------------------------------------------------------------------------------------------------------------------------------------------------------------------------------------------------------------------------------------------------------------------------------------------------------------------------------|---------------------------------------------------------------------------------------------------------------------------------------------------------------------------------------------------------------------------------------------------------------------------------------------------------------------------------------------------------------------------------------------------------------------------------------------------------------------------------------------------------------------------------------------------------------|
| <p><b>Authors:</b><br/>Gonzalez-Chica et al. [73]</p> <p><b>Year published:</b><br/>2019</p> <p><b>Study design:</b><br/>Cross sectional study</p> <p><b>Country:</b><br/>Australia</p> | <p><b>Sample size:</b><br/>N=2,384</p> <p><b>Inclusion criteria:</b></p> <ul style="list-style-type: none"> <li>• Patients aged ≥35 years</li> </ul> <p><b>Exclusion criteria:</b></p> <ul style="list-style-type: none"> <li>• Patients with a terminal illness or a mental incapacity</li> <li>• Patients who are unable to speak English</li> </ul> <p><b>Setting and population:</b></p> <ul style="list-style-type: none"> <li>• Data of Health Omnibus Survey 2017 conducted in South Australia between September 2017 and December 2017</li> </ul> | <p><b>1. Factors associated with weight and/or waist measurement (self-reported):</b></p> <ul style="list-style-type: none"> <li>• Presence of cardiometabolic risk factor (body mass index ≥30 kg/m<sup>2</sup>, hypertension, diabetes and/or dyslipidaemia, but without cardiovascular diseases)</li> <li>• Presence of cardiovascular disease (heart attack, angina, heart failure, and/or stroke, with or without metabolic risk factors)</li> </ul> | <p>Weight and/or waist measurement</p> | <p><b>Statistical analysis:</b></p> <ul style="list-style-type: none"> <li>• Maximum likelihood estimates (pseudolikelihood log) and Wald tests for heterogeneity and trend were used to estimate predicted prevalence, adjusted for covariates (not relevant to calculated PR below).</li> </ul> <p><b>Results/effects estimates:</b></p> <p>1. Predicted adjusted prevalence of weight and/or waist measurement by their GP in the last 12 months:</p> <ul style="list-style-type: none"> <li>• Presence of cardiometabolic risk factor: Yes (Calculated PR*: 1.43, Ref none)</li> <li>• Presence of cardiovascular disease: Yes (Calculated PR*: 1.81, Ref none)</li> </ul>                                                                                         | <p><b>Author’s conclusions:</b></p> <p>“More frequent and comprehensive CVD-related assessments by GPs were more important in promoting a healthier lifestyle than the presence of CVD or cardiometabolic risk factors by themselves.”</p> <p><b>Reviewer’s comments:</b></p> <p>This study shows higher prevalence of weight and/or waist measurement in patients with self-reported cardiometabolic risk factors and cardiovascular disease.</p> <p>This study has clearly met 8/8 (100%) criteria in the critical appraisal tool.</p>                      |
| <p><b>Authors:</b><br/>Gutiérrez Angulo et al. [74]</p> <p><b>Year published:</b><br/>2014</p> <p><b>Study design:</b><br/>Cross sectional study</p> <p><b>Country:</b><br/>Spain</p>   | <p><b>Sample size:</b><br/>N=620</p> <p><b>Inclusion criteria:</b></p> <ul style="list-style-type: none"> <li>• Patients aged &gt;14 years#</li> </ul> <p><b>Exclusion criteria:</b></p> <ul style="list-style-type: none"> <li>• None</li> </ul> <p><b>Setting and population:</b></p> <ul style="list-style-type: none"> <li>• Records of 620 patients randomly selected from 63,820 patients assigned to 3 participating primary care centres in the province of Gipuzkoa, Spain between January 2012 to January 2013</li> </ul>                       | <p><b>1. Factors associated with BMI recording:</b></p> <ul style="list-style-type: none"> <li>• Presence of comorbid conditions (such as diabetes mellitus, hypertension, hyperlipidaemia, coronary ischemia, congestive heart failure, stroke, sleep apnoea syndrome, peripheral venous insufficiency, and hypothyroidism)</li> </ul>                                                                                                                   | <p>BMI recording</p>                   | <p><b>Statistical analysis:</b></p> <ul style="list-style-type: none"> <li>• Descriptive for proportions</li> <li>• Chi-square test or a Fisher’s test to find association of the variable with the BMI recording (not relevant to calculated RR below).</li> </ul> <p><b>Results/effects estimates:</b></p> <p>Proportion of patients with an anthropometry measurement between January 2012 to January 2013:</p> <ul style="list-style-type: none"> <li>• 28% had weight recording</li> <li>• 27% had BMI recording</li> <li>• 0.2% had WC recording</li> <li>• 6% had obesity recording</li> </ul> <p>1. Factors associated with BMI recording:</p> <ul style="list-style-type: none"> <li>• Presence of comorbidity: Yes (Calculated RR*: 3.10, Ref No)</li> </ul> | <p><b>Author’s conclusions:</b></p> <p>“This study confirmed that prevalence of obesity is underestimated, mainly because it is inadequately recorded in clinical histories; that prevalence increases in the presence of other risk factors; and that there is a significant variability in data collection between healthcare professionals.”</p> <p><b>Reviewer’s comments:</b></p> <p>This study shows that presence of comorbidity is positively associated with BMI recording.</p> <p>This study has clearly met 4/8 (50%) criteria in the critical</p> |

|                                                                                                                                                                                     |                                                                                                                                                                                                                                                                                                                                                                                                                                                                                                                                          |                                                                                                                                                                                                                                                                                                                                          |                       |                                                                                                                                                                                                                                                                                                                                                                                                                                                                                                                                                                                                                                                                                                                                                                              |                                                                                                                                                                                                                                                                                                                                                                                                                                                                                                                                                                                                                                                                                                                 |
|-------------------------------------------------------------------------------------------------------------------------------------------------------------------------------------|------------------------------------------------------------------------------------------------------------------------------------------------------------------------------------------------------------------------------------------------------------------------------------------------------------------------------------------------------------------------------------------------------------------------------------------------------------------------------------------------------------------------------------------|------------------------------------------------------------------------------------------------------------------------------------------------------------------------------------------------------------------------------------------------------------------------------------------------------------------------------------------|-----------------------|------------------------------------------------------------------------------------------------------------------------------------------------------------------------------------------------------------------------------------------------------------------------------------------------------------------------------------------------------------------------------------------------------------------------------------------------------------------------------------------------------------------------------------------------------------------------------------------------------------------------------------------------------------------------------------------------------------------------------------------------------------------------------|-----------------------------------------------------------------------------------------------------------------------------------------------------------------------------------------------------------------------------------------------------------------------------------------------------------------------------------------------------------------------------------------------------------------------------------------------------------------------------------------------------------------------------------------------------------------------------------------------------------------------------------------------------------------------------------------------------------------|
|                                                                                                                                                                                     |                                                                                                                                                                                                                                                                                                                                                                                                                                                                                                                                          |                                                                                                                                                                                                                                                                                                                                          |                       |                                                                                                                                                                                                                                                                                                                                                                                                                                                                                                                                                                                                                                                                                                                                                                              | appraisal tool. One of the criteria was unclear.                                                                                                                                                                                                                                                                                                                                                                                                                                                                                                                                                                                                                                                                |
| <p><b>Authors:</b><br/>Mattar et al. [75]</p> <p><b>Year published:</b><br/>2017</p> <p><b>Study design:</b><br/>Cross-sectional study</p> <p><b>Country:</b><br/>United states</p> | <p><b>Sample size:</b><br/>N= 3,868</p> <p><b>Inclusion criteria:</b></p> <ul style="list-style-type: none"> <li>Adults aged 18 years and older with two or more visits during the study window</li> </ul> <p><b>Exclusion criteria:</b></p> <ul style="list-style-type: none"> <li>Children and pregnant women</li> </ul> <p><b>Setting and population:</b></p> <ul style="list-style-type: none"> <li>Patient EMR gathered through routine care at the Wichita Falls Family Medicine Clinic during June 2012 and June 2015.</li> </ul> | <p><b>Factors associated with BMI documentation</b></p> <ul style="list-style-type: none"> <li>Age</li> <li>Sex</li> <li>Race</li> <li>Type of insurance</li> <li>BMI</li> <li>Morbid obesity (BMI <math>\geq</math> 40)</li> <li>Total number of comorbidities</li> </ul>                                                               | Obesity documentation | <p><b>Statistical analysis:</b></p> <ul style="list-style-type: none"> <li>Descriptive statistics for proportions</li> <li>Logistic regression to estimate OR for obesity documentation, adjusted for covariates.</li> </ul> <p><b>Results/effects estimates:</b><br/>Proportion of patients had obesity documented during June 2012 and June 2015:</p> <ul style="list-style-type: none"> <li>102 (35.3%) had their BMI calculated and documented</li> </ul> <p>1. Predictors of obesity documentation:</p> <ul style="list-style-type: none"> <li>Age (OR: 0.97) (continuous)</li> <li>Female 0.58 (OR: 0.58, Ref male)</li> <li>Morbid obesity (BMI <math>\geq</math> 40) (OR: 1.60, Ref BMI &lt; 40)</li> <li>Number of Comorbidities (OR: 1.33) (continuous)</li> </ul> | <p><b>Author's conclusions:</b><br/>"Based on EHR documentation, obesity is under coded and generally not identified as a significant problem in primary care. Physicians are more likely to document obesity in the patient record for those with higher BMI scores who are morbidly obese. Moreover, physicians more frequently provide exercise than diet counseling for the documented obese."</p> <p><b>Reviewer's comments:</b><br/>This study shows that decreasing age, male sex, morbid obesity BMI <math>\geq</math> 40, and number of comorbidities were positively associated with obesity documentation.</p> <p>This study has clearly met 8/8 (100%) criteria in the critical appraisal tool.</p> |
| <p><b>Authors:</b><br/>Melamed et al. [76]</p> <p><b>Year published:</b><br/>2009</p> <p><b>Study design:</b><br/>Cross-sectional study</p> <p><b>Country:</b><br/>Israel</p>       | <p><b>Sample size:</b><br/>N= 289</p> <p><b>Inclusion criteria:</b></p> <ul style="list-style-type: none"> <li>Patients scheduled to see a participating physician (at least 1-year tenure in the family practice and at least a year-long rapport with the patients)</li> <li>Patients who had medical insurance coverage by CHS</li> </ul> <p><b>Exclusion criteria:</b></p>                                                                                                                                                           | <p><b>Factors associated with BMI documentation</b></p> <ul style="list-style-type: none"> <li>Education level</li> <li>Residence</li> <li>Sex</li> <li>Smoking</li> <li>Physical activity</li> <li>Comorbidities</li> <li>Chronic medication use</li> <li>The number of medical encounters in the past 6 months</li> <li>BMI</li> </ul> | BMI documentation     | <p><b>Statistical analysis:</b></p> <ul style="list-style-type: none"> <li>Descriptive statistics for proportions</li> <li>Logistic regression to estimate OR for BMI documentation, adjusted for covariates.</li> </ul> <p><b>Results/effects estimates:</b><br/>Proportion of patients that had their BMI calculated and documented during January 2004 (n=289):</p> <ul style="list-style-type: none"> <li>102 (35.3%) had their BMI calculated and documented</li> </ul> <p>1. Predictors of BMI documentation:</p> <ul style="list-style-type: none"> <li>Age (<math>\geq</math> 55y OR: 2.77, Ref &lt; 55y)</li> <li>Obesity (BMI <math>\geq</math> 30.0kg/m<sup>2</sup>) (OR: 2.04, Ref no)</li> </ul>                                                                | <p><b>Author's conclusions:</b><br/>"Family physicians failed to identify most obese and overweight patients, as seen by lack of BMI documentation and concordant diagnoses in the medical problem list. Determination of BMI by physicians in family practice is of utmost importance, and its incorporation into medical care should be optimized."</p> <p><b>Reviewer's comments:</b></p>                                                                                                                                                                                                                                                                                                                    |

|                                                                                                                                                                                       |                                                                                                                                                                                                                                                                                                                                                                                                                                                                                                                                                                                                                                                                                                                                                                                                                                        |                                                                                                                                                                                                                                                                                                                                                                                                                                                                                                                                                                                                                                                                                                                                                                                                                                  |                                           |                                                                                                                                                                                                                                                                                                                                                                                                                                                                                                                                                                                                                                                                                                                                                                                                                                                                                                                                                                                                                                                                                                                                                                                                                                                                                                                                                                                                                                                                                                                                                                                                                                                                                              |                                                                                                                                                                                                                                                                                                                                                                                                                                                                                                                                                                                                                                                                                                                                                   |
|---------------------------------------------------------------------------------------------------------------------------------------------------------------------------------------|----------------------------------------------------------------------------------------------------------------------------------------------------------------------------------------------------------------------------------------------------------------------------------------------------------------------------------------------------------------------------------------------------------------------------------------------------------------------------------------------------------------------------------------------------------------------------------------------------------------------------------------------------------------------------------------------------------------------------------------------------------------------------------------------------------------------------------------|----------------------------------------------------------------------------------------------------------------------------------------------------------------------------------------------------------------------------------------------------------------------------------------------------------------------------------------------------------------------------------------------------------------------------------------------------------------------------------------------------------------------------------------------------------------------------------------------------------------------------------------------------------------------------------------------------------------------------------------------------------------------------------------------------------------------------------|-------------------------------------------|----------------------------------------------------------------------------------------------------------------------------------------------------------------------------------------------------------------------------------------------------------------------------------------------------------------------------------------------------------------------------------------------------------------------------------------------------------------------------------------------------------------------------------------------------------------------------------------------------------------------------------------------------------------------------------------------------------------------------------------------------------------------------------------------------------------------------------------------------------------------------------------------------------------------------------------------------------------------------------------------------------------------------------------------------------------------------------------------------------------------------------------------------------------------------------------------------------------------------------------------------------------------------------------------------------------------------------------------------------------------------------------------------------------------------------------------------------------------------------------------------------------------------------------------------------------------------------------------------------------------------------------------------------------------------------------------|---------------------------------------------------------------------------------------------------------------------------------------------------------------------------------------------------------------------------------------------------------------------------------------------------------------------------------------------------------------------------------------------------------------------------------------------------------------------------------------------------------------------------------------------------------------------------------------------------------------------------------------------------------------------------------------------------------------------------------------------------|
|                                                                                                                                                                                       | <ul style="list-style-type: none"> <li>Patients who were pregnant, younger than 18 years, or not fluent in Hebrew</li> </ul> <p><b>Setting and population:</b></p> <ul style="list-style-type: none"> <li>Records from 7 urban family practices of CHS in Israel affiliated with the Department of Family Medicine at Tel Aviv University during January 2004.</li> </ul>                                                                                                                                                                                                                                                                                                                                                                                                                                                              |                                                                                                                                                                                                                                                                                                                                                                                                                                                                                                                                                                                                                                                                                                                                                                                                                                  |                                           | <ul style="list-style-type: none"> <li>Diabetes mellitus (OR: 4.35, Ref no)</li> <li>Hypertension (OR: 3.20, Ref no)</li> <li>Chronic medication use (OR: 3.44, Ref no)</li> </ul>                                                                                                                                                                                                                                                                                                                                                                                                                                                                                                                                                                                                                                                                                                                                                                                                                                                                                                                                                                                                                                                                                                                                                                                                                                                                                                                                                                                                                                                                                                           | <p>This study shows that older age (<math>\geq 55y</math>), having obesity, diabetes mellitus, hypertension, and chronic medication use were positively associated with BMI documentation.</p> <p>This study has clearly met 8/8 (100%) criteria in the critical appraisal tool.</p>                                                                                                                                                                                                                                                                                                                                                                                                                                                              |
| <p><b>Authors:</b><br/>Mocarski et al. [77]</p> <p><b>Year published:</b><br/>2018</p> <p><b>Study design:</b><br/>Cross-sectional study</p> <p><b>Country:</b><br/>United states</p> | <p><b>Sample size:</b><br/>N=5,512,285</p> <p><b>Inclusion criteria:</b></p> <ul style="list-style-type: none"> <li>Patients aged <math>\geq 20</math> years on index date and had available BMI measurement in the Quintiles EMR</li> <li>Patients had at least 3 months of follow-up data after the first recorded BMI</li> <li>Study group: ICD-9 coded patients with overweight and obesity</li> <li>Comparison group: non-coded patients</li> </ul> <p><b>Exclusion criteria:</b></p> <ul style="list-style-type: none"> <li>Pregnancy or gestational diabetes</li> </ul> <p><b>Setting and population:</b></p> <ul style="list-style-type: none"> <li>Records from 1300 sites and 49 states in United States from US primary care EHR database and the Quintile EMR database between 1 January 2014 and 30 June 2014.</li> </ul> | <p><b>Factors associated with receiving ICD-9 code for overweight or obesity:</b></p> <ul style="list-style-type: none"> <li>Age</li> <li>Sex</li> <li>Race</li> <li>CCI Category</li> <li>Comorbidities: <ul style="list-style-type: none"> <li>Prader Willi Syndrome</li> <li>Metabolic Syndrome</li> <li>Sleep Apnea</li> <li>Prediabetes</li> <li>NAFLD</li> <li>Cushing Syndrome</li> <li>Vitamin D Deficiency</li> <li>Type 2 diabetes mellitus</li> <li>Hypertension</li> <li>Dyslipidemia</li> <li>Depression</li> <li>Gallbladder Disease</li> <li>Osteoarthritis</li> <li>Feeding Difficulties</li> <li>Dyspepsia</li> <li>Cardiovascular disease</li> <li>Chronic Kidney Disease</li> <li>Malignancy</li> <li>Acute/Chronic Pancreatitis</li> <li>Inflammatory Bowel Disease</li> <li>Anorexia</li> </ul> </li> </ul> | <p>ICD-9 codes for overweight/obesity</p> | <p><b>Statistical analysis:</b></p> <ul style="list-style-type: none"> <li>Descriptive for proportions</li> <li>Logistic regression to estimate OR for being coded as with obesity and overweight as per ICD-9 code for overweight or obesity, adjusted for covariates</li> </ul> <p><b>Results/effects estimates:</b></p> <p>Proportions of patients who had ICD-9 codes for overweight or obesity between January 2014 and June 2014:</p> <ul style="list-style-type: none"> <li>15.1% of all patients (n = 833,763)</li> </ul> <p>1. Predictors of being coded for obesity in patients with BMI <math>\geq 30\text{kg/m}^2</math> (N=2,332,214)</p> <ul style="list-style-type: none"> <li>Age (20–44y OR: 1.94, 45–64y OR: 1.46, Ref <math>\geq 60y</math>)</li> <li>Sex: Female (OR: 1.34, Ref male)</li> <li>Race: (Asian OR: 0.99, Black OR: 1.44, Hispanic OR: 1.69, Native American OR: 2.17, Multi race OR: 1.80, other race OR: 1.05, Ref White)</li> <li>CCI Category: (1 OR: 1.23, 2 OR: 1.24, 3 OR: 1.42, 4 OR: 1.59, <math>\geq 5</math> OR: 1.71, Ref 0)</li> <li>Comorbidities (Prader Willi Syndrome OR: 2.25, metabolic syndrome OR: 2.19, sleep apnea OR: 2.16, prediabetes OR: 1.52, NAFLD OR: 1.52, Cushing syndrome OR: 1.37, vitamin D deficiency OR: 1.33, type 2 diabetes mellitus OR: 1.24, hypertension OR: 1.24, dyslipidemia OR: 1.21, depression OR: 1.23, gallbladder disease OR: 1.17, osteoarthritis OR: 1.08, cardiovascular disease OR: 0.93, chronic kidney disease OR: 0.91, malignancy OR: 0.87, acute/chronic pancreatitis OR: 0.81, inflammatory bowel disease OR: 0.74, anorexia OR: 0.74, HIV OR: 0.67, Ref 'no' for each comorbidity)</li> </ul> | <p><b>Author's conclusions:</b></p> <p>“US outpatients with overweight or obesity are not being reliably coded, making ICD-9 codes undependable sources for determining obesity prevalence and outcomes. BMI data available within EHR databases offer a more accurate and objective means of classifying overweight/obese status.”</p> <p><b>Reviewer's comments:</b></p> <p>This study shows younger age (20–44y and 45–64y), female sex, increasing CCI category, and a few comorbidities were positively associated while except cardiovascular disease, malignancy, acute/chronic pancreatitis, inflammatory bowel disease, anorexia, and HIV were negatively associated with identification of overweight or obesity using ICD-9 codes.</p> |

|                                                                                                                                                                               |                                                                                                                                                                                                                                                                                                                                                                                                                                                                                                                                                                                                                                                                                                                                                                                                                                                                                                       |                                                                                                                                                                                                                                                                                                                                                                                                                                                                                                                                                                                   |                |                                                                                                                                                                                                                                                                                                                                                                                                                                                                                                                                                                                                                                                                                                                                                                                                                                                                                                                                                                                                                                                                                                                                                                                                                                                                                                                                                                                                                                                                                                                                                                                                                                                                                                                                                                                                                                                                                                                                                                                                                                 |                                                                                                                                                                                                                                                                                                                                                                                                                                                                                                                                                                                                                                                                                                                                                                                                                                                                                            |
|-------------------------------------------------------------------------------------------------------------------------------------------------------------------------------|-------------------------------------------------------------------------------------------------------------------------------------------------------------------------------------------------------------------------------------------------------------------------------------------------------------------------------------------------------------------------------------------------------------------------------------------------------------------------------------------------------------------------------------------------------------------------------------------------------------------------------------------------------------------------------------------------------------------------------------------------------------------------------------------------------------------------------------------------------------------------------------------------------|-----------------------------------------------------------------------------------------------------------------------------------------------------------------------------------------------------------------------------------------------------------------------------------------------------------------------------------------------------------------------------------------------------------------------------------------------------------------------------------------------------------------------------------------------------------------------------------|----------------|---------------------------------------------------------------------------------------------------------------------------------------------------------------------------------------------------------------------------------------------------------------------------------------------------------------------------------------------------------------------------------------------------------------------------------------------------------------------------------------------------------------------------------------------------------------------------------------------------------------------------------------------------------------------------------------------------------------------------------------------------------------------------------------------------------------------------------------------------------------------------------------------------------------------------------------------------------------------------------------------------------------------------------------------------------------------------------------------------------------------------------------------------------------------------------------------------------------------------------------------------------------------------------------------------------------------------------------------------------------------------------------------------------------------------------------------------------------------------------------------------------------------------------------------------------------------------------------------------------------------------------------------------------------------------------------------------------------------------------------------------------------------------------------------------------------------------------------------------------------------------------------------------------------------------------------------------------------------------------------------------------------------------------|--------------------------------------------------------------------------------------------------------------------------------------------------------------------------------------------------------------------------------------------------------------------------------------------------------------------------------------------------------------------------------------------------------------------------------------------------------------------------------------------------------------------------------------------------------------------------------------------------------------------------------------------------------------------------------------------------------------------------------------------------------------------------------------------------------------------------------------------------------------------------------------------|
|                                                                                                                                                                               |                                                                                                                                                                                                                                                                                                                                                                                                                                                                                                                                                                                                                                                                                                                                                                                                                                                                                                       | <ul style="list-style-type: none"> <li>• HIV</li> <li>• Cachexia</li> </ul>                                                                                                                                                                                                                                                                                                                                                                                                                                                                                                       |                |                                                                                                                                                                                                                                                                                                                                                                                                                                                                                                                                                                                                                                                                                                                                                                                                                                                                                                                                                                                                                                                                                                                                                                                                                                                                                                                                                                                                                                                                                                                                                                                                                                                                                                                                                                                                                                                                                                                                                                                                                                 | This study has clearly met 8/8 (100%) criteria in the critical appraisal tool.                                                                                                                                                                                                                                                                                                                                                                                                                                                                                                                                                                                                                                                                                                                                                                                                             |
| <p><b>Authors:</b><br/>Nicolson et al. [78]</p> <p><b>Year published:</b><br/>2019</p> <p><b>Study design:</b><br/>Cohort study</p> <p><b>Country:</b><br/>United Kingdom</p> | <p><b>Sample size:</b><br/>N=4,918,746</p> <p><b>Inclusion criteria:</b></p> <ul style="list-style-type: none"> <li>• Patients aged <math>\geq 18</math> years before or during the study period</li> <li>• <math>\geq 1</math> day of research quality registration (registration at a practice with continuous data reporting deemed fit)</li> <li>• <math>\geq 1</math> face-to-face consultation with an HCP</li> <li>• Eligible for linkage to the NCRAS cancer registry data, practice and patient level IMD data and ONS mortality data</li> </ul> <p><b>Exclusion criteria:</b><br/>None</p> <p><b>Setting and population:</b></p> <ul style="list-style-type: none"> <li>• Records from Clinical Practice Research Datalink GOLD database between 1 January 2000 and 31 December 2017, an ongoing primary care database of anonymised EHR data covering 6.9% of the UK population</li> </ul> | <p><b>1. Clinical encounter:</b></p> <ul style="list-style-type: none"> <li>• Clinical event</li> <li>• Staff role</li> </ul> <p><b>2. Factors associated with (a) any weight measurement and (b) repeat weight measurements:</b></p> <ul style="list-style-type: none"> <li>• Sex</li> <li>• Age</li> <li>• BMI</li> <li>• Socio-economic quintiles</li> <li>• Smoking status</li> <li>• Drinking status</li> <li>• Comorbidities</li> <li>• Ethnicity</li> <li>• Pregnancy, endocrine, digestive, and cardiovascular complaints</li> <li>• Frequency of consultation</li> </ul> | Weight records | <p><b>Statistical analysis:</b></p> <ul style="list-style-type: none"> <li>• Descriptive for proportions</li> <li>• Mixed effect negative binomial regression to estimate incident rate ratio (IRR) for a weight measurement and Cox models to estimate hazard ratios (HR) for repeat weight measurement, adjusted for covariates (list all in the sup table)</li> </ul> <p><b>Results/effects estimates:</b><br/>Proportion of patients with a weight recording between 1 January 2000 and 31 December 2017:</p> <ul style="list-style-type: none"> <li>• 68.6% had at least one recording</li> <li>• 49.2% had repeat measurement within a year</li> </ul> <p>1. Clinical factors:</p> <ul style="list-style-type: none"> <li>• Same day as a chronic disease review (16.4%)</li> <li>• Lifestyle advice (10.4%)</li> <li>• Contraception consultation (10.3%)</li> <li>• Health check (6.2%)</li> <li>• Medication review (6.1%)</li> <li>• Practice registration (2.1%)</li> </ul> <p>2 (a). Predictors of any weight measurement:</p> <ul style="list-style-type: none"> <li>• Sex: Female (IRR: 1.30, Ref male)</li> <li>• Age (80-89y IRR: 0.99, 60-69y IRR: 1.11, 30-39y IRR: 0.91, Ref 18-29y)</li> <li>• BMI (&lt;18.5 kg/m<sup>2</sup> IRR: 1.17, 25-29.99 kg/m<sup>2</sup> IRR: 1.12, 30-34.99 kg/m<sup>2</sup> IRR: 1.38, &gt;35 kg/m<sup>2</sup> IRR: 1.67, Ref 18.5-24.99 kg/m<sup>2</sup>)</li> <li>• Socio-economic quintiles: IMD Quintile (II IRR: 1.03, III IRR: 1.08, IV IRR: 1.17, V IRR: 1.22, Ref IMD Quintile I)</li> <li>• Number of comorbidities (1 IRR: 1.13, 2 IRR: 1.35, 3 IRR: 1.52, 4 IRR: 1.67, 5 IRR: 1.82, Ref 0 comorbidity)</li> <li>• Ethnic groups (Indian IRR: 1.25, African IRR: 1.24, Ref White)</li> </ul> <p>2 (b). Predictors of repeat weight measurement:</p> <ul style="list-style-type: none"> <li>• Sex: Female (HR 1.30, Ref male)</li> <li>• Ex-smoker (HR 1.09, Ref non-smoker)</li> <li>• Age (80-89y HR: 1.21, 60-69y HR: 1.34, 30-39y HR: 0.90, Ref 18-29y)</li> </ul> | <p><b>Author's conclusions:</b><br/>"Weight recording is not a routine activity in UK primary care. It is recorded for around a third of patients each year and is repeated on average every 2 years for these patients. It is more common in females with higher BMI and in those with comorbidity. Incentive payments and their removal appear to be associated with increases and decreases in weight recording."</p> <p><b>Reviewer's comments:</b><br/>This study shows that several socio demographics (older age, female sex, ethnic minorities, and increasing socio-economic deprivation), behavioural (former smoking), pregnancy, and increasing number of chronic medical conditions were positively associated with one or more weight recordings.</p> <p>This study has clearly met 7/10 (70%) criteria in the critical appraisal tool. Two of the criteria was unclear.</p> |



|                                                                                                                                                                             |                                                                                                                                                                                                                                                                                                                                                                                                                                                                                                                                                                                                                                                                                                                                                                                                                                                                                                      |                                                                                                                                           |                   |                                                                                                                                                                                                                                                                                                                                                                                                                                                                                                                                                                                                                                                                                                                                                                                                                                                                                        |                                                                                                                                                                                                                                                                                                                                                                                                                                                                                                                                                                                                                                                                           |
|-----------------------------------------------------------------------------------------------------------------------------------------------------------------------------|------------------------------------------------------------------------------------------------------------------------------------------------------------------------------------------------------------------------------------------------------------------------------------------------------------------------------------------------------------------------------------------------------------------------------------------------------------------------------------------------------------------------------------------------------------------------------------------------------------------------------------------------------------------------------------------------------------------------------------------------------------------------------------------------------------------------------------------------------------------------------------------------------|-------------------------------------------------------------------------------------------------------------------------------------------|-------------------|----------------------------------------------------------------------------------------------------------------------------------------------------------------------------------------------------------------------------------------------------------------------------------------------------------------------------------------------------------------------------------------------------------------------------------------------------------------------------------------------------------------------------------------------------------------------------------------------------------------------------------------------------------------------------------------------------------------------------------------------------------------------------------------------------------------------------------------------------------------------------------------|---------------------------------------------------------------------------------------------------------------------------------------------------------------------------------------------------------------------------------------------------------------------------------------------------------------------------------------------------------------------------------------------------------------------------------------------------------------------------------------------------------------------------------------------------------------------------------------------------------------------------------------------------------------------------|
|                                                                                                                                                                             |                                                                                                                                                                                                                                                                                                                                                                                                                                                                                                                                                                                                                                                                                                                                                                                                                                                                                                      |                                                                                                                                           |                   | <ul style="list-style-type: none"> <li>BMI (&lt;18.5 kg/m<sup>2</sup> HR: 1.22, 25-29.99 kg/m<sup>2</sup> HR: 1.11, 30-34.99 kg/m<sup>2</sup> HR: 1.36, &gt;35 kg/m<sup>2</sup> HR: 1.69, Ref 18.5-24.99 kg/m<sup>2</sup>)</li> <li>Socio-economic quintiles: IMD Quintile (II HR: 1.03, III HR: 1.05, IV HR: 1.10, V HR: 1.16, Unknown HR:0.94, Ref IMD Quintile I)</li> <li>Number of comorbidities (1 HR: 1.27, 2 HR: 1.46, 3 HR: 1.60, 4 HR 1.71, 5 HR: 1.85, Ref 0 comorbidity)</li> </ul>                                                                                                                                                                                                                                                                                                                                                                                        |                                                                                                                                                                                                                                                                                                                                                                                                                                                                                                                                                                                                                                                                           |
| <p><b>Authors:</b><br/>Osborn et al. [79]</p> <p><b>Year published:</b><br/>2011</p> <p><b>Study design:</b><br/>Cohort study</p> <p><b>Country:</b><br/>United Kingdom</p> | <p><b>Sample size:</b><br/>N=18,696 (with SMI) and 95,512 (without SMI)</p> <p><b>Inclusion criteria:</b></p> <ul style="list-style-type: none"> <li>Patients aged ≥18 years before or during the study period with at least 6 months of follow up data</li> <li>Study group: patients who had SMI diagnosis based on the READ code list</li> <li>Comparison group: patients who did not have a SMI diagnosis</li> </ul> <p><b>Exclusion criteria:</b></p> <ul style="list-style-type: none"> <li>Patients with pre-existing CVD and patients who registered but had no further record of attendance at the practice</li> </ul> <p><b>Setting and population:</b></p> <ul style="list-style-type: none"> <li>Records from practices which had reached pre-defined THIN Quality Standard contributing to the primary care databases THIN in the UK, between January 2000 and December 2007</li> </ul> | <p><b>1. Factors associated with screening of BMI:</b></p> <ul style="list-style-type: none"> <li>Presence of SMI</li> <li>Age</li> </ul> | Screened for BMI  | <p><b>Statistical analysis:</b></p> <ul style="list-style-type: none"> <li>Descriptive for proportions</li> <li>Poisson regression to estimate IRR for BMI recording, adjusted for screened for BMI by age 18-59y and ≥60y subgroups</li> </ul> <p><b>Results/effects estimates:</b></p> <p>Proportion of SMI patients who were screened for BMI:</p> <ul style="list-style-type: none"> <li>13.6% in 2000, 14.9% in 2001, 16.1% in 2002, 18.6% in 2003, 24.0% in 2004, 26.1% in 2005, 32.9% in 2006 and 36.9% in 2007</li> </ul> <p>1. Predictors associated with screening of BMI in patients with SMI in comparison to patients without SMI:</p> <ul style="list-style-type: none"> <li>People aged 18-59y (IRR: 0.599 in 2000, 0.615 in 2003 and 0.793 in 2005)</li> <li>People aged 60y and above (IRR: 0.571 in 2000, 0.533 in 2003, 0.657 in 2005 and 0.808 in 2007)</li> </ul> | <p><b>Author’s conclusions:</b></p> <p>“In UK primary care, people with SMI over 60 years of age remain less likely than the general population to receive annual CVD screening despite higher risk of developing CVD.”</p> <p><b>Reviewer’s comments:</b></p> <p>This study shows having SMI in age group 18-59 years is negatively associated with BMI screening until 2005, however, they were equally likely to be screened in 2007. However, patients with SMI who were aged 60 years and above were less likely to have a BMI screening.</p> <p>This study has clearly met 8/10 (80%) criteria in the critical appraisal tool. One of the criteria was unclear.</p> |
| <p><b>Authors:</b><br/>Rose et al. [80]</p>                                                                                                                                 | <p><b>Sample size:</b><br/>N= 79,947</p> <p><b>Inclusion criteria:</b></p>                                                                                                                                                                                                                                                                                                                                                                                                                                                                                                                                                                                                                                                                                                                                                                                                                           | <p><b>1. Factors associated with BMI Documentation:</b></p> <ul style="list-style-type: none"> <li>Sex</li> <li>Race</li> </ul>           | BMI Documentation | <p><b>Statistical analysis:</b></p> <ul style="list-style-type: none"> <li>Descriptive for proportions</li> <li>Chi-square to test association between the variables and the BMI documentation (not relevant to calculated RR below).</li> </ul>                                                                                                                                                                                                                                                                                                                                                                                                                                                                                                                                                                                                                                       | <p><b>Author’s conclusions:</b></p> <p>“In a large primary care network BMI documentation has been incomplete and for</p>                                                                                                                                                                                                                                                                                                                                                                                                                                                                                                                                                 |

|                                                                                                                                                                                    |                                                                                                                                                                                                                                                                                                                                                                                                                                                                                                                                                                                                                                                                                                                                                                                 |                                                                                                                                                                                                                                                                                                                                                                                |                                                 |                                                                                                                                                                                                                                                                                                                                                                                                                                                                                                                                                                                                                                                                                                                                                                                                    |                                                                                                                                                                                                                                                                                                                                                                                                                                                                       |
|------------------------------------------------------------------------------------------------------------------------------------------------------------------------------------|---------------------------------------------------------------------------------------------------------------------------------------------------------------------------------------------------------------------------------------------------------------------------------------------------------------------------------------------------------------------------------------------------------------------------------------------------------------------------------------------------------------------------------------------------------------------------------------------------------------------------------------------------------------------------------------------------------------------------------------------------------------------------------|--------------------------------------------------------------------------------------------------------------------------------------------------------------------------------------------------------------------------------------------------------------------------------------------------------------------------------------------------------------------------------|-------------------------------------------------|----------------------------------------------------------------------------------------------------------------------------------------------------------------------------------------------------------------------------------------------------------------------------------------------------------------------------------------------------------------------------------------------------------------------------------------------------------------------------------------------------------------------------------------------------------------------------------------------------------------------------------------------------------------------------------------------------------------------------------------------------------------------------------------------------|-----------------------------------------------------------------------------------------------------------------------------------------------------------------------------------------------------------------------------------------------------------------------------------------------------------------------------------------------------------------------------------------------------------------------------------------------------------------------|
| <p><b>Year published:</b><br/>2009</p> <p><b>Study design:</b><br/>Cross-sectional study</p> <p><b>Country:</b><br/>United States</p>                                              | <ul style="list-style-type: none"> <li>• Patients aged <math>\geq 18</math> years before or during the study period</li> <li>• Patient who had at least two clinic visits billed to their PCP during study period</li> </ul> <p><b>Exclusion criteria:</b></p> <ul style="list-style-type: none"> <li>• Patients with who had a height greater than or equal to 2.13 meters, weight <math>&lt; 31.8</math> or <math>&gt; 453.6</math> kg, systolic BP <math>&lt; 50</math> or <math>&gt; 260</math> mmHg, or diastolic BP <math>&lt; 30</math> or <math>&gt; 150</math> mmHg.</li> </ul> <p><b>Setting and population:</b><br/>Records from Massachusetts General Hospital Primary Care Practice Based Research Network in the US, between July 2005 to December 2006</p>       | <ul style="list-style-type: none"> <li>• Commercial Insurance or Medicare</li> <li>• History of CVD</li> <li>• History of diabetes</li> <li>• History of hypertension</li> <li>• History of dyslipidemia</li> </ul>                                                                                                                                                            |                                                 | <p><b>Results/effects estimates:</b><br/>Proportion of patients with BMI documentation between July 2005 to December 2006:</p> <ul style="list-style-type: none"> <li>• 60.5% had weight and height recording</li> </ul> <p>1. Factors associated with BMI documentation:</p> <ul style="list-style-type: none"> <li>• Female (Calculated RR*: 1.27 Ref male)</li> <li>• Race (Non-White Calculated RR*: 1.05, Ref White)</li> <li>• History of CVD: Yes (Calculated RR*: 0.98 Ref No)</li> <li>• History of diabetes: Yes (Calculated RR*: 1.05, Ref No)</li> <li>• History of hypertension: Yes (Calculated RR*: 0.99 Ref No)</li> <li>• History of dyslipidemia: Yes (Calculated RR*: 0.98, Ref No)</li> </ul>                                                                                  | <p>patients with BMI measured, risk factor control has been poorer in obese patients compared with NW, even in those with obesity and CVD or diabetes. Better knowledge of BMI could provide an opportunity for improved quality in obesity care.”</p> <p><b>Reviewer’s comments:</b><br/>This study shows female sex, Hispanic and black race, having commercial insurance or medicare and history of diabetes is positively associated in BMI documentation.</p>    |
| <p><b>Authors:</b><br/>Ruser et al. [81]</p> <p><b>Year published:</b><br/>2005</p> <p><b>Study design:</b><br/>Cross-sectional study</p> <p><b>Country:</b><br/>United States</p> | <p><b>Sample size:</b><br/>N= 424</p> <p><b>Inclusion criteria:</b></p> <ul style="list-style-type: none"> <li>• Patient who had at least 1 primary care visit during study period</li> <li>• Patients classified with overweight (BMI <math>\geq 25</math> kg/m<sup>2</sup>) or obesity (BMI <math>\geq 30</math> kg/m<sup>2</sup>)</li> </ul> <p><b>Exclusion criteria:</b></p> <ul style="list-style-type: none"> <li>• Patients were excluded if they were born before 1938,</li> <li>• Patients were not classified with overweight nor obesity (BMI <math>&lt; 25</math> kg/m<sup>2</sup>),</li> <li>• Patient who had a life expectancy <math>&lt; 6</math> months</li> <li>• Patients with no routine visits with primary clinician during the study period.</li> </ul> | <p><b>Factors associated with Identification or management of overweight and obesity:</b></p> <ul style="list-style-type: none"> <li>• Age</li> <li>• Race</li> <li>• Sex</li> <li>• Height</li> <li>• Weight</li> <li>• Co-morbidities</li> <li>• Smoking</li> <li>• Alcohol use <math>&gt; 2</math> drinks/day for men or <math>&gt; 1</math> drink/day for women</li> </ul> | <p>Identification of overweight and obesity</p> | <p><b>Statistical analysis:</b></p> <ul style="list-style-type: none"> <li>• Descriptive statistics for proportions</li> <li>• Logistic regression to estimate OR for identification of overweight and obesity, adjusted for covariates</li> </ul> <p><b>Results/effects estimates:</b><br/>Proportions of patients who had ICD-9 codes for overweight or obesity:</p> <ul style="list-style-type: none"> <li>• 13 of 178 (7.3%) patients classified with overweight in overweight group or 76 of 246 (30.9%) patients classified with obesity in obesity group.</li> </ul> <p>1. Predictors of Identification of overweight and obesity</p> <ul style="list-style-type: none"> <li>• BMI category (BMI <math>\geq 30</math>kg/m<sup>2</sup> OR: 7.51, Ref BMI 25–29.9kg/m<sup>2</sup>)</li> </ul> | <p><b>Author’s conclusions:</b><br/>“Our results suggest that Internal Medicine residents markedly underrecognize and undertreat overweight and obesity.”</p> <p><b>Reviewer’s comments:</b><br/>This study shows having a BMI <math>\geq 30</math>kg/m<sup>2</sup> is positively associated with identification of overweight and obesity.</p> <p>This study has clearly met 6/8 (75%) criteria in the critical appraisal tool. Two of the criteria was unclear.</p> |

|                                                                                                                                                                                              |                                                                                                                                                                                                                                                                                                                                                                                                                                                                                                                                                                                                                                                                            |                                                                                                                                                                                                                                                                                                                                                                                                                                                                                                                 |                   |                                                                                                                                                                                                                                                                                                                                                                                                                                                                                                                                                                                                                                                                                                                                                                                                                                                                                                                                                                                                                                                                                                                                                                                                                                                                                                                                                                                 |                                                                                                                                                                                                                                                                                                                                                                                                                                                                                                                                                                                                                                                                                     |
|----------------------------------------------------------------------------------------------------------------------------------------------------------------------------------------------|----------------------------------------------------------------------------------------------------------------------------------------------------------------------------------------------------------------------------------------------------------------------------------------------------------------------------------------------------------------------------------------------------------------------------------------------------------------------------------------------------------------------------------------------------------------------------------------------------------------------------------------------------------------------------|-----------------------------------------------------------------------------------------------------------------------------------------------------------------------------------------------------------------------------------------------------------------------------------------------------------------------------------------------------------------------------------------------------------------------------------------------------------------------------------------------------------------|-------------------|---------------------------------------------------------------------------------------------------------------------------------------------------------------------------------------------------------------------------------------------------------------------------------------------------------------------------------------------------------------------------------------------------------------------------------------------------------------------------------------------------------------------------------------------------------------------------------------------------------------------------------------------------------------------------------------------------------------------------------------------------------------------------------------------------------------------------------------------------------------------------------------------------------------------------------------------------------------------------------------------------------------------------------------------------------------------------------------------------------------------------------------------------------------------------------------------------------------------------------------------------------------------------------------------------------------------------------------------------------------------------------|-------------------------------------------------------------------------------------------------------------------------------------------------------------------------------------------------------------------------------------------------------------------------------------------------------------------------------------------------------------------------------------------------------------------------------------------------------------------------------------------------------------------------------------------------------------------------------------------------------------------------------------------------------------------------------------|
|                                                                                                                                                                                              | <p><b>Setting and population:</b></p> <ul style="list-style-type: none"> <li>Records of 2 resident clinics of the Yale Internal Medicine Residency Programs (the Family Health Center, St. Mary's Hospital, Waterbury, Conn and the VA Connecticut Healthcare System Primary Care Clinic, West Haven, Conn) between 1 September 2001 and 31 July 2002.</li> </ul>                                                                                                                                                                                                                                                                                                          |                                                                                                                                                                                                                                                                                                                                                                                                                                                                                                                 |                   |                                                                                                                                                                                                                                                                                                                                                                                                                                                                                                                                                                                                                                                                                                                                                                                                                                                                                                                                                                                                                                                                                                                                                                                                                                                                                                                                                                                 |                                                                                                                                                                                                                                                                                                                                                                                                                                                                                                                                                                                                                                                                                     |
| <p><b>Authors:</b><br/>Turner, Harris &amp; Mazza [82]</p> <p><b>Year published:</b><br/>2015</p> <p><b>Study design:</b><br/>Cross sectional study</p> <p><b>Country:</b><br/>Australia</p> | <p><b>Sample size:</b><br/>N=270,426</p> <p><b>Inclusion criteria:</b></p> <ul style="list-style-type: none"> <li>Patients aged <math>\geq 18</math> years before or during the study period</li> <li>Patients who had visited the same practice more than three times in the previous 2 years</li> </ul> <p><b>Exclusion criteria:</b><br/>None</p> <p><b>Setting and population:</b></p> <ul style="list-style-type: none"> <li>Records from Melbourne East Monash General Practice Database (MAGNET), a primary care database of 78 participating general practice clinics in the inner-eastern region of Melbourne between 1 July 2011 and 31 December 2013</li> </ul> | <p><b>1. Factors associated with BMI documentation:</b></p> <ul style="list-style-type: none"> <li>Age</li> <li>Sex</li> <li>Number of diagnoses recorded</li> <li>Specific diagnosis recorded: hypertension, hyperlipidaemia, musculoskeletal problems, depression and anxiety, diabetes, cardiovascular disease, stroke, and kidney disease</li> <li>Prescription of medication related to diabetes, depression and anxiety, blood pressure and cardiovascular disease, lipids, and anticoagulants</li> </ul> | BMI documentation | <p><b>Statistical analysis:</b></p> <ul style="list-style-type: none"> <li>Descriptive for proportions</li> <li>Logistic regression to estimate odd's ratio (OR) for documentation of BMI, adjusted for covariates</li> </ul> <p><b>Results/effects estimates:</b><br/>Proportion of patients with an anthropometric measurement recording between 1 July 2011 and 31 December 2013:</p> <ul style="list-style-type: none"> <li>36.9% had height records</li> <li>25.8% had weight records</li> <li>4.3% had WC records</li> <li>22.2% had BMI documented</li> </ul> <p>1. Predictors of BMI documentation:</p> <ul style="list-style-type: none"> <li>Age (<math>\geq 75</math>y OR: 1.60, 65-74y OR: 1.20, 45-64y OR: 1.31, Ref 19-44y)</li> <li>Sex: Female (OR: 0.86, Ref male)</li> <li>Number of diagnosis recorded (1 OR: 1.25, 2 OR: 1.45, <math>\geq 3</math> OR: 1.69, Ref 0 comorbidity)</li> <li>Specific diagnosis recorded (hypertension OR: 1.18, hyperlipidaemia OR: 1.26, musculoskeletal problems OR: 1.07, depression and anxiety OR: 0.94, diabetes OR: 1.85, cardiovascular disease OR: 0.91, stroke OR: 0.87, Ref 'no' for each diagnosis)</li> <li>Prescription of medication related to specific diagnosis (blood pressure/cardiovascular disease OR: 1.07, depression and anxiety OR: 1.07, diabetes OR: 1.24, Ref 'no' for each diagnosis)</li> </ul> | <p><b>Author's conclusions:</b><br/>"Recording of measures of obesity in general practice is currently not consistent with guideline recommendations. Strategies to support general practitioners may improve their documentation of measures of obesity."</p> <p><b>Reviewer's comments:</b><br/>This study shows that socio demographics (older age and male sex), increasing number of chronic medical conditions, diagnosis of chronic medical conditions, and medications for CVD or blood pressure, diabetes, depression/anxiety were positively associated with BMI documentation.</p> <p>This study has clearly met 8/8 (100%) criteria in the critical appraisal tool.</p> |
| <b>Authors:</b>                                                                                                                                                                              | <b>Sample size:</b><br>N=3,446                                                                                                                                                                                                                                                                                                                                                                                                                                                                                                                                                                                                                                             | <b>1. Factors associated with weight measurement:</b>                                                                                                                                                                                                                                                                                                                                                                                                                                                           | Weight records    | <b>Statistical analysis:</b>                                                                                                                                                                                                                                                                                                                                                                                                                                                                                                                                                                                                                                                                                                                                                                                                                                                                                                                                                                                                                                                                                                                                                                                                                                                                                                                                                    | <b>Author's conclusions:</b>                                                                                                                                                                                                                                                                                                                                                                                                                                                                                                                                                                                                                                                        |
|                                                                                                                                                                                              |                                                                                                                                                                                                                                                                                                                                                                                                                                                                                                                                                                                                                                                                            |                                                                                                                                                                                                                                                                                                                                                                                                                                                                                                                 |                   | <ul style="list-style-type: none"> <li>Descriptive for proportions</li> </ul>                                                                                                                                                                                                                                                                                                                                                                                                                                                                                                                                                                                                                                                                                                                                                                                                                                                                                                                                                                                                                                                                                                                                                                                                                                                                                                   |                                                                                                                                                                                                                                                                                                                                                                                                                                                                                                                                                                                                                                                                                     |

|                                                                                                                                                     |                                                                                                                                                                                                                                                                                                                                                                                                                                                                                                                                                                                                                                                                                                                                                                                                                                                                                                                                                                                                                                                      |                                                                                                                                                                                                                                                                                                                        |                                                     |                                                                                                                                                                                                                                                                                                                                                                                                                                                                                                                                                                                                                                                                                                                                                                                                                                                                                                                                                                                                                                                              |                                                                                                                                                                                                                                                                                                                                                                                                                                                                                                                                                                                                                                                                                                                                                                                                                                                                                                                                                                                                                   |
|-----------------------------------------------------------------------------------------------------------------------------------------------------|------------------------------------------------------------------------------------------------------------------------------------------------------------------------------------------------------------------------------------------------------------------------------------------------------------------------------------------------------------------------------------------------------------------------------------------------------------------------------------------------------------------------------------------------------------------------------------------------------------------------------------------------------------------------------------------------------------------------------------------------------------------------------------------------------------------------------------------------------------------------------------------------------------------------------------------------------------------------------------------------------------------------------------------------------|------------------------------------------------------------------------------------------------------------------------------------------------------------------------------------------------------------------------------------------------------------------------------------------------------------------------|-----------------------------------------------------|--------------------------------------------------------------------------------------------------------------------------------------------------------------------------------------------------------------------------------------------------------------------------------------------------------------------------------------------------------------------------------------------------------------------------------------------------------------------------------------------------------------------------------------------------------------------------------------------------------------------------------------------------------------------------------------------------------------------------------------------------------------------------------------------------------------------------------------------------------------------------------------------------------------------------------------------------------------------------------------------------------------------------------------------------------------|-------------------------------------------------------------------------------------------------------------------------------------------------------------------------------------------------------------------------------------------------------------------------------------------------------------------------------------------------------------------------------------------------------------------------------------------------------------------------------------------------------------------------------------------------------------------------------------------------------------------------------------------------------------------------------------------------------------------------------------------------------------------------------------------------------------------------------------------------------------------------------------------------------------------------------------------------------------------------------------------------------------------|
| <p>Verberne et al. [83]</p> <p><b>Year published:</b> 2018</p> <p><b>Study design:</b> Cross sectional study</p> <p><b>Country:</b> Netherlands</p> | <p><b>Inclusion criteria:</b></p> <ul style="list-style-type: none"> <li>• Patients born between 1945-1981 and registered in one of the participating general practices in NIVEL Primary Care Database</li> </ul> <p><b>Exclusion criteria:</b></p> <ul style="list-style-type: none"> <li>• Patients having incomplete registration in general practice</li> <li>• Patients with missing data on height and/or weight in the baseline questionnaire of the AMIGO study</li> <li>• Patients not having consultation with their GP in 2012</li> <li>• Patients having self-reported BMI &lt; 25 kg/m<sup>2</sup></li> <li>• Patients from general practices having poor data quality or unavailability of data</li> </ul> <p><b>Setting and population:</b></p> <ul style="list-style-type: none"> <li>• Records from NIVEL Primary Care Database combined with records from AMIGO study</li> <li>• Participants for this study were recruited through 99 general practices that participated in the NIVEL-PCD in April 2011 and July 2012</li> </ul> | <ul style="list-style-type: none"> <li>• Sex</li> <li>• Age</li> <li>• Educational level</li> <li>• BMI</li> <li>• Smoking status</li> <li>• Drinking status</li> <li>• Absence or presence of chronic condition</li> <li>• Presence of cardiovascular disorder, osteoarthritis, diabetes mellitus and COPD</li> </ul> |                                                     | <ul style="list-style-type: none"> <li>• Multiple logistic multilevel regression to estimate OR for weight record, adjusted for covariates (Model 2)</li> </ul> <p><b>Results/effects estimates:</b></p> <p>Proportion of patients with an anthropometric measurement:</p> <ul style="list-style-type: none"> <li>• 23% had BMI recordings (height and weight) in 2012</li> <li>• 58% had at least one weight recording from 2012 to 2015</li> </ul> <p>1 Predictors of weight recording:</p> <ul style="list-style-type: none"> <li>• Age (61-67y OR: 2.53, 51-60y OR: 2.26, 41-50y OR: 1.81, Ref 31-40y)</li> <li>• Educational Level (high OR: 0.70, intermediate OR: 0.83, Ref low)</li> <li>• BMI category: <math>\geq 30</math> kg/m<sup>2</sup> (OR: 1.25, Ref <math>\geq 25</math> and <math>&lt; 30</math> kg/m<sup>2</sup>)</li> <li>• Chronic condition: 'no' (OR: 0.39, Ref 'yes')</li> <li>• Specific diagnosis recorded (cardiovascular disorder OR: 3.16, diabetes mellitus OR: 10.27, COPD OR: 2.00, Ref 'no' for each diagnosis)</li> </ul> | <p>“Weight was frequently recorded for overweight patients with a chronic condition, for whom regular weight measurement is recommended in clinical guidelines, and for which weight recording is a performance indicator as part of the payment system. For younger patients and those without a chronic condition related to being overweight, weight was less frequently recorded. For these patients, routine recording of weight in EHRs deserves more attention, with the aim to support early recognition and treatment of overweight.”</p> <p><b>Reviewer’s comments:</b></p> <p>This study shows that socio demographics (older age and low educational level), having BMI <math>\geq 30</math> kg/m<sup>2</sup>, presence of chronic medical conditions and diagnosis of specific medical conditions (cardiovascular disorder, diabetes mellitus and COPD) were positively associated with weight recordings.</p> <p>This study has clearly met 8/8 (100%) criteria in the critical appraisal tool.</p> |
| <p><b>Authors:</b> Yoong et al. [84]</p>                                                                                                            | <p><b>Sample size:</b> N=1,111</p> <p><b>Inclusion criteria:</b></p>                                                                                                                                                                                                                                                                                                                                                                                                                                                                                                                                                                                                                                                                                                                                                                                                                                                                                                                                                                                 | <p><b>1. Factors associated with non-identification of overweight and obesity:</b></p> <ul style="list-style-type: none"> <li>• BMI</li> </ul>                                                                                                                                                                         | <p>Non-identification of overweight and obesity</p> | <p><b>Statistical analysis:</b></p> <ul style="list-style-type: none"> <li>• Descriptive for proportions</li> <li>• Multiple logistic regression to estimate OR for non-identification of overweight and obesity for covariates</li> </ul>                                                                                                                                                                                                                                                                                                                                                                                                                                                                                                                                                                                                                                                                                                                                                                                                                   | <p><b>Author’s conclusions:</b></p> <p>“GPs missed identifying a substantial proportion of overweight and obese patients.</p>                                                                                                                                                                                                                                                                                                                                                                                                                                                                                                                                                                                                                                                                                                                                                                                                                                                                                     |

|                                                                                                                                   |                                                                                                                                                                                                                                                                                                                                                                                                                                                                                                                        |                                                                                                                                                                                                                                                                                                                                                         |                                                                                                                                                                                                                                                                                                                                                                                                                                                                                                                                                                                                                                                                                            |                                                                                                                                                                                                                                                                                                                                                                                                                                                                                                                                                                    |
|-----------------------------------------------------------------------------------------------------------------------------------|------------------------------------------------------------------------------------------------------------------------------------------------------------------------------------------------------------------------------------------------------------------------------------------------------------------------------------------------------------------------------------------------------------------------------------------------------------------------------------------------------------------------|---------------------------------------------------------------------------------------------------------------------------------------------------------------------------------------------------------------------------------------------------------------------------------------------------------------------------------------------------------|--------------------------------------------------------------------------------------------------------------------------------------------------------------------------------------------------------------------------------------------------------------------------------------------------------------------------------------------------------------------------------------------------------------------------------------------------------------------------------------------------------------------------------------------------------------------------------------------------------------------------------------------------------------------------------------------|--------------------------------------------------------------------------------------------------------------------------------------------------------------------------------------------------------------------------------------------------------------------------------------------------------------------------------------------------------------------------------------------------------------------------------------------------------------------------------------------------------------------------------------------------------------------|
| <p><b>Year published:</b><br/>2014</p> <p><b>Study design:</b><br/>Cross sectional study</p> <p><b>Country:</b><br/>Australia</p> | <ul style="list-style-type: none"> <li>• Patients aged ≥18 years proving informed consent</li> <li>• Patients who completed touchscreen computer questionnaire</li> </ul> <p><b>Exclusion criteria:</b></p> <ul style="list-style-type: none"> <li>• None</li> </ul> <p><b>Setting and population:</b></p> <ul style="list-style-type: none"> <li>• Records of patients from 12 general practices randomly invited and consented to participate in the study in three urban cities in two Australian states</li> </ul> | <ul style="list-style-type: none"> <li>• Age</li> <li>• Sex</li> <li>• Presence of heart disease</li> <li>• Presence of high blood pressure</li> <li>• Presence of cholesterol</li> <li>• Presence of type 2 diabetes</li> <li>• Ethnicity</li> <li>• Had private health insurance</li> <li>• Frequency of consultation</li> <li>• Education</li> </ul> | <p><b>Results/effects estimates:</b></p> <p>Proportion of patients with an identification of obesity and overweight at study time:</p> <ul style="list-style-type: none"> <li>• 42% as overweight</li> <li>• 46% as having obesity</li> </ul> <p>1. Predictors of non-identification of overweight and obesity (subsample N=589):</p> <ul style="list-style-type: none"> <li>• BMI: obesity (OR: 0.1, Ref overweight)</li> <li>• Sex: male (OR: 1.7, Ref female)</li> <li>• Presence of high blood pressure: no (OR: 1.8, Ref yes)</li> <li>• Presence of type 2 diabetes: no (OR: 2.4, Ref yes)</li> <li>• Education: trade qualification/diploma (OR: 0.3, Ref HSC and below)</li> </ul> | <p>Strategies to support GPs in identifying their overweight or obese patients need to be implemented.”</p> <p><b>Reviewer’s comments:</b></p> <p>This study shows being male, absence of high blood pressure and type 2 diabetes are positively associated with non-identification of overweight and obesity. Whereas, having obesity and higher education are negatively associated with non-identification of overweight and obesity.</p> <p>This study has clearly met 7/8 (88%) criteria in the critical appraisal tool. One of the criteria was unclear.</p> |
|-----------------------------------------------------------------------------------------------------------------------------------|------------------------------------------------------------------------------------------------------------------------------------------------------------------------------------------------------------------------------------------------------------------------------------------------------------------------------------------------------------------------------------------------------------------------------------------------------------------------------------------------------------------------|---------------------------------------------------------------------------------------------------------------------------------------------------------------------------------------------------------------------------------------------------------------------------------------------------------------------------------------------------------|--------------------------------------------------------------------------------------------------------------------------------------------------------------------------------------------------------------------------------------------------------------------------------------------------------------------------------------------------------------------------------------------------------------------------------------------------------------------------------------------------------------------------------------------------------------------------------------------------------------------------------------------------------------------------------------------|--------------------------------------------------------------------------------------------------------------------------------------------------------------------------------------------------------------------------------------------------------------------------------------------------------------------------------------------------------------------------------------------------------------------------------------------------------------------------------------------------------------------------------------------------------------------|

**Notes:**  
Only significant predictors or those included in meta-analysis were reported in the results section of this table. The statistical significance was confirmed using a significance level of at 5% (p=0.05 or less) or the corresponding confidence level within 95%. \* The prevalence ratio was calculated by the authors of this review. # We assumed most of the study sample was aged 18 years and over based on the reported mean (SD) age of 49.4 (18.5)

**Abbreviations:**  
AMIGO: Occupational and Environmental Health Cohort; BP: Blood Pressure; BMI: Body Mass Index; CCI, Charlson Comorbidity Index; CHS, Clalit Health Services; CI: Confidence Interval; COPD: Chronic Obstructive Pulmonary Disease; CVD: Cardio-Vascular Disease; EMR, Electronic Medical Records; EHR: Electronic Health Record; GP: General Practitioner; GPRD: General Practice Research Database; HCP: Health Care Professional/Practitioner; HR: Hazard Ratio; HYDRA: Hypertension and Diabetes Screening and Awareness; IBD: Inflammatory Bowel Disease; ICD: International Classification of Disease; IMD: Index of Multiple Deprivation; IRR: Incident Rate Ratio; IRSD: Index for Relative Socioeconomic Disadvantage; NAFLD: Non-alcoholic Fatty Liver Disease; NCRAS: National Cancer Registration and Analysis Service; NHS: National Health Service; NP: Nurse Practitioner; NIVEL: Netherlands Institute for Health Services Research; NW: Normal Weight; ONS: Office for National Statistics; OR: Odd Ratio; OW: Overweight; PA: Physician Assistant; PCP: Primary Care Physician; PR: Prevalence Ratio; RA: Rheumatoid Arthritis; Ref: Reference category; RRR: Relative Rate Ratio; SEIFA: Socio-Economic Indexes for Areas; SMI: Severe Mental Illness; SPDS: Sentinel Practices Data Sourcing; THIN: The Health Improvement Network; WC: Waist Circumference; y: years;

**Definitions:**  
Biological sex of participants is denoted by the factor “sex”, we have assumed “gender” and “sex” as an interchangeable factor while reporting on the studies.  
Educational level: low = vocational education/ community college; intermediate = vocational/high school; high = college/university or higher  
Index of Multiple Deprivation (IMD) Quintile I = least deprived; IMD Quintile V = most deprived.  
READ is the Read Coded Clinical Terms code to identify the primary diagnosis.

Supplementary Table S4: Characteristics and summary of qualitative studies reviewed

| Study details                                                                                                                   | Population and setting                                                                                                                                                                                                                                                                                                                                                                                                                                                                   | Study design, aims and methods                                                                                                                                                                                                                                                                                                                                   | Main themes and subthemes with explanations                                                                                                                                                                                                                                                                                                                                                                                                                                                                                                                                                                                                                                                                                                                                                                                                                                                                                                                                                                                                                                                                                                                                                                                                                                                                                                                                                                                                                                                                                                                                                                                                                                                                                                                                                                                                                                                                                                                                                                                                                                                                                                                                                                                                                                                                                                                                           | Author's conclusions and reviewer's comments                                                                                                                                                                                                                                                                                                                                                                                                                                                                                                                                                                                                                                                                                                                                                                                                                                                                                                                      |
|---------------------------------------------------------------------------------------------------------------------------------|------------------------------------------------------------------------------------------------------------------------------------------------------------------------------------------------------------------------------------------------------------------------------------------------------------------------------------------------------------------------------------------------------------------------------------------------------------------------------------------|------------------------------------------------------------------------------------------------------------------------------------------------------------------------------------------------------------------------------------------------------------------------------------------------------------------------------------------------------------------|---------------------------------------------------------------------------------------------------------------------------------------------------------------------------------------------------------------------------------------------------------------------------------------------------------------------------------------------------------------------------------------------------------------------------------------------------------------------------------------------------------------------------------------------------------------------------------------------------------------------------------------------------------------------------------------------------------------------------------------------------------------------------------------------------------------------------------------------------------------------------------------------------------------------------------------------------------------------------------------------------------------------------------------------------------------------------------------------------------------------------------------------------------------------------------------------------------------------------------------------------------------------------------------------------------------------------------------------------------------------------------------------------------------------------------------------------------------------------------------------------------------------------------------------------------------------------------------------------------------------------------------------------------------------------------------------------------------------------------------------------------------------------------------------------------------------------------------------------------------------------------------------------------------------------------------------------------------------------------------------------------------------------------------------------------------------------------------------------------------------------------------------------------------------------------------------------------------------------------------------------------------------------------------------------------------------------------------------------------------------------------------|-------------------------------------------------------------------------------------------------------------------------------------------------------------------------------------------------------------------------------------------------------------------------------------------------------------------------------------------------------------------------------------------------------------------------------------------------------------------------------------------------------------------------------------------------------------------------------------------------------------------------------------------------------------------------------------------------------------------------------------------------------------------------------------------------------------------------------------------------------------------------------------------------------------------------------------------------------------------|
| <p><b>Authors:</b><br/>Dunkley et al. [85]</p> <p><b>Year published:</b><br/>2009</p> <p><b>Country:</b><br/>United Kingdom</p> | <p><b>Number of participants:</b><br/>10 HCPs (4 PNs, 6 GPs) and 18 patients</p> <p><b>Inclusion criteria:</b><br/>HCPs:<br/>• All GPs and PNs in participating practices<br/>Patients:<br/>• Speak and understand English and/or Gujarati<br/>• Aged 25-75 years</p> <p><b>Exclusion criteria:</b><br/>None</p> <p><b>Setting and population:</b><br/>• General practices in Leicestershire, UK<br/>• Practices were diverse in size and location, with ethnically diverse patients</p> | <p>Qualitative study conducted using purposive sampling, in-depth, semi-structured interviews and thematic analysis.</p> <p><b>Aims:</b><br/>The study aimed to explore the views of patients and HCPs towards waist size measurement, including identification of possible barriers to carrying out this assessment in a multi-ethnic primary care setting.</p> | <p><b>Theme 1:</b><br/>Understanding of waist size measurement to assess or monitor risk</p> <ul style="list-style-type: none"> <li>• HCPs demonstrated awareness of large waist size and risk of diabetes</li> <li>• Association of waist circumference with central obesity was less frequently raised</li> <li>• Awareness of ethnic subspecific recommendations was poor</li> <li>• Nearly half of the patients demonstrated no knowledge on the importance of waist circumference measurement and associated risk of high measurements</li> <li>• Some patients demonstrated perception of denial of the association of body size and health</li> </ul> <p><b>Theme 2:</b><br/>Attitudes related to perceived barriers and facilitators to waist measurement</p> <p><b>Subtheme 1: Standardisation and training needs</b></p> <ul style="list-style-type: none"> <li>• Most HCPs stated no <i>specific training</i> was provided related to implementing WCM</li> <li>• Concerns of HCPs were <i>lack of knowledge</i> on positioning the tape, lack of repeatability, operator variability and interpretation of results</li> </ul> <p><b>Subtheme 2: Perceived usefulness</b></p> <ul style="list-style-type: none"> <li>• Most HCPs agreed WCM was more useful than BMI and stated the need of this assessment in addition to BMI</li> <li>• Some HCPs felt patients are <i>not familiar</i> with waist and may not understand how it relates to health risks</li> <li>• Some HCPs stated waist measurement was something that could <i>motivate</i> patients to make lifestyle changes</li> <li>• Majority of patients acknowledged the <i>importance of WCM</i> in identifying health problems and facilitating healthy lifestyle changes and thought it would be beneficial for their HCP to know their WCM</li> </ul> <p><b>Subtheme 3: Personal feelings</b></p> <ul style="list-style-type: none"> <li>• For some HCPs, the <i>perceived intimate nature</i> of WCM appeared to be a barrier</li> <li>• <i>HCPs being comfortable</i> appeared to be positively associated with increased experience of measuring waist size and negatively with patients having overweight or obesity</li> <li>• HCPs felt that <i>patients might feel uncomfortable</i> or be embarrassed</li> <li>• Few HCPs demonstrated <i>preconceived ideas</i> about cultural groups</li> </ul> | <p><b>Author's conclusions:</b><br/>“This study adds to our understanding of views on WCM in a multi-ethnic setting, highlighting factors for consideration if WCM is to be facilitated in routine practice.”</p> <p><b>Reviewer's comments:</b></p> <ul style="list-style-type: none"> <li>• This study revealed several barriers to implementing WC measurement including lack of knowledge and specific training, negative perceptions about its usefulness, clinical importance, and acceptability (time and cost among HCPs; comfortableness, appearance, and hygiene concerns among their patients)</li> <li>• Perceived enablers of WC measurement include its usefulness to motivate healthy behavioural changes among patients, financial and organisational incentives for HCPs</li> <li>• Findings were consistent across GPs, PNs, and ethnic groups</li> </ul> <p>This study has clearly met 7/10 (70%) criteria in the critical appraisal tool.</p> |

1  
2  
3  
4  
5  
6  
7  
8  
9  
10  
11  
12  
13  
14  
15  
16  
17  
18  
19  
20  
21  
22  
23  
24  
25  
26  
27  
28  
29  
30  
31  
32  
33  
34  
35  
36  
37  
38  
39  
40  
41  
42  
43  
44  
45  
46

|                                                                                                                               |                                                                                                                                                                                                                                                                                                                                                                                                                                                                                 |                                                                                                                                                                                                                                                                                        |                                                                                                                                                                                                                                                                                                                                                                                                                                                                                                                                                                                                                                                                                                                                                                                                                                                                                                                                                                                                                                                                                                                                                                               |                                                                                                                                                                                                                                                                                                                                                                                                                                                                                                                                                                        |
|-------------------------------------------------------------------------------------------------------------------------------|---------------------------------------------------------------------------------------------------------------------------------------------------------------------------------------------------------------------------------------------------------------------------------------------------------------------------------------------------------------------------------------------------------------------------------------------------------------------------------|----------------------------------------------------------------------------------------------------------------------------------------------------------------------------------------------------------------------------------------------------------------------------------------|-------------------------------------------------------------------------------------------------------------------------------------------------------------------------------------------------------------------------------------------------------------------------------------------------------------------------------------------------------------------------------------------------------------------------------------------------------------------------------------------------------------------------------------------------------------------------------------------------------------------------------------------------------------------------------------------------------------------------------------------------------------------------------------------------------------------------------------------------------------------------------------------------------------------------------------------------------------------------------------------------------------------------------------------------------------------------------------------------------------------------------------------------------------------------------|------------------------------------------------------------------------------------------------------------------------------------------------------------------------------------------------------------------------------------------------------------------------------------------------------------------------------------------------------------------------------------------------------------------------------------------------------------------------------------------------------------------------------------------------------------------------|
|                                                                                                                               |                                                                                                                                                                                                                                                                                                                                                                                                                                                                                 |                                                                                                                                                                                                                                                                                        | <ul style="list-style-type: none"> <li>• Patients did not think that they would be embarrassed or feel uncomfortable about having their waist measured</li> <li>• Few female patients stated <i>preference for being measured by a female HCP</i>, but this was not seen as essential</li> </ul> <p><b>Subtheme 4: Practical considerations</b></p> <ul style="list-style-type: none"> <li>• Majority of HCPs mentioned <i>time as a barrier</i> in relation to appointment length and extra workload associated</li> <li>• Majority of HCPs raised <i>cost implications</i> as a barrier in implementation of WCM</li> <li>• HCPs suggested inclusion of WCM in the Quality and Outcomes Framework (QoF) as a <i>potential incentive</i> along with <i>organisational incentives</i> for implementing WCM</li> <li>• <i>Patient's concerns</i> included perceptions about hygiene, the need to wear appropriate clothing, time implications and a perceived need for the opportunity to consider whether it would be appropriate to bring children to the appointment</li> </ul>                                                                                             |                                                                                                                                                                                                                                                                                                                                                                                                                                                                                                                                                                        |
| <p><b>Authors:</b><br/>Gaynor et al. [86]</p> <p><b>Year published:</b><br/>2018</p> <p><b>Country:</b><br/>United States</p> | <p><b>Number of participants:</b><br/>7 PC Providers (5 NPs; 1 Doctor of Medicine; 1 Doctor of Osteopathy) attended interviews.<br/>30 PCPs (Doctor of Medicine, Doctor of Osteopathy, NPs and 1 physician assistant) completed the surveys.</p> <p><b>Inclusion criteria:</b><br/>• PC providers</p> <p><b>Exclusion criteria:</b><br/>None</p> <p><b>Setting and population:</b><br/>• 6 PC practices in South-eastern Pennsylvania, New Castle and Kent County, Delaware</p> | <p>Explanatory mixed-methods design.<br/>Qualitative component involved purposive sampling, semi-structured interviews and thematic analysis.</p> <p><b>Aims:</b><br/>The study aimed to gain a deeper understanding of waist circumference measurement rejection in primary care.</p> | <p><b>Theme 1:</b><br/>Innovation characteristics</p> <ul style="list-style-type: none"> <li>• WCM did not offer greater advantage, compatibility, ease of use, or ease of trial over BMI</li> <li>• Disadvantages of WCM included time associated with obtaining and documenting measurement, discomfort with measuring a patient's WCM, lack of knowledge and training re technique, lack of equipment (i.e., tape measures)</li> </ul> <p><b>Theme 2:</b><br/>Communication channels and the social system</p> <ul style="list-style-type: none"> <li>• Peer-to-peer communications had the greatest influence on provider use of measurements, followed by formal education and clinical experiences, experiences with preceptors, webinars, apps and conferences, and professional journals</li> </ul> <p><b>Theme 3:</b><br/>Time, comfort and practice norms</p> <ul style="list-style-type: none"> <li>• Lack of time served as a barrier to adopting WCM</li> <li>• Measurements were taken if part of routine practice</li> <li>• PC providers expressed discomfort in obtaining WCM for members of the opposite sex or people who were overweight/obese</li> </ul> | <p><b>Author's conclusions:</b><br/>"Before implementing a new initiative, WCM training modules and time efficient plans for obtaining WCM in PC settings should be piloted."</p> <p><b>Reviewer's comments:</b></p> <ul style="list-style-type: none"> <li>• Confusing presentation of qualitative results</li> <li>• Qualitative data collected in 2 group interviews and one individual interview. Unclear whether the group interviews were actually focus groups</li> </ul> <p>This study has clearly met 8/10 (80%) criteria in the critical appraisal tool.</p> |

|                                                                                                                                |                                                                                                                                                                                                                                                                                                                                                                                                                                                                                                                                                                                                                                                |                                                                                                                                                                                                                                                                                                                                         |                                                                                                                                                                                                                                                                                                                                                                                                                                                                                                                                                                                                                                                                                                                                                                                                                                                                                                                                                                                                                                                                                                                                                                                                                                                                                                                                                                                                                                                                                                                                                                                                                                                                                                                                                                                                                                                                                                                                                                                                                                                                                                                                                                                                                                                                                                                                                                                                                                                                                                                                                                                                                                                                                                                                                                                                 |                                                                                                                                                                                                                                                                                                                                                                                                                                                                                                                                                                                                                                                                                                                                                                                                                                                                                                                                                         |
|--------------------------------------------------------------------------------------------------------------------------------|------------------------------------------------------------------------------------------------------------------------------------------------------------------------------------------------------------------------------------------------------------------------------------------------------------------------------------------------------------------------------------------------------------------------------------------------------------------------------------------------------------------------------------------------------------------------------------------------------------------------------------------------|-----------------------------------------------------------------------------------------------------------------------------------------------------------------------------------------------------------------------------------------------------------------------------------------------------------------------------------------|-------------------------------------------------------------------------------------------------------------------------------------------------------------------------------------------------------------------------------------------------------------------------------------------------------------------------------------------------------------------------------------------------------------------------------------------------------------------------------------------------------------------------------------------------------------------------------------------------------------------------------------------------------------------------------------------------------------------------------------------------------------------------------------------------------------------------------------------------------------------------------------------------------------------------------------------------------------------------------------------------------------------------------------------------------------------------------------------------------------------------------------------------------------------------------------------------------------------------------------------------------------------------------------------------------------------------------------------------------------------------------------------------------------------------------------------------------------------------------------------------------------------------------------------------------------------------------------------------------------------------------------------------------------------------------------------------------------------------------------------------------------------------------------------------------------------------------------------------------------------------------------------------------------------------------------------------------------------------------------------------------------------------------------------------------------------------------------------------------------------------------------------------------------------------------------------------------------------------------------------------------------------------------------------------------------------------------------------------------------------------------------------------------------------------------------------------------------------------------------------------------------------------------------------------------------------------------------------------------------------------------------------------------------------------------------------------------------------------------------------------------------------------------------------------|---------------------------------------------------------------------------------------------------------------------------------------------------------------------------------------------------------------------------------------------------------------------------------------------------------------------------------------------------------------------------------------------------------------------------------------------------------------------------------------------------------------------------------------------------------------------------------------------------------------------------------------------------------------------------------------------------------------------------------------------------------------------------------------------------------------------------------------------------------------------------------------------------------------------------------------------------------|
|                                                                                                                                |                                                                                                                                                                                                                                                                                                                                                                                                                                                                                                                                                                                                                                                |                                                                                                                                                                                                                                                                                                                                         |                                                                                                                                                                                                                                                                                                                                                                                                                                                                                                                                                                                                                                                                                                                                                                                                                                                                                                                                                                                                                                                                                                                                                                                                                                                                                                                                                                                                                                                                                                                                                                                                                                                                                                                                                                                                                                                                                                                                                                                                                                                                                                                                                                                                                                                                                                                                                                                                                                                                                                                                                                                                                                                                                                                                                                                                 |                                                                                                                                                                                                                                                                                                                                                                                                                                                                                                                                                                                                                                                                                                                                                                                                                                                                                                                                                         |
| <p><b>Authors:</b><br/>McHale et al. [87]</p> <p><b>Year published:</b><br/>2020</p> <p><b>Country:</b><br/>United Kingdom</p> | <p><b>Number of participants:</b><br/>305 patients completed a questionnaire and 14 PCPs (12 GPs; 2 PNs) completed a questionnaire and participated in interviews</p> <p><b>Inclusion criteria:</b><br/>PCPs:<br/> <ul style="list-style-type: none"> <li>GPs and PNs in 7 participating practices</li> </ul>           Patients:<br/> <ul style="list-style-type: none"> <li>Consulted by one of the participating PCPs</li> </ul> </p> <p><b>Exclusion criteria:</b><br/>None</p> <p><b>Setting and population:</b><br/> <ul style="list-style-type: none"> <li>7 Primary Care Practices across 3 NHS Scotland health boards</li> </ul> </p> | <p>Convergent mixed methods design using convenience sampling. Qualitative component used semi-structured interviews and thematic analysis.</p> <p><b>Aims:</b><br/>The study aimed to understand the beliefs that PCPs and patients with overweight and obesity have about obesity and primary care weight management in Scotland.</p> | <p><b>Theme 1:</b><br/>PCP role in patient weight management</p> <ul style="list-style-type: none"> <li>GPs and PNs had differing views about the role of primary care in patient weight management</li> <li>Addressing patient weight issues and awareness was GPs' professional responsibility particularly when patients' excessive weight was impacting on their health or when patients requested assistance with their weight</li> <li>Some GPs did not believe it was their role to engage patients in preventative weight management or monitor their weight and did not perceive prevention and monitoring were an efficient use of their time</li> <li>GPs perceived that standalone weight issues were the responsibility of the patient, not primary care</li> <li>PN participants perceived direct weight management was part of their role and regularly engaged in weight management and monitoring with patients</li> </ul> <p><b>Theme 2:</b><br/>Discussing weight issues with patients</p> <ul style="list-style-type: none"> <li>PCPs preferred to discuss weight issues within the context of patients' existing health issues</li> <li>PCPs expressed an apprehension to start a discussion about patient weight when they could not establish a clear link between existing health issues and the patient's weight, or when patients did not recognise that their body weight was excessive and potentially problematic</li> <li>PCPs perceived that weight was a personal issue, and discussing weight without a health-related reason, was inappropriate and may elicit a negative emotional reaction</li> </ul> <p><b>Theme 3:</b><br/>Barriers to weight management</p> <ul style="list-style-type: none"> <li>The inefficacy of weight management interventions was a barrier</li> <li>There was a lack of confidence in the evidence base for weight management interventions recommended by clinical guidelines</li> <li>Systemic barriers to weight management included lack of consultation time, restrictive eligibility criteria for specialised weight management referrals and shortage of financial and human resources in primary care</li> <li>Lack of referral pathways for overweight patients when weight was not impacting on their health</li> <li>One PCP highlighted that current NHS working contracts did not prioritise or incentivise weight management</li> <li>Several PCPs described patients with overweight and obesity as lacking the motivation to address weight issues, and that for many patients their weight was not a priority</li> <li>PCPs acknowledged that training was always potentially useful; however, most were confident in their ability and were ambivalent about receiving additional weight management</li> </ul> | <p><b>Author's conclusions:</b><br/>"Acknowledging a shared responsibility for patient weight could improve outcome for patients with overweight and obesity. There is a pressing need to review, standardise and clarify the primary care weight management process in NHS Scotland."</p> <p><b>Reviewer's comments:</b></p> <ul style="list-style-type: none"> <li>This study revealed that PCPs acknowledged a responsibility for patient weight but they found it challenging to discuss weight related issues with patients</li> <li>There were multiple barriers to weight management, both systemic and patient related</li> <li>Some inconsistencies in terminology related to the design, which is a little confusing, i.e., authors refer to cross-sectional mixed methods; convergent mixed methods; concurrent triangulation mixed methods</li> </ul> <p>This study has clearly met 7/10 (70%) criteria in the critical appraisal tool.</p> |



1  
2  
3  
4  
5  
6  
7  
8  
9  
10  
11  
12  
13  
14  
15  
16  
17  
18  
19  
20  
21  
22  
23  
24  
25  
26  
27  
28  
29  
30  
31  
32  
33  
34  
35  
36  
37  
38  
39  
40  
41  
42  
43  
44  
45  
46

|  |  |  |                                                                                                            |  |
|--|--|--|------------------------------------------------------------------------------------------------------------|--|
|  |  |  | training. Lack of weight management effectiveness was due to patient factors, including lack of motivation |  |
|--|--|--|------------------------------------------------------------------------------------------------------------|--|

**Abbreviations:**  
 BMI: Body Mass Index; GP: General Practitioner; HCP: Health Care Professional/Practitioner; NHS: National Health Service; NP: Nurse Practitioner; PC: Primary Care; PCP: Primary Care Provider; PN: Practice Nurse; UK: United Kingdom; WC: Waist Circumference; WCM: Waist Circumference Measurement.

For peer review only

Supplementary Table S5: Risk of bias assessment of studies reviewed

| Cohort                                  | 1. Were the two groups similar and recruited from the same population? | 2. Were the exposure measures measured similarly to assign people to both exposed and unexposed groups? | 3. Was the exposure measured in a valid and reliable way? | 4. Were confounding factors identified?                                     | 5. Were strategies to deal with confounding factors stated? | 6. Were the groups/participants free of the outcome at the start of the study (or at the moment of exposure)? | 7. Were the outcomes measured in a valid and reliable way? | 8. Was the follow up time reported and sufficient to be long enough for outcomes to occur? | 9. Was follow up complete, and if not, were the reasons to loss to follow up described and explored? | 10. Were strategies to address incomplete follow up utilized? | 11. Was appropriate statistical analysis used? | Overall Quality | Unclear | Proportion |
|-----------------------------------------|------------------------------------------------------------------------|---------------------------------------------------------------------------------------------------------|-----------------------------------------------------------|-----------------------------------------------------------------------------|-------------------------------------------------------------|---------------------------------------------------------------------------------------------------------------|------------------------------------------------------------|--------------------------------------------------------------------------------------------|------------------------------------------------------------------------------------------------------|---------------------------------------------------------------|------------------------------------------------|-----------------|---------|------------|
| Booth, Prevost & Gulliford (2013)       | Yes                                                                    | Yes                                                                                                     | Yes                                                       | Yes                                                                         | Yes                                                         | Not applicable                                                                                                | Yes                                                        | Yes                                                                                        | Yes                                                                                                  | No                                                            | Yes                                            | 9/10            | 0       | 90%        |
| Emanuel et al. (2016)                   | Yes                                                                    | Yes                                                                                                     | Yes                                                       | Yes                                                                         | Yes                                                         | Not applicable                                                                                                | Unclear                                                    | Yes                                                                                        | Not applicable                                                                                       | Not applicable                                                | Yes                                            | 7/8             | 1       | 88%        |
| Nicholson et al. (2019)                 | Yes                                                                    | Yes                                                                                                     | Unclear                                                   | Yes                                                                         | Yes                                                         | Not applicable                                                                                                | Unclear                                                    | Yes                                                                                        | Yes                                                                                                  | No                                                            | Yes                                            | 7/10            | 2       | 70%        |
| Osborn et al. (2011)                    | Yes                                                                    | Yes                                                                                                     | Yes                                                       | Yes                                                                         | Yes                                                         | Not applicable                                                                                                | Yes                                                        | Yes                                                                                        | Unclear                                                                                              | No                                                            | Yes                                            | 8/10            | 1       | 80%        |
| Cross-sectional                         | 1. Were the criteria for inclusion in the sample clearly defined?      | 2. Were the study subjects and the setting described in detail?                                         | 3. Was the exposure measured in a valid and reliable way? | 4. Were objective, standard criteria used for measurement of the condition? | 5. Were confounding factors identified?                     | 6. Were strategies to deal with confounding factors stated?                                                   | 7. Were the outcomes measured in a valid and reliable way? | 8. Was appropriate statistical analysis used?                                              |                                                                                                      |                                                               |                                                | Overall Quality | Unclear | Proportion |
| Aleem et al. (2015)                     | Yes                                                                    | Yes                                                                                                     | Yes                                                       | Yes                                                                         | No                                                          | No                                                                                                            | Yes                                                        | No                                                                                         |                                                                                                      |                                                               |                                                | 5/8             | 0       | 63%        |
| Baer et al. (2013)                      | Yes                                                                    | Yes                                                                                                     | Yes                                                       | Yes                                                                         | Yes                                                         | Yes                                                                                                           | Yes                                                        | Yes                                                                                        |                                                                                                      |                                                               |                                                | 8/8             | 0       | 100%       |
| Bleich, Pickett-Blakely & Cooper (2011) | Yes                                                                    | Yes                                                                                                     | Yes                                                       | Yes                                                                         | Yes                                                         | Yes                                                                                                           | Yes                                                        | Yes                                                                                        |                                                                                                      |                                                               |                                                | 8/8             | 0       | 100%       |
| Bramlage et al. (2014)                  | Yes                                                                    | Yes                                                                                                     | Yes                                                       | Yes                                                                         | Yes                                                         | Yes                                                                                                           | Yes                                                        | Unclear                                                                                    |                                                                                                      |                                                               |                                                | 7/8             | 1       | 88%        |

|                                |                                                                                                         |                                                                                                        |                                                                                                     |                                                                                                            |                                                                                                  |                                                                                     |                                                                                          |                                                                       |                                                                                                                                                           |                                                                                                                    |  |                        |                |                   |
|--------------------------------|---------------------------------------------------------------------------------------------------------|--------------------------------------------------------------------------------------------------------|-----------------------------------------------------------------------------------------------------|------------------------------------------------------------------------------------------------------------|--------------------------------------------------------------------------------------------------|-------------------------------------------------------------------------------------|------------------------------------------------------------------------------------------|-----------------------------------------------------------------------|-----------------------------------------------------------------------------------------------------------------------------------------------------------|--------------------------------------------------------------------------------------------------------------------|--|------------------------|----------------|-------------------|
| Cuccu, Abi-Aad & Duggal (2019) | Yes                                                                                                     | Yes                                                                                                    | Yes                                                                                                 | Yes                                                                                                        | Yes                                                                                              | Yes                                                                                 | Yes                                                                                      | Yes                                                                   |                                                                                                                                                           |                                                                                                                    |  | 8/8                    | 0              | 100%              |
| Cyr et al. (2016)              | Yes                                                                                                     | Yes                                                                                                    | Yes                                                                                                 | Yes                                                                                                        | Yes                                                                                              | Yes                                                                                 | Yes                                                                                      | Yes                                                                   |                                                                                                                                                           |                                                                                                                    |  | 8/8                    | 0              | 100%              |
| Dalton et al. (2011)           | Yes                                                                                                     | Yes                                                                                                    | Yes                                                                                                 | Yes                                                                                                        | Yes                                                                                              | Yes                                                                                 | Yes                                                                                      | Yes                                                                   |                                                                                                                                                           |                                                                                                                    |  | 8/8                    | 0              | 100%              |
| Ghosh (2016)                   | Yes                                                                                                     | Yes                                                                                                    | Yes                                                                                                 | Yes                                                                                                        | Yes                                                                                              | Yes                                                                                 | Yes                                                                                      | Yes                                                                   |                                                                                                                                                           |                                                                                                                    |  | 8/8                    | 0              | 100%              |
| Gonzalez-Chica et al. (2019)   | Yes                                                                                                     | Yes                                                                                                    | Yes                                                                                                 | Yes                                                                                                        | Yes                                                                                              | Yes                                                                                 | Yes                                                                                      | Yes                                                                   |                                                                                                                                                           |                                                                                                                    |  | 8/8                    | 0              | 100%              |
| Gutiérrez Angulo et al. (2014) | Yes                                                                                                     | Unclear                                                                                                | Yes                                                                                                 | Yes                                                                                                        | No                                                                                               | No                                                                                  | Yes                                                                                      | No                                                                    |                                                                                                                                                           |                                                                                                                    |  | 4/8                    | 1              | 50%               |
| Mattar et al. (2017)           | Yes                                                                                                     | Yes                                                                                                    | Yes                                                                                                 | Yes                                                                                                        | Yes                                                                                              | Yes                                                                                 | Yes                                                                                      | Yes                                                                   |                                                                                                                                                           |                                                                                                                    |  | 8/8                    | 0              | 100%              |
| Melamed et al. (2009)          | Yes                                                                                                     | Yes                                                                                                    | Yes                                                                                                 | Yes                                                                                                        | Yes                                                                                              | Yes                                                                                 | Yes                                                                                      | Yes                                                                   |                                                                                                                                                           |                                                                                                                    |  | 8/8                    | 0              | 100%              |
| Mocarski et al. (2018)         | Yes                                                                                                     | Yes                                                                                                    | Yes                                                                                                 | Yes                                                                                                        | Yes                                                                                              | Yes                                                                                 | Yes                                                                                      | Yes                                                                   |                                                                                                                                                           |                                                                                                                    |  | 8/8                    | 0              | 100%              |
| Rose et al. (2009)             | Yes                                                                                                     | Yes                                                                                                    | Yes                                                                                                 | Yes                                                                                                        | No                                                                                               | No                                                                                  | Yes                                                                                      | No                                                                    |                                                                                                                                                           |                                                                                                                    |  | 5/8                    | 0              | 63%               |
| Ruser et al. (2005)            | Yes                                                                                                     | Yes                                                                                                    | Yes                                                                                                 | Yes                                                                                                        | Unclear                                                                                          | Yes                                                                                 | Yes                                                                                      | Unclear                                                               |                                                                                                                                                           |                                                                                                                    |  | 6/8                    | 2              | 75%               |
| Turner, Harris & Mazza (2015)  | Yes                                                                                                     | Yes                                                                                                    | Yes                                                                                                 | Yes                                                                                                        | Yes                                                                                              | Yes                                                                                 | Yes                                                                                      | Yes                                                                   |                                                                                                                                                           |                                                                                                                    |  | 8/8                    | 0              | 100%              |
| Verberne et al. (2018)         | Yes                                                                                                     | Yes                                                                                                    | Yes                                                                                                 | Yes                                                                                                        | Yes                                                                                              | Yes                                                                                 | Yes                                                                                      | Yes                                                                   |                                                                                                                                                           |                                                                                                                    |  | 8/8                    | 0              | 100%              |
| Yoong et al. (2014)            | Yes                                                                                                     | Yes                                                                                                    | Yes                                                                                                 | Yes                                                                                                        | Yes                                                                                              | Yes                                                                                 | Unclear                                                                                  | Yes                                                                   |                                                                                                                                                           |                                                                                                                    |  | 7/8                    | 1              | 88%               |
| <b>Qualitative research</b>    | <b>1. Is there congruity between the stated philosophical perspective and the research methodology?</b> | <b>2. Is there congruity between the research methodology and the research question or objectives?</b> | <b>3. Is there congruity between the research methodology and the methods used to collect data?</b> | <b>4. Is there congruity between the research methodology and the representation and analysis of data?</b> | <b>5. Is there congruity between the research methodology and the interpretation of results?</b> | <b>6. Is there a statement locating the researcher culturally or theoretically?</b> | <b>7. Is the influence of the researcher on the research, and vice-versa, addressed?</b> | <b>8. Are participants, and their voices, adequately represented?</b> | <b>9. Is the research ethical according to current criteria or, for recent studies, and is there evidence of ethical approval by an appropriate body?</b> | <b>10. Do the conclusions drawn in the research report flow from the analysis, or interpretation, of the data?</b> |  | <b>Overall Quality</b> | <b>Unclear</b> | <b>Proportion</b> |
| Dunkley et al. (2009)          | No                                                                                                      | Yes                                                                                                    | Yes                                                                                                 | Yes                                                                                                        | Yes                                                                                              | No                                                                                  | No                                                                                       | Yes                                                                   | Yes                                                                                                                                                       | Yes                                                                                                                |  | 7/10                   | 0              | 70%               |
| Gaynor et al (2018)            | Yes                                                                                                     | Yes                                                                                                    | Yes                                                                                                 | Yes                                                                                                        | Yes                                                                                              | Yes                                                                                 | No                                                                                       | No                                                                    | Yes                                                                                                                                                       | Yes                                                                                                                |  | 8/10                   | 0              | 80%               |

|                     |    |     |     |     |     |    |    |     |     |     |  |      |   |     |
|---------------------|----|-----|-----|-----|-----|----|----|-----|-----|-----|--|------|---|-----|
| McHale et al (2020) | No | Yes | Yes | Yes | Yes | No | No | Yes | Yes | Yes |  | 7/10 | 0 | 70% |
|---------------------|----|-----|-----|-----|-----|----|----|-----|-----|-----|--|------|---|-----|

For peer review only

1  
2  
3  
4  
5  
6  
7  
8  
9  
10  
11  
12  
13  
14  
15  
16  
17  
18  
19  
20  
21  
22  
23  
24  
25  
26  
27  
28  
29  
30  
31  
32  
33  
34  
35  
36  
37  
38  
39  
40  
41  
42  
43  
44  
45  
46

## Supplementary Section S6: Summary of results from all meta-analyses

### S6.1 Sex as a predictor of BMI assessment

There is statistically significant evidence that BMI assessment is more common in females than in males overall, as well as specific to UK and USA (Table S6.1). As expected, odds ratios are larger than risk ratios. The association is stronger in the higher quality and larger studies. The very high heterogeneity between studies is not relieved by any of the sub-group variable nor by excluding studies with a lower quality rating.

Table S6.1 Summary statistics from the meta-analyses of females relative to males, including sub-group and sensitivity analyses

|                            | Reference category | No. of studies | Pooled risk ratio | I <sup>2</sup> , heterogeneity test p-value |
|----------------------------|--------------------|----------------|-------------------|---------------------------------------------|
| Sex                        | Male               | 15             | 1.28 (1.10,1.50)  | 99.8%, p<0.001                              |
| Subgroup by outcome        |                    |                |                   |                                             |
| - BMI assessment           | Male               | 8              | 1.27 (1.02,1.58)  | 99.9%, p<0.001                              |
| - BMI diagnosis assessment | Male               | 6              | 1.34 (0.87,2.05)  | 95.0%, p<0.001                              |
| Subgroup by ratio measure  |                    |                |                   |                                             |
| - odds ratio               | Male               | 11             | 1.45 (1.21,1.74)  | 99.5%, p<0.001                              |
| - risk ratio               | Male               | 4              | 1.18 (1.04,1.35)  | 99.7%, p<0.001                              |
| Subgroup by country        |                    |                |                   |                                             |
| - Australia                | Male               | 3              | 0.99 (0.79,1.25)  | 87.2%, p<0.001                              |
| - UK                       | Male               | 3              | 1.27 (1.02,1.60)  | 100%, p<0.001                               |
| - USA                      | Male               | 6              | 1.33 (1.20,1.48)  | 97.0%, p<0.001                              |
| - Other                    | Male               | 3              | 1.32 (0.81,2.16)  | 91.2%, p<0.001                              |
| Sensitivity by quality     |                    |                |                   |                                             |
| - High quality             | Male               | 10             | 1.45 (1.21,1.74)  | 99.6%, p<0.001                              |

The Funnel plot (Figure S6.1) and Egger's test (p=0.905) reveal no statistically significant evidence of reporting bias.

Figure S6.1 Funnel plot of sex as a predictor of BMI assessment

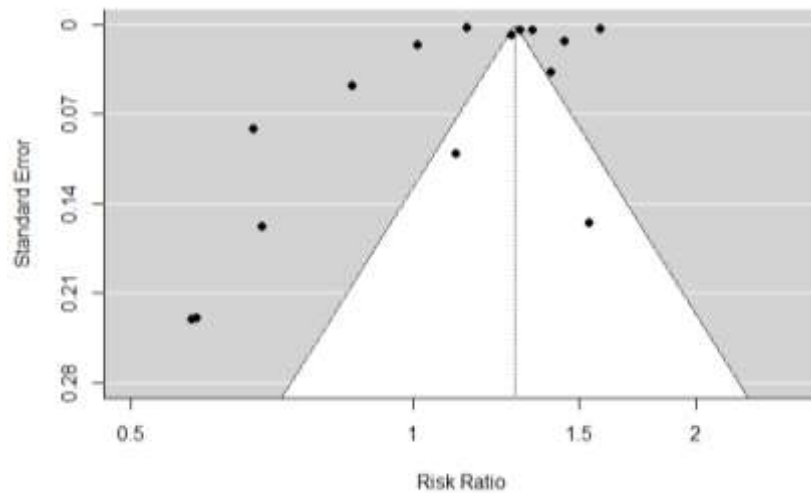

### S6.2 Age as a predictor of BMI assessment

Age categories varied between studies. For meta-analysis the rate of BMI assessment in the age group closest to or including 65 years relative to the age group closest to or including 30 age group are identified and pooled. The actual results pooled were the BMI assessment for 65 or more years relative to 18-29 years,[65 84] 65 or more years relative to 18-39 years,[69] 65-74 years relative to 18-24 years,[66 68] 65-74 years relative to 18-44 years,[72] 60-69 years relative to 18-29 years,[64 78] 61-67 years relative to 31-40 years,[83] 60 or more years relative to 30-44 years,[67] 56-74 years relative to 19-44 years,[82] and 55 or more years relative to less than 55 years.[76]

One study[75] presented results for age as a continuous variable and another[70] presented results for sex by age categories. Neither could not be included in the meta-analysis.

There is no statistically significant evidence that the rate of BMI assessment differs between the older and younger age groups (Table S6.2). The only statistically significant result occurs in the 'other countries' category in which a study from Israel[76] is combined with a study from Germany,[67] both of which recorded a statistically significant increased rate of BMI assessment in the older age group. The Funnel plot (Figure S6.2) and Egger's test ( $p=0.348$ ) reveal no evidence of reporting bias.

There is very high heterogeneity between studies. This is not alleviated by any of the grouping variables or by the exclusion of studies with a lower quality rating.

Table S6.2 Summary statistics from the meta-analyses of oldest age group relative to youngest, including sub-group and sensitivity analyses

|                          | Reference category  | No. of studies | Pooled ratio     | I <sup>2</sup> , heterogeneity test p-value |
|--------------------------|---------------------|----------------|------------------|---------------------------------------------|
| Age                      | Closest to 30 years | 12             | 0.90 (0.50,1.63) | 100%, p<0.001                               |
| Subgroup by outcome      |                     |                |                  |                                             |
| - recorded BMI           | Closest to 30 years | 8              | 1.21 (0.82,1.78) | 99.8%, p<0.001                              |
| - recorded BMI diagnosis | Closest to 30 years | 4              | 0.52 (0.25,1.05) | 83.3%, p<0.001                              |
| Subgroup by country      |                     |                |                  |                                             |
| - Australia              | Closest to 30 years | 3              | 1.11 (0.98,1.26) | 83.6%, p=0.002                              |
| - UK                     | Closest to 30 years | 3              | 1.22 (0.78,1.90) | 99.9%, p<0.001                              |
| - USA                    | Closest to 30 years | 4              | 0.53 (0.24,1.17) | 99.4%, p<0.001                              |
| - Other                  | Closest to 30 years | 2              | 2.61 (1.73,3.95) | 0%, p=0.836                                 |
| Sensitivity by quality   |                     |                |                  |                                             |
| - High quality           | Closest to 30 years | 9              | 0.69 (0.19,2.48) | 100%, p<0.001                               |

The funnel plot shown in Figure S6.2 confirms high heterogeneity (many studies outside the central funnel) but provides no evidence of publication bias. Egger's test also returned no statistically significant evidence of small study bias ( $p=0.348$ ).

Figure S6.2 Funnel plot of age group as a predictor of BMI assessment



### S6.3 Race/ethnicity as a predictor of BMI assessment

Results were provided by race/ethnicity group in nine studies, but the classification used varied considerable between studies and countries. For example, one study from the UK classified ethnic groups as White, Indian, Bangladeshi, Pakistani, Chinese, Other Asian, Black African, Black Caribbean, Other Black, Other, Mixed Race or Unknown[78] while a US study used a very different classification of White, Asian, Black, Hispanic, Native American, Multi-race, and Other.[77]

In the meta-analysis the race/ethnicity categories 'White' and 'Caucasian' were regarded as equivalent. The reference category was 'White' or 'Caucasian' [84] for eight of the nine studies. Three of these[69 80 84] defined a single comparator group 'Other' or 'non-Caucasian'. Five had multiple comparator race/ethnicity categories which we combined into a



single 'Non-White' category using the method in another.[88] One study[75] defined 'Black' as the reference category. We inverted the results for 'White' compared to 'Black' but as the remaining categories 'Hispanic' or 'Other' were only compared to 'Black' we could not include them in the 'White' against 'Non-White' meta-analysis.

Meta-analyses revealed statistically significant evidence that BMI assessment is more common in people of non-White race/ethnicity than in White race/ethnicity overall, particularly when BMI is recorded as a diagnosis (Table S6.3). The effect size may be marginally stronger in the higher quality studies, though the smaller sample size leads to wider confidence intervals. There are very high levels of heterogeneity between the studies, and this is not alleviated by sub-groups or exclusion of studies with lower quality scores.

Table S6.3 Summary statistics from the meta-analyses of non-White relative to White race/ethnicity, including sub-group and sensitivity analyses

|                            | Reference category | No. of studies | Pooled risk ratio | I <sup>2</sup> , heterogeneity test p-value |
|----------------------------|--------------------|----------------|-------------------|---------------------------------------------|
| Race/ethnicity             | White              | 9              | 1.27 (1.03,1.57)  | 99.6%, p<0.001                              |
| Subgroup by outcome        |                    |                |                   |                                             |
| - BMI assessment           | White              | 4              | 1.10 (0.97,1.25)  | 99.1%, p<0.001                              |
| - BMI diagnosis assessment | White              | 5              | 1.43 (0.78,2.61)  | 82.2%, p<0.001                              |
| Sensitivity by quality     |                    |                |                   |                                             |
| - High quality             | White              | 6              | 1.36 (0.86,2.16)  | 99.5%, p<0.001                              |

The Funnel plot (Figure S6.3) suggests a tendency for smaller studies to find that non-Whites have lower rates of BMI assessment than Whites. As there are less than 10 studies, Egger's test at p=0.083 may be underpowered.

Figure S6.3 Funnel plot of race/ethnicity as a predictor of BMI assessment

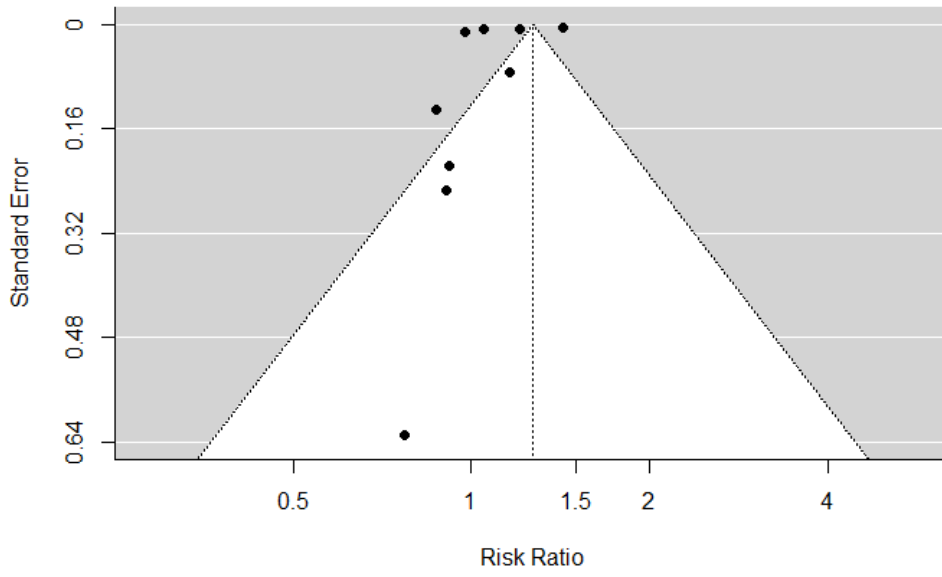

1  
2  
3  
4  
5  
6  
7  
8  
9  
10  
11  
12  
13  
14  
15  
16  
17  
18  
19  
20  
21  
22  
23  
24  
25  
26  
27  
28  
29  
30  
31  
32  
33  
34  
35  
36  
37  
38  
39  
40  
41  
42  
43  
44  
45  
46  
47  
48  
49  
50  
51  
52  
53  
54  
55  
56  
57  
58  
59  
60

### S6.4 Deprivation as a predictor of BMI assessment

All four studies reporting relative rates of BMI assessment across socio-economic groups were from the UK.[68 70 71] All used postcode-based Indexes of Multiple Deprivation, although version differed.

The pooled results (Table S6.4) provide statistically significant evidence that BMI assessment was more likely among those with most compared with least deprivation, although heterogeneity was high. Given the small number of studies, sub-group and sensitivity analyses are not pursued.

Table S6.4 Summary statistics from the meta-analysis of greatest deprivation relative to least

|                   | Reference category | No. of studies | Pooled risk ratio | I <sup>2</sup> , heterogeneity test p-value |
|-------------------|--------------------|----------------|-------------------|---------------------------------------------|
| Deprivation index | Least              | 4              | 1.21 (1.18,1.24)  | 73.9%, p=0.009                              |

### S6.5 Health insurance status as a predictor of BMI assessment

Five of the 6 studies reporting insurance status as a predictor of BMI assessment used 'private' insurance as the reference category. The remaining study[75] could not be include in the meta-analysis as the reference category was unclear, but was not 'private'. Two studies compared 'Private' to 'Not private'. [65 84] The remaining three studies [63 64 69] had multiple comparator categories ('Medicare', 'Medicaid', 'Other', 'Self-Pay/None') which we combined into a single 'Not private' category using the method in another study. [88]

The pooled results (Table S6.5) provide no evidence of association between health insurance status and BMI assessment.

Table S6.5 Summary statistics from the meta-analysis of non-private against private health insurance

|                  | Reference category | No. of studies | Pooled risk ratio | I <sup>2</sup> , heterogeneity test p-value |
|------------------|--------------------|----------------|-------------------|---------------------------------------------|
| Insurance status | Private            | 5              | 1.01 (0.83,1.23)  | 95.3%, p<0.001                              |

### S6.6 BMI category as a predictor of BMI assessment

The different studies compared BMI assessment rates across varying BMI-based weight categories. The meta-analysis pools the comparisons of the heaviest available weight group to the lightest available group. These comparison groups were ‘BMI 40+’ relative to ‘BMI 25-29.9’, [66 69] ‘BMI 40+’ relative to ‘BMI 30-34.9’, [65] ‘BMI 40+’ relative to ‘BMI <40’, [75] ‘BMI 35+’ relative to ‘BMI 18.5-24.99’, [78] ‘BMI 30+’ relative to ‘BMI <30’, [76] and ‘BMI 30+’ relative to ‘BMI 25-29.9’. [81 83]

The results of the meta-analyses are presented in Table S6.6. There is very high heterogeneity between the studies. The overall pooled risk ratio is suggestive of an increased rate of BMI assessment among heavier patients, but statistical significance is not reached. The differences between higher and lower weight categories appear to be greater when BMI is being recorded as a diagnosis and when analyses are restricted to studies with the highest quality rating score. However, high heterogeneity and correspondingly wide confidence intervals negate definitive interpretations.

Table S6.6 Summary statistics from the meta-analyses of those in the highest BMI category relative to those in the lowest, including sub-group and sensitivity analyses

|                            | Reference category | No. of studies | Pooled risk ratio | I <sup>2</sup> , heterogeneity test p-value |
|----------------------------|--------------------|----------------|-------------------|---------------------------------------------|
| BMI category               | Lowest             | 8              | 1.55 (0.99,2.45)  | 99.6%, p<0.001                              |
| Subgroup by outcome        |                    |                |                   |                                             |
| - BMI assessment           | Lowest             | 4              | 1.55 (1.06,2.26)  | 99.8%, p<0.001                              |
| - BMI diagnosis assessment | Lowest             | 4              | 3.53 (0.30,40.9)  | 99.3%, p<0.001                              |
| Sensitivity by quality     |                    |                |                   |                                             |
| - High quality             | Lowest             | 4              | 2.56 (0.45,14.6)  | 99.3%, p<0.001                              |

1  
2  
3 The funnel plot, Figure S6.6, again shows that some of the smaller studies reported relatively  
4 high risk ratios for BMI assessment in the heavier group. However, this pattern is not  
5 completely consistent, and the small number of studies precludes formal hypothesis testing for  
6 bias.  
7  
8  
9  
10 bias.  
11  
12

13 Figure S6.6 Funnel plot of BMI category as a predictor of BMI assessment  
14  
15

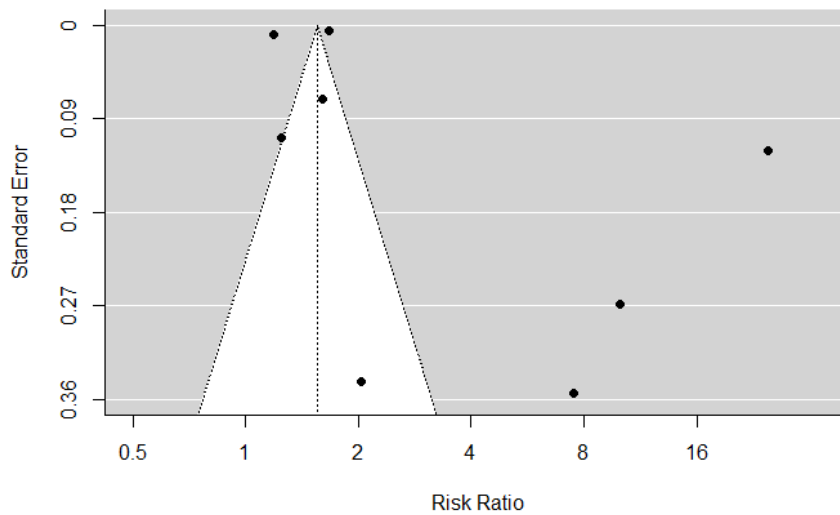

### S6.7 Smoking status as a predictor of BMI assessment

Only three studies reported the relative rate of BMI assessment by smoking status.[66 78 83]

The meta-analysis report results of current smokers relative to never smokers. There was high heterogeneity between the three studies and no evidence of association between smoking status and BMI assessment (Table S6.7). Given the small number of studies, sub-group and sensitivity analyses were not pursued.

Table S6.7 Summary statistics from the meta-analysis of greatest deprivation relative to least

|                | Reference category | No. of studies | Pooled risk ratio | I <sup>2</sup> , heterogeneity test p-value |
|----------------|--------------------|----------------|-------------------|---------------------------------------------|
| Smoking status | Non smoker         | 3              | 1.01 (0.90,1.14)  | 98.3%, p<0.001                              |

### S6.8 The number of comorbidities as a predictor of BMI assessment

In this meta-analysis we have equated the terms ‘Obesity-related comorbidities’,[64] ‘Comorbid conditions’,[67] ‘Multimorbidity’,[68] ‘Disease counts’,[72] ‘Chronic condition’,[83] ‘Charlson comorbidity index’,[77] and ‘Number of diagnoses recorded’[82] to ‘Comorbidities’. The comparison of the relative frequency of BMI assessment comparing the highest comorbidity class with the lowest are pooled in the meta-analysis. The actual comparisons pooled are 5+ relative to 0,[67 78] 3+ relative to 0,[64 72 82] 2+ relative to 0-1,[68] at least one comorbidity present relative to absent,[74 83] Charlson comorbidity index of 5+ relative to 0,[77] and ‘very high’ relative to ‘lower’[65] based on the presence of absence of specific diagnosis codes.

One study[75] analysed the number of comorbidities as a numeric variable and could not be included in the current meta-analysis.

The meta-analysis provides statistically significant evidence that BMI assessment is more common in those in the highest number of comorbidities category, as compared to those in the low comorbidity category (Table S6.8). This effect can be seen in all subgroups and the association is slightly stronger in the higher quality studies (Table S6.8). The clinical magnitude of this association cannot be resolved due to the very high levels of heterogeneity overall and within each sub-group. The Funnel plot (Figure S6.8) and Egger's test ( $p=0.932$ ) reveal no consistent evidence of reporting bias.

Table S6.8 Summary statistics from the meta-analyses of most comorbidities relative to least, including sub-group and sensitivity analyses

|                            | <b>Reference category</b> | <b>No. of studies</b> | <b>Pooled risk ratio</b> | <b>I<sup>2</sup>, heterogeneity test p-value</b> |
|----------------------------|---------------------------|-----------------------|--------------------------|--------------------------------------------------|
| Number of comorbidities    | Fewest                    | 10                    | 2.11 (1.60,2.79)         | 99.6%, $p<0.001$                                 |
| Subgroup by outcome        |                           |                       |                          |                                                  |
| - BMI assessment           | Fewest                    | 7                     | 2.16 (1.58,2.96)         | 99.6%, $p<0.001$                                 |
| - BMI diagnosis assessment | Fewest                    | 3                     | 1.75 (0.33,9.20)         | 98.8%, $p<0.001$                                 |
| Subgroup by country        |                           |                       |                          |                                                  |
| - Australia                | Fewest                    | 2                     | 1.98 (0.51,7.63)         | 99.5%, $p<0.001$                                 |
| - UK                       | Fewest                    | 2                     | 2.19 (1.56,3.07)         | 99.9%, $p<0.001$                                 |
| - USA                      | Fewest                    | 3                     | 1.72 (1.68,1.75)         | 0%, $p=0.783$                                    |
| - Other                    | Fewest                    | 3                     | 4.09 (2.18,7.66)         | 94.1%, $p<0.001$                                 |
| Sensitivity by quality     |                           |                       |                          |                                                  |
| - High quality             | Fewest                    | 7                     | 2.30 (1.53,3.45)         | 99.5%, $p<0.001$                                 |



Figure S6.8 Funnel plot of number of comorbidities as a predictor of BMI assessment

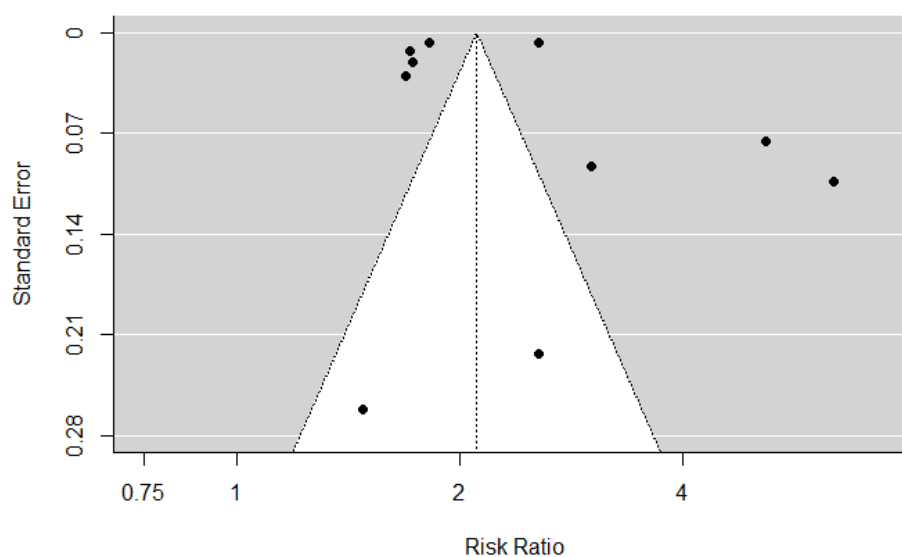

### S6.9 Cardiovascular disease as a predictor of BMI assessment

This meta-analysis has combined the terms ‘Diagnosis with vascular complications’[67] and ‘Presence of heart disease’[84] with ‘Cardio-vascular disease’. All studies reported the assessment of BMI in the cardiovascular disease group relative to those without cardiovascular disease.

The pooled risk ratios from the meta-analyses and associated 95% confidence intervals summarised in Table S6.9 do not provide any statistically significant evidence of association between the presence of cardiovascular disease and the assessment of BMI.

Table S6.9 Summary statistics from the meta-analyses of those with cardio-vascular disease relative to those without, including sub-group and sensitivity analyses

|                            | Reference category | No. of studies | Pooled risk ratio | I <sup>2</sup> , heterogeneity test p-value |
|----------------------------|--------------------|----------------|-------------------|---------------------------------------------|
| Cardiovascular disease     | No                 | 7              | 0.94 (0.81,1.10)  | 98.0%, p<0.001                              |
| Subgroup by outcome        |                    |                |                   |                                             |
| - BMI assessment           | No                 | 4              | 0.99 (0.78,1.24)  | 95.3%, p<0.001                              |
| - BMI diagnosis assessment | No                 | 3              | 0.93 (0.31,2.80)  | 98.9%, p<0.001                              |

|                                          |    |   |                  |                |
|------------------------------------------|----|---|------------------|----------------|
| Sensitivity by quality<br>- High quality | No | 4 | 0.93 (0.71,1.23) | 96.4%, p<0.001 |
|------------------------------------------|----|---|------------------|----------------|

The funnel plot presented in Figure S6.9 shows high outliers to the right of most studies but as the number of studies is less than 10, we have not proceeded with testing for publication bias.

Figure S6.9 Funnel plot of cardiovascular disease as a predictor of BMI assessment

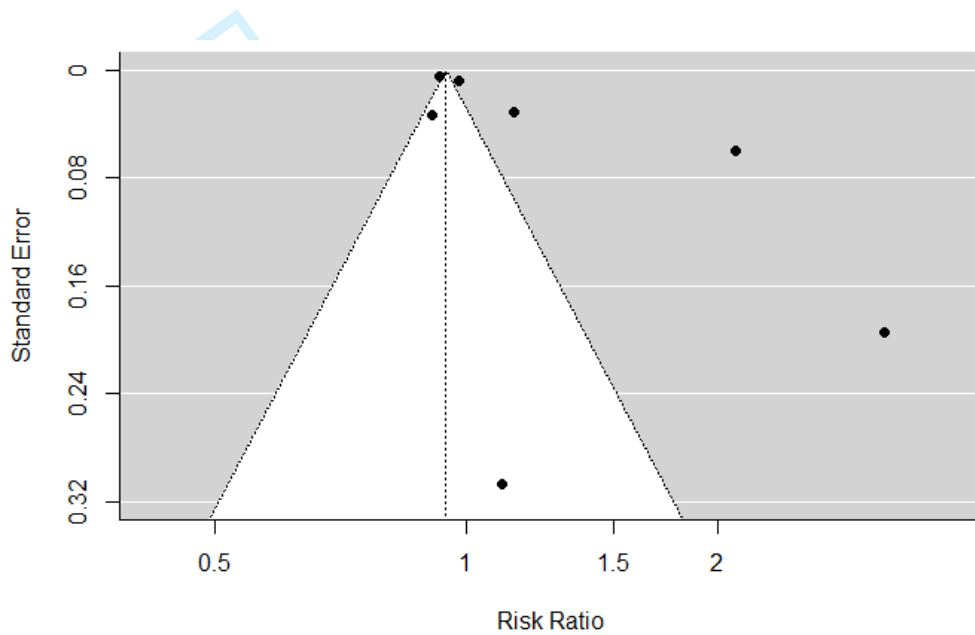

### S6.10 Diabetes as a predictor of BMI assessment

The assessment of BMI among those with a diagnosis of diabetes was compared to the assessment of BMI among those without in 9 studies. The meta-analysis results are summarised in Table S6.10. Overall, there is insufficient evidence to conclude the BMI assessment differs between those with and those without diabetes, with the very high heterogeneity between the studies contributing uncertainty. However, subgroup analyses suggest a statistically significant increase in BMI assessment for Australian patients with diabetes, consistent across all 3 studies ( $I^2=0\%$ ) and statistically significant increase in BMI assessment in the 4 studies where BMI was recorded as a diagnosis, also with low heterogeneity ( $I^2=30.8\%$ ).

Table S6.10 Summary statistics from the meta-analyses of those with diabetes relative to those without, including sub-group and sensitivity analyses

|                            | Reference category | No. of studies | Pooled risk ratio | $I^2$ , heterogeneity test p-value |
|----------------------------|--------------------|----------------|-------------------|------------------------------------|
| Diabetes                   | No                 | 9              | 1.19 (0.93,1.52)  | 99.0%, $p<0.001$                   |
| Subgroup by outcome        |                    |                |                   |                                    |
| - BMI assessment           | No                 | 5              | 1.10 (0.48,2.52)  | 99.4%, $p<0.001$                   |
| - BMI diagnosis assessment | No                 | 4              | 1.24 (1.04,1.48)  | 30.8%, $p=0.227$                   |
| Subgroup by country        |                    |                |                   |                                    |
| - Australia                | No                 | 3              | 1.84 (1.75,1.93)  | 0%, $p=0.841$                      |
| - USA                      | No                 | 4              | 1.17 (0.99,1.40)  | 99.2%, $p<0.001$                   |
| - Other                    | No                 | 2              | 8.63 (3.42,21.8)  | 79.4%, $p=0.028$                   |
| Sensitivity by quality     |                    |                |                   |                                    |
| - High quality             | No                 | 7              | 1.26 (0.66,2.41)  | 98.4% ( $p<0.001$ )                |

The funnel plot (Figure S6.10) shows most of the smaller studies falling to the right of the expected range. Egger's test returns a highly statistically significant result ( $p=0.004$ ) but, given there are less than 10 studies, some care is warranted in the interpretation of this result.

Figure S6.10 Funnel plot of diabetes as a predictor of BMI assessment

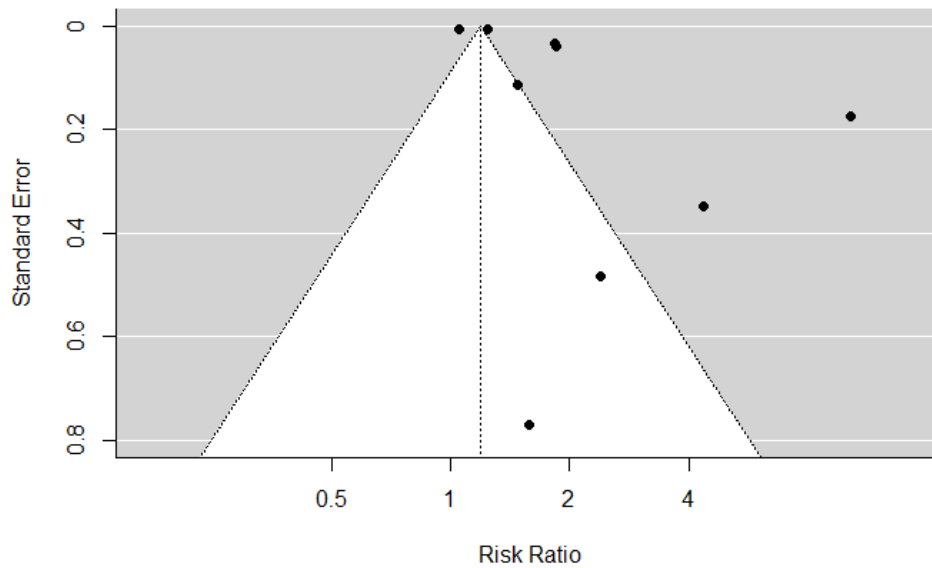

### S6.11 Dyslipidaemia disease as a predictor of BMI assessment

For the meta-analysis the presence of 'Hyperlipidaemia'[69 72 82] and 'Presence of cholesterol' [84] were combined with 'Dyslipidaemia'. [77] The overall meta-analysis (Table S6.11) provides insufficient evidence to conclude the BMI assessment differs between those with and those without dyslipidaemia, with the very high heterogeneity between the studies. However, subgroup analyses suggest a statistically significant increase in BMI assessment for Australian patients with dyslipidaemia and where BMI was recorded as a diagnosis. There is still considerable heterogeneity between studies even within these sub-groups ( $I^2=80.6\%$  and  $I^2=50.9\%$  respectively) also with low heterogeneity ( $I^2=30.8\%$ ). Restricting analyses to studies with the highest quality ranking produced statistically significant evidence of effect and decreased heterogeneity between the remaining studies ( $I^2=57.3\%$ ).

S6.11 Summary statistics from the meta-analyses of those with dyslipidaemia relative to those without, including sub-group and sensitivity analyses

|                            | Reference category | No. of studies | Pooled risk ratio | $I^2$ , heterogeneity test p-value |
|----------------------------|--------------------|----------------|-------------------|------------------------------------|
| Dyslipidaemia              | No                 | 6              | 1.12 (0.92,1.37)  | 99.5%, p<0.001                     |
| Subgroup by outcome        |                    |                |                   |                                    |
| - BMI assessment           | No                 | 3              | 0.99 (0.76,1.30)  | 98.2%, p<0.001                     |
| - BMI diagnosis assessment | No                 | 3              | 1.21 (1.03,1.42)  | 50.9%, p=0.131                     |
| Subgroup by country        |                    |                |                   |                                    |

|                        |    |   |                  |                |
|------------------------|----|---|------------------|----------------|
| - Australia            | No | 3 | 1.21 (1.08,1.36) | 80.6% p=0.059  |
| - USA                  | No | 3 | 1.12 (0.90,1.39) | 99.8%, p<0.001 |
| Sensitivity by quality |    |   |                  |                |
| - High quality         | No | 4 | 1.21 (1.15,1.28) | 57.3%, p=0.071 |

The funnel plot (Figure S6.11) shows most studies are equivalent size with the two smaller studies both reporting an increase in BMI assessment among people with dyslipidaemia. There are insufficient studies to allow statistical testing of this association.

Figure S6.11 Funnel plot of dyslipidaemia as a predictor of BMI assessment

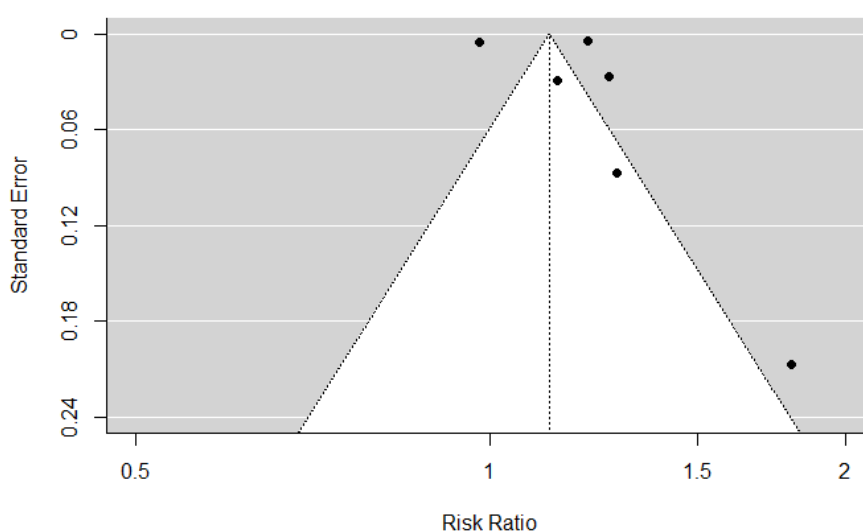

### S6.12 Hypertension as a predictor of BMI assessment

For this meta-analysis 'Presence of high blood pressure'[84] was regarded as equivalent to 'Hypertension' and 'Hypertensive'. The pattern of results is like those from the previous chronic comorbidities meta-analyses. The overall meta-analysis (Table S6.12) suffered very high heterogeneity and fell short of statistical significance. However, subgroup analyses partially alleviated the heterogeneity and suggested a statistically significant increase in BMI assessment both for Australian patients with hypertension and where BMI was recorded as a diagnosis. Restricting analyses to studies with the highest quality rating allowed a statistically significant result but failed to address the heterogeneity between studies.

Figure S6.12 Summary statistics from the meta-analyses of those with hypertension relative to those without, including sub-group and sensitivity analyses

|                     | Reference category | No. of studies | Pooled risk ratio | I <sup>2</sup> , heterogeneity test p-value |
|---------------------|--------------------|----------------|-------------------|---------------------------------------------|
| Hypertension        | No                 | 10             | 1.17 (0.98,1.40)  | 99.5%, p<0.001                              |
| Subgroup by outcome | No                 | 6              | 1.11 (0.83,1.48)  | 99.7%, p<0.001                              |
| - BMI assessment    | No                 | 4              | 1.24 (1.20,1.28)  | 2.2%, p=0.382                               |
| Subgroup by country | No                 | 3              | 1.15 (1.05,1.26)  | 69.4%, p=0.038                              |
| - Australia         | No                 | 2              | 1.33 (0.39,4.54)  | 99.4%, p<0.001                              |
| - UK                | No                 | 4              | 1.14 (0.91,1.43)  | 99.8%, p<0.001                              |
| - USA               | No                 | 1              | 3.20 (1.71,5.99)  | n.a.                                        |
| - Other             | No                 | 8              | 1.26 (1.10,1.43)  | 97.7%, p<0.001                              |

The funnel plot, Figure S6.12, again shows that some of the smaller studies report relatively high risk ratios for BMI assessment in the hypertensive group. However, there are exceptions and Egger’s test returned no statistically significant evidence of bias (p=0.293).

Figure S6.12 Funnel plot of hypertension as a predictor of BMI assessment

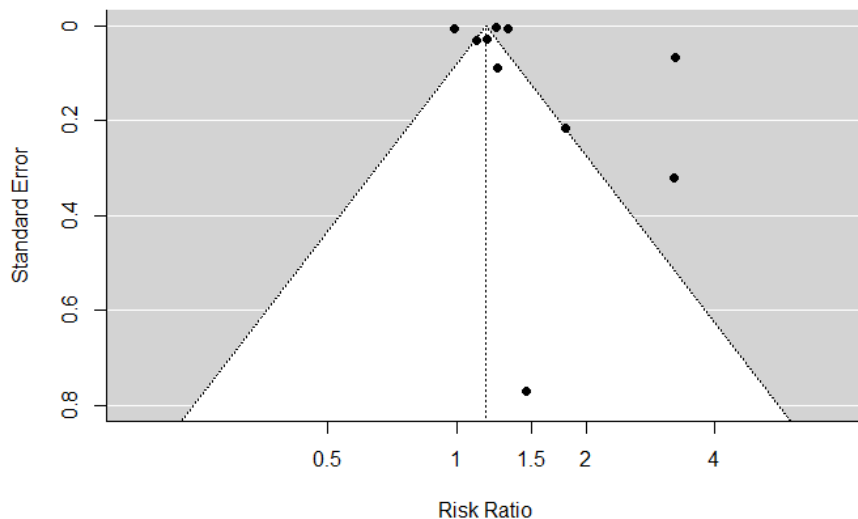

S6.13 Mental illness as a predictor of BMI assessment

Three studies compared the rate of BMI reporting for those with ‘mental illness’, [72] ‘serious mental illness’, [68] or ‘severe mental illness’ [79] to those without. These studies returned

strongly heterogeneous results ( $I^2=99.6\%$ ) and the pooled risk ratio (Table S6.13) did not provide any statistically significant evidence of association between mental illness and BMI assessment.

Table S6.13 Summary statistics from the meta-analysis of those with mental illness relative to those without

|                | Reference category | No. of studies | Pooled risk ratio | $I^2$ , heterogeneity test p-value |
|----------------|--------------------|----------------|-------------------|------------------------------------|
| Mental illness | Not present        | 3              | 1.16 (0.79,1.70)  | 99.6%, $p<0.001$                   |

#### S6.14 Depression as a predictor of BMI assessment

Three studies compared the rate of BMI reporting for those with ‘depression’, [75 77] or ‘depression and anxiety’ [82] to those without. These studies returned strongly heterogeneous results ( $I^2=98.7\%$ ) and the pooled risk ratio (Table S6.14) did not provide statistically significant evidence of association between mental illness and BMI assessment.

Table S6.14 Summary statistics from the meta-analysis of those with depression relative to those without

|            | Reference category | No. of studies | Pooled risk ratio | $I^2$ , heterogeneity test p-value |
|------------|--------------------|----------------|-------------------|------------------------------------|
| Depression | Not present        | 3              | 1.22 (0.85,1.74)  | 98.7%, $p<0.001$                   |

## Supplementary Section S7: References

1. Benson C, Kisely S, Korman N, Moss K. Compliance of metabolic monitoring at rehabilitation facilities. *Australasian Psychiatry* 2018;**26**(1):41-46 doi: <http://dx.doi.org/10.1177/1039856217737899>[published Online First: Epub Date]].
2. Bleich SN, Bennett WL, Gudzone KA, Cooper LA. Impact of physician BMI on obesity care and beliefs. *Obesity* 2012;**20**(5):999-1005 doi: <https://dx.doi.org/10.1038/oby.2011.402>[published Online First: Epub Date]].
3. Bocquier A, Verger P, Basdevant A, Andreotti G, Baretge J, Villani P, Paraponaris A. Overweight and obesity: knowledge, attitudes, and practices of general practitioners in france. *Obesity Research* 2005;**13**(4):787-95
4. Campbell K, Engel H, Timperio A, Cooper C, Crawford D. Obesity management: Australian general practitioners' attitudes and practices. *Obesity Research* 2000;**8**(6):459-66
5. Fruh SM, Golden A, Graves RJ, Hall HR, Minchew LA, Williams S. Advanced Practice Nursing student knowledge in obesity management: A mixed methods research study. *Nurse Education Today* 2019;**77**:59-64 doi: 10.1016/j.nedt.2019.03.006[published Online First: Epub Date]].
6. Hauff C, Fruh SM, Sims BM, Williams SG, Herf C, Golden A, Graves RJ, Minchew LA, Hall HR. Nurse practitioner students' observations of preceptor engagement in obesity management and weight bias: A mixed-methods approach. *Journal of the American Association of Nurse Practitioners* 2020;**32**(7):520-29 doi: <http://dx.doi.org/10.1097/JXX.000000000000440>[published Online First: Epub Date]].



- 1  
2  
3 7. Huber CA, Mohler-Kuo M, Zellweger U, Zoller M, Rosemann T, Senn O. Obesity  
4  
5 management and continuing medical education in primary care: results of a Swiss  
6  
7 survey. BMC Family Practice 2011;**12**:140 doi: [https://dx.doi.org/10.1186/1471-](https://dx.doi.org/10.1186/1471-2296-12-140)  
8  
9 [2296-12-140](https://dx.doi.org/10.1186/1471-2296-12-140)[published Online First: Epub Date]].  
10  
11
- 12 8. Hyer S, Edwards J. Weight Management Practices Among Florida Nurse Practitioners: A  
13  
14 Cross-Sectional Study. Journal for Nurse Practitioners 2020;**16**(2):131-35 doi:  
15  
16 10.1016/j.nurpra.2019.10.025[published Online First: Epub Date]].  
17  
18
- 19 9. Laidlaw A, Napier C, Neville F, Collinson A, Cecil JE. Talking about weight talk: primary  
20  
21 care practitioner knowledge, attitudes and practice. Journal of Communication in  
22  
23 Healthcare 2019;**12**(3/4):145-53 doi: 10.1080/17538068.2019.1646061[published  
24  
25 Online First: Epub Date]].  
26  
27
- 28 10. McLaughlin JC, Hamilton K, Kipping R. Epidemiology of adult overweight recording  
29  
30 and management by UK GPs: a systematic review. Br J Gen Pract  
31  
32 2017;**67**(663):e676-e83 doi: 10.3399/bjgp17X692309[published Online First: Epub  
33  
34 Date]].  
35  
36
- 37 11. Ruser CB, Sanders L, Brescia GR, Talbot M, Hartman K, Vivieros K, Bravata DM.  
38  
39 Identification and management of overweight and obesity by internal medicine  
40  
41 residents. Journal of General Internal Medicine 2005;**20**(12):1139-41  
42  
43
- 44 12. Sebiany AM. Primary care physicians' knowledge and perceived barriers in the  
45  
46 management of overweight and obesity. J Family Community Med 2013;**20**(3):147-  
47  
48 52 doi: <https://dx.doi.org/10.4103/2230-8229.121972>[published Online First: Epub  
49  
50 Date]].  
51  
52
- 53 13. Smith K, James K, Standard-Goldson A. Adult obesity: Management practices of general  
54  
55 practitioners/ family physicians in Kingston and St Andrew, Jamaica. West Indian  
56  
57  
58  
59  
60

- 1  
2  
3 Medical Journal 2018;**67**(5):433-38 doi:  
4  
5 <http://dx.doi.org/10.7727/wimj.2018.184>[published Online First: Epub Date]].  
6  
7  
8 14. Smith PD, O'Halloran P, Hahn DL, Grasmick M, Radant L. Screening for obesity:  
9  
10 clinical tools in evolution, a WREN study. *Wmj* 2010;**109**(5):274-78  
11  
12 15. Sze Y, Dixon L, Paterson H, Campbell N. New Zealand LMC midwives' approaches to  
13  
14 discussing nutrition, activity and weight gain during pregnancy. *New Zealand College*  
15  
16  
17 of Midwives Journal 2014(50):24-29 doi: 10.12784/nzcomjn150.2014.4.24-  
18  
19 29[published Online First: Epub Date]].  
20  
21 16. Critchlow N, Rosenberg G, Rungay H, Petty R, Vohra J. Weight assessment and the  
22  
23 provision of weight management advice in primary care: a cross-sectional survey of  
24  
25 self-reported practice among general practitioners and practice nurses in the United  
26  
27 Kingdom. *BMC Family Practice* 2020;**21**(1):1-12 doi: 10.1186/s12875-020-01184-  
28  
29 z[published Online First: Epub Date]].  
30  
31 17. Jimenez G, Tyagi S, Car J. Computer-assisted history taking for the improvement of the  
32  
33 diabetes primary care consultation. *Diabetes Technology and Therapeutics*  
34  
35 2020;**22**(Supplement 1):A156-A57 doi:  
36  
37 <http://dx.doi.org/10.1089/dia.2020.2525.abstracts>[published Online First: Epub  
38  
39 Date]].  
40  
41  
42 18. Fruh SM, Golden A, Graves RJ, Hall HR, Minchew LA, Williams S. Advanced Practice  
43  
44 Nursing student knowledge in obesity management: A mixed methods research study.  
45  
46  
47 Nurse education today 2019;**77**:59-64  
48  
49  
50 19. Nanda S, Adusumalli J, Hurt RT, Ghosh K, Fischer KM, Hagenbrock MC, Ganesh R,  
51  
52 Ratrout BM, Raslau D, Schroeder DR, Wight EC, Kuhle CL, Thicke LA, Lazik N,  
53  
54 Croghan IT. Obesity Management Education Needs Among General Internists: A  
55  
56 Survey. *Journal of primary care & community health* 2021;**12**:21501327211013292  
57  
58  
59  
60

- 1  
2  
3 20. Baillargeon JP, St-Cyr-Tribble D, Xhignesse M, Brown C, Carpentier AC, Fortin M,  
4  
5 Grant A, Simoneau-Roy J, Langlois MF. Impact of an educational intervention  
6  
7 combining clinical obesity preceptorship with electronic networking tools on primary  
8  
9 care professionals: a prospective study. BMC Medical Education 2020;**20**(1):361 doi:  
10  
11 <https://dx.doi.org/10.1186/s12909-020-02248-5>[published Online First: Epub Date]].  
12  
13  
14  
15 21. Barnes ER, Theeke LA, Mallow J. Impact of the Provider and Healthcare team  
16  
17 Adherence to Treatment Guidelines ( PHAT- G) intervention on adherence to national  
18  
19 obesity clinical practice guidelines in a primary care centre. Journal of Evaluation in  
20  
21 Clinical Practice 2015;**21**(2):300-06 doi: 10.1111/jep.12308[published Online First:  
22  
23 Epub Date]].  
24  
25  
26 22. Berry AC, Berry NA, Myers TS, Reznicek J, Berry BB. Physician Body Mass Index and  
27  
28 Bias Toward Obesity Documentation Patterns. Ochsner Journal 2018;**18**(1):66-71  
29  
30  
31 23. Bleich SN, Gudzone KA, Bennett WL, Jarlenski MP, Cooper LA. How does physician  
32  
33 BMI impact patient trust and perceived stigma? Preventive Medicine 2013;**57**(2):120-  
34  
35 24 doi: 10.1016/j.ypmed.2013.05.005[published Online First: Epub Date]].  
36  
37  
38 24. Bronder KL, Dooyema CA, Onufrak SJ, Foltz JL. Electronic health records to support  
39  
40 obesity-related patient care: Results from a survey of United States physicians.  
41  
42 Preventive Medicine 2015;**77**:41-47 doi: 10.1016/j.ypmed.2015.04.018[published  
43  
44 Online First: Epub Date]].  
45  
46  
47 25. Engstrom M, Skytt B, Ernesater A, Flackman B, Mamhidir AG. District nurses' self-  
48  
49 reported clinical activities, beliefs about and attitudes towards obesity management.  
50  
51 Applied Nursing Research 2013;**26**(4):198-203 doi:  
52  
53 <https://dx.doi.org/10.1016/j.apnr.2013.06.009>[published Online First: Epub Date]].  
54  
55  
56 26. Forster AS, Burgess C, Dodhia H, Fuller F, Miller J, McDermott L, Gulliford MC. Do  
57  
58 health checks improve risk factor detection in primary care? Matched cohort study  
59  
60

- 1  
2  
3 using electronic health records. *Journal of Public Health* 2016;**38**(3):552-59 doi:  
4  
5 10.1093/pubmed/fdv119[published Online First: Epub Date]].  
6  
7  
8 27. Trujillo-Garrido N, Bernal-Jimenez MA, Santi-Cano MJ. Evaluation of Obesity  
9  
10 Management Recorded in Electronic Clinical History: A Cohort Study. *Journal of*  
11  
12 *Clinical Medicine* 2020;**9**(8):23 doi:  
13  
14 <https://dx.doi.org/10.3390/jcm9082345>[published Online First: Epub Date]].  
15  
16  
17 28. Antognoli EL, Seeholzer EL, Gullett H, Jackson B, Smith S, Flocke SA. Primary Care  
18  
19 Resident Training for Obesity, Nutrition, and Physical Activity Counseling: A Mixed-  
20  
21 Methods Study. *Health Promotion Practice* 2017;**18**(5):672-80 doi:  
22  
23 10.1177/1524839916658025[published Online First: Epub Date]].  
24  
25  
26 29. AuYoung M, Duru OK, Ponce NA, Mangione CM, Rodriguez HP. Frontline Experiences  
27  
28 of a Practice Redesign to Improve Self-management of Obesity in Safety Net Clinics.  
29  
30 *Journal of Ambulatory Care Management* 2015;**38**(2):153-63 doi:  
31  
32 10.1097/JAC.000000000000063[published Online First: Epub Date]].  
33  
34  
35 30. Binhemd T, Larbi EB, Absood G. Obesity in a primary health care centre: A retrospective  
36  
37 study. *Annals of Saudi Medicine* 1991;**11**(2):163-6  
38  
39  
40 31. Bonney A, MacKinnon D, Barnett S, Mayne DJ, Dijkmans-Hadley B, Charlton K. A  
41  
42 mixed-methods feasibility study of routinely weighing patients in general practice to  
43  
44 aid weight management. *Australian Family Physician* 2017;**46**(12):928-33  
45  
46  
47 32. Brixner D, Said Q, Kirkness C, Oberg B, Ben-Joseph R, Oderda G. Assessment of  
48  
49 cardiometabolic risk factors in a national primary care electronic health record  
50  
51 database. *Value in Health* 2007;**10**(SUPPL. 1):S29-S36 doi:  
52  
53 <http://dx.doi.org/10.1111/j.1524-4733.2006.00152.x>[published Online First: Epub  
54  
55 Date]].  
56  
57  
58  
59  
60

- 1  
2  
3 33. Bryant J, Sze Lin Y, Sanson-Fisher R, Mazza D, Carey M, Walsh J, Bisquera A, Yoong  
4  
5 SL. Is identification of smoking, risky alcohol consumption and overweight and  
6  
7 obesity by General Practitioners improving? A comparison over time. *Family Practice*  
8  
9 2015;**32**(6):664-71 doi: 10.1093/fampra/cmz078[published Online First: Epub Date]].  
10  
11  
12 34. Castillejos MC, Martín-Pérez C, García-Ruiz A, Mayoral-Cleries F, Moreno-Küstner B.  
13  
14 Recording of cardiovascular risk factors by general practitioners in patients with  
15  
16 schizophrenia. *Annals of General Psychiatry* 2020;**19**(1):1-8 doi: 10.1186/s12991-  
17  
18 020-00284-5[published Online First: Epub Date]].  
19  
20  
21 35. Davis NJ, Emerenini A, Wylie-Rosett J. Obesity management: physician practice patterns  
22  
23 and patient preference. *Diabetes Educator* 2006;**32**(4):557-61  
24  
25  
26 36. Dutton GR, Herman KG, Tan F, Goble M, Dancer-Brown M, Van Vesseem N, Ard JD.  
27  
28 Patient and physician characteristics associated with the provision of weight loss  
29  
30 counseling in primary care. *Obesity Research & Clinical Practice* 2014;**8**(2):e123-30  
31  
32 doi: <https://dx.doi.org/10.1016/j.orcp.2012.12.004>[published Online First: Epub  
33  
34 Date]].  
35  
36  
37 37. Fitzpatrick SL, Dickins K, Avery E, Ventrelle J, Shultz A, Kishen E, Rothschild S. Effect  
38  
39 of an obesity best practice alert on physician documentation and referral practices.  
40  
41 *Translational Behavioral Medicine* 2017;**7**(4):881-90 doi:  
42  
43 <https://dx.doi.org/10.1007/s13142-017-0514-0>[published Online First: Epub Date]].  
44  
45  
46 38. Gibbs HD, Broom J, Brown J, Laws RA, Reckless JPD, Noble PA, Kumar S, McCombie  
47  
48 EL, Lean MEJ, Lyons FG, Frost GS, Quinn MF, Barth JH, Haynes SM, Finer N, Ross  
49  
50 HM, Hole DJ, Montazeri A. Current approaches to obesity management in UK  
51  
52 primary care: The counterweight programme. *Journal of Human Nutrition and*  
53  
54 *Dietetics* 2004;**17**(3):183-90 doi: [http://dx.doi.org/10.1111/j.1365-](http://dx.doi.org/10.1111/j.1365-277X.2004.00528.x)  
55  
56 [277X.2004.00528.x](http://dx.doi.org/10.1111/j.1365-277X.2004.00528.x)[published Online First: Epub Date]].  
57  
58  
59  
60

- 1  
2  
3  
4  
5  
6  
7  
8  
9  
10  
11  
12  
13  
14  
15  
16  
17  
18  
19  
20  
21  
22  
23  
24  
25  
26  
27  
28  
29  
30  
31  
32  
33  
34  
35  
36  
37  
38  
39  
40  
41  
42  
43  
44  
45  
46  
47  
48  
49  
50  
51  
52  
53  
54  
55  
56  
57  
58  
59  
60
39. Heywood A, Ring I, Sanson-Fisher R, Mudge P. Screening for cardiovascular disease and risk reduction counselling behaviors of general practitioners. *Preventive Medicine* 1994;**23**(3):292-301
40. Klein Woolthuis EP, de Grauw WJC, van Gerwen WHEM, van den Hoogen HJM, van de Lisdonk EH, Metsemakers JFM, van Weel C. Identifying people at risk for undiagnosed type 2 diabetes using the GP's electronic medical record. *Family Practice* 2007;**24**(3):230-36 doi: <http://dx.doi.org/10.1093/fampra/cmm018>[published Online First: Epub Date]].
41. Bordowitz R, Morland K, Reich D. The use of an electronic medical record to improve documentation and treatment of obesity. *Family Medicine* 2007;**39**(4):274-9
42. Logue E, Gilchrist V, Bourguet C, Bartos P. Recognition and management of obesity in a family practice setting. *Journal of the American Board of Family Practice* 1993;**6**(5):457-63
43. Thapa R, Friderici J, Kleppel R, Fitzgerald J, Rothberg MB. Do physicians underrecognize obesity? *Southern Medical Journal* 2014;**107**(6):356-60 doi: <https://dx.doi.org/10.14423/01.SMJ.0000450707.44388.0c>[published Online First: Epub Date]].
44. Lemay CA, Cashman S, Savageau J, Fletcher K, Kinney R, Long-Middleton E. Underdiagnosis of obesity at a community health center. *Journal of the American Board of Family Practice* 2003;**16**(1):14-21
45. Funk LM, Ying S, Voils CI, Kloke J, Hanrahan LP, Shan Y. Electronic Health Record Data Versus the National Health and Nutrition Examination Survey (NHANES): A Comparison of Overweight and Obesity Rates. *Medical Care* 2017;**55**(6):598-605 doi: 10.1097/MLR.0000000000000693[published Online First: Epub Date]].

- 1  
2  
3 46. Andreacchi AT, Griffith LE, Guindon GE, Mayhew A, Bassim C, Pigeyre M, Stranges S,  
4  
5 Anderson LN. Body mass index, waist circumference, waist-to-hip ratio, and body fat  
6  
7 in relation to health care use in the Canadian Longitudinal Study on Aging.  
8  
9 International Journal of Obesity 2021;**45(3)**:666-76  
10  
11  
12 47. Bhanji S, Khuwaja AK, Siddiqui F, Azam I, Kazmi K. Underestimation of weight and its  
13  
14 associated factors among overweight and obese adults in Pakistan: a cross sectional  
15  
16 study. BMC public health 2011;**11(1)**:363  
17  
18  
19 48. Ewe MB, Lydell M, Bergh H, Hildingh C, Baigi A, Mansson J. Characteristics of patients  
20  
21 seeking a health promotion and weight reduction program in primary care. Journal of  
22  
23 Multidisciplinary Healthcare 2019;**12**:235-42 doi:  
24  
25 <http://dx.doi.org/10.2147/JMDH.S195269>[published Online First: Epub Date]].  
26  
27  
28 49. Sebo P, Herrmann FR, Haller DM. Accuracy of anthropometric measurements by general  
29  
30 practitioners in overweight and obese patients. BMC Obesity 2017;**4(1)** (no  
31  
32 **pagination**)  
33  
34  
35 50. Spencer L, O'Shea MC, Ball L, Desbrow B, Leveritt M. Attendance, weight and waist  
36  
37 circumference outcomes of patients with type 2 diabetes receiving Medicare-  
38  
39 subsidised dietetic services. Australian Journal of Primary Health 2014;**20(3)**:291-97  
40  
41  
42 51. Vrdoljak D, Markovic BB, Kranjcevic K, Lalic DI, Vucak J, Katic M. How well do  
43  
44 anthropometric indices correlate with cardiovascular risk factors? A cross-sectional  
45  
46 study in Croati. Medical Science Monitor 2012;**18(2)**:PH6-PH11  
47  
48  
49 52. Forgione N, Deed G, Kilov G, Rigas G. Managing Obesity in Primary Care: Breaking  
50  
51 Down the Barriers. Advances in Therapy 2018;**35(2)**:191-98  
52  
53  
54 53. Ashman F, Sturgiss E, Haesler E. Exploring Self-Efficacy in Australian General  
55  
56 Practitioners Managing Patient Obesity: A Qualitative Survey Study. int  
57  
58  
59  
60

- 2016;**2016**:8212837 doi: <https://dx.doi.org/10.1155/2016/8212837>[published Online First: Epub Date]].
54. Baker AM, Smith KC, Coa KI, Helzlsouer KJ, Caulfield LE, Peairs KS, Shockney LD, Klassen AC. Clinical Care Providers' Perspectives on Body Size and Weight Management Among Long-Term Cancer Survivors. *Integrative Cancer Therapies* 2015;**14**(3):240-48 doi: 10.1177/1534735415572882[published Online First: Epub Date]].
55. Bornhoeft K. Perceptions, Attitudes, and Behaviors of Primary Care Providers Toward Obesity Management: A Qualitative Study. *Journal of Community Health Nursing* 2018;**35**(3):85-101 doi: 10.1080/07370016.2018.1475792[published Online First: Epub Date]].
56. Mazza D, McCarthy E, Carey M, Turner L, Harris M. "90% of the time, it's not just weight": General practitioner and practice staff perspectives regarding the barriers and enablers to obesity guideline implementation. *Obesity Research & Clinical Practice* 2019;**13**(4):398-403 doi: <https://dx.doi.org/10.1016/j.orcp.2019.04.001>[published Online First: Epub Date]].
57. Asselin JD, Osunlana A, Ogunleye A, Sharma AM, Campbell-Scherer D. Hidden in plain sight: The embedded nature of obesity in primary care visits. *Canadian Journal of Diabetes* 2015;**1**):S53
58. Gunther S, Guo F, Sinfield P, Rogers S, Baker R. Barriers and enablers to managing obesity in general practice: a practical approach for use in implementation activities. *Quality in Primary Care* 2012;**20**(2):93-103
59. Aboueid S, Bourgeault I, Giroux I. Nutrition care practices of primary care providers for weight management in multidisciplinary primary care settings in Ontario, Canada - a



- 1  
2  
3 qualitative study. BMC Family Practice 2018;**19**(1):69 doi:  
4  
5 <https://dx.doi.org/10.1186/s12875-018-0760-3>[published Online First: Epub Date]].  
6  
7  
8 60. Campbell K, Engel H, Timperio A, Cooper C, Crawford D. Obesity management:  
9  
10 Australian general practitioners' attitudes and practices. Obesity research  
11  
12 2000;**8**(6):459-66  
13  
14  
15 61. Doherty AJ, Jones SP, Chauhan U, Gibson JME. Healthcare practitioners' views and  
16  
17 experiences of barriers and facilitators to weight management interventions for adults  
18  
19 with intellectual disabilities. Journal of applied research in intellectual disabilities :  
20  
21 JARID 2019;**32**(5):1067-77  
22  
23  
24 62. Bocquier A, Verger P, Basdevant A, Andreotti G, Baretge J, Villani P, Paraponaris A.  
25  
26 Overweight and obesity: knowledge, attitudes, and practices of general practitioners  
27  
28 in france. Obesity research 2005;**13**(4):787-95  
29  
30  
31 63. Aleem S, Lasky R, Brooks WB, Batsis JA. Obesity perceptions and documentation  
32  
33 among primary care clinicians at a rural academic health center. Obesity Research and  
34  
35 Clinical Practice 2015;**9**(4):408-15 doi:  
36  
37 <http://dx.doi.org/10.1016/j.orcp.2015.08.014>[published Online First: Epub Date]].  
38  
39  
40 64. Baer HJ, Karson AS, Soukup JR, Williams DH, Bates DW. Documentation and diagnosis  
41  
42 of overweight and obesity in electronic health records of adult primary care patients.  
43  
44 JAMA Internal Medicine 2013;**173**(17):1648-52 doi:  
45  
46 10.1001/jamainternmed.2013.7815[published Online First: Epub Date]].  
47  
48  
49 65. Bleich SN, Pickett-Blakely O, Cooper LA, Bleich SN, Pickett-Blakely O, Cooper LA.  
50  
51 Physician practice patterns of obesity diagnosis and weight-related counseling. Patient  
52  
53 Education & Counseling 2011;**82**(1):123-29 doi:  
54  
55 10.1016/j.pec.2010.02.018[published Online First: Epub Date]].  
56  
57  
58  
59  
60

- 1  
2  
3 66. Booth HP, Prevost AT, Gulliford MC. Epidemiology of clinical body mass index  
4  
5 recording in an obese population in primary care: a cohort study. *Journal of Public*  
6  
7 *Health* 2013;**35**(1):67-74 doi: pubmed/fds063[published Online First: Epub Date]].  
8  
9
- 10 67. Bramlage P, Wittchen HU, Pittrow D, Kirch W, Krause P, Lehnert H, Unger T, Hofler M,  
11  
12 Kupper B, Dahm S, Bohler S, Sharma AM. Recognition and management of  
13  
14 overweight and obesity in primary care in Germany. *Int J Obes Relat Metab Disord*  
15  
16 2004;**28**(10):1299-308  
17  
18
- 19 68. Cuccu Z, Abi-Aad G, Duggal A. Characteristics of patients with body mass index  
20  
21 recorded within the Kent Integrated Dataset (KID). *BMJ health & care informatics*  
22  
23 2019;**26**(1) doi: <http://dx.doi.org/10.1136/bmjhci-2019-000026>[published Online  
24  
25 First: Epub Date]].  
26  
27
- 28 69. Cyr PR, Haskins AE, Holt C, Hanifi J. Weighty Problems: Predictors of Family  
29  
30 Physicians Documenting Overweight and Obesity. *Family Medicine* 2016;**48**(3):217-  
31  
32 21  
33  
34
- 35 70. Dalton A, Bottle A, Okoro C, Majeed A, Millett C. Implementation of the NHS Health  
36  
37 Checks programme: Baseline assessment of risk factor recording in an urban  
38  
39 culturally diverse setting. *Family practice* 2011;**28**:34-40 doi:  
40  
41 10.1093/fampra/cmq068[published Online First: Epub Date]].  
42  
43
- 44 71. Emanuel G, Charlton J, Ashworth M, Gulliford MC, Dregan A. Cardiovascular risk  
45  
46 assessment and treatment in chronic inflammatory disorders in primary care. *Heart*  
47  
48 2016;**102**(24):1957-62 doi: [https://dx.doi.org/10.1136/heartjnl-2016-](https://dx.doi.org/10.1136/heartjnl-2016-310111)  
49  
50 [310111](https://dx.doi.org/10.1136/heartjnl-2016-310111)[published Online First: Epub Date]].  
51  
52
- 53 72. Ghosh A. Depressed, anxious and breathless missing out: Weight screening in general  
54  
55 practice in a regional catchment of New South Wales. *Australian Journal of Rural*  
56  
57  
58  
59  
60

- 1  
2  
3 Health 2016;**24**(4):246-52 doi: 10.1111/ajr.12264[published Online First: Epub  
4  
5 Date]].  
6  
7
- 8 73. Gonzalez-Chica DA, Bowden J, Miller C, Longo M, Nelson M, Reid C, Stocks N.  
9  
10 Patient-reported GP health assessments rather than individual cardiovascular risk  
11  
12 burden are associated with the engagement in lifestyle changes: population-based  
13  
14 survey in South Australia. BMC Family Practice 2019;**20**(1):1-10 doi:  
15  
16 10.1186/s12875-019-1066-9[published Online First: Epub Date]].  
17  
18
- 19 74. Gutierrez Angulo ML, Amenabar Azurmendi MD, Cuesta Sole ML, Prieto Esteban I,  
20  
21 Mancebo Martinez S, Iglesias Alonso A. Prevalence of obesity recorded in Primary  
22  
23 Care. Endocrinologia y Nutricion 2014;**61**(9):469-73 doi:  
24  
25 <https://dx.doi.org/10.1016/j.endonu.2014.03.012>[published Online First: Epub Date]].  
26  
27
- 28 75. Mattar A, Carlston D, Sariol G, Yu T, Almustafa A, Melton GB, Ahmed A. The  
29  
30 prevalence of obesity documentation in Primary Care Electronic Medical Records.  
31  
32 Are we acknowledging the problem? Applied Clinical Informatics 2017;**8**(1):67-79  
33  
34 doi: <https://dx.doi.org/10.4338/ACI-2016-07-RA-0115>[published Online First: Epub  
35  
36 Date]].  
37  
38
- 39 76. Melamed OC, Nakar S, Vinker S. Suboptimal identification of obesity by family  
40  
41 physicians. American Journal of Managed Care 2009;**15**(9):619-24  
42  
43
- 44 77. Mocarski M, Tian Y, Smolarz BG, McAna J, Crawford A. Use of International  
45  
46 Classification of Diseases, Ninth Revision Codes for Obesity: Trends in the United  
47  
48 States from an Electronic Health Record-Derived Database. Population Health  
49  
50 Management 2018;**21**(3):222-30 doi:  
51  
52 <https://dx.doi.org/10.1089/pop.2017.0092>[published Online First: Epub Date]].  
53  
54
- 55 78. Nicholson BD, Aveyard P, Bankhead CR, Hamilton W, Hobbs FDR, Lay-Flurrie S.  
56  
57 Determinants and extent of weight recording in UK primary care: an analysis of 5  
58  
59  
60

- 1  
2  
3 million adults' electronic health records from 2000 to 2017. BMC Medicine  
4  
5 2019;**17**(1):222-22 doi: 10.1186/s12916-019-1446-y[published Online First: Epub  
6  
7 Date]].
- 8  
9  
10 79. Osborn DPJ, Baio G, Walters KR, Petersen I, Limburg H, Raine R, Nazareth I.  
11  
12 Inequalities in the provision of cardiovascular screening to people with severe mental  
13  
14 illnesses in primary care Cohort study in the United Kingdom THIN Primary Care  
15  
16 Database 2000 2007. Schizophrenia Research 2011;**129**:104-10  
17  
18
- 19 80. Rose SA, Turchin A, Grant RW, Meigs JB, Rose SA, Turchin A, Grant RW, Meigs JB.  
20  
21 Documentation of body mass index and control of associated risk factors in a large  
22  
23 primary care network. BMC Health Services Research 2009;**9**:236-36 doi:  
24  
25 10.1186/1472-6963-9-236[published Online First: Epub Date]].  
26  
27
- 28 81. Ruser CB, Sanders L, Brescia GR, Talbot M, Hartman K, Vivieros K, Bravata DM. Brief  
29  
30 Report: Identification and management of overweight and obesity by internal  
31  
32 medicine residents. Journal of General Internal Medicine 2005;**20**(12):1139-41 doi:  
33  
34 <http://dx.doi.org/10.1111/j.1525-1497.2005.0263.x>[published Online First: Epub  
35  
36 Date]].  
37  
38
- 39 82. Turner LR, Harris MF, Mazza D. Obesity management in general practice: does current  
40  
41 practice match guideline recommendations? Med J Aust 2015;**202**(7):370-2 doi:  
42  
43 10.5694/mja14.00998[published Online First: Epub Date]].  
44  
45
- 46 83. Verberne LDM, Nielen MMJ, Leemrijse CJ, Verheij RA, Friele RD. Recording of weight  
47  
48 in electronic health records: an observational study in general practice. BMC family  
49  
50 practice 2018;**19**(1):174 doi: <http://dx.doi.org/10.1186/s12875-018-0863-x>[published  
51  
52 Online First: Epub Date]].  
53  
54
- 55 84. Yoong SL, Carey ML, Sanson-Fisher RW, D'Este CA, Mackenzie L, Boyes A. A cross-  
56  
57 sectional study examining Australian general practitioners' identification of  
58  
59  
60

- 1  
2  
3 overweight and obese patients. JGIM: Journal of General Internal Medicine  
4  
5 2014;**29**(2):328-34 doi: 10.1007/s11606-013-2637-4[published Online First: Epub  
6  
7 Date]].  
8  
9
- 10 85. Dunkley AJ, Stone MA, Patel N, Davies MJ, Khunti K. Waist circumference  
11  
12 measurement: knowledge, attitudes and barriers in patients and practitioners in a  
13  
14 multi-ethnic population. Family Practice 2009;**26**(5):365-71 doi:  
15  
16 <https://dx.doi.org/10.1093/fampra/cmp048>[published Online First: Epub Date]].  
17  
18
- 19 86. Gaynor B, Habermann B, Wright R. Waist Circumference Measurement Diffusion in  
20  
21 Primary Care. The Journal for Nurse Practitioners 2018;**14**(9):683-88.e1 doi:  
22  
23 10.1016/j.nurpra.2018.06.002[published Online First: Epub Date]].  
24  
25
- 26 87. McHale CT, Laidlaw AH, Cecil JE. Primary care patient and practitioner views of weight  
27  
28 and weight-related discussion: a mixed-methods study. BMJ Open 2020;**10**(3):(no  
29  
30 pagination) doi: <https://dx.doi.org/10.1136/bmjopen-2019-034023>[published Online  
31  
32 First: Epub Date]].  
33  
34
- 35 88. Borenstein M, Hedges L, Higgins J, Rothstein H. *Introduction to Meta-Analysis*, 2021.  
36  
37  
38  
39  
40  
41  
42  
43  
44  
45  
46  
47  
48  
49  
50  
51  
52  
53  
54  
55  
56  
57  
58  
59  
60



## PRISMA 2020 Checklist

| Section and Topic             | Item # | Checklist item                                                                                                                                                                                                                                                                                       | Location where item is reported |
|-------------------------------|--------|------------------------------------------------------------------------------------------------------------------------------------------------------------------------------------------------------------------------------------------------------------------------------------------------------|---------------------------------|
| <b>TITLE</b>                  |        |                                                                                                                                                                                                                                                                                                      |                                 |
| Title                         | 1      | Identify the report as a systematic review.                                                                                                                                                                                                                                                          | 1                               |
| <b>ABSTRACT</b>               |        |                                                                                                                                                                                                                                                                                                      |                                 |
| Abstract                      | 2      | See the PRISMA 2020 for Abstracts checklist.                                                                                                                                                                                                                                                         | 2                               |
| <b>INTRODUCTION</b>           |        |                                                                                                                                                                                                                                                                                                      |                                 |
| Rationale                     | 3      | Describe the rationale for the review in the context of existing knowledge.                                                                                                                                                                                                                          | 4                               |
| Objectives                    | 4      | Provide an explicit statement of the objective(s) or question(s) the review addresses.                                                                                                                                                                                                               | 4                               |
| <b>METHODS</b>                |        |                                                                                                                                                                                                                                                                                                      |                                 |
| Eligibility criteria          | 5      | Specify the inclusion and exclusion criteria for the review and how studies were grouped for the syntheses.                                                                                                                                                                                          | 4,5                             |
| Information sources           | 6      | Specify all databases, registers, websites, organisations, reference lists and other sources searched or consulted to identify studies. Specify the date when each source was last searched or consulted.                                                                                            | 6                               |
| Search strategy               | 7      | Present the full search strategies for all databases, registers and websites, including any filters and limits used.                                                                                                                                                                                 | Supplementary Table S1          |
| Selection process             | 8      | Specify the methods used to decide whether a study met the inclusion criteria of the review, including how many reviewers screened each record and each report retrieved, whether they worked independently, and if applicable, details of automation tools used in the process.                     | 6                               |
| Data collection process       | 9      | Specify the methods used to collect data from reports, including how many reviewers collected data from each report, whether they worked independently, any processes for obtaining or confirming data from study investigators, and if applicable, details of automation tools used in the process. | 6                               |
| Data items                    | 10a    | List and define all outcomes for which data were sought. Specify whether all results that were compatible with each outcome domain in each study were sought (e.g. for all measures, time points, analyses), and if not, the methods used to decide which results to collect.                        | 5,6                             |
|                               | 10b    | List and define all other variables for which data were sought (e.g. participant and intervention characteristics, funding sources). Describe any assumptions made about any missing or unclear information.                                                                                         | 5,6                             |
| Study risk of bias assessment | 11     | Specify the methods used to assess risk of bias in the included studies, including details of the tool(s) used, how many reviewers assessed each study and whether they worked independently, and if applicable, details of automation tools used in the process.                                    | 6                               |
| Effect measures               | 12     | Specify for each outcome the effect measure(s) (e.g. risk ratio, mean difference) used in the synthesis or presentation of results.                                                                                                                                                                  | 7                               |
| Synthesis methods             | 13a    | Describe the processes used to decide which studies were eligible for each synthesis (e.g. tabulating the study intervention characteristics and comparing against the planned groups for each synthesis (item #5)).                                                                                 | 7,8                             |
|                               | 13b    | Describe any methods required to prepare the data for presentation or synthesis, such as handling of missing summary statistics, or data conversions.                                                                                                                                                | 7,8                             |
|                               | 13c    | Describe any methods used to tabulate or visually display results of individual studies and syntheses.                                                                                                                                                                                               | 7,8                             |
|                               | 13d    | Describe any methods used to synthesize results and provide a rationale for the choice(s). If meta-analysis was performed, describe the model(s), method(s) to identify the presence and extent of statistical heterogeneity, and software package(s) used.                                          | 7,8                             |
|                               | 13e    | Describe any methods used to explore possible causes of heterogeneity among study results (e.g. subgroup analysis, meta-regression).                                                                                                                                                                 | 7,8                             |
|                               | 13f    | Describe any sensitivity analyses conducted to assess robustness of the synthesized results.                                                                                                                                                                                                         | 7,8                             |
| Reporting bias assessment     | 14     | Describe any methods used to assess risk of bias due to missing results in a synthesis (arising from reporting biases).                                                                                                                                                                              | 8                               |

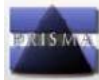

## PRISMA 2020 Checklist

| Section and Topic             | Item # | Checklist item                                                                                                                                                                                                                                                                       | Location where item is reported |
|-------------------------------|--------|--------------------------------------------------------------------------------------------------------------------------------------------------------------------------------------------------------------------------------------------------------------------------------------|---------------------------------|
| Certainty assessment          | 15     | Describe any methods used to assess certainty (or confidence) in the body of evidence for an outcome.                                                                                                                                                                                | 7,8                             |
| <b>RESULTS</b>                |        |                                                                                                                                                                                                                                                                                      |                                 |
| Study selection               | 16a    | Describe the results of the search and selection process, from the number of records identified in the search to the number of studies included in the review, ideally using a flow diagram.                                                                                         | 9                               |
|                               | 16b    | Cite studies that might appear to meet the inclusion criteria, but which were excluded, and explain why they were excluded.                                                                                                                                                          | Supplementary Table S2          |
| Study characteristics         | 17     | Cite each included study and present its characteristics.                                                                                                                                                                                                                            | Supplementary Tables S3 and S4) |
| Risk of bias in studies       | 18     | Present assessments of risk of bias for each included study.                                                                                                                                                                                                                         | Supplementary Table S           |
| Results of individual studies | 19     | For all outcomes, present, for each study: (a) summary statistics for each group (where appropriate) and (b) an effect estimate and its precision (e.g. confidence/credible interval), ideally using structured tables or plots.                                                     | 10-13<br>Supplementary          |
| Results of syntheses          | 20a    | For each synthesis, briefly summarise the characteristics and risk of bias among contributing studies.                                                                                                                                                                               | 10-13,<br>Supplementary         |
|                               | 20b    | Present results of all statistical syntheses conducted. If meta-analysis was done, present for each the summary estimate and its precision (e.g. confidence/credible interval) and measures of statistical heterogeneity. If comparing groups, describe the direction of the effect. | 10-13<br>Supplementary          |
|                               | 20c    | Present results of all investigations of possible causes of heterogeneity among study results.                                                                                                                                                                                       | 10-13<br>Supplementary          |
|                               | 20d    | Present results of all sensitivity analyses conducted to assess the robustness of the synthesized results.                                                                                                                                                                           | 10-13<br>Supplementary          |
| Reporting biases              | 21     | Present assessments of risk of bias due to missing results (arising from reporting biases) for each synthesis assessed.                                                                                                                                                              | 10-13<br>Supplementary          |
| Certainty of evidence         | 22     | Present assessments of certainty (or confidence) in the body of evidence for each outcome assessed.                                                                                                                                                                                  | 10-13<br>Supplementary          |
| <b>DISCUSSION</b>             |        |                                                                                                                                                                                                                                                                                      |                                 |
| Discussion                    | 23a    | Provide a general interpretation of the results in the context of other evidence.                                                                                                                                                                                                    | 16-17                           |
|                               | 23b    | Discuss any limitations of the evidence included in the review.                                                                                                                                                                                                                      | 18                              |
|                               | 23c    | Discuss any limitations of the review processes used.                                                                                                                                                                                                                                | 18                              |
|                               | 23d    | Discuss implications of the results for practice, policy, and future research.                                                                                                                                                                                                       | 16, 18, 19                      |
| <b>OTHER INFORMATION</b>      |        |                                                                                                                                                                                                                                                                                      |                                 |
| Registration and              | 24a    | Provide registration information for the review, including register name and registration number, or state that the review was not registered.                                                                                                                                       | 20                              |

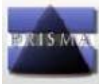

## PRISMA 2020 Checklist

| Section and Topic                              | Item # | Checklist item                                                                                                                                                                                                                             | Location where item is reported |
|------------------------------------------------|--------|--------------------------------------------------------------------------------------------------------------------------------------------------------------------------------------------------------------------------------------------|---------------------------------|
| protocol                                       | 24b    | Indicate where the review protocol can be accessed, or state that a protocol was not prepared.                                                                                                                                             | 20                              |
|                                                | 24c    | Describe and explain any amendments to information provided at registration or in the protocol.                                                                                                                                            | Not applicable                  |
| Support                                        | 25     | Describe sources of financial or non-financial support for the review, and the role of the funders or sponsors in the review.                                                                                                              | 19                              |
| Competing interests                            | 26     | Declare any competing interests of review authors.                                                                                                                                                                                         | 19                              |
| Availability of data, code and other materials | 27     | Report which of the following are publicly available and where they can be found: template data collection forms; data extracted from included studies; data used for all analyses; analytic code; any other materials used in the review. | 20                              |

From: Page MJ, McKenzie JE, Bossuyt PM, Boutron I, Hoffmann TC, Mulrow CD, et al. The PRISMA 2020 statement: an updated guideline for reporting systematic reviews. *BMJ* 2021;372:n71. doi: 10.1136/bmj.n71

For more information, visit: <http://www.prisma-statement.org/>
