# Supplementary material for: Enablers and barriers to implementing obesity assessments in clinical practice: a rapid mixed-methods systematic review
Source: PubMed Central journal article supplement — BMJ Open. 2022 Nov 29;12(11):e063659. doi: 10.1136/bmjopen-2022-063659 (PMC9710371; doi:10.1136/bmjopen-2022-063659), 2022-11-29
Supplement: bmjopen-2022-063659supp001.pdf [file bmjopen-2022-063659supp001.pdf]

**Supplementary File****Table of contents**

|                                                                                            |    |
|--------------------------------------------------------------------------------------------|----|
| Supplementary Table S1: Search strategy .....                                              | 2  |
| Ovid MEDLINE(R) ALL <1946 to present> .....                                                | 2  |
| Embase via OvidSP (1947 - present).....                                                    | 5  |
| CINAHL via EBSCO.....                                                                      | 8  |
| Web searching.....                                                                         | 10 |
| Supplementary Table S2: List of excluded studies with reasons .....                        | 12 |
| Supplementary Table S3: Characteristics and summary of quantitative studies reviewed ..... | 13 |
| Supplementary Table S4: Characteristics and summary of qualitative studies reviewed .....  | 29 |
| Supplementary Table S5: Risk of bias assessment of studies reviewed .....                  | 33 |
| Supplementary Section S6: Summary of results from all meta-analyses .....                  | 36 |
| S6.1 Sex as a predictor of BMI assessment.....                                             | 36 |
| S6.2 Age as a predictor of BMI assessment .....                                            | 37 |
| S6.3 Race/ethnicity as a predictor of BMI assessment.....                                  | 39 |
| S6.4 Deprivation as a predictor of BMI assessment.....                                     | 42 |
| S6.5 Health insurance status as a predictor of BMI assessment.....                         | 43 |
| S6.6 BMI category as a predictor of BMI assessment .....                                   | 44 |
| S6.7 Smoking status as a predictor of BMI assessment .....                                 | 46 |
| S6.8 The number of comorbidities as a predictor of BMI assessment.....                     | 46 |
| S6.9 Cardiovascular disease as a predictor of BMI assessment.....                          | 48 |
| S6.10 Diabetes as a predictor of BMI assessment.....                                       | 50 |
| S6.11 Dyslipidaemia disease as a predictor of BMI assessment.....                          | 51 |
| S6.12 Hypertension as a predictor of BMI assessment .....                                  | 52 |
| S6.13 Mental illness as a predictor of BMI assessment .....                                | 53 |
| S6.14 Depression as a predictor of BMI assessment.....                                     | 54 |
| Supplementary Section S7: References.....                                                  | 55 |

**Supplementary Table S1: Search strategy**

Ovid MEDLINE(R) ALL &lt;1946 to present&gt;

| #  | Query                                                                                                                                                             | Results from 25 <sup>th</sup> Sept. 2021 |
|----|-------------------------------------------------------------------------------------------------------------------------------------------------------------------|------------------------------------------|
| 1  | Primary Health Care/                                                                                                                                              | 85,205                                   |
| 2  | general practice/ or family practice/                                                                                                                             | 76,814                                   |
| 3  | (primary adj2 (care or health*)).tw.                                                                                                                              | 157,253                                  |
| 4  | ((general or family) adj (practice* or practitioner*)).tw.                                                                                                        | 93,468                                   |
| 5  | ((family or community or practice*) adj (medic* or doctor* or physician* or nurs*)).tw.                                                                           | 47,774                                   |
| 6  | 1 or 2 or 3 or 4 or 5                                                                                                                                             | 312,040                                  |
| 7  | obesity/ or obesity, abdominal/ or obesity, maternal/ or obesity, metabolically benign/ or obesity, morbid/                                                       | 221,007                                  |
| 8  | Overweight/                                                                                                                                                       | 28,308                                   |
| 9  | Overnutrition/                                                                                                                                                    | 623                                      |
| 10 | overnutrition.tw.                                                                                                                                                 | 1,652                                    |
| 11 | hypernutrition.tw.                                                                                                                                                | 44                                       |
| 12 | obes*.tw.                                                                                                                                                         | 330,756                                  |
| 13 | overweight.tw.                                                                                                                                                    | 76,708                                   |
| 14 | 7 or 8 or 9 or 10 or 11 or 12 or 13                                                                                                                               | 398,378                                  |
| 15 | Risk Assessment/                                                                                                                                                  | 290,450                                  |
| 16 | risk analys*.tw.                                                                                                                                                  | 6,900                                    |
| 17 | nutrition assessment/                                                                                                                                             | 16,427                                   |
| 18 | Nutrition* assessment*.tw.                                                                                                                                        | 5,943                                    |
| 19 | Anthropometry/                                                                                                                                                    | 40,283                                   |
| 20 | anthropometr*.tw.                                                                                                                                                 | 59,988                                   |
| 21 | "body weights and measures"/ or body fat distribution/ or body mass index/ or body size/ or body height/ or body weight/ or sagittal abdominal diameter/ or waist | 365,578                                  |

|    |                                                                                                           |           |
|----|-----------------------------------------------------------------------------------------------------------|-----------|
|    | circumference/ or waist-height ratio/ or body surface area/<br>or skinfold thickness/ or waist-hip ratio/ |           |
| 22 | body mass index/                                                                                          | 138,215   |
| 23 | quetelet index.tw.                                                                                        | 491       |
| 24 | Body mass index*.tw.                                                                                      | 205,275   |
| 25 | BMI.tw.                                                                                                   | 163,110   |
| 26 | waist hip ratio*.tw.                                                                                      | 4,227     |
| 27 | skinfold thickness.tw.                                                                                    | 3,820     |
| 28 | ((waist or abdominal) adj2 (circumference* or diameter*<br>or measur*).tw.                                | 36,332    |
| 29 | waist height ratio*.tw.                                                                                   | 475       |
| 30 | (obesity adj2 (manag* or guideline* or measur*).tw.                                                       | 6,750     |
| 31 | (weight adj2 (assess* or Measur* or manag* or<br>record*).tw.                                             | 26,808    |
| 32 | 15 or 16 or 17 or 18 or 19 or 20 or 21 or 22 or 23 or 24 or<br>25 or 26 or 27 or 28 or 29 or 30 or 31     | 897,461   |
| 33 | 6 and 14 and 32                                                                                           | 3,947     |
| 34 | observational study/                                                                                      | 112,847   |
| 35 | exp Cohort Studies/                                                                                       | 2,238,711 |
| 36 | Cross-Sectional Studies/                                                                                  | 395,811   |
| 37 | exp case-control studies/                                                                                 | 1,243,913 |
| 38 | case reports/                                                                                             | 2,221,553 |
| 39 | observational stud*.tw.                                                                                   | 129,947   |
| 40 | cohort stud*.tw.                                                                                          | 252,108   |
| 41 | cross-sectional stud*.tw.                                                                                 | 202,987   |
| 42 | case control stud*.tw.                                                                                    | 114,641   |
| 43 | case series.tw.                                                                                           | 87,502    |
| 44 | case stud*.tw.                                                                                            | 108,683   |

|    |                                                                                                                                                                            |           |
|----|----------------------------------------------------------------------------------------------------------------------------------------------------------------------------|-----------|
| 45 | case histor*.tw.                                                                                                                                                           | 12,948    |
| 46 | case report*.tw.                                                                                                                                                           | 407,817   |
| 47 | case comparison*.tw.                                                                                                                                                       | 708       |
| 48 | case base.tw.                                                                                                                                                              | 122       |
| 49 | prevalence stud*.tw.                                                                                                                                                       | 5,709     |
| 50 | longitudinal stud*.tw.                                                                                                                                                     | 84,271    |
| 51 | follow up stud*.tw.                                                                                                                                                        | 52,359    |
| 52 | prospective stud*.tw.                                                                                                                                                      | 188,483   |
| 53 | retrospective stud*.tw.                                                                                                                                                    | 183,893   |
| 54 | Electronic Health Records/                                                                                                                                                 | 23,614    |
| 55 | health record*.tw.                                                                                                                                                         | 24,610    |
| 56 | medical record*.tw.                                                                                                                                                        | 122,413   |
| 57 | patient record*.tw.                                                                                                                                                        | 13,682    |
| 58 | qualitative research/                                                                                                                                                      | 69,103    |
| 59 | qualitative.tw.                                                                                                                                                            | 262,287   |
| 60 | interview/                                                                                                                                                                 | 29,952    |
| 61 | interview*.tw.                                                                                                                                                             | 396,852   |
| 62 | experienc*.tw.                                                                                                                                                             | 1,239,418 |
| 63 | 34 or 35 or 36 or 37 or 38 or 39 or 40 or 41 or 42 or 43 or 44 or 45 or 46 or 47 or 48 or 49 or 50 or 51 or 52 or 53 or 54 or 55 or 56 or 57 or 58 or 59 or 60 or 61 or 62 | 6,715,787 |
| 64 | 33 and 63                                                                                                                                                                  | 2,347     |
| 65 | exp child/ or child, preschool/ or exp infant/                                                                                                                             | 2,613,117 |
| 66 | child*.tw.                                                                                                                                                                 | 1,486,218 |
| 67 | 65 or 66                                                                                                                                                                   | 3,025,083 |
| 68 | 64 not 67                                                                                                                                                                  | 1,769     |
| 69 | limit 68 to English language                                                                                                                                               | 1,661     |

Embase via OvidSP (1947 - present)

Search repeated on 25/11/21

| #  | Query                                                                                                                                                                                                                              | Results from 25th Nov 2021 |
|----|------------------------------------------------------------------------------------------------------------------------------------------------------------------------------------------------------------------------------------|----------------------------|
| 1  | primary health care/                                                                                                                                                                                                               | 71,908                     |
| 2  | general practice/                                                                                                                                                                                                                  | 82,366                     |
| 3  | (primary adj2 (care or health*)).tw.                                                                                                                                                                                               | 211,681                    |
| 4  | ((general or family) adj (practice* or practitioner*)).tw.                                                                                                                                                                         | 119,145                    |
| 5  | ((family or community or practice*) adj (medic* or doctor* or physician* or nurs*)).tw.                                                                                                                                            | 61,008                     |
| 6  | 1 or 2 or 3 or 4 or 5                                                                                                                                                                                                              | 402,212                    |
| 7  | obesity/ or overnutrition/ or abdominal obesity/ or diabetic obesity/ or maternal obesity/ or metabolic syndrome x/ or metabolically benign obesity/ or morbid obesity/ or obesity associated inflammation/ or sarcopenic obesity/ | 564,931                    |
| 8  | overweight.tw.                                                                                                                                                                                                                     | 116,959                    |
| 9  | overnutrition.tw.                                                                                                                                                                                                                  | 2,129                      |
| 10 | hypernutrition.tw.                                                                                                                                                                                                                 | 87                         |
| 11 | obes*.tw.                                                                                                                                                                                                                          | 497,753                    |
| 12 | 7 or 8 or 9 or 10 or 11                                                                                                                                                                                                            | 691,801                    |
| 13 | risk assessment/                                                                                                                                                                                                                   | 642,360                    |
| 14 | risk analys*.tw.                                                                                                                                                                                                                   | 10,891                     |
| 15 | nutritional assessment/                                                                                                                                                                                                            | 32,946                     |
| 16 | nutrition* assessment*.tw.                                                                                                                                                                                                         | 9,486                      |
| 17 | anthropometry/                                                                                                                                                                                                                     | 60,255                     |
| 18 | anthropometr*.tw.                                                                                                                                                                                                                  | 88,470                     |
| 19 | body weight/ or body weight change/ or body weight control/                                                                                                                                                                        | 350,919                    |
| 20 | body fat distribution/ or body fat percentage/                                                                                                                                                                                     | 8,611                      |
| 21 | body mass/                                                                                                                                                                                                                         | 514,870                    |

|    |                                                                                                                                                                                                                                                                                                                                                                               |           |
|----|-------------------------------------------------------------------------------------------------------------------------------------------------------------------------------------------------------------------------------------------------------------------------------------------------------------------------------------------------------------------------------|-----------|
| 22 | anthropometric parameters/ or abdominal circumference/ or adipose tissue thickness/ or body adiposity index/ or body fat percentage/ or body height/ or body mass/ or body size/ or body weight/ or sagittal abdominal diameter/ or total body fat/ or total body surface area/ or waist circumference/ or waist hip ratio/ or waist to height ratio/ or weight height ratio/ | 879,707   |
| 23 | skinfold thickness/                                                                                                                                                                                                                                                                                                                                                           | 14,631    |
| 24 | quetelet index.tw.                                                                                                                                                                                                                                                                                                                                                            | 568       |
| 25 | body mass index*.tw.                                                                                                                                                                                                                                                                                                                                                          | 301,374   |
| 26 | BMI.tw.                                                                                                                                                                                                                                                                                                                                                                       | 348,314   |
| 27 | waist hip ratio*.tw.                                                                                                                                                                                                                                                                                                                                                          | 6,517     |
| 28 | skinfold thickness*.tw.                                                                                                                                                                                                                                                                                                                                                       | 5,749     |
| 29 | ((waist or abdominal) adj2 (circumference* or diameter* or measur*)).tw.                                                                                                                                                                                                                                                                                                      | 58,312    |
| 30 | waist height ratio*.tw.                                                                                                                                                                                                                                                                                                                                                       | 750       |
| 31 | (obesity adj2 (manag* or guideline* or measur*)).tw.                                                                                                                                                                                                                                                                                                                          | 9,735     |
| 32 | (weight adj2 (assess* or measur* or manag* or record*)).tw.                                                                                                                                                                                                                                                                                                                   | 40,197    |
| 33 | 13 or 14 or 15 or 16 or 17 or 18 or 19 or 20 or 21 or 22 or 23 or 24 or 25 or 26 or 27 or 28 or 29 or 30 or 31 or 32                                                                                                                                                                                                                                                          | 1,702,045 |
| 34 | 6 and 12 and 33                                                                                                                                                                                                                                                                                                                                                               | 7,229     |
| 35 | observational study/ or observational stud*.tw.                                                                                                                                                                                                                                                                                                                               | 312,495   |
| 36 | cohort analysis/ or cohort stud*.tw.                                                                                                                                                                                                                                                                                                                                          | 855,948   |
| 37 | cross-sectional study/ or cross-sectional stud*.tw.                                                                                                                                                                                                                                                                                                                           | 493,778   |
| 38 | case control study/ or population based case control study/ or case control stud*.tw.                                                                                                                                                                                                                                                                                         | 238,398   |
| 39 | case report/ or (case report* or case histor* or case base or case comparison* or case series).tw.                                                                                                                                                                                                                                                                            | 2,909,888 |
| 40 | longitudinal study/ or longitudinal stud*.tw. or follow up stud*.tw.                                                                                                                                                                                                                                                                                                          | 267,646   |
| 41 | prospective study/ or prospective stud*.tw.                                                                                                                                                                                                                                                                                                                                   | 824,409   |

|    |                                                                                          |           |
|----|------------------------------------------------------------------------------------------|-----------|
| 42 | retrospective study/ or retrospective stud*.tw.                                          | 1,215,975 |
| 43 | electronic health record/ or (health record* or medical record* or patient* record*).tw. | 283,785   |
| 44 | quantitative.tw                                                                          | 867,485   |
| 45 | qualitative research/                                                                    | 94,353    |
| 46 | qualitative.tw.                                                                          | 334,859   |
| 47 | interview/                                                                               | 227,656   |
| 48 | interview*.tw.                                                                           | 508,149   |
| 49 | experienc*.tw.                                                                           | 1,787,221 |
| 50 | 35 or 36 or 37 or 38 or 39 or 40 or 41 or 42 or 43 or 44 or 45 or 46 or 47 or 48 or 49   | 8,044,506 |
| 51 | 34 and 50                                                                                | 3,787     |
| 52 | exp child/                                                                               | 2,994,174 |
| 53 | child*.tw.                                                                               | 1,998,334 |
| 54 | 52 or 53                                                                                 | 3,517,058 |
| 55 | 51 not 54                                                                                | 3,008     |
| 56 | limit 55 to english language                                                             | 2,904     |

## CINAHL via EBSCO

|     |                                                                                                                                                                                                                     |           |
|-----|---------------------------------------------------------------------------------------------------------------------------------------------------------------------------------------------------------------------|-----------|
| S1  | (MH "Primary Health Care")                                                                                                                                                                                          | (68,452)  |
| S2  | (MH "Family Practice")                                                                                                                                                                                              | (26,060)  |
| S3  | TI ( primary N2 (care OR health*) ) OR AB ( primary N2 (care OR health*) )                                                                                                                                          | (98,478)  |
| S4  | TI "general practice*" OR AB "general practice*"                                                                                                                                                                    | (17,218)  |
| S5  | TI "family practice*" OR AB "family practice*"                                                                                                                                                                      | (2,583)   |
| S6  | TI "family practitioner*" OR AB "family practitioner*"                                                                                                                                                              | (532)     |
| S7  | TI "general practitioner*" OR AB "general practitioner*"                                                                                                                                                            | (20,299)  |
| S8  | TI ( ((family OR community OR practice*) N2 (Doctor* OR physician* OR NURS*)) ) OR AB ( ((family OR community OR practice*) N2 (Doctor* OR physician* OR NURS*)) )                                                  | (89,399)  |
| S9  | S1 OR S2 OR S3 OR S4 OR S5 OR S6 OR S7 OR S8                                                                                                                                                                        | (236,098) |
| S10 | (MH "Overnutrition") OR (MM "Obesity, Maternal") OR (MM "Obesity, Morbid") OR (MH "Obesity+")                                                                                                                       | (107,322) |
| S11 | TI overweight OR obes* OR overnutrition OR hypernutrition                                                                                                                                                           | (59,247)  |
| S12 | AB overweight OR obes* OR overnutrition OR hypernutrition                                                                                                                                                           | (96,744)  |
| S13 | S10 OR S11 OR S12                                                                                                                                                                                                   | (152,475) |
| S14 | (MH "Risk Assessment")                                                                                                                                                                                              | (121,279) |
| S15 | TI risk analysis OR AB risk analysis                                                                                                                                                                                | (27,946)  |
| S16 | (MH "Nutritional Assessment")                                                                                                                                                                                       | (16,752)  |
| S17 | TI nutrition* assessment* OR AB nutrition* assessment*                                                                                                                                                              | (5,092)   |
| S18 | (MH "Body Mass Index") OR (MH "Body Size") OR (MH "Body Surface Area") OR (MH "Body Weight+") OR (MH "Waist Circumference") OR (MH "Waist-Hip Ratio") OR (MH "Body Weights and Measures+") OR (MH "Anthropometry+") | (254,870) |



|     |                                                                                                                                                                                                                                                          |           |
|-----|----------------------------------------------------------------------------------------------------------------------------------------------------------------------------------------------------------------------------------------------------------|-----------|
| S19 | TI ( "body Mass index" OR BMI OR "quetelet index" OR "waist hip ratio*" OR "skinfold thickness" OR "waist height ratio*" ) OR AB ( "body Mass index" OR BMI OR "quetelet index" OR "waist hip ratio*" OR "skinfold thickness" OR "waist height ratio*" ) | (99,434)  |
| S20 | TI ( ((waist OR abdominal) N2 (circumference* OR diameter* OR measur*)) ) OR AB ( ((waist OR abdominal) N2 (circumference* OR diameter* OR measur*)) )                                                                                                   | (14,244)  |
| S21 | TI ( obesity N2 (manag* OR guideline* OR measur*) ) OR AB ( obesity N2 (manag* OR guideline* OR measur*) )                                                                                                                                               | (3,649)   |
| S22 | TI ( weight N2 (manag* OR assess* OR measur* OR record*) ) OR AB ( weight N2 (manag* OR assess* OR measur* OR record*) )                                                                                                                                 | (14,646)  |
| S23 | S14 OR S15 OR S16 OR S17 OR S18 OR S19 OR S20 OR S21 OR S22                                                                                                                                                                                              | (443,890) |
| S24 | S9 AND S13 AND S23                                                                                                                                                                                                                                       | (3,941)   |
| S25 | (MH "Prospective Studies+") OR (MH "Cross Sectional Studies") OR (MH "Case Control Studies+")                                                                                                                                                            | (742,114) |
| S26 | TI ( "cohort stud*" OR "case control stud*" OR "observational stud*" OR "cross sectional stud*" ) OR AB ( "cohort stud*" OR "case control stud*" OR "observational stud*" OR "cross sectional stud*" )                                                   | (267,124) |
| S27 | (MH "Case Studies")                                                                                                                                                                                                                                      | (25,211)  |
| S28 | TI ( "case report*" OR "case stud*" OR "case series" OR "case histor*" OR "case base" OR "case comparison*" ) OR AB ( "case report*" OR "case stud*" OR "case series" OR "case histor*" OR "case base" OR "case comparison*" )                           | (173,690) |
| S29 | TI ( "prevalence stud*" OR "longitudinal stud*" OR "Follow up stud*" OR "prospective stud*" OR "retrospective stud*" ) OR AB ( "prevalence stud*" OR "longitudinal stud*" OR "Follow up stud*" OR "prospective stud*" OR "retrospective stud*" )         | (142,287) |
| S30 | (MH "Electronic Health Records+")                                                                                                                                                                                                                        | (27,388)  |

|     |                                                                                                                                          |             |
|-----|------------------------------------------------------------------------------------------------------------------------------------------|-------------|
| S31 | TI ( "medical record*" OR "patient* record*" OR "health record*" ) OR AB ( "medical record*" OR "patient* record*" OR "health record*" ) | (64,123)    |
| S32 | (MH "Qualitative Studies+")                                                                                                              | (161,978)   |
| S33 | TI qualitative OR AB qualitative                                                                                                         | (143,640)   |
| S34 | (MH "Interviews+")                                                                                                                       | (234,331)   |
| S35 | TI interview* OR AB interview*                                                                                                           | (237,270)   |
| S36 | TI experienc* AND AB experienc*                                                                                                          | (54,416)    |
| S37 | S25 OR S26 OR S27 OR S28 OR S29 OR S30 OR S31 OR S32 OR S33 OR S34 OR S35 OR S36                                                         | (1,477,201) |
| S38 | S24 AND S37                                                                                                                              | (1,538)     |
| S39 | (MH "Child+")                                                                                                                            | (713,632)   |
| S40 | TI child* OR AB child*                                                                                                                   | (535,788)   |
| S41 | S39 OR S40                                                                                                                               | (901,349)   |
| S42 | (S38) NOT (S41)                                                                                                                          | (1,082)     |

### Web searching

**NOTES:** Four papers (not retrieved in any of the database searches) were identified by via internet searching.

1. McLaughlin, Hamilton, K., & Kipping, R. (2017). Epidemiology of adult overweight recording and management by UK GPs: a systematic review. *British Journal of General Practice*, 67(663), e676–e683. <https://doi.org/10.3399/bjgp17X692309>

This paper was not retrieved in the searches because it **did not contain any terms from the qual/quant concept group.**

2. Dalton, Bottle, A., Okoro, C., Majeed, A., & Millett, C. (2011). Implementation of the NHS Health Checks programme: baseline assessment of risk factor recording in an urban culturally diverse setting. *Family Practice*, 28(1), 34–40. <https://doi.org/10.1093/fampra/cmq068>

This paper was not retrieved because it **does not contain any terms from the obesity/overweight concept group.**

3. Turner, Harris, M. F., & Mazza, D. (2015). Obesity management in general practice: does current practice match guideline recommendations? *Medical Journal of Australia*, 202(7), 370–372. <https://doi.org/10.5694/mja14.00998>

This paper was not retrieved because it contained the word children in the abstract – **this paper was eliminated by the NOT child\* component of the search**

4. Gaynor, Habermann, B., & Wright, R. (2018). Waist Circumference Measurement Diffusion in Primary Care. *Journal for Nurse Practitioners*, 14(9), 683–688.e1. <https://doi.org/10.1016/j.nurpra.2018.06.002>

This paper is indexed in CINAHL, however was not retrieved because it **does not contain any term obesity in the article record in CINAHL.**

**Supplementary Table S2: List of excluded studies with reasons***Quantitative studies*

- Did not meet eligibility criteria for population and setting[1-19]
- Did not meet eligibility criteria for patient factor[1 2 5-9 11-14 16 18-27]
- Did not meet eligibility criteria for outcome[1 5 6 8 9 11-13 16 18 19 23 28-51]

*Qualitative studies*

- Did not meet eligibility criteria for population and setting[52]
- Did not meet eligibility criteria for interest[5 6 18 20 28 29 31 52-62]

Supplementary Table S3: Characteristics and summary of quantitative studies reviewed

| Study details                                                                                                                                                                      | Population and setting                                                                                                                                                                                                                                                                                                                                                                                                                                                                                                                                                                                                | Patient factors (independent variables)                                                                                                                                                                                                   | Outcomes (obesity related anthropometric assessments) | Statistical methods, results/effect estimates                                                                                                                                                                                                                                                                                                                                                                                                                                                                                                                                                                                                                                                                 | Author's conclusions and reviewer's comments                                                                                                                                                                                                                                                                                                                                                                                                                                                                                           |
|------------------------------------------------------------------------------------------------------------------------------------------------------------------------------------|-----------------------------------------------------------------------------------------------------------------------------------------------------------------------------------------------------------------------------------------------------------------------------------------------------------------------------------------------------------------------------------------------------------------------------------------------------------------------------------------------------------------------------------------------------------------------------------------------------------------------|-------------------------------------------------------------------------------------------------------------------------------------------------------------------------------------------------------------------------------------------|-------------------------------------------------------|---------------------------------------------------------------------------------------------------------------------------------------------------------------------------------------------------------------------------------------------------------------------------------------------------------------------------------------------------------------------------------------------------------------------------------------------------------------------------------------------------------------------------------------------------------------------------------------------------------------------------------------------------------------------------------------------------------------|----------------------------------------------------------------------------------------------------------------------------------------------------------------------------------------------------------------------------------------------------------------------------------------------------------------------------------------------------------------------------------------------------------------------------------------------------------------------------------------------------------------------------------------|
| <p><b>Authors:</b><br/>Aleem et al. [63]</p> <p><b>Year published:</b><br/>2015</p> <p><b>Study design:</b><br/>Cross sectional study</p> <p><b>Country:</b><br/>United States</p> | <p><b>Sample size:</b><br/>N=10,931 records</p> <p><b>Inclusion criteria:</b></p> <ul style="list-style-type: none"> <li>Patients aged 18-65 years before or during the study period</li> </ul> <p><b>Exclusion criteria:</b></p> <ul style="list-style-type: none"> <li>Visits with missing data</li> </ul> <p><b>Setting and population:</b></p> <ul style="list-style-type: none"> <li>Records from Dartmouth-Hitchcock Medical Center data repository system for the year 2012 for the patients coming for preventive care visit in 3 adult primary care center within the system in New Hampshire, US</li> </ul> | <p><b>1. Factors associated with BMI calculation:</b></p> <ul style="list-style-type: none"> <li>Insurance type</li> </ul>                                                                                                                | <p>BMI calculation</p>                                | <p><b>Statistical analysis:</b></p> <ul style="list-style-type: none"> <li>Descriptive for proportions</li> <li>Chi-square test or a Fisher's test to find association of the variable with the BMI recording (not relevant to calculated PR below)</li> </ul> <p><b>Results/effects estimates:</b></p> <p>1. Factors associated with BMI calculation:</p> <ul style="list-style-type: none"> <li>Insurance type: (Medicaid Calculated PR*: 1.04, Medicare Calculated PR*: 1.01, others including managed care Calculated PR*: 1.02, Self-pay Calculated PR*: 0.97, Ref Private insurance)</li> </ul>                                                                                                         | <p><b>Author's conclusions:</b><br/>"Despite high clinician-reported documentation of obesity as an active problem, actual obesity documentation rates remained low in a rural academic medical center."</p> <p><b>Reviewer's comments:</b><br/>This study shows that patients with Medicare and Medicaid insurance were positively associated with BMI calculation and patients on self-pay were negatively associated with BMI calculation.</p> <p>This study has clearly met 5/8 (63%) criteria in the critical appraisal tool.</p> |
| <p><b>Authors:</b><br/>Baer et al. [64]</p> <p><b>Year published:</b><br/>2013</p> <p><b>Study design:</b><br/>Cross sectional study</p> <p><b>Country:</b><br/>United States</p>  | <p><b>Sample size:</b><br/>N=219,356</p> <p><b>Inclusion criteria:</b></p> <ul style="list-style-type: none"> <li>Patients aged <math>\geq 18</math> years before or during the study period</li> <li>Patients who had at least 2 visits with the same clinician</li> <li>Patients who were not pregnant at the time of the visit</li> </ul> <p><b>Exclusion criteria:</b><br/>None</p> <p><b>Setting and population:</b></p>                                                                                                                                                                                         | <p><b>1. Factors associated with documentation of BMI:</b></p> <ul style="list-style-type: none"> <li>Age</li> <li>Sex</li> <li>Ethnicity</li> <li>Primary insurance</li> <li>Frequency of consultation</li> <li>Comorbidities</li> </ul> | <p>BMI documentation</p>                              | <p><b>Statistical analysis:</b></p> <ul style="list-style-type: none"> <li>Descriptive for proportions</li> <li>Logistic regression to estimate OR for documentation of BMI, adjusted for covariates</li> </ul> <p><b>Results/effects estimates:</b><br/>Proportion of patients with at least one BMI documentation between 2004 and 2008:</p> <ul style="list-style-type: none"> <li>65.9% had BMI documented</li> </ul> <p>1. Predictors of BMI documentation:</p> <ul style="list-style-type: none"> <li>Age (<math>\geq 70</math>y OR: 0.60, 60-69y OR: 0.94, 30-39y OR: 0.93, Ref 18-29y)</li> <li>Sex: Female (OR: 1.45, Ref male)</li> <li>Ethnicity (other or missing OR: 0.84, Ref White)</li> </ul> | <p><b>Author's conclusions:</b><br/>"In conclusion, many primary care patients lack documentation of BMI in the EHR, and most overweight and obese patients do not have a diagnosis on the problem list. Further research should focus on interventions to improve documentation of BMI and diagnosis and management of overweight and obesity in the primary care setting."</p> <p><b>Reviewer's comments:</b></p>                                                                                                                    |

|                                                                                                                                                                                                            |                                                                                                                                                                                                                                                                                                                                                                                                                                                                                                                                                                                 |                                                                                                                                                                                                                                                                  |                   |                                                                                                                                                                                                                                                                                                                                                                                                                                                                                                                                                                                                                                                                                                                             |                                                                                                                                                                                                                                                                                                                                                                                                                                                                                                                                                                      |
|------------------------------------------------------------------------------------------------------------------------------------------------------------------------------------------------------------|---------------------------------------------------------------------------------------------------------------------------------------------------------------------------------------------------------------------------------------------------------------------------------------------------------------------------------------------------------------------------------------------------------------------------------------------------------------------------------------------------------------------------------------------------------------------------------|------------------------------------------------------------------------------------------------------------------------------------------------------------------------------------------------------------------------------------------------------------------|-------------------|-----------------------------------------------------------------------------------------------------------------------------------------------------------------------------------------------------------------------------------------------------------------------------------------------------------------------------------------------------------------------------------------------------------------------------------------------------------------------------------------------------------------------------------------------------------------------------------------------------------------------------------------------------------------------------------------------------------------------------|----------------------------------------------------------------------------------------------------------------------------------------------------------------------------------------------------------------------------------------------------------------------------------------------------------------------------------------------------------------------------------------------------------------------------------------------------------------------------------------------------------------------------------------------------------------------|
|                                                                                                                                                                                                            | <ul style="list-style-type: none"> <li>Records from 25 primary care practices within a large academic care network in Boston, Massachusetts, US, between 2004 and 2008</li> </ul>                                                                                                                                                                                                                                                                                                                                                                                               |                                                                                                                                                                                                                                                                  |                   | <ul style="list-style-type: none"> <li>Primary insurance (Medicare OR: 0.94, no insurance or self-pay OR: 0.64, Ref private)</li> <li>Frequency of consultation (6-9 OR: 1.87, 10-14 OR: 2.78, <math>\geq 15</math> OR: 4.66, Ref 2-5)</li> <li>Number of obesity-related comorbidities (1 OR: 1.34, 2 OR: 1.48, <math>\geq 3</math> OR: 1.73, Ref 0 comorbidity)</li> </ul>                                                                                                                                                                                                                                                                                                                                                | <p>This study shows that female sex, other or missed ethnicity, younger age, having private insurance, increasing number of visits to clinic, and increasing number of chronic medical conditions were positively associated with BMI documentation.</p> <p>This study has clearly met 8/8 (100%) criteria in the critical appraisal tool.</p>                                                                                                                                                                                                                       |
| <p><b>Authors:</b><br/>Bleich, Pickett-Blakely &amp; Cooper [65]</p> <p><b>Year published:</b><br/>2011</p> <p><b>Study design:</b><br/>Cross sectional study</p> <p><b>Country:</b><br/>United States</p> | <p><b>Sample size:</b><br/>N=2,458</p> <p><b>Inclusion criteria:</b></p> <ul style="list-style-type: none"> <li>Patients aged <math>\geq 18</math> years</li> <li>Patients who had a BMI of <math>\geq 30</math> kg/m<sup>2</sup></li> </ul> <p><b>Exclusion criteria:</b><br/>None</p> <p><b>Setting and population:</b></p> <ul style="list-style-type: none"> <li>Records of patients from participating non-federally employed physicians in 2005 National Ambulatory Medical Care Survey from randomly selected geographic area and speciality in United States</li> </ul> | <p><b>1. Factors associated with obesity diagnosis:</b></p> <ul style="list-style-type: none"> <li>Race/ethnicity</li> <li>Sex</li> <li>Age</li> <li>Insurance</li> <li>Geographic region</li> <li>Co-morbidity risk status</li> <li>Obesity category</li> </ul> | Obesity diagnosis | <p><b>Statistical analysis:</b></p> <ul style="list-style-type: none"> <li>Descriptive for proportions</li> <li>Logistic regression to estimate OR for obesity diagnosis, adjusted for covariates</li> </ul> <p><b>Results/effects estimates:</b><br/>Proportion of patients with obesity diagnosis at the time of survey:</p> <ul style="list-style-type: none"> <li>28.9% had obesity diagnosis</li> </ul> <p>1. Predictors of BMI documentation:</p> <ul style="list-style-type: none"> <li>Sex: Women (OR: 1.54, Ref men)</li> <li>Age (18-29y OR: 2.61, Ref <math>\geq 65</math>y)</li> <li>Geographic region (Midwest OR: 1.78, Ref South)</li> <li>Obesity Class (III OR: 4.36, II OR: 2.08, Ref Class I)</li> </ul> | <p><b>Author's conclusions:</b><br/>"Most obese patients do not receive an obesity diagnosis or weight-related counseling. Practice implications: Preventive visits may provide a key opportunity for obese patients to receive weight-related counseling from their physician"</p> <p><b>Reviewer's comments:</b><br/>This study shows that female sex, younger age, having severe obesity, and residing in Midwest US were positively associated with obesity diagnosis.</p> <p>This study has clearly met 8/8 (100%) criteria in the critical appraisal tool.</p> |
| <p><b>Authors:</b><br/>Booth, Prevost &amp; Gulliford [66]</p>                                                                                                                                             | <p><b>Sample size:</b><br/>N=67,000</p> <p><b>Inclusion criteria:</b></p> <ul style="list-style-type: none"> <li>Patients who had BMI <math>&gt; 30</math> kg/m<sup>2</sup> or a READ</li> </ul>                                                                                                                                                                                                                                                                                                                                                                                | <p><b>1. Factors associated with BMI recording:</b></p> <ul style="list-style-type: none"> <li>Sex</li> <li>Age</li> <li>BMI category</li> <li>Medical code (READ) recorded</li> </ul>                                                                           | BMI records       | <p><b>Statistical analysis:</b></p> <ul style="list-style-type: none"> <li>Descriptive for proportions</li> <li>Poisson regression to estimate Relative Rate Ratio (RRR) for BMI recordings, adjusted for covariates</li> <li>Person-time was used as an offset and the regression model was clustered to allow differences in recording between practices</li> </ul>                                                                                                                                                                                                                                                                                                                                                       | <p><b>Author's conclusions:</b><br/>"Obese patients do not have BMI values recorded regularly. The mean BMI of obese patients, and the proportion gaining weight</p>                                                                                                                                                                                                                                                                                                                                                                                                 |

|                                                                                                                                                                                 |                                                                                                                                                                                                                                                                                                                                                                                                                                                                                                                                                                                      |                                                                                                                                                                                                                                          |                                              |                                                                                                                                                                                                                                                                                                                                                                                                                                                                                                                                                                                                                                                                                                                                                                                                                                                                                                                                                                                                                                                                                                                                                                                                                                                                                   |                                                                                                                                                                                                                                                                                                                                                                                                                                                                                                                                                                                                                                                              |
|---------------------------------------------------------------------------------------------------------------------------------------------------------------------------------|--------------------------------------------------------------------------------------------------------------------------------------------------------------------------------------------------------------------------------------------------------------------------------------------------------------------------------------------------------------------------------------------------------------------------------------------------------------------------------------------------------------------------------------------------------------------------------------|------------------------------------------------------------------------------------------------------------------------------------------------------------------------------------------------------------------------------------------|----------------------------------------------|-----------------------------------------------------------------------------------------------------------------------------------------------------------------------------------------------------------------------------------------------------------------------------------------------------------------------------------------------------------------------------------------------------------------------------------------------------------------------------------------------------------------------------------------------------------------------------------------------------------------------------------------------------------------------------------------------------------------------------------------------------------------------------------------------------------------------------------------------------------------------------------------------------------------------------------------------------------------------------------------------------------------------------------------------------------------------------------------------------------------------------------------------------------------------------------------------------------------------------------------------------------------------------------|--------------------------------------------------------------------------------------------------------------------------------------------------------------------------------------------------------------------------------------------------------------------------------------------------------------------------------------------------------------------------------------------------------------------------------------------------------------------------------------------------------------------------------------------------------------------------------------------------------------------------------------------------------------|
| <p><b>Year published:</b><br/>2013</p> <p><b>Study design:</b><br/>Cohort study</p> <p><b>Country:</b><br/>United Kingdom</p>                                                   | <p>medical diagnosis code indicating obesity</p> <p><b>Exclusion criteria:</b></p> <ul style="list-style-type: none"> <li>Person-time outside the age range of 18-100 years</li> </ul> <p><b>Setting and population:</b></p> <ul style="list-style-type: none"> <li>Records from 127 family practices in UK GPRD which contained EHR from 600 general practices in the United Kingdom, between 1 January 1997 and 31 December 2009</li> </ul>                                                                                                                                        | <ul style="list-style-type: none"> <li>Socio-economic relative deprivation</li> </ul>                                                                                                                                                    |                                              | <p><b>Results/effects estimates:</b></p> <p>Proportion of patients with a BMI recording:</p> <ul style="list-style-type: none"> <li>99.2% of all patients at some point between 1 January 1997 and 31 December 2009.</li> </ul> <p>1. Predictors of BMI recording:</p> <ul style="list-style-type: none"> <li>Sex: Female (RRR: 1.14, Ref male)</li> <li>Age (18-24y RRR: 0.85, 25-34y RRR: 0.65, 35-44y RRR: 0.62, 45-54y RRR: 0.75, 55-64y RRR: 0.87, 75-100y RRR: 0.83, Ref 65-74y)</li> <li>BMI category (obesity class I RRR: 0.78, obesity class III RRR: 1.19, unknown RRR: 0.24, Ref overweight)</li> <li>Medical code recorded: 'yes' (RRR: 1.46, Ref 'no')</li> <li>Smoking status (ex-smoker RRR: 1.22, smoker RRR: 0.93, not known RRR: 0.96, Ref non-smoker)</li> <li>Index of multiple deprivation: IMD Quintile (3 RRR: 1.19, 4 RRR: 1.19, 5 RRR: 1.21, Ref Quintile 1 least deprived)</li> </ul>                                                                                                                                                                                                                                                                                                                                                                  | <p>over time, is increasing. Improved strategies for monitoring and managing obesity are required.”</p> <p><b>Reviewer’s comments:</b></p> <p>This study shows that several socio demographics (aged 65-74 years, female sex, increasing socio-economic deprivation), behavioural factors (former smoking), and obesity class II/III and known BMI were positively associated with BMI recordings.</p> <p>This study has clearly met 9/10 (90%) criteria in the critical appraisal tool.</p>                                                                                                                                                                 |
| <p><b>Authors:</b><br/>Bramlage et al. [67]</p> <p><b>Year published:</b><br/>2004</p> <p><b>Study design:</b><br/>Cross sectional study</p> <p><b>Country:</b><br/>Germany</p> | <p><b>Sample size:</b><br/>N=45,125</p> <p><b>Inclusion criteria:</b></p> <ul style="list-style-type: none"> <li>Patients attending the target day assessment (half day, alternatively September 18 or 20, 2001)</li> </ul> <p><b>Exclusion criteria:</b></p> <ul style="list-style-type: none"> <li>Patients who had a BMI of &lt;18.5 kg/m<sup>2</sup></li> </ul> <p><b>Setting and population:</b></p> <ul style="list-style-type: none"> <li>Records of patients from participating 1912 primary care practices in HYDRA study performed in September 2001 in Germany</li> </ul> | <p><b>1. Factors associated with poor recognition of overweight and obesity:</b></p> <ul style="list-style-type: none"> <li>Age</li> <li>Sex</li> <li>Diagnosis with vascular complications</li> <li>Numbers of comorbidities</li> </ul> | <p>Recognition of overweight and obesity</p> | <p><b>Statistical analysis:</b></p> <ul style="list-style-type: none"> <li>Descriptive for proportions</li> <li>Logistic regression to estimate OR for poor recognition of overweight and obesity, adjusted for covariates</li> </ul> <p><b>Results/effects estimates:</b></p> <p>Proportion of patients with recognition of overweight and obesity by the doctor at the time of survey:</p> <ul style="list-style-type: none"> <li>20-30% of overweight patients had recognition of overweight</li> <li>60-70% of patients with grade 3 obesity had recognition of obesity</li> </ul> <p>1. Predictors of poor recognition of obesity:</p> <ul style="list-style-type: none"> <li>Sex: female (OR: 1.40, Ref male)</li> <li>Age (≥60y OR: 1.60, 40-59y OR: 1.50, Ref 30-40y)</li> <li>Diagnosis with vascular complications: yes (OR: 2.10, Ref no)</li> <li>Comorbid conditions (3-4 OR: 3.40, ≥5 OR: 6.40, Ref none)</li> </ul> <p>2. Predictors of poor recognition of overweight:</p> <ul style="list-style-type: none"> <li>Sex: female (OR: 1.30, Ref male)</li> <li>Age (≥60y OR: 1.90, 40-59y OR: 1.60, Ref 30-40y)</li> <li>Diagnosis with vascular complications: yes (OR: 2.20, Ref no)</li> <li>Comorbid conditions (3-4 OR: 3.30, ≥5 OR: 5.10, Ref none)</li> </ul> | <p><b>Author’s conclusions:</b></p> <p>“Primary care management of overweight and obesity is largely deficient, predominantly due to four interrelated factors: doctors’ poor recognition of patients’ weight status, doctors’ inefficient efforts at intervention, patients’ poor acceptance of such interventions and dissatisfaction with existing life-style modification strategies.”</p> <p><b>Reviewer’s comments:</b></p> <p>This study shows that female sex, older age, having diagnosis with vascular complications and increased number of comorbid conditions were positively associated with poor recognition of obesity by their doctors.</p> |

|                                                                                                                                                                                                    |                                                                                                                                                                                                                                                                                                                                                                                                                                                                                                                                                                                                          |                                                                                                                                                                                                                                                                                          |                    |                                                                                                                                                                                                                                                                                                                                                                                                                                                                                                                                                                                                                                                                                                                                                                                                                                                                                                                                                                                                                                               |                                                                                                                                                                                                                                                                                                                                                                                                                                                                                                                                                                                                                                                                                                                                                                                                                                                                                                                                                                                                                                                                   |
|----------------------------------------------------------------------------------------------------------------------------------------------------------------------------------------------------|----------------------------------------------------------------------------------------------------------------------------------------------------------------------------------------------------------------------------------------------------------------------------------------------------------------------------------------------------------------------------------------------------------------------------------------------------------------------------------------------------------------------------------------------------------------------------------------------------------|------------------------------------------------------------------------------------------------------------------------------------------------------------------------------------------------------------------------------------------------------------------------------------------|--------------------|-----------------------------------------------------------------------------------------------------------------------------------------------------------------------------------------------------------------------------------------------------------------------------------------------------------------------------------------------------------------------------------------------------------------------------------------------------------------------------------------------------------------------------------------------------------------------------------------------------------------------------------------------------------------------------------------------------------------------------------------------------------------------------------------------------------------------------------------------------------------------------------------------------------------------------------------------------------------------------------------------------------------------------------------------|-------------------------------------------------------------------------------------------------------------------------------------------------------------------------------------------------------------------------------------------------------------------------------------------------------------------------------------------------------------------------------------------------------------------------------------------------------------------------------------------------------------------------------------------------------------------------------------------------------------------------------------------------------------------------------------------------------------------------------------------------------------------------------------------------------------------------------------------------------------------------------------------------------------------------------------------------------------------------------------------------------------------------------------------------------------------|
|                                                                                                                                                                                                    |                                                                                                                                                                                                                                                                                                                                                                                                                                                                                                                                                                                                          |                                                                                                                                                                                                                                                                                          |                    |                                                                                                                                                                                                                                                                                                                                                                                                                                                                                                                                                                                                                                                                                                                                                                                                                                                                                                                                                                                                                                               | This study has clearly met 7/8 (88%) criteria in the critical appraisal tool. One of the criteria was unclear.                                                                                                                                                                                                                                                                                                                                                                                                                                                                                                                                                                                                                                                                                                                                                                                                                                                                                                                                                    |
| <p><b>Authors:</b><br/>Cuccu, Abi-Aad &amp; Duggal [68]</p> <p><b>Year published:</b><br/>2019</p> <p><b>Study design:</b><br/>Cross sectional study</p> <p><b>Country:</b><br/>United Kingdom</p> | <p><b>Sample size:</b><br/>N=1,154,652</p> <p><b>Inclusion criteria:</b></p> <ul style="list-style-type: none"> <li>• Patients aged 18-100 years</li> <li>• Patients residing in the Kent County Council, who were alive and registered in Kent general practice as of 6 August 2018</li> </ul> <p><b>Exclusion criteria:</b></p> <ul style="list-style-type: none"> <li>• None</li> </ul> <p><b>Setting and population:</b></p> <ul style="list-style-type: none"> <li>• Records of patients from Kent Integrated Dataset in September 2001 in the Kent, UK, between 2015/2016 and 2017/2018</li> </ul> | <p><b>1. Factors associated with null BMI recording</b></p> <ul style="list-style-type: none"> <li>• Sex</li> <li>• Age</li> <li>• Socio-economic relative deprivation</li> <li>• Diagnosis of hypertension</li> <li>• Diagnosis of SMI</li> <li>• Presence of multimorbidity</li> </ul> | Null BMI recording | <p><b>Statistical analysis:</b></p> <ul style="list-style-type: none"> <li>• Descriptive for proportions</li> <li>• Logistic regression to estimate OR for null BMI recording, adjusted for covariates</li> </ul> <p><b>Results/effects estimates:</b><br/>Proportion of patients with a missing BMI between 2015/2016 and 2017/2018:</p> <ul style="list-style-type: none"> <li>• 56.3% had null BMI recorded</li> </ul> <p>1. Predictors of null BMI recording:</p> <ul style="list-style-type: none"> <li>• Sex: Male (OR: 1.58, Ref female)</li> <li>• Age (<math>\geq 95</math>y OR: 1.49, 85-94y OR: 0.90, 75-84y OR: 0.62, 65-74y OR: 0.47, 55-64y OR: 0.49, 45-54y OR: 0.53, 35-44y OR: 0.62, 25-34y OR: 0.66, Ref 18-24y)</li> <li>• Socioeconomic deprivation Quintile (3 OR: 0.97, 4: 0.89, Ref Quintile 1 Least deprived)</li> <li>• Diagnosis of hypertension (OR: 0.76, Ref none)</li> <li>• Diagnosis of SMI (OR: 0.62, Ref none)</li> <li>• Presence of multimorbidity (OR: 0.39, Ref 0 or 1 long term conditions)</li> </ul> | <p><b>Author's conclusions:</b><br/>"Findings were aligned to previous research using nationally representative samples. Completeness of recording varied by age, sex, deprivation, and comorbidity. Recording within general practice was aligned to chronic disease management. From a prevention perspective, earlier assessment, and intervention for the management of excess weight within primary care may be an opportunity for avoiding increases in BMI trajectory. There may also be merit in recognising that the external disease agents that influence obesity can be controlled or reduced (obesogenic environment) from a national policy perspective. Such a perspective may also help reduce stigmatisation and the pressure around arguments that centre on personal responsibility for obesity."</p> <p><b>Reviewer's comments:</b><br/>This study shows that socio demographics (aged 95y and above and male sex) were positively associated with null BMI recording, while being aged 25 to 94y, increasing socio-economic deprivation,</p> |



|                                                                                                                                                                                  |                                                                                                                                                                                                                                                                                                                                                                                                                                                                                                                                                                                                                                                                |                                                                                                                                                                                                                                                                                                                                                                              |                                                                                                      |                                                                                                                                                                                                                                                                                                                                                                                                                                                                                                                                                                                                                                                                                                                                                                                                                                                                                                                                                                                                                                                                                                                                         |                                                                                                                                                                                                                                                                                                                                                                                                                                                                                                                                                                                                                             |
|----------------------------------------------------------------------------------------------------------------------------------------------------------------------------------|----------------------------------------------------------------------------------------------------------------------------------------------------------------------------------------------------------------------------------------------------------------------------------------------------------------------------------------------------------------------------------------------------------------------------------------------------------------------------------------------------------------------------------------------------------------------------------------------------------------------------------------------------------------|------------------------------------------------------------------------------------------------------------------------------------------------------------------------------------------------------------------------------------------------------------------------------------------------------------------------------------------------------------------------------|------------------------------------------------------------------------------------------------------|-----------------------------------------------------------------------------------------------------------------------------------------------------------------------------------------------------------------------------------------------------------------------------------------------------------------------------------------------------------------------------------------------------------------------------------------------------------------------------------------------------------------------------------------------------------------------------------------------------------------------------------------------------------------------------------------------------------------------------------------------------------------------------------------------------------------------------------------------------------------------------------------------------------------------------------------------------------------------------------------------------------------------------------------------------------------------------------------------------------------------------------------|-----------------------------------------------------------------------------------------------------------------------------------------------------------------------------------------------------------------------------------------------------------------------------------------------------------------------------------------------------------------------------------------------------------------------------------------------------------------------------------------------------------------------------------------------------------------------------------------------------------------------------|
|                                                                                                                                                                                  |                                                                                                                                                                                                                                                                                                                                                                                                                                                                                                                                                                                                                                                                |                                                                                                                                                                                                                                                                                                                                                                              |                                                                                                      |                                                                                                                                                                                                                                                                                                                                                                                                                                                                                                                                                                                                                                                                                                                                                                                                                                                                                                                                                                                                                                                                                                                                         | diagnosis of hypertension, SMI and presence of multimorbidity were negatively associated with null BMI recording.<br><br>This study has clearly met 8/8 (100%) criteria in the critical appraisal tool.                                                                                                                                                                                                                                                                                                                                                                                                                     |
| <p><b>Authors:</b><br/>Cyr et al. [69]</p> <p><b>Year published:</b><br/>2016</p> <p><b>Study design:</b><br/>Cross sectional study</p> <p><b>Country:</b><br/>United States</p> | <p><b>Sample size:</b><br/>N=6,195</p> <p><b>Inclusion criteria:</b></p> <ul style="list-style-type: none"> <li>• Patients aged <math>\geq 18</math> years</li> <li>• Patients who had a BMI <math>\geq 25</math> kg/m<sup>2</sup></li> </ul> <p><b>Exclusion criteria:</b></p> <ul style="list-style-type: none"> <li>• Patients who were pregnant at the time of visit</li> </ul> <p><b>Setting and population:</b></p> <ul style="list-style-type: none"> <li>• Records of patients from family medicine residency program with two sites (urban and suburban), with 17 faculty and 21 residents in United States between December 2011 and 2013</li> </ul> | <p><b>1. Factors associated with inclusion of obesity and/or overweight in the problem list:</b></p> <ul style="list-style-type: none"> <li>• Sex</li> <li>• Age</li> <li>• Race</li> <li>• Insurance</li> <li>• BMI</li> <li>• Presence of hypertension</li> <li>• Presence of type 2 diabetes</li> <li>• Presence of hyperlipidemia</li> <li>• Numbers of visit</li> </ul> | <p>Overweight/obesity documentation (inclusion of obesity and/or overweight in the problem list)</p> | <p><b>Statistical analysis:</b></p> <ul style="list-style-type: none"> <li>• Descriptive for proportions</li> <li>• Multivariate regression to estimate OR for overweight/obesity documentation, adjusted for covariates</li> </ul> <p><b>Results/effects estimates:</b><br/>Proportion of patients with overweight/obesity documentation between December 2011 and 2013:</p> <ul style="list-style-type: none"> <li>• 21.1% had overweight/obesity documentation</li> </ul> <p>1. Predictors of null overweight/obesity documentation:</p> <ul style="list-style-type: none"> <li>• Sex: Female (OR: 1.48, Ref male)</li> <li>• Insurance (Medicaid OR: 0.72, Ref commercial insurance)</li> <li>• BMI (<math>\geq 40</math> kg/m<sup>2</sup> OR: 24.78, 30-<math>&lt;40</math> kg/m<sup>2</sup> OR: 5.36, Ref 25-<math>&lt;30</math> kg/m<sup>2</sup>)</li> <li>• Presence of hypertension: yes (OR: 1.25, Ref no)</li> <li>• Presence of type 2 diabetes: yes (OR: 1.48, Ref no)</li> <li>• Presence of hyperlipidemia: yes (OR: 1.28, Ref no)</li> <li>• Number of visits (<math>\geq 6</math> OR: 1.39, Ref 1-2 visits)</li> </ul> | <p><b>Author's conclusions:</b><br/>“Nearly 80% of OW and obese patients were not identified on the problem list. Patient gender, comorbidity, and number of visits were associated with documentation. Future research should examine automatic documentation of OW/obesity on the medical problem list.”</p> <p><b>Reviewer's comments:</b><br/>This study shows that female sex, higher BMI, presence of hypertension, type 2 diabetes and dyslipidaemia were positively associated with overweight and obesity documentation.</p> <p>This study has clearly met 8/8 (100%) criteria in the critical appraisal tool.</p> |
| <p><b>Authors:</b><br/>Dalton et al. [70]</p> <p><b>Year published:</b><br/>2011</p> <p><b>Study design:</b><br/>Cross sectional study</p>                                       | <p><b>Sample size:</b><br/>N=21,510</p> <p><b>Inclusion criteria:</b></p> <ul style="list-style-type: none"> <li>• Patients aged 35-74 years during the study period</li> <li>• Patients who had anthropometric measurement taken in last 5 years</li> </ul> <p><b>Exclusion criteria:</b></p>                                                                                                                                                                                                                                                                                                                                                                 | <p><b>1. Factors associated with BMI recording:</b></p> <ul style="list-style-type: none"> <li>• Sex/Age</li> <li>• Ethnicity</li> <li>• Socio-economic relative deprivation</li> <li>• Hypertension</li> </ul>                                                                                                                                                              | <p>BMI records</p>                                                                                   | <p><b>Statistical analysis:</b></p> <ul style="list-style-type: none"> <li>• Descriptive for proportions</li> <li>• Logistic regression to estimate OR for BMI recordings, adjusted for covariates</li> </ul> <p><b>Results/effects estimates:</b><br/>Proportion of patients with a BMI recording between December 2008 and January 2009:</p> <ul style="list-style-type: none"> <li>• 72.8% of all patients</li> </ul> <p>1. Predictors of BMI recording:</p>                                                                                                                                                                                                                                                                                                                                                                                                                                                                                                                                                                                                                                                                         | <p><b>Author's conclusions:</b><br/>“The workload implications of the NHS Health Checks programme for general practices in England are substantial. There are considerable variations in risk factor recording between practices and between age, gender and ethnic groups.”</p>                                                                                                                                                                                                                                                                                                                                            |

|                                                                                                                                                                                        |                                                                                                                                                                                                                                                                                                                                                                                                                                                                                                                                                                                                                                                                                                                                                                                                                                                                                                                                                 |                                                                                                                                                                         |                                            |                                                                                                                                                                                                                                                                                                                                                                                                                                                                                                                                                                                                                                                                                                                                                                                                                                                                                                                                                                                                                                                                                                                                                                                                                                                                                                                                                                                                                                                                                                                                                                                            |                                                                                                                                                                                                                                                                                                                                                                                                                                                                                                                                                                                                                     |
|----------------------------------------------------------------------------------------------------------------------------------------------------------------------------------------|-------------------------------------------------------------------------------------------------------------------------------------------------------------------------------------------------------------------------------------------------------------------------------------------------------------------------------------------------------------------------------------------------------------------------------------------------------------------------------------------------------------------------------------------------------------------------------------------------------------------------------------------------------------------------------------------------------------------------------------------------------------------------------------------------------------------------------------------------------------------------------------------------------------------------------------------------|-------------------------------------------------------------------------------------------------------------------------------------------------------------------------|--------------------------------------------|--------------------------------------------------------------------------------------------------------------------------------------------------------------------------------------------------------------------------------------------------------------------------------------------------------------------------------------------------------------------------------------------------------------------------------------------------------------------------------------------------------------------------------------------------------------------------------------------------------------------------------------------------------------------------------------------------------------------------------------------------------------------------------------------------------------------------------------------------------------------------------------------------------------------------------------------------------------------------------------------------------------------------------------------------------------------------------------------------------------------------------------------------------------------------------------------------------------------------------------------------------------------------------------------------------------------------------------------------------------------------------------------------------------------------------------------------------------------------------------------------------------------------------------------------------------------------------------------|---------------------------------------------------------------------------------------------------------------------------------------------------------------------------------------------------------------------------------------------------------------------------------------------------------------------------------------------------------------------------------------------------------------------------------------------------------------------------------------------------------------------------------------------------------------------------------------------------------------------|
| <p><b>Country:</b><br/>United Kingdom</p>                                                                                                                                              | <ul style="list-style-type: none"> <li>Patients in CVD or diabetes register</li> </ul> <p><b>Setting and population:</b></p> <ul style="list-style-type: none"> <li>Records from 14 general practices participating in the NHS Health Checks programme in Ealing Primary Care Trust (PCT), North West London, between December 2008 and January 2009</li> </ul>                                                                                                                                                                                                                                                                                                                                                                                                                                                                                                                                                                                 |                                                                                                                                                                         |                                            | <ul style="list-style-type: none"> <li>Sex/Age (male/65-74y OR: 0.68, male/55-64y OR: 0.55, male/45-54y OR: 0.47, male/35-44y OR: 0.46, Ref female/35-44y)</li> <li>Ethnicity (mixed OR:1.77, missing OR:0.31, Ref White)</li> <li>Socio-economic quintiles: deprivation fifth quintile (2 OR: 1.16, Ref quintile 1)</li> <li>Presence of hypertension: yes (OR:3.23, Ref no)</li> </ul>                                                                                                                                                                                                                                                                                                                                                                                                                                                                                                                                                                                                                                                                                                                                                                                                                                                                                                                                                                                                                                                                                                                                                                                                   | <p><b>Reviewer's comments:</b><br/>This study shows that female sex, mixed ethnicity, and having hypertension were positively associated with BMI recording.</p> <p>This study has clearly met 8/8 (100%) criteria in the critical appraisal tool.</p>                                                                                                                                                                                                                                                                                                                                                              |
| <p><b>Authors:</b><br/>Emanuel et al. [71]</p> <p><b>Year published:</b><br/>2016</p> <p><b>Study design:</b><br/>"Matched cohort study"</p> <p><b>Country:</b><br/>United Kingdom</p> | <p><b>Sample size:</b><br/>N=14,586<br/>(RA case: 1121, RA control: 4282, IBD case: 1875, IBD control: 7308)</p> <p><b>Inclusion criteria:</b></p> <ul style="list-style-type: none"> <li>Case: Patients diagnosed with Rheumatoid Arthritis (RA) and Inflammatory Bowel Disease (IBD) (including ulcerative colitis and Crohn's disease) as per READ code on study date</li> <li>Control: Patients matched on age, gender and general practice with randomly sampled from all patients who were disease free</li> <li>Patients registered uninterruptedly</li> <li>with the practice for specified data collection timepoints</li> </ul> <p><b>Exclusion criteria:</b></p> <ul style="list-style-type: none"> <li>None</li> </ul> <p><b>Setting and population:</b></p> <ul style="list-style-type: none"> <li>Records of patients registered with local general practices on study date of 12 January 2014 from Lambeth DataNet, a</li> </ul> | <p><b>1. Factors associated with BMI recording and obesity diagnosis:</b></p> <ul style="list-style-type: none"> <li>Presence of RA</li> <li>Presence of IBD</li> </ul> | <p>BMI recording and obesity diagnosis</p> | <p><b>Statistical analysis:</b></p> <ul style="list-style-type: none"> <li>Descriptive for proportions</li> <li>Conditional Poisson regression to estimate OR for BMI recording at the prespecified time point (1 year before, 1 year after and 5 years after case index date), adjusted for age, gender, ethnicity and deprivation</li> </ul> <p><b>Results/effects estimates:</b><br/>Proportion of patients with BMI recording from study time points (from case index date):</p> <ul style="list-style-type: none"> <li>RA case: 13%, 13% and 34% for 1 year before, 1 year after and 5 years after, respectively</li> <li>RA control: 10%, 8% and 28% for 1 year before, 1 year after and 5 years after, respectively</li> <li>IBD case: 8%, 12% and 27% for 1 year before, 1 year after and 5 years after, respectively</li> <li>IBD control: 10%, 8% and 22% for 1 year before, 1 year after and 5 years after, respectively</li> </ul> <p>1. Estimated differences in BMI recording (Ref control group, time duration from case index date):</p> <ul style="list-style-type: none"> <li>Presence of RA: OR: 1.52 and OR: 1.49 for 1 year before and 1 year after, respectively</li> <li>Presence of IBD: OR: 2.24, OR: 1.61 and OR: 1.31 for 1 year before, 1 year after and 5 years after, respectively</li> </ul> <p>2. Estimated differences in obesity diagnosis (Ref control group, time duration from case index date):</p> <ul style="list-style-type: none"> <li>Presence of RA: OR: 1.64 for 1 year after</li> <li>Presence of IBD: OR: 0.77 for 5 years after</li> </ul> | <p><b>Author's conclusions:</b><br/>"The assessment and treatment of vascular risk in patients with RA and IBD in primary care is suboptimal, particularly with reference to CVD risk score calculation."</p> <p><b>Reviewer's comments:</b><br/>This study shows that presence of RA and IBD are positively associated with BMI recording. While the presence of RA is positively associated with obesity diagnosis, the presence of IBD is inversely associated with obesity diagnosis.</p> <p>This study has clearly met 7/8 (88%) criteria in the critical appraisal tool. One of the criteria was unclear.</p> |

|                                                                                                                                                                         |                                                                                                                                                                                                                                                                                                                                                                                                                                                                                                                                                                                                                    |                                                                                                                                                                                                                                                                                                                                                                                                                                                                                                                                                                                                                                                                                                                                                                                                                                                |               |                                                                                                                                                                                                                                                                                                                                                                                                                                                                                                                                                                                                                                                                                                                                                                                                                                                                                                                                                                                                                                    |                                                                                                                                                                                                                                                                                                                                                                                                                                                                                                                                                                                                                                                                                                                                                                                                                                                                                                          |
|-------------------------------------------------------------------------------------------------------------------------------------------------------------------------|--------------------------------------------------------------------------------------------------------------------------------------------------------------------------------------------------------------------------------------------------------------------------------------------------------------------------------------------------------------------------------------------------------------------------------------------------------------------------------------------------------------------------------------------------------------------------------------------------------------------|------------------------------------------------------------------------------------------------------------------------------------------------------------------------------------------------------------------------------------------------------------------------------------------------------------------------------------------------------------------------------------------------------------------------------------------------------------------------------------------------------------------------------------------------------------------------------------------------------------------------------------------------------------------------------------------------------------------------------------------------------------------------------------------------------------------------------------------------|---------------|------------------------------------------------------------------------------------------------------------------------------------------------------------------------------------------------------------------------------------------------------------------------------------------------------------------------------------------------------------------------------------------------------------------------------------------------------------------------------------------------------------------------------------------------------------------------------------------------------------------------------------------------------------------------------------------------------------------------------------------------------------------------------------------------------------------------------------------------------------------------------------------------------------------------------------------------------------------------------------------------------------------------------------|----------------------------------------------------------------------------------------------------------------------------------------------------------------------------------------------------------------------------------------------------------------------------------------------------------------------------------------------------------------------------------------------------------------------------------------------------------------------------------------------------------------------------------------------------------------------------------------------------------------------------------------------------------------------------------------------------------------------------------------------------------------------------------------------------------------------------------------------------------------------------------------------------------|
|                                                                                                                                                                         | patient level database of primary care EHR of over 350,000 people residing in Lambeth borough, London, United Kingdom                                                                                                                                                                                                                                                                                                                                                                                                                                                                                              |                                                                                                                                                                                                                                                                                                                                                                                                                                                                                                                                                                                                                                                                                                                                                                                                                                                |               |                                                                                                                                                                                                                                                                                                                                                                                                                                                                                                                                                                                                                                                                                                                                                                                                                                                                                                                                                                                                                                    |                                                                                                                                                                                                                                                                                                                                                                                                                                                                                                                                                                                                                                                                                                                                                                                                                                                                                                          |
| <p><b>Authors:</b><br/>Ghosh [72]</p> <p><b>Year published:</b><br/>2016</p> <p><b>Study design:</b><br/>Cross sectional study</p> <p><b>Country:</b><br/>Australia</p> | <p><b>Sample size:</b><br/>N=118,709</p> <p><b>Inclusion criteria:</b></p> <ul style="list-style-type: none"> <li>• Patients aged <math>\geq 18</math> years</li> </ul> <p><b>Exclusion criteria:</b></p> <ul style="list-style-type: none"> <li>• Patients without a recorded age and/or gender</li> </ul> <p><b>Setting and population:</b></p> <ul style="list-style-type: none"> <li>• Records of patients from 17 general practices in the Sentinel Practices Data Sourcing (SPDS) project in Illawarra Shoalhaven region of New South Wales, Australia between September 2011 and September 2013.</li> </ul> | <p><b>1. Factors associated with BMI recording:</b></p> <ul style="list-style-type: none"> <li>• Age</li> <li>• Sex</li> <li>• Presence of specific medical conditions: hypertension, hyperlipidaemia, musculoskeletal (osteoarthritis, osteoporosis and inflammatory arthritis), mental (bipolar, anxiety and depression), respiratory (asthma and chronic obstructive pulmonary disease), diabetes (type 1 and type 2 diabetes mellitus), cardiovascular (congestive heart disease, myocardial infarction, heart failure, acute coronary syndrome, peripheral vascular disease, left ventricular hypertrophy, atrial fibrillation and carotid stenosis), renal (renal artery stenosis, acute renal failure, chronic renal failure and renal impairment), stroke and cancer (cancer and multiple myeloma)</li> <li>• Disease count</li> </ul> | BMI recording | <p><b>Statistical analysis:</b></p> <ul style="list-style-type: none"> <li>• Descriptive for proportions</li> <li>• Multivariate regression to estimate OR for BMI recording, adjusted for SEIFA–IRSD and covariates</li> </ul> <p><b>Results/effects estimates:</b></p> <p>Proportion of patients with an anthropometry measurement between September 2011 and September 2013:</p> <ul style="list-style-type: none"> <li>• 30.9% had BMI recording</li> <li>• 8.0% had WC recording</li> </ul> <p>1. Predictors of BMI recording:</p> <ul style="list-style-type: none"> <li>• Age (<math>\geq 75</math>y OR: 1.17, 45–64y OR: 1.25, Ref 18–44y)</li> <li>• Presence of specific medical conditions: (hypertension OR: 1.11, hyperlipidaemia OR: 1.14, musculoskeletal OR: 1.21, mental OR: 0.80, respiratory OR: 0.91, diabetes OR: 1.83, cardiovascular OR: 1.14, renal OR: 1.52, Ref absence of specific medical condition)</li> <li>• Disease count (<math>\geq 3</math> OR: 5.18, 2 OR: 4.12, 1 OR: 2.65, Ref 0)</li> </ul> | <p><b>Author’s conclusions:</b></p> <p>“Recording of measures of obesity and overweight in general practices within regional settings is much lower than optimal. More support and advocacy around weighing patients at all interactions is required for regional general practitioners to increase the weight screening in primary care. These findings have policy-relevant implications for weight management in regional Australia.”</p> <p><b>Reviewer’s comments:</b></p> <p>This study shows that older age, presence of hypertension, hyperlipidaemia, musculoskeletal conditions, diabetes, cardiovascular conditions, renal conditions were positively associated with BMI recording. Presence of mental health conditions and respiratory conditions were negatively associated with BMI recording.</p> <p>This study has clearly met 8/8 (100%) criteria in the critical appraisal tool.</p> |

|                                                                                                                                                                                         |                                                                                                                                                                                                                                                                                                                                                                                                                                                                                                                                                                            |                                                                                                                                                                                                                                                                                                                                                                                                                                                                            |                                        |                                                                                                                                                                                                                                                                                                                                                                                                                                                                                                                                                                                                                                                                                                                                                                        |                                                                                                                                                                                                                                                                                                                                                                                                                                                                                                                                                               |
|-----------------------------------------------------------------------------------------------------------------------------------------------------------------------------------------|----------------------------------------------------------------------------------------------------------------------------------------------------------------------------------------------------------------------------------------------------------------------------------------------------------------------------------------------------------------------------------------------------------------------------------------------------------------------------------------------------------------------------------------------------------------------------|----------------------------------------------------------------------------------------------------------------------------------------------------------------------------------------------------------------------------------------------------------------------------------------------------------------------------------------------------------------------------------------------------------------------------------------------------------------------------|----------------------------------------|------------------------------------------------------------------------------------------------------------------------------------------------------------------------------------------------------------------------------------------------------------------------------------------------------------------------------------------------------------------------------------------------------------------------------------------------------------------------------------------------------------------------------------------------------------------------------------------------------------------------------------------------------------------------------------------------------------------------------------------------------------------------|---------------------------------------------------------------------------------------------------------------------------------------------------------------------------------------------------------------------------------------------------------------------------------------------------------------------------------------------------------------------------------------------------------------------------------------------------------------------------------------------------------------------------------------------------------------|
| <p><b>Authors:</b><br/>Gonzalez-Chica et al. [73]</p> <p><b>Year published:</b><br/>2019</p> <p><b>Study design:</b><br/>Cross sectional study</p> <p><b>Country:</b><br/>Australia</p> | <p><b>Sample size:</b><br/>N=2,384</p> <p><b>Inclusion criteria:</b></p> <ul style="list-style-type: none"> <li>• Patients aged <math>\geq 35</math> years</li> </ul> <p><b>Exclusion criteria:</b></p> <ul style="list-style-type: none"> <li>• Patients with a terminal illness or a mental incapacity</li> <li>• Patients who are unable to speak English</li> </ul> <p><b>Setting and population:</b></p> <ul style="list-style-type: none"> <li>• Data of Health Omnibus Survey 2017 conducted in South Australia between September 2017 and December 2017</li> </ul> | <p><b>1. Factors associated with weight and/or waist measurement (self-reported):</b></p> <ul style="list-style-type: none"> <li>• Presence of cardiometabolic risk factor (body mass index <math>\geq 30</math> kg/m<sup>2</sup>, hypertension, diabetes and/or dyslipidaemia, but without cardiovascular diseases)</li> <li>• Presence of cardiovascular disease (heart attack, angina, heart failure, and/or stroke, with or without metabolic risk factors)</li> </ul> | <p>Weight and/or waist measurement</p> | <p><b>Statistical analysis:</b></p> <ul style="list-style-type: none"> <li>• Maximum likelihood estimates (pseudolikelihood log) and Wald tests for heterogeneity and trend were used to estimate predicted prevalence, adjusted for covariates (not relevant to calculated PR below).</li> </ul> <p><b>Results/effects estimates:</b></p> <p>1. Predicted adjusted prevalence of weight and/or waist measurement by their GP in the last 12 months:</p> <ul style="list-style-type: none"> <li>• Presence of cardiometabolic risk factor: Yes (Calculated PR*: 1.43, Ref none)</li> <li>• Presence of cardiovascular disease: Yes (Calculated PR*: 1.81, Ref none)</li> </ul>                                                                                         | <p><b>Author's conclusions:</b></p> <p>“More frequent and comprehensive CVD-related assessments by GPs were more important in promoting a healthier lifestyle than the presence of CVD or cardiometabolic risk factors by themselves.”</p> <p><b>Reviewer's comments:</b></p> <p>This study shows higher prevalence of weight and/or waist measurement in patients with self-reported cardiometabolic risk factors and cardiovascular disease.</p> <p>This study has clearly met 8/8 (100%) criteria in the critical appraisal tool.</p>                      |
| <p><b>Authors:</b><br/>Gutiérrez Angulo et al. [74]</p> <p><b>Year published:</b><br/>2014</p> <p><b>Study design:</b><br/>Cross sectional study</p> <p><b>Country:</b><br/>Spain</p>   | <p><b>Sample size:</b><br/>N=620</p> <p><b>Inclusion criteria:</b></p> <ul style="list-style-type: none"> <li>• Patients aged &gt;14 years#</li> </ul> <p><b>Exclusion criteria:</b></p> <ul style="list-style-type: none"> <li>• None</li> </ul> <p><b>Setting and population:</b></p> <ul style="list-style-type: none"> <li>• Records of 620 patients randomly selected from 63,820 patients assigned to 3 participating primary care centres in the province of Gipuzkoa, Spain between January 2012 to January 2013</li> </ul>                                        | <p><b>1. Factors associated with BMI recording:</b></p> <ul style="list-style-type: none"> <li>• Presence of comorbid conditions (such as diabetes mellitus, hypertension, hyperlipidaemia, coronary ischemia, congestive heart failure, stroke, sleep apnoea syndrome, peripheral venous insufficiency, and hypothyroidism)</li> </ul>                                                                                                                                    | <p>BMI recording</p>                   | <p><b>Statistical analysis:</b></p> <ul style="list-style-type: none"> <li>• Descriptive for proportions</li> <li>• Chi-square test or a Fisher's test to find association of the variable with the BMI recording (not relevant to calculated RR below).</li> </ul> <p><b>Results/effects estimates:</b></p> <p>Proportion of patients with an anthropometry measurement between January 2012 to January 2013:</p> <ul style="list-style-type: none"> <li>• 28% had weight recording</li> <li>• 27% had BMI recording</li> <li>• 0.2% had WC recording</li> <li>• 6% had obesity recording</li> </ul> <p>1. Factors associated with BMI recording:</p> <ul style="list-style-type: none"> <li>• Presence of comorbidity: Yes (Calculated RR*: 3.10, Ref No)</li> </ul> | <p><b>Author's conclusions:</b></p> <p>“This study confirmed that prevalence of obesity is underestimated, mainly because it is inadequately recorded in clinical histories; that prevalence increases in the presence of other risk factors; and that there is a significant variability in data collection between healthcare professionals.”</p> <p><b>Reviewer's comments:</b></p> <p>This study shows that presence of comorbidity is positively associated with BMI recording.</p> <p>This study has clearly met 4/8 (50%) criteria in the critical</p> |

|                                                                                                                                                                                     |                                                                                                                                                                                                                                                                                                                                                                                                                                                                                                                                          |                                                                                                                                                                                                                                                                                                                                          |                       |                                                                                                                                                                                                                                                                                                                                                                                                                                                                                                                                                                                                                                                                                                                                                                             |                                                                                                                                                                                                                                                                                                                                                                                                                                                                                                                                                                                                                                                                                                                 |
|-------------------------------------------------------------------------------------------------------------------------------------------------------------------------------------|------------------------------------------------------------------------------------------------------------------------------------------------------------------------------------------------------------------------------------------------------------------------------------------------------------------------------------------------------------------------------------------------------------------------------------------------------------------------------------------------------------------------------------------|------------------------------------------------------------------------------------------------------------------------------------------------------------------------------------------------------------------------------------------------------------------------------------------------------------------------------------------|-----------------------|-----------------------------------------------------------------------------------------------------------------------------------------------------------------------------------------------------------------------------------------------------------------------------------------------------------------------------------------------------------------------------------------------------------------------------------------------------------------------------------------------------------------------------------------------------------------------------------------------------------------------------------------------------------------------------------------------------------------------------------------------------------------------------|-----------------------------------------------------------------------------------------------------------------------------------------------------------------------------------------------------------------------------------------------------------------------------------------------------------------------------------------------------------------------------------------------------------------------------------------------------------------------------------------------------------------------------------------------------------------------------------------------------------------------------------------------------------------------------------------------------------------|
|                                                                                                                                                                                     |                                                                                                                                                                                                                                                                                                                                                                                                                                                                                                                                          |                                                                                                                                                                                                                                                                                                                                          |                       |                                                                                                                                                                                                                                                                                                                                                                                                                                                                                                                                                                                                                                                                                                                                                                             | appraisal tool. One of the criteria was unclear.                                                                                                                                                                                                                                                                                                                                                                                                                                                                                                                                                                                                                                                                |
| <p><b>Authors:</b><br/>Mattar et al. [75]</p> <p><b>Year published:</b><br/>2017</p> <p><b>Study design:</b><br/>Cross-sectional study</p> <p><b>Country:</b><br/>United states</p> | <p><b>Sample size:</b><br/>N= 3,868</p> <p><b>Inclusion criteria:</b></p> <ul style="list-style-type: none"> <li>Adults aged 18 years and older with two or more visits during the study window</li> </ul> <p><b>Exclusion criteria:</b></p> <ul style="list-style-type: none"> <li>Children and pregnant women</li> </ul> <p><b>Setting and population:</b></p> <ul style="list-style-type: none"> <li>Patient EMR gathered through routine care at the Wichita Falls Family Medicine Clinic during June 2012 and June 2015.</li> </ul> | <p><b>Factors associated with BMI documentation</b></p> <ul style="list-style-type: none"> <li>Age</li> <li>Sex</li> <li>Race</li> <li>Type of insurance</li> <li>BMI</li> <li>Morbid obesity (BMI <math>\geq</math> 40)</li> <li>Total number of comorbidities</li> </ul>                                                               | Obesity documentation | <p><b>Statistical analysis:</b></p> <ul style="list-style-type: none"> <li>Descriptive statistics for proportions</li> <li>Logistic regression to estimate OR for obesity documentation, adjusted for covariates.</li> </ul> <p><b>Results/effects estimates:</b><br/>Proportion of patients had obesity documented during June 2012 and June 2015:</p> <ul style="list-style-type: none"> <li>102 (35.3%) had their BMI calculated and documented</li> </ul> <p>1.Predictors of obesity documentation:</p> <ul style="list-style-type: none"> <li>Age (OR: 0.97) (continuous)</li> <li>Female 0.58 (OR: 0.58, Ref male)</li> <li>Morbid obesity (BMI <math>\geq</math> 40) (OR: 1.60, Ref BMI &lt; 40)</li> <li>Number of Comorbidities (OR: 1.33) (continuous)</li> </ul> | <p><b>Author's conclusions:</b><br/>"Based on EHR documentation, obesity is under coded and generally not identified as a significant problem in primary care. Physicians are more likely to document obesity in the patient record for those with higher BMI scores who are morbidly obese. Moreover, physicians more frequently provide exercise than diet counseling for the documented obese."</p> <p><b>Reviewer's comments:</b><br/>This study shows that decreasing age, male sex, morbid obesity BMI <math>\geq</math> 40, and number of comorbidities were positively associated with obesity documentation.</p> <p>This study has clearly met 8/8 (100%) criteria in the critical appraisal tool.</p> |
| <p><b>Authors:</b><br/>Melamed et al. [76]</p> <p><b>Year published:</b><br/>2009</p> <p><b>Study design:</b><br/>Cross-sectional study</p> <p><b>Country:</b><br/>Israel</p>       | <p><b>Sample size:</b><br/>N= 289</p> <p><b>Inclusion criteria:</b></p> <ul style="list-style-type: none"> <li>Patients scheduled to see a participating physician (at least 1-year tenure in the family practice and at least a year-long rapport with the patients)</li> <li>Patients who had medical insurance coverage by CHS</li> </ul> <p><b>Exclusion criteria:</b></p>                                                                                                                                                           | <p><b>Factors associated with BMI documentation</b></p> <ul style="list-style-type: none"> <li>Education level</li> <li>Residence</li> <li>Sex</li> <li>Smoking</li> <li>Physical activity</li> <li>Comorbidities</li> <li>Chronic medication use</li> <li>The number of medical encounters in the past 6 months</li> <li>BMI</li> </ul> | BMI documentation     | <p><b>Statistical analysis:</b></p> <ul style="list-style-type: none"> <li>Descriptive statistics for proportions</li> <li>Logistic regression to estimate OR for BMI documentation, adjusted for covariates.</li> </ul> <p><b>Results/effects estimates:</b><br/>Proportion of patients that had their BMI calculated and documented during January 2004 (n=289):</p> <ul style="list-style-type: none"> <li>102 (35.3%) had their BMI calculated and documented</li> </ul> <p>1.Predictors of BMI documentation:</p> <ul style="list-style-type: none"> <li>Age (<math>\geq</math> 55y OR: 2.77, Ref &lt; 55y)</li> <li>Obesity (BMI <math>\geq</math> 30.0kg/m<sup>2</sup>) (OR: 2.04, Ref no)</li> </ul>                                                                | <p><b>Author's conclusions:</b><br/>"Family physicians failed to identify most obese and overweight patients, as seen by lack of BMI documentation and concordant diagnoses in the medical problem list. Determination of BMI by physicians in family practice is of utmost importance, and its incorporation into medical care should be optimized."</p> <p><b>Reviewer's comments:</b></p>                                                                                                                                                                                                                                                                                                                    |

|                                                                                                                                                                                       |                                                                                                                                                                                                                                                                                                                                                                                                                                                                                                                                                                                                                                                                                                                                                                                                                                        |                                                                                                                                                                                                                                                                                                                                                                                                                                                                                                                                                                                                                                                                                                                                                                                        |                                           |                                                                                                                                                                                                                                                                                                                                                                                                                                                                                                                                                                                                                                                                                                                                                                                                                                                                                                                                                                                                                                                                                                                                                                                                                                                                                                                                                                                                                                                                                                                                                                                                                                                                                              |                                                                                                                                                                                                                                                                                                                                                                                                                                                                                                                                                                                                                                                                                                                                                   |
|---------------------------------------------------------------------------------------------------------------------------------------------------------------------------------------|----------------------------------------------------------------------------------------------------------------------------------------------------------------------------------------------------------------------------------------------------------------------------------------------------------------------------------------------------------------------------------------------------------------------------------------------------------------------------------------------------------------------------------------------------------------------------------------------------------------------------------------------------------------------------------------------------------------------------------------------------------------------------------------------------------------------------------------|----------------------------------------------------------------------------------------------------------------------------------------------------------------------------------------------------------------------------------------------------------------------------------------------------------------------------------------------------------------------------------------------------------------------------------------------------------------------------------------------------------------------------------------------------------------------------------------------------------------------------------------------------------------------------------------------------------------------------------------------------------------------------------------|-------------------------------------------|----------------------------------------------------------------------------------------------------------------------------------------------------------------------------------------------------------------------------------------------------------------------------------------------------------------------------------------------------------------------------------------------------------------------------------------------------------------------------------------------------------------------------------------------------------------------------------------------------------------------------------------------------------------------------------------------------------------------------------------------------------------------------------------------------------------------------------------------------------------------------------------------------------------------------------------------------------------------------------------------------------------------------------------------------------------------------------------------------------------------------------------------------------------------------------------------------------------------------------------------------------------------------------------------------------------------------------------------------------------------------------------------------------------------------------------------------------------------------------------------------------------------------------------------------------------------------------------------------------------------------------------------------------------------------------------------|---------------------------------------------------------------------------------------------------------------------------------------------------------------------------------------------------------------------------------------------------------------------------------------------------------------------------------------------------------------------------------------------------------------------------------------------------------------------------------------------------------------------------------------------------------------------------------------------------------------------------------------------------------------------------------------------------------------------------------------------------|
|                                                                                                                                                                                       | <ul style="list-style-type: none"> <li>Patients who were pregnant, younger than 18 years, or not fluent in Hebrew</li> </ul> <p><b>Setting and population:</b></p> <ul style="list-style-type: none"> <li>Records from 7 urban family practices of CHS in Israel affiliated with the Department of Family Medicine at Tel Aviv University during January 2004.</li> </ul>                                                                                                                                                                                                                                                                                                                                                                                                                                                              |                                                                                                                                                                                                                                                                                                                                                                                                                                                                                                                                                                                                                                                                                                                                                                                        |                                           | <ul style="list-style-type: none"> <li>Diabetes mellitus (OR: 4.35, Ref no)</li> <li>Hypertension (OR: 3.20, Ref no)</li> <li>Chronic medication use (OR: 3.44, Ref no)</li> </ul>                                                                                                                                                                                                                                                                                                                                                                                                                                                                                                                                                                                                                                                                                                                                                                                                                                                                                                                                                                                                                                                                                                                                                                                                                                                                                                                                                                                                                                                                                                           | <p>This study shows that older age (<math>\geq 55y</math>), having obesity, diabetes mellitus, hypertension, and chronic medication use were positively associated with BMI documentation.</p> <p>This study has clearly met 8/8 (100%) criteria in the critical appraisal tool.</p>                                                                                                                                                                                                                                                                                                                                                                                                                                                              |
| <p><b>Authors:</b><br/>Mocarski et al. [77]</p> <p><b>Year published:</b><br/>2018</p> <p><b>Study design:</b><br/>Cross-sectional study</p> <p><b>Country:</b><br/>United states</p> | <p><b>Sample size:</b><br/>N=5,512,285</p> <p><b>Inclusion criteria:</b></p> <ul style="list-style-type: none"> <li>Patients aged <math>\geq 20</math> years on index date and had available BMI measurement in the Quintiles EMR</li> <li>Patients had at least 3 months of follow-up data after the first recorded BMI</li> <li>Study group: ICD-9 coded patients with overweight and obesity</li> <li>Comparison group: non-coded patients</li> </ul> <p><b>Exclusion criteria:</b></p> <ul style="list-style-type: none"> <li>Pregnancy or gestational diabetes</li> </ul> <p><b>Setting and population:</b></p> <ul style="list-style-type: none"> <li>Records from 1300 sites and 49 states in United States from US primary care EHR database and the Quintile EMR database between 1 January 2014 and 30 June 2014.</li> </ul> | <p><b>Factors associated with receiving ICD-9 code for overweight or obesity:</b></p> <ul style="list-style-type: none"> <li>Age</li> <li>Sex</li> <li>Race</li> <li>CCI Category</li> <li>Comorbidities:</li> <li>Prader Willi Syndrome</li> <li>Metabolic Syndrome</li> <li>Sleep Apnea</li> <li>Prediabetes</li> <li>NAFLD</li> <li>Cushing Syndrome</li> <li>Vitamin D Deficiency</li> <li>Type 2 diabetes mellitus</li> <li>Hypertension</li> <li>Dyslipidemia</li> <li>Depression</li> <li>Gallbladder Disease</li> <li>Osteoarthritis</li> <li>Feeding Difficulties</li> <li>Dyspepsia</li> <li>Cardiovascular disease</li> <li>Chronic Kidney Disease</li> <li>Malignancy</li> <li>Acute/Chronic Pancreatitis</li> <li>Inflammatory Bowel Disease</li> <li>Anorexia</li> </ul> | <p>ICD-9 codes for overweight/obesity</p> | <p><b>Statistical analysis:</b></p> <ul style="list-style-type: none"> <li>Descriptive for proportions</li> <li>Logistic regression to estimate OR for being coded as with obesity and overweight as per ICD-9 code for overweight or obesity, adjusted for covariates</li> </ul> <p><b>Results/effects estimates:</b></p> <p>Proportions of patients who had ICD-9 codes for overweight or obesity between January 2014 and June 2014:</p> <ul style="list-style-type: none"> <li>15.1% of all patients (n = 833,763)</li> </ul> <p>1. Predictors of being coded for obesity in patients with BMI <math>\geq 30\text{kg/m}^2</math> (N=2,332,214)</p> <ul style="list-style-type: none"> <li>Age (20–44y OR: 1.94, 45–64y OR: 1.46, Ref <math>\geq 60y</math>)</li> <li>Sex: Female (OR: 1.34, Ref male)</li> <li>Race: (Asian OR: 0.99, Black OR: 1.44, Hispanic OR: 1.69, Native American OR: 2.17, Multi race OR: 1.80, other race OR: 1.05, Ref White)</li> <li>CCI Category: (1 OR: 1.23, 2 OR: 1.24, 3 OR: 1.42, 4 OR: 1.59, <math>\geq 5</math> OR: 1.71, Ref 0)</li> <li>Comorbidities (Prader Willi Syndrome OR: 2.25, metabolic syndrome OR: 2.19, sleep apnea OR: 2.16, prediabetes OR: 1.52, NAFLD OR: 1.52, Cushing syndrome OR: 1.37, vitamin D deficiency OR: 1.33, type 2 diabetes mellitus OR: 1.24, hypertension OR: 1.24, dyslipidemia OR: 1.21, depression OR: 1.23, gallbladder disease OR: 1.17, osteoarthritis OR: 1.08, cardiovascular disease OR: 0.93, chronic kidney disease OR: 0.91, malignancy OR: 0.87, acute/chronic pancreatitis OR: 0.81, inflammatory bowel disease OR: 0.74, anorexia OR: 0.74, HIV OR: 0.67, Ref 'no' for each comorbidity)</li> </ul> | <p><b>Author's conclusions:</b></p> <p>“US outpatients with overweight or obesity are not being reliably coded, making ICD-9 codes undependable sources for determining obesity prevalence and outcomes. BMI data available within EHR databases offer a more accurate and objective means of classifying overweight/obese status.”</p> <p><b>Reviewer's comments:</b></p> <p>This study shows younger age (20–44y and 45–64y), female sex, increasing CCI category, and a few comorbidities were positively associated while except cardiovascular disease, malignancy, acute/chronic pancreatitis, inflammatory bowel disease, anorexia, and HIV were negatively associated with identification of overweight or obesity using ICD-9 codes.</p> |

|                                                                                                                                                                               |                                                                                                                                                                                                                                                                                                                                                                                                                                                                                                                                                                                                                                                                                                                                                                                                                                                                                                       |                                                                                                                                                                                                                                                                                                                                                                                                                                                                                                                                                                                   |                |                                                                                                                                                                                                                                                                                                                                                                                                                                                                                                                                                                                                                                                                                                                                                                                                                                                                                                                                                                                                                                                                                                                                                                                                                                                                                                                                                                                                                                                                                                                                                                                                                                                                                                                                                                                                                                                                                                                                                                                                                                                             |                                                                                                                                                                                                                                                                                                                                                                                                                                                                                                                                                                                                                                                                                                                                                                                                                                                                                            |
|-------------------------------------------------------------------------------------------------------------------------------------------------------------------------------|-------------------------------------------------------------------------------------------------------------------------------------------------------------------------------------------------------------------------------------------------------------------------------------------------------------------------------------------------------------------------------------------------------------------------------------------------------------------------------------------------------------------------------------------------------------------------------------------------------------------------------------------------------------------------------------------------------------------------------------------------------------------------------------------------------------------------------------------------------------------------------------------------------|-----------------------------------------------------------------------------------------------------------------------------------------------------------------------------------------------------------------------------------------------------------------------------------------------------------------------------------------------------------------------------------------------------------------------------------------------------------------------------------------------------------------------------------------------------------------------------------|----------------|-------------------------------------------------------------------------------------------------------------------------------------------------------------------------------------------------------------------------------------------------------------------------------------------------------------------------------------------------------------------------------------------------------------------------------------------------------------------------------------------------------------------------------------------------------------------------------------------------------------------------------------------------------------------------------------------------------------------------------------------------------------------------------------------------------------------------------------------------------------------------------------------------------------------------------------------------------------------------------------------------------------------------------------------------------------------------------------------------------------------------------------------------------------------------------------------------------------------------------------------------------------------------------------------------------------------------------------------------------------------------------------------------------------------------------------------------------------------------------------------------------------------------------------------------------------------------------------------------------------------------------------------------------------------------------------------------------------------------------------------------------------------------------------------------------------------------------------------------------------------------------------------------------------------------------------------------------------------------------------------------------------------------------------------------------------|--------------------------------------------------------------------------------------------------------------------------------------------------------------------------------------------------------------------------------------------------------------------------------------------------------------------------------------------------------------------------------------------------------------------------------------------------------------------------------------------------------------------------------------------------------------------------------------------------------------------------------------------------------------------------------------------------------------------------------------------------------------------------------------------------------------------------------------------------------------------------------------------|
|                                                                                                                                                                               |                                                                                                                                                                                                                                                                                                                                                                                                                                                                                                                                                                                                                                                                                                                                                                                                                                                                                                       | <ul style="list-style-type: none"> <li>• HIV</li> <li>• Cachexia</li> </ul>                                                                                                                                                                                                                                                                                                                                                                                                                                                                                                       |                |                                                                                                                                                                                                                                                                                                                                                                                                                                                                                                                                                                                                                                                                                                                                                                                                                                                                                                                                                                                                                                                                                                                                                                                                                                                                                                                                                                                                                                                                                                                                                                                                                                                                                                                                                                                                                                                                                                                                                                                                                                                             | This study has clearly met 8/8 (100%) criteria in the critical appraisal tool.                                                                                                                                                                                                                                                                                                                                                                                                                                                                                                                                                                                                                                                                                                                                                                                                             |
| <p><b>Authors:</b><br/>Nicolson et al. [78]</p> <p><b>Year published:</b><br/>2019</p> <p><b>Study design:</b><br/>Cohort study</p> <p><b>Country:</b><br/>United Kingdom</p> | <p><b>Sample size:</b><br/>N=4,918,746</p> <p><b>Inclusion criteria:</b></p> <ul style="list-style-type: none"> <li>• Patients aged <math>\geq 18</math> years before or during the study period</li> <li>• <math>\geq 1</math> day of research quality registration (registration at a practice with continuous data reporting deemed fit)</li> <li>• <math>\geq 1</math> face-to-face consultation with an HCP</li> <li>• Eligible for linkage to the NCRAS cancer registry data, practice and patient level IMD data and ONS mortality data</li> </ul> <p><b>Exclusion criteria:</b><br/>None</p> <p><b>Setting and population:</b></p> <ul style="list-style-type: none"> <li>• Records from Clinical Practice Research Datalink GOLD database between 1 January 2000 and 31 December 2017, an ongoing primary care database of anonymised EHR data covering 6.9% of the UK population</li> </ul> | <p><b>1. Clinical encounter:</b></p> <ul style="list-style-type: none"> <li>• Clinical event</li> <li>• Staff role</li> </ul> <p><b>2. Factors associated with (a) any weight measurement and (b) repeat weight measurements:</b></p> <ul style="list-style-type: none"> <li>• Sex</li> <li>• Age</li> <li>• BMI</li> <li>• Socio-economic quintiles</li> <li>• Smoking status</li> <li>• Drinking status</li> <li>• Comorbidities</li> <li>• Ethnicity</li> <li>• Pregnancy, endocrine, digestive, and cardiovascular complaints</li> <li>• Frequency of consultation</li> </ul> | Weight records | <p><b>Statistical analysis:</b></p> <ul style="list-style-type: none"> <li>• Descriptive for proportions</li> <li>• Mixed effect negative binomial regression to estimate incident rate ratio (IRR) for a weight measurement and Cox models to estimate hazard ratios (HR) for repeat weight measurement, adjusted for covariates (list all in the sup table)</li> </ul> <p><b>Results/effects estimates:</b><br/>Proportion of patients with a weight recording between 1 January 2000 and 31 December 2017:</p> <ul style="list-style-type: none"> <li>• 68.6% had at least one recording</li> <li>• 49.2% had repeat measurement within a year</li> </ul> <p>1. Clinical factors:</p> <ul style="list-style-type: none"> <li>• Same day as a chronic disease review (16.4%)</li> <li>• Lifestyle advice (10.4%)</li> <li>• Contraception consultation (10.3%)</li> <li>• Health check (6.2%)</li> <li>• Medication review (6.1%)</li> <li>• Practice registration (2.1%)</li> </ul> <p>2 (a). Predictors of any weight measurement:</p> <ul style="list-style-type: none"> <li>• Sex: Female (IRR: 1.30, Ref male)</li> <li>• Age (80-89y IRR: 0.99, 60-69y IRR: 1.11, 30-39y IRR: 0.91, Ref 18-29y)</li> <li>• BMI (<math>&lt; 18.5</math> kg/m<sup>2</sup> IRR: 1.17, 25-29.99 kg/m<sup>2</sup> IRR: 1.12, 30-34.99 kg/m<sup>2</sup> IRR: 1.38, <math>&gt; 35</math> kg/m<sup>2</sup> IRR: 1.67, Ref 18.5-24.99 kg/m<sup>2</sup>)</li> <li>• Socio-economic quintiles: IMD Quintile (II IRR: 1.03, III IRR: 1.08, IV IRR: 1.17, V IRR: 1.22, Ref IMD Quintile I)</li> <li>• Number of comorbidities (1 IRR: 1.13, 2 IRR: 1.35, 3 IRR: 1.52, 4 IRR: 1.67, 5 IRR: 1.82, Ref 0 comorbidity)</li> <li>• Ethnic groups (Indian IRR: 1.25, African IRR: 1.24, Ref White)</li> </ul> <p>2 (b). Predictors of repeat weight measurement:</p> <ul style="list-style-type: none"> <li>• Sex: Female (HR 1.30, Ref male)</li> <li>• Ex-smoker (HR 1.09, Ref non-smoker)</li> <li>• Age (80-89y HR: 1.21, 60-69y HR: 1.34, 30-39y HR: 0.90, Ref 18-29y)</li> </ul> | <p><b>Author's conclusions:</b><br/>"Weight recording is not a routine activity in UK primary care. It is recorded for around a third of patients each year and is repeated on average every 2 years for these patients. It is more common in females with higher BMI and in those with comorbidity. Incentive payments and their removal appear to be associated with increases and decreases in weight recording."</p> <p><b>Reviewer's comments:</b><br/>This study shows that several socio demographics (older age, female sex, ethnic minorities, and increasing socio-economic deprivation), behavioural (former smoking), pregnancy, and increasing number of chronic medical conditions were positively associated with one or more weight recordings.</p> <p>This study has clearly met 7/10 (70%) criteria in the critical appraisal tool. Two of the criteria was unclear.</p> |

|                                                                                                                                                                             |                                                                                                                                                                                                                                                                                                                                                                                                                                                                                                                                                                                                                                                                                                                                                                                                                                                                                                      |                                                                                                                                           |                   |                                                                                                                                                                                                                                                                                                                                                                                                                                                                                                                                                                                                                                                                                                                                                                                                                                                                                        |                                                                                                                                                                                                                                                                                                                                                                                                                                                                                                                                                                                                                                                                           |
|-----------------------------------------------------------------------------------------------------------------------------------------------------------------------------|------------------------------------------------------------------------------------------------------------------------------------------------------------------------------------------------------------------------------------------------------------------------------------------------------------------------------------------------------------------------------------------------------------------------------------------------------------------------------------------------------------------------------------------------------------------------------------------------------------------------------------------------------------------------------------------------------------------------------------------------------------------------------------------------------------------------------------------------------------------------------------------------------|-------------------------------------------------------------------------------------------------------------------------------------------|-------------------|----------------------------------------------------------------------------------------------------------------------------------------------------------------------------------------------------------------------------------------------------------------------------------------------------------------------------------------------------------------------------------------------------------------------------------------------------------------------------------------------------------------------------------------------------------------------------------------------------------------------------------------------------------------------------------------------------------------------------------------------------------------------------------------------------------------------------------------------------------------------------------------|---------------------------------------------------------------------------------------------------------------------------------------------------------------------------------------------------------------------------------------------------------------------------------------------------------------------------------------------------------------------------------------------------------------------------------------------------------------------------------------------------------------------------------------------------------------------------------------------------------------------------------------------------------------------------|
|                                                                                                                                                                             |                                                                                                                                                                                                                                                                                                                                                                                                                                                                                                                                                                                                                                                                                                                                                                                                                                                                                                      |                                                                                                                                           |                   | <ul style="list-style-type: none"> <li>BMI (&lt;18.5 kg/m<sup>2</sup> HR: 1.22, 25-29.99 kg/m<sup>2</sup> HR: 1.11, 30-34.99 kg/m<sup>2</sup> HR: 1.36, &gt;35 kg/m<sup>2</sup> HR: 1.69, Ref 18.5-24.99 kg/m<sup>2</sup>)</li> <li>Socio-economic quintiles: IMD Quintile (II HR: 1.03, III HR: 1.05, IV HR: 1.10, V HR: 1.16, Unknown HR:0.94, Ref IMD Quintile I)</li> <li>Number of comorbidities (1 HR: 1.27, 2 HR: 1.46, 3 HR: 1.60, 4 HR 1.71, 5 HR: 1.85, Ref 0 comorbidity)</li> </ul>                                                                                                                                                                                                                                                                                                                                                                                        |                                                                                                                                                                                                                                                                                                                                                                                                                                                                                                                                                                                                                                                                           |
| <p><b>Authors:</b><br/>Osborn et al. [79]</p> <p><b>Year published:</b><br/>2011</p> <p><b>Study design:</b><br/>Cohort study</p> <p><b>Country:</b><br/>United Kingdom</p> | <p><b>Sample size:</b><br/>N=18,696 (with SMI) and 95,512 (without SMI)</p> <p><b>Inclusion criteria:</b></p> <ul style="list-style-type: none"> <li>Patients aged ≥18 years before or during the study period with at least 6 months of follow up data</li> <li>Study group: patients who had SMI diagnosis based on the READ code list</li> <li>Comparison group: patients who did not have a SMI diagnosis</li> </ul> <p><b>Exclusion criteria:</b></p> <ul style="list-style-type: none"> <li>Patients with pre-existing CVD and patients who registered but had no further record of attendance at the practice</li> </ul> <p><b>Setting and population:</b></p> <ul style="list-style-type: none"> <li>Records from practices which had reached pre-defined THIN Quality Standard contributing to the primary care databases THIN in the UK, between January 2000 and December 2007</li> </ul> | <p><b>1. Factors associated with screening of BMI:</b></p> <ul style="list-style-type: none"> <li>Presence of SMI</li> <li>Age</li> </ul> | Screened for BMI  | <p><b>Statistical analysis:</b></p> <ul style="list-style-type: none"> <li>Descriptive for proportions</li> <li>Poisson regression to estimate IRR for BMI recording, adjusted for screened for BMI by age 18-59y and ≥60y subgroups</li> </ul> <p><b>Results/effects estimates:</b></p> <p>Proportion of SMI patients who were screened for BMI:</p> <ul style="list-style-type: none"> <li>13.6% in 2000, 14.9% in 2001, 16.1% in 2002, 18.6% in 2003, 24.0% in 2004, 26.1% in 2005, 32.9% in 2006 and 36.9% in 2007</li> </ul> <p>1. Predictors associated with screening of BMI in patients with SMI in comparison to patients without SMI:</p> <ul style="list-style-type: none"> <li>People aged 18-59y (IRR: 0.599 in 2000, 0.615 in 2003 and 0.793 in 2005)</li> <li>People aged 60y and above (IRR: 0.571 in 2000, 0.533 in 2003, 0.657 in 2005 and 0.808 in 2007)</li> </ul> | <p><b>Author's conclusions:</b></p> <p>“In UK primary care, people with SMI over 60 years of age remain less likely than the general population to receive annual CVD screening despite higher risk of developing CVD.”</p> <p><b>Reviewer's comments:</b></p> <p>This study shows having SMI in age group 18-59 years is negatively associated with BMI screening until 2005, however, they were equally likely to be screened in 2007. However, patients with SMI who were aged 60 years and above were less likely to have a BMI screening.</p> <p>This study has clearly met 8/10 (80%) criteria in the critical appraisal tool. One of the criteria was unclear.</p> |
| <p><b>Authors:</b><br/>Rose et al. [80]</p>                                                                                                                                 | <p><b>Sample size:</b><br/>N= 79,947</p> <p><b>Inclusion criteria:</b></p>                                                                                                                                                                                                                                                                                                                                                                                                                                                                                                                                                                                                                                                                                                                                                                                                                           | <p><b>1. Factors associated with BMI Documentation:</b></p> <ul style="list-style-type: none"> <li>Sex</li> <li>Race</li> </ul>           | BMI Documentation | <p><b>Statistical analysis:</b></p> <ul style="list-style-type: none"> <li>Descriptive for proportions</li> <li>Chi-square to test association between the variables and the BMI documentation (not relevant to calculated RR below).</li> </ul>                                                                                                                                                                                                                                                                                                                                                                                                                                                                                                                                                                                                                                       | <p><b>Author's conclusions:</b></p> <p>“In a large primary care network BMI documentation has been incomplete and for</p>                                                                                                                                                                                                                                                                                                                                                                                                                                                                                                                                                 |



|                                                                                                                                                                                    |                                                                                                                                                                                                                                                                                                                                                                                                                                                                                                                                                                                                                                                                                                                                                                                 |                                                                                                                                                                                                                                                                                                                                                                                |                                                 |                                                                                                                                                                                                                                                                                                                                                                                                                                                                                                                                                                                                                                                                                                                                                                                                    |                                                                                                                                                                                                                                                                                                                                                                                                                                                                       |
|------------------------------------------------------------------------------------------------------------------------------------------------------------------------------------|---------------------------------------------------------------------------------------------------------------------------------------------------------------------------------------------------------------------------------------------------------------------------------------------------------------------------------------------------------------------------------------------------------------------------------------------------------------------------------------------------------------------------------------------------------------------------------------------------------------------------------------------------------------------------------------------------------------------------------------------------------------------------------|--------------------------------------------------------------------------------------------------------------------------------------------------------------------------------------------------------------------------------------------------------------------------------------------------------------------------------------------------------------------------------|-------------------------------------------------|----------------------------------------------------------------------------------------------------------------------------------------------------------------------------------------------------------------------------------------------------------------------------------------------------------------------------------------------------------------------------------------------------------------------------------------------------------------------------------------------------------------------------------------------------------------------------------------------------------------------------------------------------------------------------------------------------------------------------------------------------------------------------------------------------|-----------------------------------------------------------------------------------------------------------------------------------------------------------------------------------------------------------------------------------------------------------------------------------------------------------------------------------------------------------------------------------------------------------------------------------------------------------------------|
| <p><b>Year published:</b><br/>2009</p> <p><b>Study design:</b><br/>Cross-sectional study</p> <p><b>Country:</b><br/>United States</p>                                              | <ul style="list-style-type: none"> <li>• Patients aged <math>\geq 18</math> years before or during the study period</li> <li>• Patient who had at least two clinic visits billed to their PCP during study period</li> </ul> <p><b>Exclusion criteria:</b></p> <ul style="list-style-type: none"> <li>• Patients with who had a height greater than or equal to 2.13 meters, weight <math>&lt; 31.8</math> or <math>&gt; 453.6</math> kg, systolic BP <math>&lt; 50</math> or <math>&gt; 260</math> mmHg, or diastolic BP <math>&lt; 30</math> or <math>&gt; 150</math> mmHg.</li> </ul> <p><b>Setting and population:</b><br/>Records from Massachusetts General Hospital Primary Care Practice Based Research Network in the US, between July 2005 to December 2006</p>       | <ul style="list-style-type: none"> <li>• Commercial Insurance or Medicare</li> <li>• History of CVD</li> <li>• History of diabetes</li> <li>• History of hypertension</li> <li>• History of dyslipidemia</li> </ul>                                                                                                                                                            |                                                 | <p><b>Results/effects estimates:</b><br/>Proportion of patients with BMI documentation between July 2005 to December 2006:</p> <ul style="list-style-type: none"> <li>• 60.5% had weight and height recording</li> </ul> <p>1. Factors associated with BMI documentation:</p> <ul style="list-style-type: none"> <li>• Female (Calculated RR*: 1.27 Ref male)</li> <li>• Race (Non-White Calculated RR*: 1.05, Ref White)</li> <li>• History of CVD: Yes (Calculated RR*: 0.98 Ref No)</li> <li>• History of diabetes: Yes (Calculated RR*: 1.05, Ref No)</li> <li>• History of hypertension: Yes (Calculated RR*: 0.99 Ref No)</li> <li>• History of dyslipidemia: Yes (Calculated RR*: 0.98, Ref No)</li> </ul>                                                                                  | <p>patients with BMI measured, risk factor control has been poorer in obese patients compared with NW, even in those with obesity and CVD or diabetes. Better knowledge of BMI could provide an opportunity for improved quality in obesity care.”</p> <p><b>Reviewer’s comments:</b><br/>This study shows female sex, Hispanic and black race, having commercial insurance or medicare and history of diabetes is positively associated in BMI documentation.</p>    |
| <p><b>Authors:</b><br/>Ruser et al. [81]</p> <p><b>Year published:</b><br/>2005</p> <p><b>Study design:</b><br/>Cross-sectional study</p> <p><b>Country:</b><br/>United States</p> | <p><b>Sample size:</b><br/>N= 424</p> <p><b>Inclusion criteria:</b></p> <ul style="list-style-type: none"> <li>• Patient who had at least 1 primary care visit during study period</li> <li>• Patients classified with overweight (BMI <math>\geq 25</math> kg/m<sup>2</sup>) or obesity (BMI <math>\geq 30</math> kg/m<sup>2</sup>)</li> </ul> <p><b>Exclusion criteria:</b></p> <ul style="list-style-type: none"> <li>• Patients were excluded if they were born before 1938,</li> <li>• Patients were not classified with overweight nor obesity (BMI <math>&lt; 25</math> kg/m<sup>2</sup>),</li> <li>• Patient who had a life expectancy <math>&lt; 6</math> months</li> <li>• Patients with no routine visits with primary clinician during the study period.</li> </ul> | <p><b>Factors associated with Identification or management of overweight and obesity:</b></p> <ul style="list-style-type: none"> <li>• Age</li> <li>• Race</li> <li>• Sex</li> <li>• Height</li> <li>• Weight</li> <li>• Co-morbidities</li> <li>• Smoking</li> <li>• Alcohol use <math>&gt; 2</math> drinks/day for men or <math>&gt; 1</math> drink/day for women</li> </ul> | <p>Identification of overweight and obesity</p> | <p><b>Statistical analysis:</b></p> <ul style="list-style-type: none"> <li>• Descriptive statistics for proportions</li> <li>• Logistic regression to estimate OR for identification of overweight and obesity, adjusted for covariates</li> </ul> <p><b>Results/effects estimates:</b><br/>Proportions of patients who had ICD-9 codes for overweight or obesity:</p> <ul style="list-style-type: none"> <li>• 13 of 178 (7.3%) patients classified with overweight in overweight group or 76 of 246 (30.9%) patients classified with obesity in obesity group.</li> </ul> <p>1. Predictors of Identification of overweight and obesity</p> <ul style="list-style-type: none"> <li>• BMI category (BMI <math>\geq 30</math>kg/m<sup>2</sup> OR: 7.51, Ref BMI 25–29.9kg/m<sup>2</sup>)</li> </ul> | <p><b>Author’s conclusions:</b><br/>“Our results suggest that Internal Medicine residents markedly underrecognize and undertreat overweight and obesity.”</p> <p><b>Reviewer’s comments:</b><br/>This study shows having a BMI <math>\geq 30</math>kg/m<sup>2</sup> is positively associated with identification of overweight and obesity.</p> <p>This study has clearly met 6/8 (75%) criteria in the critical appraisal tool. Two of the criteria was unclear.</p> |

|                                                                                                                                                                                              |                                                                                                                                                                                                                                                                                                                                                                                                                                                                                                                                                                                                                                                                            |                                                                                                                                                                                                                                                                                                                                                                                                                                                                                                                 |                   |                                                                                                                                                                                                                                                                                                                                                                                                                                                                                                                                                                                                                                                                                                                                                                                                                                                                                                                                                                                                                                                                                                                                                                                                                                                                                                                                                                                 |                                                                                                                                                                                                                                                                                                                                                                                                                                                                                                                                                                                                                                                                                     |
|----------------------------------------------------------------------------------------------------------------------------------------------------------------------------------------------|----------------------------------------------------------------------------------------------------------------------------------------------------------------------------------------------------------------------------------------------------------------------------------------------------------------------------------------------------------------------------------------------------------------------------------------------------------------------------------------------------------------------------------------------------------------------------------------------------------------------------------------------------------------------------|-----------------------------------------------------------------------------------------------------------------------------------------------------------------------------------------------------------------------------------------------------------------------------------------------------------------------------------------------------------------------------------------------------------------------------------------------------------------------------------------------------------------|-------------------|---------------------------------------------------------------------------------------------------------------------------------------------------------------------------------------------------------------------------------------------------------------------------------------------------------------------------------------------------------------------------------------------------------------------------------------------------------------------------------------------------------------------------------------------------------------------------------------------------------------------------------------------------------------------------------------------------------------------------------------------------------------------------------------------------------------------------------------------------------------------------------------------------------------------------------------------------------------------------------------------------------------------------------------------------------------------------------------------------------------------------------------------------------------------------------------------------------------------------------------------------------------------------------------------------------------------------------------------------------------------------------|-------------------------------------------------------------------------------------------------------------------------------------------------------------------------------------------------------------------------------------------------------------------------------------------------------------------------------------------------------------------------------------------------------------------------------------------------------------------------------------------------------------------------------------------------------------------------------------------------------------------------------------------------------------------------------------|
|                                                                                                                                                                                              | <p><b>Setting and population:</b></p> <ul style="list-style-type: none"> <li>Records of 2 resident clinics of the Yale Internal Medicine Residency Programs (the Family Health Center, St. Mary's Hospital, Waterbury, Conn and the VA Connecticut Healthcare System Primary Care Clinic, West Haven, Conn) between 1 September 2001 and 31 July 2002.</li> </ul>                                                                                                                                                                                                                                                                                                          |                                                                                                                                                                                                                                                                                                                                                                                                                                                                                                                 |                   |                                                                                                                                                                                                                                                                                                                                                                                                                                                                                                                                                                                                                                                                                                                                                                                                                                                                                                                                                                                                                                                                                                                                                                                                                                                                                                                                                                                 |                                                                                                                                                                                                                                                                                                                                                                                                                                                                                                                                                                                                                                                                                     |
| <p><b>Authors:</b><br/>Turner, Harris &amp; Mazza [82]</p> <p><b>Year published:</b><br/>2015</p> <p><b>Study design:</b><br/>Cross sectional study</p> <p><b>Country:</b><br/>Australia</p> | <p><b>Sample size:</b><br/>N=270,426</p> <p><b>Inclusion criteria:</b></p> <ul style="list-style-type: none"> <li>Patients aged <math>\geq 18</math> years before or during the study period</li> <li>Patients who had visited the same practice more than three times in the previous 2 years</li> </ul> <p><b>Exclusion criteria:</b><br/>None</p> <p><b>Setting and population:</b></p> <ul style="list-style-type: none"> <li>Records from Melbourne East Monash General Practice Database (MAGNET), a primary care database of 78 participating general practice clinics in the inner-eastern region of Melbourne between 1 July 2011 and 31 December 2013</li> </ul> | <p><b>1. Factors associated with BMI documentation:</b></p> <ul style="list-style-type: none"> <li>Age</li> <li>Sex</li> <li>Number of diagnoses recorded</li> <li>Specific diagnosis recorded: hypertension, hyperlipidaemia, musculoskeletal problems, depression and anxiety, diabetes, cardiovascular disease, stroke, and kidney disease</li> <li>Prescription of medication related to diabetes, depression and anxiety, blood pressure and cardiovascular disease, lipids, and anticoagulants</li> </ul> | BMI documentation | <p><b>Statistical analysis:</b></p> <ul style="list-style-type: none"> <li>Descriptive for proportions</li> <li>Logistic regression to estimate odd's ratio (OR) for documentation of BMI, adjusted for covariates</li> </ul> <p><b>Results/effects estimates:</b><br/>Proportion of patients with an anthropometric measurement recording between 1 July 2011 and 31 December 2013:</p> <ul style="list-style-type: none"> <li>36.9% had height records</li> <li>25.8% had weight records</li> <li>4.3% had WC records</li> <li>22.2% had BMI documented</li> </ul> <p>1. Predictors of BMI documentation:</p> <ul style="list-style-type: none"> <li>Age (<math>\geq 75</math>y OR: 1.60, 65-74y OR: 1.20, 45-64y OR: 1.31, Ref 19-44y)</li> <li>Sex: Female (OR: 0.86, Ref male)</li> <li>Number of diagnosis recorded (1 OR: 1.25, 2 OR: 1.45, <math>\geq 3</math> OR: 1.69, Ref 0 comorbidity)</li> <li>Specific diagnosis recorded (hypertension OR: 1.18, hyperlipidaemia OR: 1.26, musculoskeletal problems OR: 1.07, depression and anxiety OR: 0.94, diabetes OR: 1.85, cardiovascular disease OR: 0.91, stroke OR: 0.87, Ref 'no' for each diagnosis)</li> <li>Prescription of medication related to specific diagnosis (blood pressure/cardiovascular disease OR: 1.07, depression and anxiety OR: 1.07, diabetes OR: 1.24, Ref 'no' for each diagnosis)</li> </ul> | <p><b>Author's conclusions:</b><br/>"Recording of measures of obesity in general practice is currently not consistent with guideline recommendations. Strategies to support general practitioners may improve their documentation of measures of obesity."</p> <p><b>Reviewer's comments:</b><br/>This study shows that socio demographics (older age and male sex), increasing number of chronic medical conditions, diagnosis of chronic medical conditions, and medications for CVD or blood pressure, diabetes, depression/anxiety were positively associated with BMI documentation.</p> <p>This study has clearly met 8/8 (100%) criteria in the critical appraisal tool.</p> |
| <b>Authors:</b>                                                                                                                                                                              | <b>Sample size:</b><br>N=3,446                                                                                                                                                                                                                                                                                                                                                                                                                                                                                                                                                                                                                                             | <b>1. Factors associated with weight measurement:</b>                                                                                                                                                                                                                                                                                                                                                                                                                                                           | Weight records    | <b>Statistical analysis:</b><br>• Descriptive for proportions                                                                                                                                                                                                                                                                                                                                                                                                                                                                                                                                                                                                                                                                                                                                                                                                                                                                                                                                                                                                                                                                                                                                                                                                                                                                                                                   | <b>Author's conclusions:</b>                                                                                                                                                                                                                                                                                                                                                                                                                                                                                                                                                                                                                                                        |

|                                                                                                                                                     |                                                                                                                                                                                                                                                                                                                                                                                                                                                                                                                                                                                                                                                                                                                                                                                                                                                                                                                                                                                                                                                      |                                                                                                                                                                                                                                                                                                                        |                                                     |                                                                                                                                                                                                                                                                                                                                                                                                                                                                                                                                                                                                                                                                                                                                                                                                                                                                                                                                                                                                                                                              |                                                                                                                                                                                                                                                                                                                                                                                                                                                                                                                                                                                                                                                                                                                                                                                                                                                                                                                                                                                                                   |
|-----------------------------------------------------------------------------------------------------------------------------------------------------|------------------------------------------------------------------------------------------------------------------------------------------------------------------------------------------------------------------------------------------------------------------------------------------------------------------------------------------------------------------------------------------------------------------------------------------------------------------------------------------------------------------------------------------------------------------------------------------------------------------------------------------------------------------------------------------------------------------------------------------------------------------------------------------------------------------------------------------------------------------------------------------------------------------------------------------------------------------------------------------------------------------------------------------------------|------------------------------------------------------------------------------------------------------------------------------------------------------------------------------------------------------------------------------------------------------------------------------------------------------------------------|-----------------------------------------------------|--------------------------------------------------------------------------------------------------------------------------------------------------------------------------------------------------------------------------------------------------------------------------------------------------------------------------------------------------------------------------------------------------------------------------------------------------------------------------------------------------------------------------------------------------------------------------------------------------------------------------------------------------------------------------------------------------------------------------------------------------------------------------------------------------------------------------------------------------------------------------------------------------------------------------------------------------------------------------------------------------------------------------------------------------------------|-------------------------------------------------------------------------------------------------------------------------------------------------------------------------------------------------------------------------------------------------------------------------------------------------------------------------------------------------------------------------------------------------------------------------------------------------------------------------------------------------------------------------------------------------------------------------------------------------------------------------------------------------------------------------------------------------------------------------------------------------------------------------------------------------------------------------------------------------------------------------------------------------------------------------------------------------------------------------------------------------------------------|
| <p>Verberne et al. [83]</p> <p><b>Year published:</b> 2018</p> <p><b>Study design:</b> Cross sectional study</p> <p><b>Country:</b> Netherlands</p> | <p><b>Inclusion criteria:</b></p> <ul style="list-style-type: none"> <li>• Patients born between 1945-1981 and registered in one of the participating general practices in NIVEL Primary Care Database</li> </ul> <p><b>Exclusion criteria:</b></p> <ul style="list-style-type: none"> <li>• Patients having incomplete registration in general practice</li> <li>• Patients with missing data on height and/or weight in the baseline questionnaire of the AMIGO study</li> <li>• Patients not having consultation with their GP in 2012</li> <li>• Patients having self-reported BMI &lt; 25 kg/m<sup>2</sup></li> <li>• Patients from general practices having poor data quality or unavailability of data</li> </ul> <p><b>Setting and population:</b></p> <ul style="list-style-type: none"> <li>• Records from NIVEL Primary Care Database combined with records from AMIGO study</li> <li>• Participants for this study were recruited through 99 general practices that participated in the NIVEL-PCD in April 2011 and July 2012</li> </ul> | <ul style="list-style-type: none"> <li>• Sex</li> <li>• Age</li> <li>• Educational level</li> <li>• BMI</li> <li>• Smoking status</li> <li>• Drinking status</li> <li>• Absence or presence of chronic condition</li> <li>• Presence of cardiovascular disorder, osteoarthritis, diabetes mellitus and COPD</li> </ul> |                                                     | <ul style="list-style-type: none"> <li>• Multiple logistic multilevel regression to estimate OR for weight record, adjusted for covariates (Model 2)</li> </ul> <p><b>Results/effects estimates:</b></p> <p>Proportion of patients with an anthropometric measurement:</p> <ul style="list-style-type: none"> <li>• 23% had BMI recordings (height and weight) in 2012</li> <li>• 58% had at least one weight recording from 2012 to 2015</li> </ul> <p>1 Predictors of weight recording:</p> <ul style="list-style-type: none"> <li>• Age (61-67y OR: 2.53, 51-60y OR: 2.26, 41-50y OR: 1.81, Ref 31-40y)</li> <li>• Educational Level (high OR: 0.70, intermediate OR: 0.83, Ref low)</li> <li>• BMI category: <math>\geq 30</math> kg/m<sup>2</sup> (OR: 1.25, Ref <math>\geq 25</math> and <math>&lt; 30</math> kg/m<sup>2</sup>)</li> <li>• Chronic condition: 'no' (OR: 0.39, Ref 'yes')</li> <li>• Specific diagnosis recorded (cardiovascular disorder OR: 3.16, diabetes mellitus OR: 10.27, COPD OR: 2.00, Ref 'no' for each diagnosis)</li> </ul> | <p>“Weight was frequently recorded for overweight patients with a chronic condition, for whom regular weight measurement is recommended in clinical guidelines, and for which weight recording is a performance indicator as part of the payment system. For younger patients and those without a chronic condition related to being overweight, weight was less frequently recorded. For these patients, routine recording of weight in EHRs deserves more attention, with the aim to support early recognition and treatment of overweight.”</p> <p><b>Reviewer’s comments:</b></p> <p>This study shows that socio demographics (older age and low educational level), having BMI <math>\geq 30</math> kg/m<sup>2</sup>, presence of chronic medical conditions and diagnosis of specific medical conditions (cardiovascular disorder, diabetes mellitus and COPD) were positively associated with weight recordings.</p> <p>This study has clearly met 8/8 (100%) criteria in the critical appraisal tool.</p> |
| <p><b>Authors:</b> Yoong et al. [84]</p>                                                                                                            | <p><b>Sample size:</b> N=1,111</p> <p><b>Inclusion criteria:</b></p>                                                                                                                                                                                                                                                                                                                                                                                                                                                                                                                                                                                                                                                                                                                                                                                                                                                                                                                                                                                 | <p><b>1. Factors associated with non-identification of overweight and obesity:</b></p> <ul style="list-style-type: none"> <li>• BMI</li> </ul>                                                                                                                                                                         | <p>Non-identification of overweight and obesity</p> | <p><b>Statistical analysis:</b></p> <ul style="list-style-type: none"> <li>• Descriptive for proportions</li> <li>• Multiple logistic regression to estimate OR for non-identification of overweight and obesity for covariates</li> </ul>                                                                                                                                                                                                                                                                                                                                                                                                                                                                                                                                                                                                                                                                                                                                                                                                                   | <p><b>Author’s conclusions:</b></p> <p>“GPs missed identifying a substantial proportion of overweight and obese patients.</p>                                                                                                                                                                                                                                                                                                                                                                                                                                                                                                                                                                                                                                                                                                                                                                                                                                                                                     |

|                                                                                                                                                                                                                                                                                                                                                                                                                                                                                                                                                                                                                                                                                                                                                                                                                                                                                                                                                                                                                                                                                                                                                                                                                                                                                                                                                                                                                                                                                                                                                                                                                                                                                                                                                                                                                                                                                                                                                                                                                                                                                                                                                                                                                                                                                                                                                                                                                                                         |                                                                                                                                                                                                                                                                                                                                                                                                                                                                                                                        |                                                                                                                                                                                                                                                                                                                                                         |  |                                                                                                                                                                                                                                                                                                                                                                                                                                                                                                                                                                                                                                                                                         |                                                                                                                                                                                                                                                                                                                                                                                                                                                                                                                                                                 |
|---------------------------------------------------------------------------------------------------------------------------------------------------------------------------------------------------------------------------------------------------------------------------------------------------------------------------------------------------------------------------------------------------------------------------------------------------------------------------------------------------------------------------------------------------------------------------------------------------------------------------------------------------------------------------------------------------------------------------------------------------------------------------------------------------------------------------------------------------------------------------------------------------------------------------------------------------------------------------------------------------------------------------------------------------------------------------------------------------------------------------------------------------------------------------------------------------------------------------------------------------------------------------------------------------------------------------------------------------------------------------------------------------------------------------------------------------------------------------------------------------------------------------------------------------------------------------------------------------------------------------------------------------------------------------------------------------------------------------------------------------------------------------------------------------------------------------------------------------------------------------------------------------------------------------------------------------------------------------------------------------------------------------------------------------------------------------------------------------------------------------------------------------------------------------------------------------------------------------------------------------------------------------------------------------------------------------------------------------------------------------------------------------------------------------------------------------------|------------------------------------------------------------------------------------------------------------------------------------------------------------------------------------------------------------------------------------------------------------------------------------------------------------------------------------------------------------------------------------------------------------------------------------------------------------------------------------------------------------------------|---------------------------------------------------------------------------------------------------------------------------------------------------------------------------------------------------------------------------------------------------------------------------------------------------------------------------------------------------------|--|-----------------------------------------------------------------------------------------------------------------------------------------------------------------------------------------------------------------------------------------------------------------------------------------------------------------------------------------------------------------------------------------------------------------------------------------------------------------------------------------------------------------------------------------------------------------------------------------------------------------------------------------------------------------------------------------|-----------------------------------------------------------------------------------------------------------------------------------------------------------------------------------------------------------------------------------------------------------------------------------------------------------------------------------------------------------------------------------------------------------------------------------------------------------------------------------------------------------------------------------------------------------------|
| <p><b>Year published:</b><br/>2014</p> <p><b>Study design:</b><br/>Cross sectional study</p> <p><b>Country:</b><br/>Australia</p>                                                                                                                                                                                                                                                                                                                                                                                                                                                                                                                                                                                                                                                                                                                                                                                                                                                                                                                                                                                                                                                                                                                                                                                                                                                                                                                                                                                                                                                                                                                                                                                                                                                                                                                                                                                                                                                                                                                                                                                                                                                                                                                                                                                                                                                                                                                       | <ul style="list-style-type: none"> <li>• Patients aged ≥18 years proving informed consent</li> <li>• Patients who completed touchscreen computer questionnaire</li> </ul> <p><b>Exclusion criteria:</b></p> <ul style="list-style-type: none"> <li>• None</li> </ul> <p><b>Setting and population:</b></p> <ul style="list-style-type: none"> <li>• Records of patients from 12 general practices randomly invited and consented to participate in the study in three urban cities in two Australian states</li> </ul> | <ul style="list-style-type: none"> <li>• Age</li> <li>• Sex</li> <li>• Presence of heart disease</li> <li>• Presence of high blood pressure</li> <li>• Presence of cholesterol</li> <li>• Presence of type 2 diabetes</li> <li>• Ethnicity</li> <li>• Had private health insurance</li> <li>• Frequency of consultation</li> <li>• Education</li> </ul> |  | <p><b>Results/effects estimates:</b><br/>Proportion of patients with an identification of obesity and overweight at study time:</p> <ul style="list-style-type: none"> <li>• 42% as overweight</li> <li>• 46% as having obesity</li> </ul> <p>1. Predictors of non-identification of overweight and obesity (subsample N=589):</p> <ul style="list-style-type: none"> <li>• BMI: obesity (OR: 0.1, Ref overweight)</li> <li>• Sex: male (OR: 1.7, Ref female)</li> <li>• Presence of high blood pressure: no (OR: 1.8, Ref yes)</li> <li>• Presence of type 2 diabetes: no (OR: 2.4, Ref yes)</li> <li>• Education: trade qualification/diploma (OR: 0.3, Ref HSC and below)</li> </ul> | <p>Strategies to support GPs in identifying their overweight or obese patients need to be implemented.”</p> <p><b>Reviewer’s comments:</b><br/>This study shows being male, absence of high blood pressure and type 2 diabetes are positively associated with non-identification of overweight and obesity. Whereas, having obesity and higher education are negatively associated with non-identification of overweight and obesity.</p> <p>This study has clearly met 7/8 (88%) criteria in the critical appraisal tool. One of the criteria was unclear.</p> |
| <p><b>Notes:</b><br/>Only significant predictors or those included in meta-analysis were reported in the results section of this table. The statistical significance was confirmed using a significance level of at 5% (p=0.05 or less) or the corresponding confidence level within 95%. * The prevalence ratio was calculated by the authors of this review. # We assumed most of the study sample was aged 18 years and over based on the reported mean (SD) age of 49.4 (18.5)</p> <p><b>Abbreviations:</b><br/>AMIGO: Occupational and Environmental Health Cohort; BP: Blood Pressure; BMI: Body Mass Index; CCI, Charlson Comorbidity Index; CHS, Clalit Health Services; CI: Confidence Interval; COPD: Chronic Obstructive Pulmonary Disease; CVD: Cardio-Vascular Disease; EMR, Electronic Medical Records; EHR: Electronic Health Record; GP: General Practitioner; GPRD: General Practice Research Database; HCP: Health Care Professional/Practitioner; HR: Hazard Ratio; HYDRA: Hypertension and Diabetes Screening and Awareness; IBD: Inflammatory Bowel Disease; ICD: International Classification of Disease; IMD: Index of Multiple Deprivation; IRR: Incident Rate Ratio; IRSD: Index for Relative Socioeconomic Disadvantage; NAFLD: Non-alcoholic Fatty Liver Disease; NCRAS: National Cancer Registration and Analysis Service; NHS: National Health Service; NP: Nurse Practitioner; NIVEL: Netherlands Institute for Health Services Research; NW: Normal Weight; ONS: Office for National Statistics; OR: Odd Ratio; OW: Overweight; PA: Physician Assistant; PCP: Primary Care Physician; PR: Prevalence Ratio; RA: Rheumatoid Arthritis; Ref: Reference category; RRR: Relative Rate Ratio; SEIFA: Socio-Economic Indexes for Areas; SMI: Severe Mental Illness; SPDS: Sentinel Practices Data Sourcing; THIN: The Health Improvement Network; WC: Waist Circumference; y: years;</p> <p><b>Definitions:</b><br/>Biological sex of participants is denoted by the factor “sex”, we have assumed “gender” and “sex” as an interchangeable factor while reporting on the studies.<br/>Educational level: low = vocational education/ community college; intermediate = vocational/high school; high = college/university or higher<br/>Index of Multiple Deprivation (IMD) Quintile I = least deprived; IMD Quintile V = most deprived.<br/>READ is the Read Coded Clinical Terms code to identify the primary diagnosis.</p> |                                                                                                                                                                                                                                                                                                                                                                                                                                                                                                                        |                                                                                                                                                                                                                                                                                                                                                         |  |                                                                                                                                                                                                                                                                                                                                                                                                                                                                                                                                                                                                                                                                                         |                                                                                                                                                                                                                                                                                                                                                                                                                                                                                                                                                                 |

Supplementary Table S4: Characteristics and summary of qualitative studies reviewed

| Study details                                                                                                                   | Population and setting                                                                                                                                                                                                                                                                                                                                                                                                                                                                   | Study design, aims and methods                                                                                                                                                                                                                                                                                                                                   | Main themes and subthemes with explanations                                                                                                                                                                                                                                                                                                                                                                                                                                                                                                                                                                                                                                                                                                                                                                                                                                                                                                                                                                                                                                                                                                                                                                                                                                                                                                                                                                                                                                                                                                                                                                                                                                                                                                                                                                                                                                                                                                                                                                                                                                                                                                                                                                                                                                                                                                                                                | Author's conclusions and reviewer's comments                                                                                                                                                                                                                                                                                                                                                                                                                                                                                                                                                                                                                                                                                                                                                                                                                                                                                                                      |
|---------------------------------------------------------------------------------------------------------------------------------|------------------------------------------------------------------------------------------------------------------------------------------------------------------------------------------------------------------------------------------------------------------------------------------------------------------------------------------------------------------------------------------------------------------------------------------------------------------------------------------|------------------------------------------------------------------------------------------------------------------------------------------------------------------------------------------------------------------------------------------------------------------------------------------------------------------------------------------------------------------|--------------------------------------------------------------------------------------------------------------------------------------------------------------------------------------------------------------------------------------------------------------------------------------------------------------------------------------------------------------------------------------------------------------------------------------------------------------------------------------------------------------------------------------------------------------------------------------------------------------------------------------------------------------------------------------------------------------------------------------------------------------------------------------------------------------------------------------------------------------------------------------------------------------------------------------------------------------------------------------------------------------------------------------------------------------------------------------------------------------------------------------------------------------------------------------------------------------------------------------------------------------------------------------------------------------------------------------------------------------------------------------------------------------------------------------------------------------------------------------------------------------------------------------------------------------------------------------------------------------------------------------------------------------------------------------------------------------------------------------------------------------------------------------------------------------------------------------------------------------------------------------------------------------------------------------------------------------------------------------------------------------------------------------------------------------------------------------------------------------------------------------------------------------------------------------------------------------------------------------------------------------------------------------------------------------------------------------------------------------------------------------------|-------------------------------------------------------------------------------------------------------------------------------------------------------------------------------------------------------------------------------------------------------------------------------------------------------------------------------------------------------------------------------------------------------------------------------------------------------------------------------------------------------------------------------------------------------------------------------------------------------------------------------------------------------------------------------------------------------------------------------------------------------------------------------------------------------------------------------------------------------------------------------------------------------------------------------------------------------------------|
| <p><b>Authors:</b><br/>Dunkley et al. [85]</p> <p><b>Year published:</b><br/>2009</p> <p><b>Country:</b><br/>United Kingdom</p> | <p><b>Number of participants:</b><br/>10 HCPs (4 PNs, 6 GPs) and 18 patients</p> <p><b>Inclusion criteria:</b><br/>HCPs:<br/>• All GPs and PNs in participating practices<br/>Patients:<br/>• Speak and understand English and/or Gujarati<br/>• Aged 25-75 years</p> <p><b>Exclusion criteria:</b><br/>None</p> <p><b>Setting and population:</b><br/>• General practices in Leicestershire, UK<br/>• Practices were diverse in size and location, with ethnically diverse patients</p> | <p>Qualitative study conducted using purposive sampling, in-depth, semi-structured interviews and thematic analysis.</p> <p><b>Aims:</b><br/>The study aimed to explore the views of patients and HCPs towards waist size measurement, including identification of possible barriers to carrying out this assessment in a multi-ethnic primary care setting.</p> | <p><b>Theme 1:</b><br/>Understanding of waist size measurement to assess or monitor risk</p> <ul style="list-style-type: none"> <li>• HCPs demonstrated awareness of large waist size and risk of diabetes</li> <li>• Association of waist circumference with central obesity was less frequently raised</li> <li>• Awareness of ethnic subspecific recommendations was poor</li> <li>• Nearly half of the patients demonstrated no knowledge on the importance of waist circumference measurement and associated risk of high measurements</li> <li>• Some patients demonstrated perception of denial of the association of body size and health</li> </ul> <p><b>Theme 2:</b><br/>Attitudes related to perceived barriers and facilitators to waist measurement</p> <p><b>Subtheme 1: Standardisation and training needs</b></p> <ul style="list-style-type: none"> <li>• Most HCPs stated no <i>specific training</i> was provided related to implementing WCM</li> <li>• Concerns of HCPs were <i>lack of knowledge</i> on positioning the tape, lack of repeatability, operator variability and interpretation of results</li> </ul> <p><b>Subtheme 2: Perceived usefulness</b></p> <ul style="list-style-type: none"> <li>• Most HCPs agreed WCM was more useful than BMI and stated the need of this assessment in addition to BMI</li> <li>• Some HCPs felt patients are <i>not familiar</i> with waist size and may not understand how it relates to health risks</li> <li>• Some HCPs stated waist measurement was something that could <i>motivate</i> patients to make lifestyle changes</li> <li>• Majority of patients acknowledged the <i>importance of WCM</i> in identifying health problems and facilitating healthy lifestyle changes and thought it would be beneficial for their HCP to know their WCM</li> </ul> <p><b>Subtheme 3: Personal feelings</b></p> <ul style="list-style-type: none"> <li>• For some HCPs, the <i>perceived intimate nature</i> of WCM appeared to be a barrier</li> <li>• <i>HCPs being comfortable</i> appeared to be positively associated with increased experience of measuring waist size and negatively with patients having overweight or obesity</li> <li>• HCPs felt that <i>patients might feel uncomfortable</i> or be embarrassed</li> <li>• Few HCPs demonstrated <i>preconceived ideas</i> about cultural groups</li> </ul> | <p><b>Author's conclusions:</b><br/>“This study adds to our understanding of views on WCM in a multi-ethnic setting, highlighting factors for consideration if WCM is to be facilitated in routine practice.”</p> <p><b>Reviewer's comments:</b></p> <ul style="list-style-type: none"> <li>• This study revealed several barriers to implementing WC measurement including lack of knowledge and specific training, negative perceptions about its usefulness, clinical importance, and acceptability (time and cost among HCPs; comfortableness, appearance, and hygiene concerns among their patients)</li> <li>• Perceived enablers of WC measurement include its usefulness to motivate healthy behavioural changes among patients, financial and organisational incentives for HCPs</li> <li>• Findings were consistent across GPs, PNs, and ethnic groups</li> </ul> <p>This study has clearly met 7/10 (70%) criteria in the critical appraisal tool.</p> |

|                                                                                                                               |                                                                                                                                                                                                                                                                                                                                                                                                                                                                                                                                                                         |                                                                                                                                                                                                                                                                                    |                                                                                                                                                                                                                                                                                                                                                                                                                                                                                                                                                                                                                                                                                                                                                                                                                                                                                                                                                                                                                                                                                                                                                                               |                                                                                                                                                                                                                                                                                                                                                                                                                                                                                                                                                                        |
|-------------------------------------------------------------------------------------------------------------------------------|-------------------------------------------------------------------------------------------------------------------------------------------------------------------------------------------------------------------------------------------------------------------------------------------------------------------------------------------------------------------------------------------------------------------------------------------------------------------------------------------------------------------------------------------------------------------------|------------------------------------------------------------------------------------------------------------------------------------------------------------------------------------------------------------------------------------------------------------------------------------|-------------------------------------------------------------------------------------------------------------------------------------------------------------------------------------------------------------------------------------------------------------------------------------------------------------------------------------------------------------------------------------------------------------------------------------------------------------------------------------------------------------------------------------------------------------------------------------------------------------------------------------------------------------------------------------------------------------------------------------------------------------------------------------------------------------------------------------------------------------------------------------------------------------------------------------------------------------------------------------------------------------------------------------------------------------------------------------------------------------------------------------------------------------------------------|------------------------------------------------------------------------------------------------------------------------------------------------------------------------------------------------------------------------------------------------------------------------------------------------------------------------------------------------------------------------------------------------------------------------------------------------------------------------------------------------------------------------------------------------------------------------|
|                                                                                                                               |                                                                                                                                                                                                                                                                                                                                                                                                                                                                                                                                                                         |                                                                                                                                                                                                                                                                                    | <ul style="list-style-type: none"> <li>• Patients did not think that they would be embarrassed or feel uncomfortable about having their waist measured</li> <li>• Few female patients stated <i>preference for being measured by a female HCP</i>, but this was not seen as essential</li> </ul> <p><b>Subtheme 4: Practical considerations</b></p> <ul style="list-style-type: none"> <li>• Majority of HCPs mentioned <i>time as a barrier</i> in relation to appointment length and extra workload associated</li> <li>• Majority of HCPs raised <i>cost implications</i> as a barrier in implementation of WCM</li> <li>• HCPs suggested inclusion of WCM in the Quality and Outcomes Framework (QoF) as a <i>potential incentive</i> along with <i>organisational incentives</i> for implementing WCM</li> <li>• <i>Patient's concerns</i> included perceptions about hygiene, the need to wear appropriate clothing, time implications and a perceived need for the opportunity to consider whether it would be appropriate to bring children to the appointment</li> </ul>                                                                                             |                                                                                                                                                                                                                                                                                                                                                                                                                                                                                                                                                                        |
| <p><b>Authors:</b><br/>Gaynor et al. [86]</p> <p><b>Year published:</b><br/>2018</p> <p><b>Country:</b><br/>United States</p> | <p><b>Number of participants:</b><br/>7 PC Providers (5 NPs; 1 Doctor of Medicine; 1 Doctor of Osteopathy) attended interviews. 30 PCPs (Doctor of Medicine, Doctor of Osteopathy, NPs and 1 physician assistant) completed the surveys.</p> <p><b>Inclusion criteria:</b></p> <ul style="list-style-type: none"> <li>• PC providers</li> </ul> <p><b>Exclusion criteria:</b><br/>None</p> <p><b>Setting and population:</b></p> <ul style="list-style-type: none"> <li>• 6 PC practices in South-eastern Pennsylvania, New Castle and Kent County, Delaware</li> </ul> | <p>Explanatory mixed-methods design. Qualitative component involved purposive sampling, semi-structured interviews and thematic analysis.</p> <p><b>Aims:</b><br/>The study aimed to gain a deeper understanding of waist circumference measurement rejection in primary care.</p> | <p><b>Theme 1:</b><br/>Innovation characteristics</p> <ul style="list-style-type: none"> <li>• WCM did not offer greater advantage, compatibility, ease of use, or ease of trial over BMI</li> <li>• Disadvantages of WCM included time associated with obtaining and documenting measurement, discomfort with measuring a patient's WCM, lack of knowledge and training re technique, lack of equipment (i.e., tape measures)</li> </ul> <p><b>Theme 2:</b><br/>Communication channels and the social system</p> <ul style="list-style-type: none"> <li>• Peer-to-peer communications had the greatest influence on provider use of measurements, followed by formal education and clinical experiences, experiences with preceptors, webinars, apps and conferences, and professional journals</li> </ul> <p><b>Theme 3:</b><br/>Time, comfort and practice norms</p> <ul style="list-style-type: none"> <li>• Lack of time served as a barrier to adopting WCM</li> <li>• Measurements were taken if part of routine practice</li> <li>• PC providers expressed discomfort in obtaining WCM for members of the opposite sex or people who were overweight/obese</li> </ul> | <p><b>Author's conclusions:</b><br/>"Before implementing a new initiative, WCM training modules and time efficient plans for obtaining WCM in PC settings should be piloted."</p> <p><b>Reviewer's comments:</b></p> <ul style="list-style-type: none"> <li>• Confusing presentation of qualitative results</li> <li>• Qualitative data collected in 2 group interviews and one individual interview. Unclear whether the group interviews were actually focus groups</li> </ul> <p>This study has clearly met 8/10 (80%) criteria in the critical appraisal tool.</p> |

|                                                                                                                                |                                                                                                                                                                                                                                                                                                                                                                                                                                                                                     |                                                                                                                                                                                                                                                                                                                                         |                                                                                                                                                                                                                                                                                                                                                                                                                                                                                                                                                                                                                                                                                                                                                                                                                                                                                                                                                                                                                                                                                                                                                                                                                                                                                                                                                                                                                                                                                                                                                                                                                                                                                                                                                                                                                                                                                                                                                                                                                                                                                                                                                                                                                                                                                                                                                                                                                                                                                                                                                                                                                                                                                                                                                                                                                               |                                                                                                                                                                                                                                                                                                                                                                                                                                                                                                                                                                                                                                                                                                                                                                                                                                                                                                                                                               |
|--------------------------------------------------------------------------------------------------------------------------------|-------------------------------------------------------------------------------------------------------------------------------------------------------------------------------------------------------------------------------------------------------------------------------------------------------------------------------------------------------------------------------------------------------------------------------------------------------------------------------------|-----------------------------------------------------------------------------------------------------------------------------------------------------------------------------------------------------------------------------------------------------------------------------------------------------------------------------------------|-------------------------------------------------------------------------------------------------------------------------------------------------------------------------------------------------------------------------------------------------------------------------------------------------------------------------------------------------------------------------------------------------------------------------------------------------------------------------------------------------------------------------------------------------------------------------------------------------------------------------------------------------------------------------------------------------------------------------------------------------------------------------------------------------------------------------------------------------------------------------------------------------------------------------------------------------------------------------------------------------------------------------------------------------------------------------------------------------------------------------------------------------------------------------------------------------------------------------------------------------------------------------------------------------------------------------------------------------------------------------------------------------------------------------------------------------------------------------------------------------------------------------------------------------------------------------------------------------------------------------------------------------------------------------------------------------------------------------------------------------------------------------------------------------------------------------------------------------------------------------------------------------------------------------------------------------------------------------------------------------------------------------------------------------------------------------------------------------------------------------------------------------------------------------------------------------------------------------------------------------------------------------------------------------------------------------------------------------------------------------------------------------------------------------------------------------------------------------------------------------------------------------------------------------------------------------------------------------------------------------------------------------------------------------------------------------------------------------------------------------------------------------------------------------------------------------------|---------------------------------------------------------------------------------------------------------------------------------------------------------------------------------------------------------------------------------------------------------------------------------------------------------------------------------------------------------------------------------------------------------------------------------------------------------------------------------------------------------------------------------------------------------------------------------------------------------------------------------------------------------------------------------------------------------------------------------------------------------------------------------------------------------------------------------------------------------------------------------------------------------------------------------------------------------------|
| <p><b>Authors:</b><br/>McHale et al. [87]</p> <p><b>Year published:</b><br/>2020</p> <p><b>Country:</b><br/>United Kingdom</p> | <p><b>Number of participants:</b><br/>305 patients completed a questionnaire and 14 PCPs (12 GPs; 2 PNs) completed a questionnaire and participated in interviews</p> <p><b>Inclusion criteria:</b><br/>PCPs:<br/>• GPs and PNs in 7 participating practices<br/>Patients:<br/>• Consulted by one of the participating PCPs</p> <p><b>Exclusion criteria:</b><br/>None</p> <p><b>Setting and population:</b><br/>• 7 Primary Care Practices across 3 NHS Scotland health boards</p> | <p>Convergent mixed methods design using convenience sampling. Qualitative component used semi-structured interviews and thematic analysis.</p> <p><b>Aims:</b><br/>The study aimed to understand the beliefs that PCPs and patients with overweight and obesity have about obesity and primary care weight management in Scotland.</p> | <p><b>Theme 1:</b><br/>PCP role in patient weight management</p> <ul style="list-style-type: none"> <li>• GPs and PNs had differing views about the role of primary care in patient weight management</li> <li>• Addressing patient weight issues and awareness was GPs' professional responsibility particularly when patients' excessive weight was impacting on their health or when patients requested assistance with their weight</li> <li>• Some GPs did not believe it was their role to engage patients in preventative weight management or monitor their weight and did not perceive prevention and monitoring were an efficient use of their time</li> <li>• GPs perceived that standalone weight issues were the responsibility of the patient, not primary care</li> <li>• PN participants perceived direct weight management was part of their role and regularly engaged in weight management and monitoring with patients</li> </ul> <p><b>Theme 2:</b><br/>Discussing weight issues with patients</p> <ul style="list-style-type: none"> <li>• PCPs preferred to discuss weight issues within the context of patients' existing health issues</li> <li>• PCPs expressed an apprehension to start a discussion about patient weight when they could not establish a clear link between existing health issues and the patient's weight, or when patients did not recognise that their body weight was excessive and potentially problematic</li> <li>• PCPs perceived that weight was a personal issue, and discussing weight without a health-related reason, was inappropriate and may elicit a negative emotional reaction</li> </ul> <p><b>Theme 3:</b><br/>Barriers to weight management</p> <ul style="list-style-type: none"> <li>• The inefficacy of weight management interventions was a barrier</li> <li>• There was a lack of confidence in the evidence base for weight management interventions recommended by clinical guidelines</li> <li>• Systemic barriers to weight management included lack of consultation time, restrictive eligibility criteria for specialised weight management referrals and shortage of financial and human resources in primary care</li> <li>• Lack of referral pathways for overweight patients when weight was not impacting on their health</li> <li>• One PCP highlighted that current NHS working contracts did not prioritise or incentivise weight management</li> <li>• Several PCPs described patients with overweight and obesity as lacking the motivation to address weight issues, and that for many patients their weight was not a priority</li> <li>• PCPs acknowledged that training was always potentially useful; however, most were confident in their ability and were ambivalent about receiving additional weight management</li> </ul> | <p><b>Author's conclusions:</b><br/>"Acknowledging a shared responsibility for patient weight could improve outcome for patients with overweight and obesity. There is a pressing need to review, standardise and clarify the primary care weight management process in NHS Scotland."</p> <p><b>Reviewer's comments:</b></p> <ul style="list-style-type: none"> <li>• This study revealed that PCPs acknowledged a responsibility for patient weight but they found it challenging to discuss weight related issues with patients</li> <li>• There were multiple barriers to weight management, both systemic and patient related</li> <li>• Some inconsistencies in terminology related to the design, which is a little confusing, i.e., authors refer to cross-sectional mixed methods; convergent mixed methods; concurrent triangulation mixed methods</li> </ul> <p>This study has clearly met 7/10 (70%) criteria in the critical appraisal tool.</p> |
|--------------------------------------------------------------------------------------------------------------------------------|-------------------------------------------------------------------------------------------------------------------------------------------------------------------------------------------------------------------------------------------------------------------------------------------------------------------------------------------------------------------------------------------------------------------------------------------------------------------------------------|-----------------------------------------------------------------------------------------------------------------------------------------------------------------------------------------------------------------------------------------------------------------------------------------------------------------------------------------|-------------------------------------------------------------------------------------------------------------------------------------------------------------------------------------------------------------------------------------------------------------------------------------------------------------------------------------------------------------------------------------------------------------------------------------------------------------------------------------------------------------------------------------------------------------------------------------------------------------------------------------------------------------------------------------------------------------------------------------------------------------------------------------------------------------------------------------------------------------------------------------------------------------------------------------------------------------------------------------------------------------------------------------------------------------------------------------------------------------------------------------------------------------------------------------------------------------------------------------------------------------------------------------------------------------------------------------------------------------------------------------------------------------------------------------------------------------------------------------------------------------------------------------------------------------------------------------------------------------------------------------------------------------------------------------------------------------------------------------------------------------------------------------------------------------------------------------------------------------------------------------------------------------------------------------------------------------------------------------------------------------------------------------------------------------------------------------------------------------------------------------------------------------------------------------------------------------------------------------------------------------------------------------------------------------------------------------------------------------------------------------------------------------------------------------------------------------------------------------------------------------------------------------------------------------------------------------------------------------------------------------------------------------------------------------------------------------------------------------------------------------------------------------------------------------------------------|---------------------------------------------------------------------------------------------------------------------------------------------------------------------------------------------------------------------------------------------------------------------------------------------------------------------------------------------------------------------------------------------------------------------------------------------------------------------------------------------------------------------------------------------------------------------------------------------------------------------------------------------------------------------------------------------------------------------------------------------------------------------------------------------------------------------------------------------------------------------------------------------------------------------------------------------------------------|

|                                                                                                                                                                                                                                                                                                                                 |  |  |                                                                                                            |  |
|---------------------------------------------------------------------------------------------------------------------------------------------------------------------------------------------------------------------------------------------------------------------------------------------------------------------------------|--|--|------------------------------------------------------------------------------------------------------------|--|
|                                                                                                                                                                                                                                                                                                                                 |  |  | training. Lack of weight management effectiveness was due to patient factors, including lack of motivation |  |
| <b>Abbreviations:</b><br>BMI: Body Mass Index; GP: General Practitioner; HCP: Health Care Professional/Practitioner; NHS: National Health Service; NP: Nurse Practitioner; PC: Primary Care; PCP: Primary Care Provider; PN: Practice Nurse; UK: United Kingdom; WC: Waist Circumference; WCM: Waist Circumference Measurement. |  |  |                                                                                                            |  |



**Supplementary Table S5: Risk of bias assessment of studies reviewed**

| Cohort                                  | 1. Were the two groups similar and recruited from the same population? | 2. Were the exposure s measured similarly to assign people to both exposed and unexposed groups? | 3. Was the exposure measured in a valid and reliable way? | 4. Were confounding factors identified?                                     | 5. Were strategies to deal with confounding factors stated? | 6. Were the groups/participants free of the outcome at the start of the study (or at the moment of exposure)? | 7. Were the outcomes measured in a valid and reliable way? | 8. Was the follow up time reported and sufficient to be long enough for outcomes to occur? | 9. Was follow up complete, and if not, were the reasons to loss to follow up described and explored? | 10. Were strategies to address incomplete follow up utilized? | 11. Was appropriate statistical analysis used? | Overall Quality | Unclear | Proportion |
|-----------------------------------------|------------------------------------------------------------------------|--------------------------------------------------------------------------------------------------|-----------------------------------------------------------|-----------------------------------------------------------------------------|-------------------------------------------------------------|---------------------------------------------------------------------------------------------------------------|------------------------------------------------------------|--------------------------------------------------------------------------------------------|------------------------------------------------------------------------------------------------------|---------------------------------------------------------------|------------------------------------------------|-----------------|---------|------------|
| Booth, Prevost & Gulliford (2013)       | Yes                                                                    | Yes                                                                                              | Yes                                                       | Yes                                                                         | Yes                                                         | Not applicable                                                                                                | Yes                                                        | Yes                                                                                        | Yes                                                                                                  | No                                                            | Yes                                            | 9/10            | 0       | 90%        |
| Emanuel et al. (2016)                   | Yes                                                                    | Yes                                                                                              | Yes                                                       | Yes                                                                         | Yes                                                         | Not applicable                                                                                                | Unclear                                                    | Yes                                                                                        | Not applicable                                                                                       | Not applicable                                                | Yes                                            | 7/8             | 1       | 88%        |
| Nicholson et al. (2019)                 | Yes                                                                    | Yes                                                                                              | Unclear                                                   | Yes                                                                         | Yes                                                         | Not applicable                                                                                                | Unclear                                                    | Yes                                                                                        | Yes                                                                                                  | No                                                            | Yes                                            | 7/10            | 2       | 70%        |
| Osborn et al. (2011)                    | Yes                                                                    | Yes                                                                                              | Yes                                                       | Yes                                                                         | Yes                                                         | Not applicable                                                                                                | Yes                                                        | Yes                                                                                        | Unclear                                                                                              | No                                                            | Yes                                            | 8/10            | 1       | 80%        |
| Cross-sectional                         | 1. Were the criteria for inclusion in the sample clearly defined?      | 2. Were the study subjects and the setting described in detail?                                  | 3. Was the exposure measured in a valid and reliable way? | 4. Were objective, standard criteria used for measurement of the condition? | 5. Were confounding factors identified?                     | 6. Were strategies to deal with confounding factors stated?                                                   | 7. Were the outcomes measured in a valid and reliable way? | 8. Was appropriate statistical analysis used?                                              |                                                                                                      |                                                               |                                                | Overall Quality | Unclear | Proportion |
| Aleem et al. (2015)                     | Yes                                                                    | Yes                                                                                              | Yes                                                       | Yes                                                                         | No                                                          | No                                                                                                            | Yes                                                        | No                                                                                         |                                                                                                      |                                                               |                                                | 5/8             | 0       | 63%        |
| Baer et al. (2013)                      | Yes                                                                    | Yes                                                                                              | Yes                                                       | Yes                                                                         | Yes                                                         | Yes                                                                                                           | Yes                                                        | Yes                                                                                        |                                                                                                      |                                                               |                                                | 8/8             | 0       | 100%       |
| Bleich, Pickett-Blakely & Cooper (2011) | Yes                                                                    | Yes                                                                                              | Yes                                                       | Yes                                                                         | Yes                                                         | Yes                                                                                                           | Yes                                                        | Yes                                                                                        |                                                                                                      |                                                               |                                                | 8/8             | 0       | 100%       |
| Bramlage et al. (2014)                  | Yes                                                                    | Yes                                                                                              | Yes                                                       | Yes                                                                         | Yes                                                         | Yes                                                                                                           | Yes                                                        | Unclear                                                                                    |                                                                                                      |                                                               |                                                | 7/8             | 1       | 88%        |

|                                |                                                                                                         |                                                                                                        |                                                                                                     |                                                                                                            |                                                                                                  |                                                                                     |                                                                                          |                                                                       |                                                                                                                                                           |                                                                                                                    |  |                        |                |                   |
|--------------------------------|---------------------------------------------------------------------------------------------------------|--------------------------------------------------------------------------------------------------------|-----------------------------------------------------------------------------------------------------|------------------------------------------------------------------------------------------------------------|--------------------------------------------------------------------------------------------------|-------------------------------------------------------------------------------------|------------------------------------------------------------------------------------------|-----------------------------------------------------------------------|-----------------------------------------------------------------------------------------------------------------------------------------------------------|--------------------------------------------------------------------------------------------------------------------|--|------------------------|----------------|-------------------|
| Cuccu, Abi-Aad & Duggal (2019) | Yes                                                                                                     | Yes                                                                                                    | Yes                                                                                                 | Yes                                                                                                        | Yes                                                                                              | Yes                                                                                 | Yes                                                                                      | Yes                                                                   |                                                                                                                                                           |                                                                                                                    |  | 8/8                    | 0              | 100%              |
| Cyr et al. (2016)              | Yes                                                                                                     | Yes                                                                                                    | Yes                                                                                                 | Yes                                                                                                        | Yes                                                                                              | Yes                                                                                 | Yes                                                                                      | Yes                                                                   |                                                                                                                                                           |                                                                                                                    |  | 8/8                    | 0              | 100%              |
| Dalton et al. (2011)           | Yes                                                                                                     | Yes                                                                                                    | Yes                                                                                                 | Yes                                                                                                        | Yes                                                                                              | Yes                                                                                 | Yes                                                                                      | Yes                                                                   |                                                                                                                                                           |                                                                                                                    |  | 8/8                    | 0              | 100%              |
| Ghosh (2016)                   | Yes                                                                                                     | Yes                                                                                                    | Yes                                                                                                 | Yes                                                                                                        | Yes                                                                                              | Yes                                                                                 | Yes                                                                                      | Yes                                                                   |                                                                                                                                                           |                                                                                                                    |  | 8/8                    | 0              | 100%              |
| Gonzalez-Chica et al. (2019)   | Yes                                                                                                     | Yes                                                                                                    | Yes                                                                                                 | Yes                                                                                                        | Yes                                                                                              | Yes                                                                                 | Yes                                                                                      | Yes                                                                   |                                                                                                                                                           |                                                                                                                    |  | 8/8                    | 0              | 100%              |
| Gutiérrez Angulo et al. (2014) | Yes                                                                                                     | Unclear                                                                                                | Yes                                                                                                 | Yes                                                                                                        | No                                                                                               | No                                                                                  | Yes                                                                                      | No                                                                    |                                                                                                                                                           |                                                                                                                    |  | 4/8                    | 1              | 50%               |
| Mattar et al. (2017)           | Yes                                                                                                     | Yes                                                                                                    | Yes                                                                                                 | Yes                                                                                                        | Yes                                                                                              | Yes                                                                                 | Yes                                                                                      | Yes                                                                   |                                                                                                                                                           |                                                                                                                    |  | 8/8                    | 0              | 100%              |
| Melamed et al. (2009)          | Yes                                                                                                     | Yes                                                                                                    | Yes                                                                                                 | Yes                                                                                                        | Yes                                                                                              | Yes                                                                                 | Yes                                                                                      | Yes                                                                   |                                                                                                                                                           |                                                                                                                    |  | 8/8                    | 0              | 100%              |
| Mocarski et al. (2018)         | Yes                                                                                                     | Yes                                                                                                    | Yes                                                                                                 | Yes                                                                                                        | Yes                                                                                              | Yes                                                                                 | Yes                                                                                      | Yes                                                                   |                                                                                                                                                           |                                                                                                                    |  | 8/8                    | 0              | 100%              |
| Rose et al. (2009)             | Yes                                                                                                     | Yes                                                                                                    | Yes                                                                                                 | Yes                                                                                                        | No                                                                                               | No                                                                                  | Yes                                                                                      | No                                                                    |                                                                                                                                                           |                                                                                                                    |  | 5/8                    | 0              | 63%               |
| Ruser et al. (2005)            | Yes                                                                                                     | Yes                                                                                                    | Yes                                                                                                 | Yes                                                                                                        | Unclear                                                                                          | Yes                                                                                 | Yes                                                                                      | Unclear                                                               |                                                                                                                                                           |                                                                                                                    |  | 6/8                    | 2              | 75%               |
| Turner, Harris & Mazza (2015)  | Yes                                                                                                     | Yes                                                                                                    | Yes                                                                                                 | Yes                                                                                                        | Yes                                                                                              | Yes                                                                                 | Yes                                                                                      | Yes                                                                   |                                                                                                                                                           |                                                                                                                    |  | 8/8                    | 0              | 100%              |
| Verberne et al. (2018)         | Yes                                                                                                     | Yes                                                                                                    | Yes                                                                                                 | Yes                                                                                                        | Yes                                                                                              | Yes                                                                                 | Yes                                                                                      | Yes                                                                   |                                                                                                                                                           |                                                                                                                    |  | 8/8                    | 0              | 100%              |
| Yoong et al. (2014)            | Yes                                                                                                     | Yes                                                                                                    | Yes                                                                                                 | Yes                                                                                                        | Yes                                                                                              | Yes                                                                                 | Unclear                                                                                  | Yes                                                                   |                                                                                                                                                           |                                                                                                                    |  | 7/8                    | 1              | 88%               |
| <b>Qualitative research</b>    | <b>1. Is there congruity between the stated philosophical perspective and the research methodology?</b> | <b>2. Is there congruity between the research methodology and the research question or objectives?</b> | <b>3. Is there congruity between the research methodology and the methods used to collect data?</b> | <b>4. Is there congruity between the research methodology and the representation and analysis of data?</b> | <b>5. Is there congruity between the research methodology and the interpretation of results?</b> | <b>6. Is there a statement locating the researcher culturally or theoretically?</b> | <b>7. Is the influence of the researcher on the research, and vice-versa, addressed?</b> | <b>8. Are participants, and their voices, adequately represented?</b> | <b>9. Is the research ethical according to current criteria or, for recent studies, and is there evidence of ethical approval by an appropriate body?</b> | <b>10. Do the conclusions drawn in the research report flow from the analysis, or interpretation, of the data?</b> |  | <b>Overall Quality</b> | <b>Unclear</b> | <b>Proportion</b> |
| Dunkley et al. (2009)          | No                                                                                                      | Yes                                                                                                    | Yes                                                                                                 | Yes                                                                                                        | Yes                                                                                              | No                                                                                  | No                                                                                       | Yes                                                                   | Yes                                                                                                                                                       | Yes                                                                                                                |  | 7/10                   | 0              | 70%               |
| Gaynor et al (2018)            | Yes                                                                                                     | Yes                                                                                                    | Yes                                                                                                 | Yes                                                                                                        | Yes                                                                                              | Yes                                                                                 | No                                                                                       | No                                                                    | Yes                                                                                                                                                       | Yes                                                                                                                |  | 8/10                   | 0              | 80%               |

|                     |    |     |     |     |     |    |    |     |     |     |  |      |   |     |
|---------------------|----|-----|-----|-----|-----|----|----|-----|-----|-----|--|------|---|-----|
| McHale et al (2020) | No | Yes | Yes | Yes | Yes | No | No | Yes | Yes | Yes |  | 7/10 | 0 | 70% |
|---------------------|----|-----|-----|-----|-----|----|----|-----|-----|-----|--|------|---|-----|

## Supplementary Section S6: Summary of results from all meta-analyses

### S6.1 Sex as a predictor of BMI assessment

There is statistically significant evidence that BMI assessment is more common in females than in males overall, as well as specific to UK and USA (Table S6.1). As expected, odds ratios are larger than risk ratios. The association is stronger in the higher quality and larger studies. The very high heterogeneity between studies is not relieved by any of the sub-group variable nor by excluding studies with a lower quality rating.

Table S6.1 Summary statistics from the meta-analyses of females relative to males, including sub-group and sensitivity analyses

|                           | Reference category         | No. of studies | Pooled risk ratio | I <sup>2</sup> , heterogeneity test p-value |
|---------------------------|----------------------------|----------------|-------------------|---------------------------------------------|
| Sex                       | Male                       | 15             | 1.28 (1.10,1.50)  | 99.8%, p<0.001                              |
| Subgroup by outcome       | - BMI assessment           | 8              | 1.27 (1.02,1.58)  | 99.9%, p<0.001                              |
|                           | - BMI diagnosis assessment | 6              | 1.34 (0.87,2.05)  | 95.0%, p<0.001                              |
| Subgroup by ratio measure | - odds ratio               | 11             | 1.45 (1.21,1.74)  | 99.5%, p<0.001                              |
|                           | - risk ratio               | 4              | 1.18 (1.04,1.35)  | 99.7%, p<0.001                              |
| Subgroup by country       | - Australia                | 3              | 0.99 (0.79,1.25)  | 87.2%, p<0.001                              |
|                           | - UK                       | 3              | 1.27 (1.02,1.60)  | 100%, p<0.001                               |
|                           | - USA                      | 6              | 1.33 (1.20,1.48)  | 97.0%, p<0.001                              |
|                           | - Other                    | 3              | 1.32 (0.81,2.16)  | 91.2%, p<0.001                              |
| Sensitivity by quality    | - High quality             | 10             | 1.45 (1.21,1.74)  | 99.6%, p<0.001                              |

The Funnel plot (Figure S6.1) and Egger's test (p=0.905) reveal no statistically significant evidence of reporting bias.

Figure S6.1 Funnel plot of sex as a predictor of BMI assessment

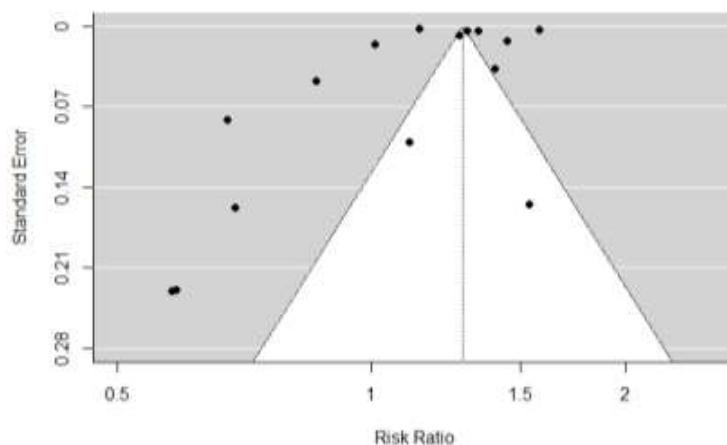

### S6.2 Age as a predictor of BMI assessment

Age categories varied between studies. For meta-analysis the rate of BMI assessment in the age group closest to or including 65 years relative to the age group closest to or including 30 age group are identified and pooled. The actual results pooled were the BMI assessment for 65 or more years relative to 18-29 years,[65 84] 65 or more years relative to 18-39 years,[69] 65-74 years relative to 18-24 years,[66 68] 65-74 years relative to 18-44 years,[72] 60-69 years relative to 18-29 years,[64 78] 61-67 years relative to 31-40 years,[83] 60 or more years relative to 30-44 years,[67] 56-74 years relative to 19-44 years,[82] and 55 or more years relative to less than 55 years.[76]

One study[75] presented results for age as a continuous variable and another[70] presented results for sex by age categories. Neither could not be included in the meta-analysis.

There is no statistically significant evidence that the rate of BMI assessment differs between the older and younger age groups (Table S6.2). The only statistically significant result occurs in the 'other countries' category in which a study from Israel[76] is combined with a study from Germany,[67] both of which recorded a statistically significant increased rate of BMI assessment in the older age group. The Funnel plot (Figure S6.2) and Egger's test ( $p=0.348$ ) reveal no evidence of reporting bias.

There is very high heterogeneity between studies. This is not alleviated by any of the grouping variables or by the exclusion of studies with a lower quality rating.

Table S6.2 Summary statistics from the meta-analyses of oldest age group relative to youngest, including sub-group and sensitivity analyses

|                          | Reference category  | No. of studies | Pooled ratio     | I <sup>2</sup> , heterogeneity test p-value |
|--------------------------|---------------------|----------------|------------------|---------------------------------------------|
| Age                      | Closest to 30 years | 12             | 0.90 (0.50,1.63) | 100%, p<0.001                               |
| Subgroup by outcome      |                     |                |                  |                                             |
| - recorded BMI           | Closest to 30 years | 8              | 1.21 (0.82,1.78) | 99.8%, p<0.001                              |
| - recorded BMI diagnosis | Closest to 30 years | 4              | 0.52 (0.25,1.05) | 83.3%, p<0.001                              |
| Subgroup by country      |                     |                |                  |                                             |
| - Australia              | Closest to 30 years | 3              | 1.11 (0.98,1.26) | 83.6%, p=0.002                              |
| - UK                     | Closest to 30 years | 3              | 1.22 (0.78,1.90) | 99.9%, p<0.001                              |
| - USA                    | Closest to 30 years | 4              | 0.53 (0.24,1.17) | 99.4%, p<0.001                              |
| - Other                  | Closest to 30 years | 2              | 2.61 (1.73,3.95) | 0%, p=0.836                                 |
| Sensitivity by quality   |                     |                |                  |                                             |
| - High quality           | Closest to 30 years | 9              | 0.69 (0.19,2.48) | 100%, p<0.001                               |

The funnel plot shown in Figure S6.2 confirms high heterogeneity (many studies outside the central funnel) but provides no evidence of publication bias. Egger's test also returned no statistically significant evidence of small study bias ( $p=0.348$ ).

Figure S6.2 Funnel plot of age group as a predictor of BMI assessment

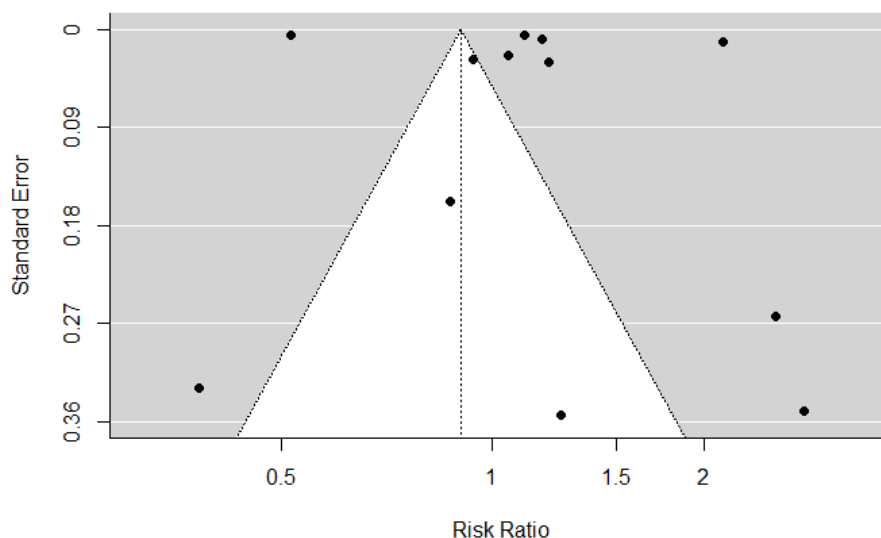

### S6.3 Race/ethnicity as a predictor of BMI assessment

Results were provided by race/ethnicity group in nine studies, but the classification used varied considerable between studies and countries. For example, one study from the UK classified ethnic groups as White, Indian, Bangladeshi, Pakistani, Chinese, Other Asian, Black African, Black Caribbean, Other Black, Other, Mixed Race or Unknown[78] while a US study used a very different classification of White, Asian, Black, Hispanic, Native American, Multi-race, and Other.[77]

In the meta-analysis the race/ethnicity categories 'White' and 'Caucasian' were regarded as equivalent. The reference category was 'White' or 'Caucasian' [84] for eight of the nine studies. Three of these[69 80 84] defined a single comparator group 'Other' or 'non-Caucasian'. Five had multiple comparator race/ethnicity categories which we combined into a

single 'Non-White' category using the method in another.[88] One study[75] defined 'Black' as the reference category. We inverted the results for 'White' compared to 'Black' but as the remaining categories 'Hispanic' or 'Other' were only compared to 'Black' we could not include them in the 'White' against 'Non-White' meta-analysis.

Meta-analyses revealed statistically significant evidence that BMI assessment is more common in people of non-White race/ethnicity than in White race/ethnicity overall, particularly when BMI is recorded as a diagnosis (Table S6.3). The effect size may be marginally stronger in the higher quality studies, though the smaller sample size leads to wider confidence intervals. There are very high levels of heterogeneity between the studies, and this is not alleviated by sub-groups or exclusion of studies with lower quality scores.

Table S6.3 Summary statistics from the meta-analyses of non-White relative to White race/ethnicity, including sub-group and sensitivity analyses

|                            | Reference category | No. of studies | Pooled risk ratio | I <sup>2</sup> , heterogeneity test p-value |
|----------------------------|--------------------|----------------|-------------------|---------------------------------------------|
| Race/ethnicity             | White              | 9              | 1.27 (1.03,1.57)  | 99.6%, p<0.001                              |
| Subgroup by outcome        |                    |                |                   |                                             |
| - BMI assessment           | White              | 4              | 1.10 (0.97,1.25)  | 99.1%, p<0.001                              |
| - BMI diagnosis assessment | White              | 5              | 1.43 (0.78,2.61)  | 82.2%, p<0.001                              |
| Sensitivity by quality     |                    |                |                   |                                             |
| - High quality             | White              | 6              | 1.36 (0.86,2.16)  | 99.5%, p<0.001                              |

The Funnel plot (Figure S6.3) suggests a tendency for smaller studies to find that non-Whites have lower rates of BMI assessment than Whites. As there are less than 10 studies, Egger's test at p=0.083 may be underpowered.

Figure S6.3 Funnel plot of race/ethnicity as a predictor of BMI assessment



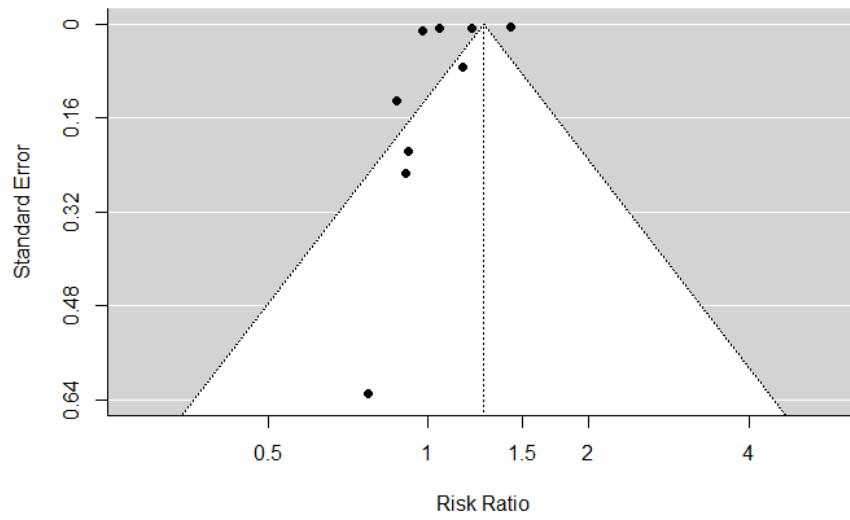

#### S6.4 Deprivation as a predictor of BMI assessment

All four studies reporting relative rates of BMI assessment across socio-economic groups were from the UK.[68 70 71] All used postcode-based Indexes of Multiple Deprivation, although version differed.

The pooled results (Table S6.4) provide statistically significant evidence that BMI assessment was more likely among those with most compared with least deprivation, although heterogeneity was high. Given the small number of studies, sub-group and sensitivity analyses are not pursued.

Table S6.4 Summary statistics from the meta-analysis of greatest deprivation relative to least

|                   | Reference category | No. of studies | Pooled risk ratio | I <sup>2</sup> , heterogeneity test p-value |
|-------------------|--------------------|----------------|-------------------|---------------------------------------------|
| Deprivation index | Least              | 4              | 1.21 (1.18,1.24)  | 73.9%, p=0.009                              |

### S6.5 Health insurance status as a predictor of BMI assessment

Five of the 6 studies reporting insurance status as a predictor of BMI assessment used ‘private’ insurance as the reference category. The remaining study[75] could not be include in the meta-analysis as the reference category was unclear, but was not ‘private’. Two studies compared ‘Private’ to ‘Not private’.[65 84] The remaining three studies[63 64 69] had multiple comparator categories (‘Medicare’, ‘Medicaid’, ‘Other’, ‘Self-Pay/None’) which we combined into a single ‘Not private’ category using the method in another study.[88]

The pooled results (Table S6.5) provide no evidence of association between health insurance status and BMI assessment.

Table S6.5 Summary statistics from the meta-analysis of non-private against private health insurance

|                  | Reference category | No. of studies | Pooled risk ratio | I <sup>2</sup> , heterogeneity test p-value |
|------------------|--------------------|----------------|-------------------|---------------------------------------------|
| Insurance status | Private            | 5              | 1.01 (0.83,1.23)  | 95.3%, p<0.001                              |

### S6.6 BMI category as a predictor of BMI assessment

The different studies compared BMI assessment rates across varying BMI-based weight categories. The meta-analysis pools the comparisons of the heaviest available weight group to the lightest available group. These comparison groups were ‘BMI 40+’ relative to ‘BMI 25-29.9’,<sup>[66 69]</sup> ‘BMI 40+’ relative to ‘BMI 30-34.9’,<sup>[65]</sup> ‘BMI 40+’ relative to ‘BMI <40’,<sup>[75]</sup> ‘BMI 35+’ relative to ‘BMI 18.5-24.99’,<sup>[78]</sup> ‘BMI 30+’ relative to ‘BMI <30’,<sup>[76]</sup> and ‘BMI 30+’ relative to ‘BMI 25-29.9’.<sup>[81 83]</sup>

The results of the meta-analyses are presented in Table S6.6. There is very high heterogeneity between the studies. The overall pooled risk ratio is suggestive of an increased rate of BMI assessment among heavier patients, but statistical significance is not reached. The differences between higher and lower weight categories appear to be greater when BMI is being recorded as a diagnosis and when analyses are restricted to studies with the highest quality rating score. However, high heterogeneity and correspondingly wide confidence intervals negate definitive interpretations.

Table S6.6 Summary statistics from the meta-analyses of those in the highest BMI category relative to those in the lowest, including sub-group and sensitivity analyses

|                            | Reference category | No. of studies | Pooled risk ratio | I <sup>2</sup> , heterogeneity test p-value |
|----------------------------|--------------------|----------------|-------------------|---------------------------------------------|
| BMI category               | Lowest             | 8              | 1.55 (0.99,2.45)  | 99.6%, p<0.001                              |
| Subgroup by outcome        |                    |                |                   |                                             |
| - BMI assessment           | Lowest             | 4              | 1.55 (1.06,2.26)  | 99.8%, p<0.001                              |
| - BMI diagnosis assessment | Lowest             | 4              | 3.53 (0.30,40.9)  | 99.3%, p<0.001                              |
| Sensitivity by quality     |                    |                |                   |                                             |
| - High quality             | Lowest             | 4              | 2.56 (0.45,14.6)  | 99.3%, p<0.001                              |

The funnel plot, Figure S6.6, again shows that some of the smaller studies reported relatively high risk ratios for BMI assessment in the heavier group. However, this pattern is not completely consistent, and the small number of studies precludes formal hypothesis testing for bias.

Figure S6.6 Funnel plot of BMI category as a predictor of BMI assessment

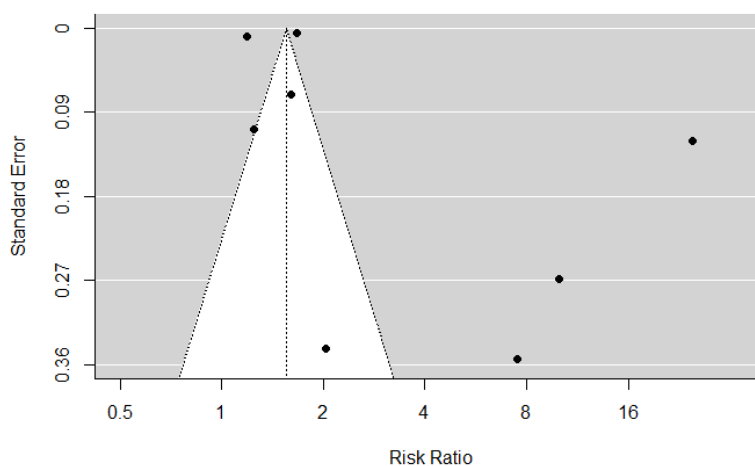

### S6.7 Smoking status as a predictor of BMI assessment

Only three studies reported the relative rate of BMI assessment by smoking status.[66 78 83]

The meta-analysis report results of current smokers relative to never smokers. There was high heterogeneity between the three studies and no evidence of association between smoking status and BMI assessment (Table S6.7). Given the small number of studies, sub-group and sensitivity analyses were not pursued.

Table S6.7 Summary statistics from the meta-analysis of greatest deprivation relative to least

|                | Reference category | No. of studies | Pooled risk ratio | I <sup>2</sup> , heterogeneity test p-value |
|----------------|--------------------|----------------|-------------------|---------------------------------------------|
| Smoking status | Non smoker         | 3              | 1.01 (0.90,1.14)  | 98.3%, p<0.001                              |

### S6.8 The number of comorbidities as a predictor of BMI assessment

In this meta-analysis we have equated the terms ‘Obesity-related comorbidities’,[64] ‘Comorbid conditions’,[67] ‘Multimorbidity’,[68] ‘Disease counts’,[72] ‘Chronic condition’,[83] ‘Charlson comorbidity index’,[77] and ‘Number of diagnoses recorded’[82] to ‘Comorbidities’. The comparison of the relative frequency of BMI assessment comparing the highest comorbidity class with the lowest are pooled in the meta-analysis. The actual comparisons pooled are 5+ relative to 0,[67 78] 3+ relative to 0,[64 72 82] 2+ relative to 0-1,[68] at least one comorbidity present relative to absent,[74 83] Charlson comorbidity index of 5+ relative to 0,[77] and ‘very high’ relative to ‘lower’[65] based on the presence of absence of specific diagnosis codes.

One study[75] analysed the number of comorbidities as a numeric variable and could not be included in the current meta-analysis.

The meta-analysis provides statistically significant evidence that BMI assessment is more common in those in the highest number of comorbidities category, as compared to those in the low comorbidity category (Table S6.8). This effect can be seen in all subgroups and the association is slightly stronger in the higher quality studies (Table S6.8). The clinical magnitude of this association cannot be resolved due to the very high levels of heterogeneity overall and within each sub-group. The Funnel plot (Figure S6.8) and Egger's test ( $p=0.932$ ) reveal no consistent evidence of reporting bias.

Table S6.8 Summary statistics from the meta-analyses of most comorbidities relative to least, including sub-group and sensitivity analyses

|                            | Reference category | No. of studies | Pooled risk ratio | I <sup>2</sup> , heterogeneity test p-value |
|----------------------------|--------------------|----------------|-------------------|---------------------------------------------|
| Number of comorbidities    | Fewest             | 10             | 2.11 (1.60,2.79)  | 99.6%, $p<0.001$                            |
| Subgroup by outcome        |                    |                |                   |                                             |
| - BMI assessment           | Fewest             | 7              | 2.16 (1.58,2.96)  | 99.6%, $p<0.001$                            |
| - BMI diagnosis assessment | Fewest             | 3              | 1.75 (0.33,9.20)  | 98.8%, $p<0.001$                            |
| Subgroup by country        |                    |                |                   |                                             |
| - Australia                | Fewest             | 2              | 1.98 (0.51,7.63)  | 99.5%, $p<0.001$                            |
| - UK                       | Fewest             | 2              | 2.19 (1.56,3.07)  | 99.9%, $p<0.001$                            |
| - USA                      | Fewest             | 3              | 1.72 (1.68,1.75)  | 0%, $p=0.783$                               |
| - Other                    | Fewest             | 3              | 4.09 (2.18,7.66)  | 94.1%, $p<0.001$                            |
| Sensitivity by quality     |                    |                |                   |                                             |
| - High quality             | Fewest             | 7              | 2.30 (1.53,3.45)  | 99.5%, $p<0.001$                            |

Figure S6.8 Funnel plot of number of comorbidities as a predictor of BMI assessment

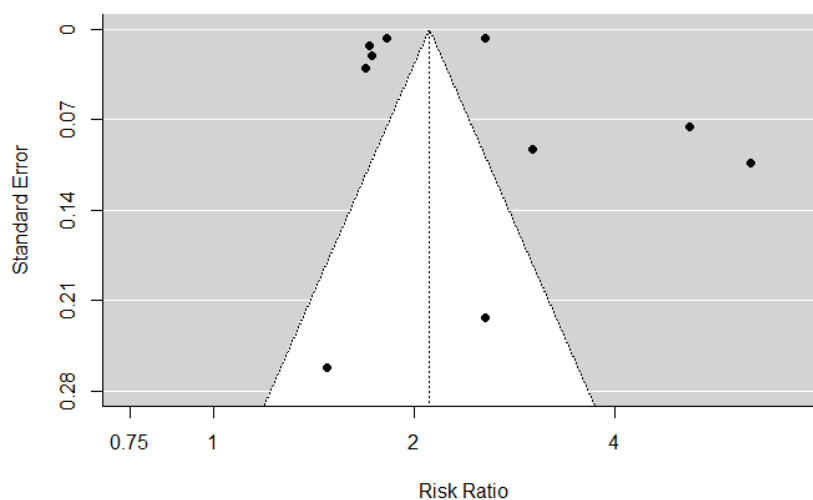

### S6.9 Cardiovascular disease as a predictor of BMI assessment

This meta-analysis has combined the terms ‘Diagnosis with vascular complications’[67] and ‘Presence of heart disease’[84] with ‘Cardio-vascular disease’. All studies reported the assessment of BMI in the cardiovascular disease group relative to those without cardiovascular disease.

The pooled risk ratios from the meta-analyses and associated 95% confidence intervals summarised in Table S6.9 do not provide any statistically significant evidence of association between the presence of cardiovascular disease and the assessment of BMI.

Table S6.9 Summary statistics from the meta-analyses of those with cardio-vascular disease relative to those without, including sub-group and sensitivity analyses

|                            | Reference category | No. of studies | Pooled risk ratio | I <sup>2</sup> , heterogeneity test p-value |
|----------------------------|--------------------|----------------|-------------------|---------------------------------------------|
| Cardiovascular disease     | No                 | 7              | 0.94 (0.81,1.10)  | 98.0%, p<0.001                              |
| Subgroup by outcome        |                    |                |                   |                                             |
| - BMI assessment           | No                 | 4              | 0.99 (0.78,1.24)  | 95.3%, p<0.001                              |
| - BMI diagnosis assessment | No                 | 3              | 0.93 (0.31,2.80)  | 98.9%, p<0.001                              |



|                                          |    |   |                  |                |
|------------------------------------------|----|---|------------------|----------------|
| Sensitivity by quality<br>- High quality | No | 4 | 0.93 (0.71,1.23) | 96.4%, p<0.001 |
|------------------------------------------|----|---|------------------|----------------|

The funnel plot presented in Figure S6.9 shows high outliers to the right of most studies but as the number of studies is less than 10, we have not proceeded with testing for publication bias.

Figure S6.9 Funnel plot of cardiovascular disease as a predictor of BMI assessment

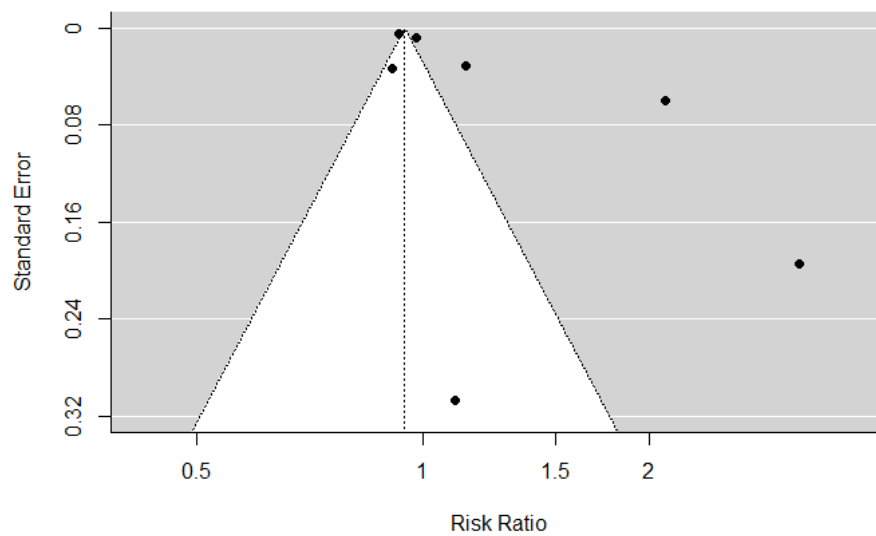

### S6.10 Diabetes as a predictor of BMI assessment

The assessment of BMI among those with a diagnosis of diabetes was compared to the assessment of BMI among those without in 9 studies. The meta-analysis results are summarised in Table S6.10. Overall, there is insufficient evidence to conclude the BMI assessment differs between those with and those without diabetes, with the very high heterogeneity between the studies contributing uncertainty. However, subgroup analyses suggest a statistically significant increase in BMI assessment for Australian patients with diabetes, consistent across all 3 studies ( $I^2=0\%$ ) and statistically significant increase in BMI assessment in the 4 studies where BMI was recorded as a diagnosis, also with low heterogeneity ( $I^2=30.8\%$ ).

Table S6.10 Summary statistics from the meta-analyses of those with diabetes relative to those without, including sub-group and sensitivity analyses

|                            | Reference category | No. of studies | Pooled risk ratio | $I^2$ , heterogeneity test p-value |
|----------------------------|--------------------|----------------|-------------------|------------------------------------|
| Diabetes                   | No                 | 9              | 1.19 (0.93,1.52)  | 99.0%, $p<0.001$                   |
| Subgroup by outcome        |                    |                |                   |                                    |
| - BMI assessment           | No                 | 5              | 1.10 (0.48,2.52)  | 99.4%, $p<0.001$                   |
| - BMI diagnosis assessment | No                 | 4              | 1.24 (1.04,1.48)  | 30.8%, $p=0.227$                   |
| Subgroup by country        |                    |                |                   |                                    |
| - Australia                | No                 | 3              | 1.84 (1.75,1.93)  | 0%, $p=0.841$                      |
| - USA                      | No                 | 4              | 1.17 (0.99,1.40)  | 99.2%, $p<0.001$                   |
| - Other                    | No                 | 2              | 8.63 (3.42,21.8)  | 79.4%, $p=0.028$                   |
| Sensitivity by quality     |                    |                |                   |                                    |
| - High quality             | No                 | 7              | 1.26 (0.66,2.41)  | 98.4% ( $p<0.001$ )                |

The funnel plot (Figure S6.10) shows most of the smaller studies falling to the right of the expected range. Egger's test returns a highly statistically significant result ( $p=0.004$ ) but, given there are less than 10 studies, some care is warranted in the interpretation of this result.

Figure S6.10 Funnel plot of diabetes as a predictor of BMI assessment

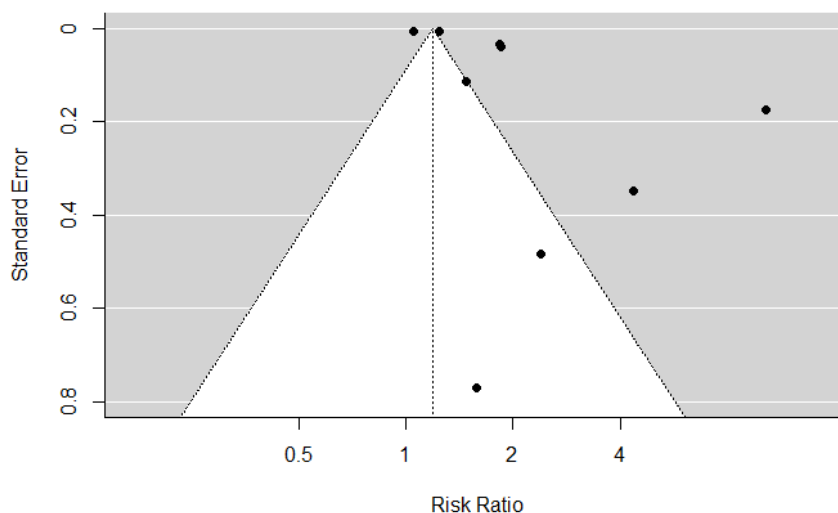

### S6.11 Dyslipidaemia disease as a predictor of BMI assessment

For the meta-analysis the presence of ‘Hyperlipidaemia’ [69 72 82] and ‘Presence of cholesterol’ [84] were combined with ‘Dyslipidaemia’.[77] The overall meta-analysis (Table S6.11) provides insufficient evidence to conclude the BMI assessment differs between those with and those without dyslipidaemia, with the very high heterogeneity between the studies. However, subgroup analyses suggest a statistically significant increase in BMI assessment for Australian patients with dyslipidaemia and where BMI was recorded as a diagnosis. There is still considerable heterogeneity between studies even within these sub-groups ( $I^2=80.6\%$  and  $I^2=50.9\%$  respectively) also with low heterogeneity ( $I^2=30.8\%$ ). Restricting analyses to studies with the highest quality ranking produced statistically significant evidence of effect and decreased heterogeneity between the remaining studies ( $I^2=57.3\%$ ).

S6.11 Summary statistics from the meta-analyses of those with dyslipidaemia relative to those without, including sub-group and sensitivity analyses

|                            | Reference category | No. of studies | Pooled risk ratio | $I^2$ , heterogeneity test p-value |
|----------------------------|--------------------|----------------|-------------------|------------------------------------|
| Dyslipidaemia              | No                 | 6              | 1.12 (0.92,1.37)  | 99.5%, p<0.001                     |
| Subgroup by outcome        |                    |                |                   |                                    |
| - BMI assessment           | No                 | 3              | 0.99 (0.76,1.30)  | 98.2%, p<0.001                     |
| - BMI diagnosis assessment | No                 | 3              | 1.21 (1.03,1.42)  | 50.9%, p=0.131                     |
| Subgroup by country        |                    |                |                   |                                    |

|                        |    |   |                  |                |
|------------------------|----|---|------------------|----------------|
| - Australia            | No | 3 | 1.21 (1.08,1.36) | 80.6% p=0.059  |
| - USA                  | No | 3 | 1.12 (0.90,1.39) | 99.8%, p<0.001 |
| Sensitivity by quality |    |   |                  |                |
| - High quality         | No | 4 | 1.21 (1.15,1.28) | 57.3%, p=0.071 |

The funnel plot (Figure S6.11) shows most studies are equivalent size with the two smaller studies both reporting an increase in BMI assessment among people with dyslipidaemia. There are insufficient studies to allow statistical testing of this association.

Figure S6.11 Funnel plot of dyslipidaemia as a predictor of BMI assessment

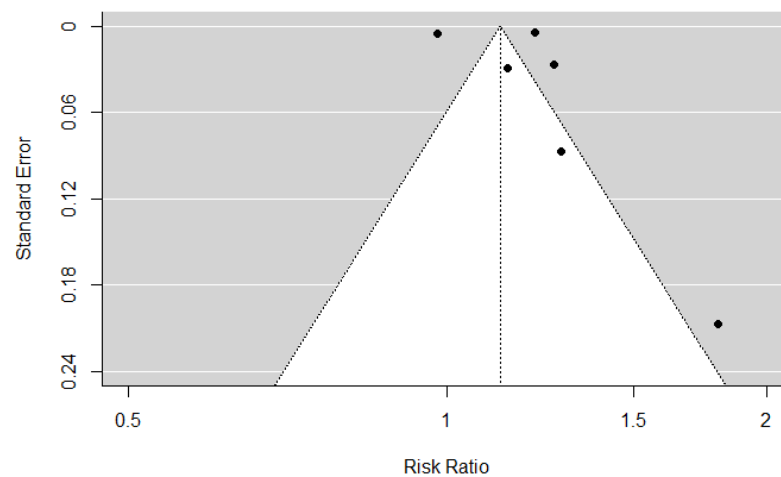

#### S6.12 Hypertension as a predictor of BMI assessment

For this meta-analysis 'Presence of high blood pressure'[84] was regarded as equivalent to 'Hypertension' and 'Hypertensive'. The pattern of results is like those from the previous chronic comorbidities meta-analyses. The overall meta-analysis (Table S6.12) suffered very high heterogeneity and fell short of statistical significance. However, subgroup analyses partially alleviated the heterogeneity and suggested a statistically significant increase in BMI assessment both for Australian patients with hypertension and where BMI was recorded as a diagnosis. Restricting analyses to studies with the highest quality rating allowed a statistically significant result but failed to address the heterogeneity between studies.

Figure S6.12 Summary statistics from the meta-analyses of those with hypertension relative to those without, including sub-group and sensitivity analyses

|                            | Reference category | No. of studies | Pooled risk ratio | I <sup>2</sup> , heterogeneity test p-value |
|----------------------------|--------------------|----------------|-------------------|---------------------------------------------|
| Hypertension               | No                 | 10             | 1.17 (0.98,1.40)  | 99.5%, p<0.001                              |
| Subgroup by outcome        |                    |                |                   |                                             |
| - BMI assessment           | No                 | 6              | 1.11 (0.83,1.48)  | 99.7%, p<0.001                              |
| - BMI diagnosis assessment | No                 | 4              | 1.24 (1.20,1.28)  | 2.2%, p=0.382                               |
| Subgroup by country        |                    |                |                   |                                             |
| - Australia                | No                 | 3              | 1.15 (1.05,1.26)  | 69.4%, p=0.038                              |
| - UK                       | No                 | 2              | 1.33 (0.39,4.54)  | 99.4%, p<0.001                              |
| - USA                      | No                 | 4              | 1.14 (0.91,1.43)  | 99.8%, p<0.001                              |
| - Other                    | No                 | 1              | 3.20 (1.71,5.99)  | n.a.                                        |
| Sensitivity by quality     |                    |                |                   |                                             |
| - High quality             | No                 | 8              | 1.26 (1.10,1.43)  | 97.7%, p<0.001                              |

The funnel plot, Figure S6.12, again shows that some of the smaller studies report relatively high risk ratios for BMI assessment in the hypertensive group. However, there are exceptions and Egger's test returned no statistically significant evidence of bias (p=0.293).

Figure S6.12 Funnel plot of hypertension as a predictor of BMI assessment

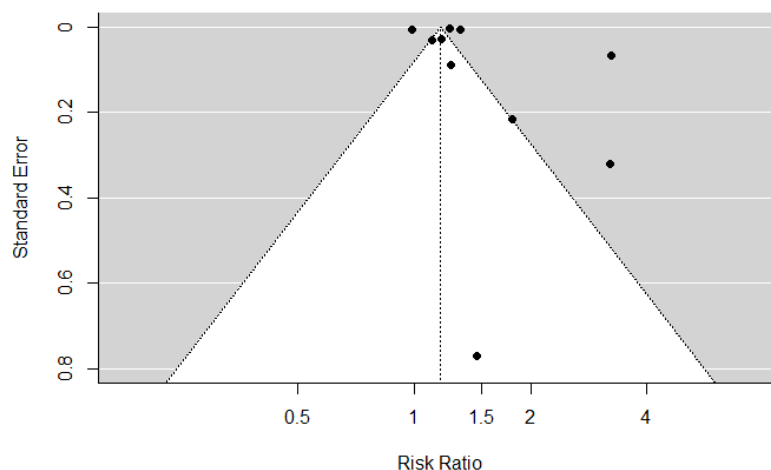

### S6.13 Mental illness as a predictor of BMI assessment

Three studies compared the rate of BMI reporting for those with 'mental illness',[72] 'serious mental illness',[68] or 'severe mental illness'[79] to those without. These studies returned

strongly heterogeneous results ( $I^2=99.6\%$ ) and the pooled risk ratio (Table S6.13) did not provide any statistically significant evidence of association between mental illness and BMI assessment.

Table S6.13 Summary statistics from the meta-analysis of those with mental illness relative to those without

|                | Reference category | No. of studies | Pooled risk ratio | $I^2$ , heterogeneity test p-value |
|----------------|--------------------|----------------|-------------------|------------------------------------|
| Mental illness | Not present        | 3              | 1.16 (0.79,1.70)  | 99.6%, $p<0.001$                   |

#### S6.14 Depression as a predictor of BMI assessment

Three studies compared the rate of BMI reporting for those with ‘depression’, [75 77] or ‘depression and anxiety’ [82] to those without. These studies returned strongly heterogeneous results ( $I^2=98.7\%$ ) and the pooled risk ratio (Table S6.14) did not provide statistically significant evidence of association between mental illness and BMI assessment.

Table S6.14 Summary statistics from the meta-analysis of those with depression relative to those without

|            | Reference category | No. of studies | Pooled risk ratio | $I^2$ , heterogeneity test p-value |
|------------|--------------------|----------------|-------------------|------------------------------------|
| Depression | Not present        | 3              | 1.22 (0.85,1.74)  | 98.7%, $p<0.001$                   |

### Supplementary Section S7: References

1. Benson C, Kisely S, Korman N, Moss K. Compliance of metabolic monitoring at rehabilitation facilities. *Australasian Psychiatry* 2018;**26**(1):41-46 doi: <http://dx.doi.org/10.1177/1039856217737899>[published Online First: Epub Date]].
2. Bleich SN, Bennett WL, Gudzone KA, Cooper LA. Impact of physician BMI on obesity care and beliefs. *Obesity* 2012;**20**(5):999-1005 doi: <https://dx.doi.org/10.1038/oby.2011.402>[published Online First: Epub Date]].
3. Bocquier A, Verger P, Basdevant A, Andreotti G, Baretge J, Villani P, Paraponaris A. Overweight and obesity: knowledge, attitudes, and practices of general practitioners in france. *Obesity Research* 2005;**13**(4):787-95
4. Campbell K, Engel H, Timperio A, Cooper C, Crawford D. Obesity management: Australian general practitioners' attitudes and practices. *Obesity Research* 2000;**8**(6):459-66
5. Fruh SM, Golden A, Graves RJ, Hall HR, Minchew LA, Williams S. Advanced Practice Nursing student knowledge in obesity management: A mixed methods research study. *Nurse Education Today* 2019;**77**:59-64 doi: 10.1016/j.nedt.2019.03.006[published Online First: Epub Date]].
6. Hauff C, Fruh SM, Sims BM, Williams SG, Herf C, Golden A, Graves RJ, Minchew LA, Hall HR. Nurse practitioner students' observations of preceptor engagement in obesity management and weight bias: A mixed-methods approach. *Journal of the American Association of Nurse Practitioners* 2020;**32**(7):520-29 doi: <http://dx.doi.org/10.1097/JXX.000000000000440>[published Online First: Epub Date]].

7. Huber CA, Mohler-Kuo M, Zellweger U, Zoller M, Rosemann T, Senn O. Obesity management and continuing medical education in primary care: results of a Swiss survey. *BMC Family Practice* 2011;**12**:140 doi: <https://dx.doi.org/10.1186/1471-2296-12-140>[published Online First: Epub Date]].
8. Hyer S, Edwards J. Weight Management Practices Among Florida Nurse Practitioners: A Cross-Sectional Study. *Journal for Nurse Practitioners* 2020;**16**(2):131-35 doi: 10.1016/j.nurpra.2019.10.025[published Online First: Epub Date]].
9. Laidlaw A, Napier C, Neville F, Collinson A, Cecil JE. Talking about weight talk: primary care practitioner knowledge, attitudes and practice. *Journal of Communication in Healthcare* 2019;**12**(3/4):145-53 doi: 10.1080/17538068.2019.1646061[published Online First: Epub Date]].
10. McLaughlin JC, Hamilton K, Kipping R. Epidemiology of adult overweight recording and management by UK GPs: a systematic review. *Br J Gen Pract* 2017;**67**(663):e676-e83 doi: 10.3399/bjgp17X692309[published Online First: Epub Date]].
11. Ruser CB, Sanders L, Brescia GR, Talbot M, Hartman K, Vivieros K, Bravata DM. Identification and management of overweight and obesity by internal medicine residents. *Journal of General Internal Medicine* 2005;**20**(12):1139-41
12. Sebianny AM. Primary care physicians' knowledge and perceived barriers in the management of overweight and obesity. *J Family Community Med* 2013;**20**(3):147-52 doi: <https://dx.doi.org/10.4103/2230-8229.121972>[published Online First: Epub Date]].
13. Smith K, James K, Standard-Goldson A. Adult obesity: Management practices of general practitioners/ family physicians in Kingston and St Andrew, Jamaica. *West Indian*



- Medical Journal 2018;**67**(5):433-38 doi:  
<http://dx.doi.org/10.7727/wimj.2018.184>[published Online First: Epub Date]].
14. Smith PD, O'Halloran P, Hahn DL, Grasmick M, Radant L. Screening for obesity: clinical tools in evolution, a WREN study. *Wmj* 2010;**109**(5):274-78
15. Sze Y, Dixon L, Paterson H, Campbell N. New Zealand LMC midwives' approaches to discussing nutrition, activity and weight gain during pregnancy. *New Zealand College of Midwives Journal* 2014(50):24-29 doi: 10.12784/nzcomjn150.2014.4.24-29[published Online First: Epub Date]].
16. Critchlow N, Rosenberg G, Rungay H, Petty R, Vohra J. Weight assessment and the provision of weight management advice in primary care: a cross-sectional survey of self-reported practice among general practitioners and practice nurses in the United Kingdom. *BMC Family Practice* 2020;**21**(1):1-12 doi: 10.1186/s12875-020-01184-z[published Online First: Epub Date]].
17. Jimenez G, Tyagi S, Car J. Computer-assisted history taking for the improvement of the diabetes primary care consultation. *Diabetes Technology and Therapeutics* 2020;**22**(Supplement 1):A156-A57 doi:  
<http://dx.doi.org/10.1089/dia.2020.2525.abstracts>[published Online First: Epub Date]].
18. Fruh SM, Golden A, Graves RJ, Hall HR, Minchew LA, Williams S. Advanced Practice Nursing student knowledge in obesity management: A mixed methods research study. *Nurse education today* 2019;**77**:59-64
19. Nanda S, Adusumalli J, Hurt RT, Ghosh K, Fischer KM, Hagenbrock MC, Ganesh R, Ratroun BM, Raslau D, Schroeder DR, Wight EC, Kuhle CL, Thicke LA, Lazik N, Croghan IT. Obesity Management Education Needs Among General Internists: A Survey. *Journal of primary care & community health* 2021;**12**:21501327211013292

20. Baillargeon JP, St-Cyr-Tribble D, Xhignesse M, Brown C, Carpentier AC, Fortin M, Grant A, Simoneau-Roy J, Langlois MF. Impact of an educational intervention combining clinical obesity preceptorship with electronic networking tools on primary care professionals: a prospective study. *BMC Medical Education* 2020;**20**(1):361 doi: <https://dx.doi.org/10.1186/s12909-020-02248-5>[published Online First: Epub Date]].
21. Barnes ER, Theeke LA, Mallow J. Impact of the Provider and Healthcare team Adherence to Treatment Guidelines ( PHAT- G) intervention on adherence to national obesity clinical practice guidelines in a primary care centre. *Journal of Evaluation in Clinical Practice* 2015;**21**(2):300-06 doi: 10.1111/jep.12308[published Online First: Epub Date]].
22. Berry AC, Berry NA, Myers TS, Reznicek J, Berry BB. Physician Body Mass Index and Bias Toward Obesity Documentation Patterns. *Ochsner Journal* 2018;**18**(1):66-71
23. Bleich SN, Gudzone KA, Bennett WL, Jarlenski MP, Cooper LA. How does physician BMI impact patient trust and perceived stigma? *Preventive Medicine* 2013;**57**(2):120-24 doi: 10.1016/j.ypmed.2013.05.005[published Online First: Epub Date]].
24. Bronder KL, Dooyema CA, Onufrak SJ, Foltz JL. Electronic health records to support obesity-related patient care: Results from a survey of United States physicians. *Preventive Medicine* 2015;**77**:41-47 doi: 10.1016/j.ypmed.2015.04.018[published Online First: Epub Date]].
25. Engstrom M, Skytt B, Ernesater A, Flackman B, Mamhidir AG. District nurses' self-reported clinical activities, beliefs about and attitudes towards obesity management. *Applied Nursing Research* 2013;**26**(4):198-203 doi: <https://dx.doi.org/10.1016/j.apnr.2013.06.009>[published Online First: Epub Date]].
26. Forster AS, Burgess C, Dodhia H, Fuller F, Miller J, McDermott L, Gulliford MC. Do health checks improve risk factor detection in primary care? Matched cohort study

- using electronic health records. *Journal of Public Health* 2016;**38**(3):552-59 doi: 10.1093/pubmed/fdv119[published Online First: Epub Date]].
27. Trujillo-Garrido N, Bernal-Jimenez MA, Santi-Cano MJ. Evaluation of Obesity Management Recorded in Electronic Clinical History: A Cohort Study. *Journal of Clinical Medicine* 2020;**9**(8):23 doi: <https://dx.doi.org/10.3390/jcm9082345>[published Online First: Epub Date]].
28. Antognoli EL, Seeholzer EL, Gullett H, Jackson B, Smith S, Flocke SA. Primary Care Resident Training for Obesity, Nutrition, and Physical Activity Counseling: A Mixed-Methods Study. *Health Promotion Practice* 2017;**18**(5):672-80 doi: 10.1177/1524839916658025[published Online First: Epub Date]].
29. AuYoung M, Duru OK, Ponce NA, Mangione CM, Rodriguez HP. Frontline Experiences of a Practice Redesign to Improve Self-management of Obesity in Safety Net Clinics. *Journal of Ambulatory Care Management* 2015;**38**(2):153-63 doi: 10.1097/JAC.000000000000063[published Online First: Epub Date]].
30. Binhemd T, Larbi EB, Absood G. Obesity in a primary health care centre: A retrospective study. *Annals of Saudi Medicine* 1991;**11**(2):163-6
31. Bonney A, MacKinnon D, Barnett S, Mayne DJ, Dijkmans-Hadley B, Charlton K. A mixed-methods feasibility study of routinely weighing patients in general practice to aid weight management. *Australian Family Physician* 2017;**46**(12):928-33
32. Brixner D, Said Q, Kirkness C, Oberg B, Ben-Joseph R, Oderda G. Assessment of cardiometabolic risk factors in a national primary care electronic health record database. *Value in Health* 2007;**10**(SUPPL. 1):S29-S36 doi: <http://dx.doi.org/10.1111/j.1524-4733.2006.00152.x>[published Online First: Epub Date]].

33. Bryant J, Sze Lin Y, Sanson-Fisher R, Mazza D, Carey M, Walsh J, Bisquera A, Yoong SL. Is identification of smoking, risky alcohol consumption and overweight and obesity by General Practitioners improving? A comparison over time. *Family Practice* 2015;**32**(6):664-71 doi: 10.1093/fampra/cmz078[published Online First: Epub Date]].
34. Castillejos MC, Martín-Pérez C, García-Ruiz A, Mayoral-Cleries F, Moreno-Küstner B. Recording of cardiovascular risk factors by general practitioners in patients with schizophrenia. *Annals of General Psychiatry* 2020;**19**(1):1-8 doi: 10.1186/s12991-020-00284-5[published Online First: Epub Date]].
35. Davis NJ, Emerenini A, Wylie-Rosett J. Obesity management: physician practice patterns and patient preference. *Diabetes Educator* 2006;**32**(4):557-61
36. Dutton GR, Herman KG, Tan F, Goble M, Dancer-Brown M, Van Vessem N, Ard JD. Patient and physician characteristics associated with the provision of weight loss counseling in primary care. *Obesity Research & Clinical Practice* 2014;**8**(2):e123-30 doi: <https://dx.doi.org/10.1016/j.orcp.2012.12.004>[published Online First: Epub Date]].
37. Fitzpatrick SL, Dickins K, Avery E, Ventrelle J, Shultz A, Kishen E, Rothschild S. Effect of an obesity best practice alert on physician documentation and referral practices. *Translational Behavioral Medicine* 2017;**7**(4):881-90 doi: <https://dx.doi.org/10.1007/s13142-017-0514-0>[published Online First: Epub Date]].
38. Gibbs HD, Broom J, Brown J, Laws RA, Reckless JPD, Noble PA, Kumar S, McCombie EL, Lean MEJ, Lyons FG, Frost GS, Quinn MF, Barth JH, Haynes SM, Finer N, Ross HM, Hole DJ, Montazeri A. Current approaches to obesity management in UK primary care: The counterweight programme. *Journal of Human Nutrition and Dietetics* 2004;**17**(3):183-90 doi: <http://dx.doi.org/10.1111/j.1365-277X.2004.00528.x>[published Online First: Epub Date]].

39. Heywood A, Ring I, Sanson-Fisher R, Mudge P. Screening for cardiovascular disease and risk reduction counselling behaviors of general practitioners. *Preventive Medicine* 1994;**23**(3):292-301
40. Klein Woolthuis EP, de Grauw WJC, van Gerwen WHEM, van den Hoogen HJM, van de Lisdonk EH, Metsemakers JFM, van Weel C. Identifying people at risk for undiagnosed type 2 diabetes using the GP's electronic medical record. *Family Practice* 2007;**24**(3):230-36 doi: <http://dx.doi.org/10.1093/fampra/cmm018>[published Online First: Epub Date]].
41. Bordowitz R, Morland K, Reich D. The use of an electronic medical record to improve documentation and treatment of obesity. *Family Medicine* 2007;**39**(4):274-9
42. Logue E, Gilchrist V, Bourguet C, Bartos P. Recognition and management of obesity in a family practice setting. *Journal of the American Board of Family Practice* 1993;**6**(5):457-63
43. Thapa R, Friderici J, Kleppel R, Fitzgerald J, Rothberg MB. Do physicians underrecognize obesity? *Southern Medical Journal* 2014;**107**(6):356-60 doi: <https://dx.doi.org/10.14423/01.SMJ.0000450707.44388.0c>[published Online First: Epub Date]].
44. Lemay CA, Cashman S, Savageau J, Fletcher K, Kinney R, Long-Middleton E. Underdiagnosis of obesity at a community health center. *Journal of the American Board of Family Practice* 2003;**16**(1):14-21
45. Funk LM, Ying S, Voils CI, Kloke J, Hanrahan LP, Shan Y. Electronic Health Record Data Versus the National Health and Nutrition Examination Survey (NHANES): A Comparison of Overweight and Obesity Rates. *Medical Care* 2017;**55**(6):598-605 doi: 10.1097/MLR.0000000000000693[published Online First: Epub Date]].

46. Andreacchi AT, Griffith LE, Guindon GE, Mayhew A, Bassim C, Pigeysre M, Stranges S, Anderson LN. Body mass index, waist circumference, waist-to-hip ratio, and body fat in relation to health care use in the Canadian Longitudinal Study on Aging. *International Journal of Obesity* 2021;**45(3)**:666-76
47. Bhanji S, Khuwaja AK, Siddiqui F, Azam I, Kazmi K. Underestimation of weight and its associated factors among overweight and obese adults in Pakistan: a cross sectional study. *BMC public health* 2011;**11(1)**:363
48. Ewe MB, Lydell M, Bergh H, Hildingh C, Baigi A, Mansson J. Characteristics of patients seeking a health promotion and weight reduction program in primary care. *Journal of Multidisciplinary Healthcare* 2019;**12**:235-42 doi: <http://dx.doi.org/10.2147/JMDH.S195269>[published Online First: Epub Date]].
49. Sebo P, Herrmann FR, Haller DM. Accuracy of anthropometric measurements by general practitioners in overweight and obese patients. *BMC Obesity* 2017;**4(1) (no pagination)**
50. Spencer L, O'Shea MC, Ball L, Desbrow B, Leveritt M. Attendance, weight and waist circumference outcomes of patients with type 2 diabetes receiving Medicare-subsidised dietetic services. *Australian Journal of Primary Health* 2014;**20(3)**:291-97
51. Vrdoljak D, Markovic BB, Kranjcevic K, Lalic DI, Vucak J, Katic M. How well do anthropometric indices correlate with cardiovascular risk factors? A cross-sectional study in Croati. *Medical Science Monitor* 2012;**18(2)**:PH6-PH11
52. Forgione N, Deed G, Kilov G, Rigas G. Managing Obesity in Primary Care: Breaking Down the Barriers. *Advances in Therapy* 2018;**35(2)**:191-98
53. Ashman F, Sturgiss E, Haesler E. Exploring Self-Efficacy in Australian General Practitioners Managing Patient Obesity: A Qualitative Survey Study. *int*

- 2016;**2016**:8212837 doi: <https://dx.doi.org/10.1155/2016/8212837>[published Online First: Epub Date]].
54. Baker AM, Smith KC, Coa KI, Helzlsouer KJ, Caulfield LE, Peairs KS, Shockney LD, Klassen AC. Clinical Care Providers' Perspectives on Body Size and Weight Management Among Long-Term Cancer Survivors. *Integrative Cancer Therapies* 2015;**14**(3):240-48 doi: 10.1177/1534735415572882[published Online First: Epub Date]].
55. Bornhoeft K. Perceptions, Attitudes, and Behaviors of Primary Care Providers Toward Obesity Management: A Qualitative Study. *Journal of Community Health Nursing* 2018;**35**(3):85-101 doi: 10.1080/07370016.2018.1475792[published Online First: Epub Date]].
56. Mazza D, McCarthy E, Carey M, Turner L, Harris M. "90% of the time, it's not just weight": General practitioner and practice staff perspectives regarding the barriers and enablers to obesity guideline implementation. *Obesity Research & Clinical Practice* 2019;**13**(4):398-403 doi: <https://dx.doi.org/10.1016/j.orcp.2019.04.001>[published Online First: Epub Date]].
57. Asselin JD, Osunlana A, Ogunleye A, Sharma AM, Campbell-Scherer D. Hidden in plain sight: The embedded nature of obesity in primary care visits. *Canadian Journal of Diabetes* 2015;**1**):S53
58. Gunther S, Guo F, Sinfield P, Rogers S, Baker R. Barriers and enablers to managing obesity in general practice: a practical approach for use in implementation activities. *Quality in Primary Care* 2012;**20**(2):93-103
59. Aboueid S, Bourgeault I, Giroux I. Nutrition care practices of primary care providers for weight management in multidisciplinary primary care settings in Ontario, Canada - a

- qualitative study. *BMC Family Practice* 2018;**19**(1):69 doi:  
<https://dx.doi.org/10.1186/s12875-018-0760-3>[published Online First: Epub Date]].
60. Campbell K, Engel H, Timperio A, Cooper C, Crawford D. Obesity management: Australian general practitioners' attitudes and practices. *Obesity research* 2000;**8**(6):459-66
61. Doherty AJ, Jones SP, Chauhan U, Gibson JME. Healthcare practitioners' views and experiences of barriers and facilitators to weight management interventions for adults with intellectual disabilities. *Journal of applied research in intellectual disabilities : JARID* 2019;**32**(5):1067-77
62. Bocquier A, Verger P, Basdevant A, Andreotti G, Baretge J, Villani P, Paraponaris A. Overweight and obesity: knowledge, attitudes, and practices of general practitioners in france. *Obesity research* 2005;**13**(4):787-95
63. Aleem S, Lasky R, Brooks WB, Batsis JA. Obesity perceptions and documentation among primary care clinicians at a rural academic health center. *Obesity Research and Clinical Practice* 2015;**9**(4):408-15 doi:  
<http://dx.doi.org/10.1016/j.orcp.2015.08.014>[published Online First: Epub Date]].
64. Baer HJ, Karson AS, Soukup JR, Williams DH, Bates DW. Documentation and diagnosis of overweight and obesity in electronic health records of adult primary care patients. *JAMA Internal Medicine* 2013;**173**(17):1648-52 doi:  
10.1001/jamainternmed.2013.7815[published Online First: Epub Date]].
65. Bleich SN, Pickett-Blakely O, Cooper LA, Bleich SN, Pickett-Blakely O, Cooper LA. Physician practice patterns of obesity diagnosis and weight-related counseling. *Patient Education & Counseling* 2011;**82**(1):123-29 doi:  
10.1016/j.pec.2010.02.018[published Online First: Epub Date]].



66. Booth HP, Prevost AT, Gulliford MC. Epidemiology of clinical body mass index recording in an obese population in primary care: a cohort study. *Journal of Public Health* 2013;**35**(1):67-74 doi: [pubmed/fds063](https://pubmed.ncbi.nlm.nih.gov/238063/)[published Online First: Epub Date]].
67. Bramlage P, Wittchen HU, Pittrow D, Kirch W, Krause P, Lehnert H, Unger T, Hofler M, Kupper B, Dahm S, Bohler S, Sharma AM. Recognition and management of overweight and obesity in primary care in Germany. *Int J Obes Relat Metab Disord* 2004;**28**(10):1299-308
68. Cuccu Z, Abi-Aad G, Duggal A. Characteristics of patients with body mass index recorded within the Kent Integrated Dataset (KID). *BMJ health & care informatics* 2019;**26**(1) doi: <http://dx.doi.org/10.1136/bmjhci-2019-000026>[published Online First: Epub Date]].
69. Cyr PR, Haskins AE, Holt C, Hanifi J. Weighty Problems: Predictors of Family Physicians Documenting Overweight and Obesity. *Family Medicine* 2016;**48**(3):217-21
70. Dalton A, Bottle A, Okoro C, Majeed A, Millett C. Implementation of the NHS Health Checks programme: Baseline assessment of risk factor recording in an urban culturally diverse setting. *Family practice* 2011;**28**:34-40 doi: [10.1093/fampra/cmq068](https://doi.org/10.1093/fampra/cmq068)[published Online First: Epub Date]].
71. Emanuel G, Charlton J, Ashworth M, Gulliford MC, Dregan A. Cardiovascular risk assessment and treatment in chronic inflammatory disorders in primary care. *Heart* 2016;**102**(24):1957-62 doi: <https://dx.doi.org/10.1136/heartjnl-2016-310111>[published Online First: Epub Date]].
72. Ghosh A. Depressed, anxious and breathless missing out: Weight screening in general practice in a regional catchment of New South Wales. *Australian Journal of Rural*

- Health 2016;**24**(4):246-52 doi: 10.1111/ajr.12264[published Online First: Epub Date]].
73. Gonzalez-Chica DA, Bowden J, Miller C, Longo M, Nelson M, Reid C, Stocks N. Patient-reported GP health assessments rather than individual cardiovascular risk burden are associated with the engagement in lifestyle changes: population-based survey in South Australia. *BMC Family Practice* 2019;**20**(1):1-10 doi: 10.1186/s12875-019-1066-9[published Online First: Epub Date]].
74. Gutierrez Angulo ML, Amenabar Azurmendi MD, Cuesta Sole ML, Prieto Esteban I, Mancebo Martinez S, Iglesias Alonso A. Prevalence of obesity recorded in Primary Care. *Endocrinologia y Nutricion* 2014;**61**(9):469-73 doi: <https://dx.doi.org/10.1016/j.endonu.2014.03.012>[published Online First: Epub Date]].
75. Mattar A, Carlston D, Sariol G, Yu T, Almustafa A, Melton GB, Ahmed A. The prevalence of obesity documentation in Primary Care Electronic Medical Records. Are we acknowledging the problem? *Applied Clinical Informatics* 2017;**8**(1):67-79 doi: <https://dx.doi.org/10.4338/ACI-2016-07-RA-0115>[published Online First: Epub Date]].
76. Melamed OC, Nakar S, Vinker S. Suboptimal identification of obesity by family physicians. *American Journal of Managed Care* 2009;**15**(9):619-24
77. Mocarski M, Tian Y, Smolarz BG, McAna J, Crawford A. Use of International Classification of Diseases, Ninth Revision Codes for Obesity: Trends in the United States from an Electronic Health Record-Derived Database. *Population Health Management* 2018;**21**(3):222-30 doi: <https://dx.doi.org/10.1089/pop.2017.0092>[published Online First: Epub Date]].
78. Nicholson BD, Aveyard P, Bankhead CR, Hamilton W, Hobbs FDR, Lay-Flurrie S. Determinants and extent of weight recording in UK primary care: an analysis of 5

- million adults' electronic health records from 2000 to 2017. *BMC Medicine* 2019;**17**(1):222-22 doi: 10.1186/s12916-019-1446-y[published Online First: Epub Date]].
79. Osborn DPJ, Baio G, Walters KR, Petersen I, Limburg H, Raine R, Nazareth I. Inequalities in the provision of cardiovascular screening to people with severe mental illnesses in primary care Cohort study in the United Kingdom THIN Primary Care Database 2000 2007. *Schizophrenia Research* 2011;**129**:104-10
80. Rose SA, Turchin A, Grant RW, Meigs JB, Rose SA, Turchin A, Grant RW, Meigs JB. Documentation of body mass index and control of associated risk factors in a large primary care network. *BMC Health Services Research* 2009;**9**:236-36 doi: 10.1186/1472-6963-9-236[published Online First: Epub Date]].
81. Ruser CB, Sanders L, Brescia GR, Talbot M, Hartman K, Vivieros K, Bravata DM. Brief Report: Identification and management of overweight and obesity by internal medicine residents. *Journal of General Internal Medicine* 2005;**20**(12):1139-41 doi: <http://dx.doi.org/10.1111/j.1525-1497.2005.0263.x>[published Online First: Epub Date]].
82. Turner LR, Harris MF, Mazza D. Obesity management in general practice: does current practice match guideline recommendations? *Med J Aust* 2015;**202**(7):370-2 doi: 10.5694/mja14.00998[published Online First: Epub Date]].
83. Verberne LDM, Nielen MMJ, Leemrijse CJ, Verheij RA, Friele RD. Recording of weight in electronic health records: an observational study in general practice. *BMC family practice* 2018;**19**(1):174 doi: <http://dx.doi.org/10.1186/s12875-018-0863-x>[published Online First: Epub Date]].
84. Yoong SL, Carey ML, Sanson-Fisher RW, D'Este CA, Mackenzie L, Boyes A. A cross-sectional study examining Australian general practitioners' identification of

- overweight and obese patients. *JGIM: Journal of General Internal Medicine* 2014;**29**(2):328-34 doi: 10.1007/s11606-013-2637-4[published Online First: Epub Date]].
85. Dunkley AJ, Stone MA, Patel N, Davies MJ, Khunti K. Waist circumference measurement: knowledge, attitudes and barriers in patients and practitioners in a multi-ethnic population. *Family Practice* 2009;**26**(5):365-71 doi: <https://dx.doi.org/10.1093/fampra/cmp048>[published Online First: Epub Date]].
86. Gaynor B, Habermann B, Wright R. Waist Circumference Measurement Diffusion in Primary Care. *The Journal for Nurse Practitioners* 2018;**14**(9):683-88.e1 doi: 10.1016/j.nurpra.2018.06.002[published Online First: Epub Date]].
87. McHale CT, Laidlaw AH, Cecil JE. Primary care patient and practitioner views of weight and weight-related discussion: a mixed-methods study. *BMJ Open* 2020;**10**(3):(no pagination) doi: <https://dx.doi.org/10.1136/bmjopen-2019-034023>[published Online First: Epub Date]].
88. Borenstein M, Hedges L, Higgins J, Rothstein H. *Introduction to Meta-Analysis*, 2021.
